# Supplementary material for: The Nitro Group Reshapes the Effects of Pyrido[3,4-g]quinazoline Derivatives on DYRK/CLK Activity and RNA Splicing in Glioblastoma Cells
Source: Cancers (Basel). 2024 Feb 19;16(4):834. doi: 10.3390/cancers16040834 (PMC10886777; doi:10.3390/cancers16040834)
Supplement: Supplementary file 1 [file cancers-16-00834-s001.zip]

Archive with 4 entries (4 files):
- Supplementary Materials Figures S1-S8 and Tables S1 and S2.pdf
- Supporting Table S3.xlsx
- Supporting Table S4.xlsx
- Supporting Table S5.xlsx
