# Supplementary material for: The Nitro Group Reshapes the Effects of Pyrido[3,4-g]quinazoline Derivatives on DYRK/CLK Activity and RNA Splicing in Glioblastoma Cells
Source: Cancers (Basel). 2024 Feb 19;16(4):834. doi: 10.3390/cancers16040834 (PMC10886777; doi:10.3390/cancers16040834)
Supplement: Supplementary file 1 [file cancers-16-00834-s001.zip › Supporting Table S3.xlsx]

## Sheet: Protein PivotTable
Supporting Table 3 (Related to Figure 6). Results of LC-MS/MS identification of proteins that were co-purified with Fc-tagged CLK4 in a presence or absence of 2 or with a control protein.
Protein Accession Numbers	Protein Name	Gene Name	Spectral count
			Fc-CLK4	Fc-CLK4 + 2	Fc-Control
A0A024R1N1,P35579	Myosin, heavy polypeptide 9, non-muscle, isoform CRA_a	MYH9	485	518	304						MYH9	PE=3	SV=1
P08670,V9HWE1	Vimentin	VIM	387	430	265						VIM	PE=1	SV=4
P60709,Q1KLZ0,Q53G76,Q53GK6	Actin, cytoplasmic 1	ACTB	351	344	129						ACTB	PE=1	SV=1
Q6GMX6	IGH@ protein	IGH@	75	100	581						IGH@	PE=1	SV=1
P35580	Myosin-10	MYH10	264	262	208						MYH10	PE=1	SV=3
Q9HAZ1	Dual specificity protein kinase CLK4	CLK4	277	238	2						CLK4	PE=1	SV=1
H6VRG0,H6VRG1,P04264	Cytokeratin-1	KRT1	246	154	73						KRT1	PE=3	SV=1
P13645	Keratin, type I cytoskeletal 10	KRT10	238	131	44						KRT10	PE=1	SV=6
E7CU85,O15392	Baculoviral IAP repeat-containing 5	BIRC5	0	0	366						BIRC5	PE=1	SV=1
Q15149	Plectin	PLEC	96	94	65						PLEC	PE=1	SV=3
D3DVC4	Nestin, isoform CRA_c	NES	74	93	84						NES	PE=3	SV=1
A0A384MQX1,A0A6Q8PFJ0,P02545	Epididymis secretory sperm binding protein		94	102	54
P35908	Keratin, type II cytoskeletal 2 epidermal	KRT2	119	86	39						KRT2	PE=1	SV=2
P35527	Keratin, type I cytoskeletal 9	KRT9	90	95	48						KRT9	PE=1	SV=3
Q7Z406-2,Q7Z406-6	Isoform 2 of Myosin-14	MYH14	89	71	50						MYH14
A0A384MEE3,Q9BVA1	Tubulin beta chain		77	75	55
A0A384N5Z8,P23246	Epididymis secretory sperm binding protein		86	64	37
Q13435	Splicing factor 3B subunit 2	SF3B2	65	55	43						SF3B2	PE=1	SV=2
B3KT06,P68363	Tubulin alpha chain		60	55	44
G8JLA2,P60660-2	Myosin light polypeptide 6	MYL6	44	57	53						MYL6	PE=1	SV=1
A0A087X0K9	Tight junction protein 1 (Zona occludens 1), isoform CRA_a	TJP1	57	45	51						TJP1	PE=1	SV=2
P02533	Keratin, type I cytoskeletal 14	KRT14	59	60	28						KRT14	PE=1	SV=4
P12270	Nucleoprotein TPR	TPR	0	0	137						TPR	PE=1	SV=3
P15924	Desmoplakin	DSP	120	3	3						DSP	PE=1	SV=3
A0A024RBH2,Q07065	Cytoskeleton-associated protein 4, isoform CRA_c	CKAP4	46	56	23						CKAP4	PE=4	SV=1
Q8WXF1	Paraspeckle component 1	PSPC1	44	58	23						PSPC1	PE=1	SV=1
P13647	Keratin, type II cytoskeletal 5	KRT5	63	45	13						KRT5	PE=1	SV=3
A0A0S2Z4Z9,A0A7I2V5Y7,Q15233	Non-POU domain containing octamer-binding isoform 1 (Fragment)	NONO	54	36	20						NONO	PE=2	SV=1
A0A140VK53,Q9UQ35	Testicular secretory protein Li 53		60	48	2
P11021,V9HWB4	Endoplasmic reticulum chaperone BiP	HSPA5	43	41	22						HSPA5	PE=1	SV=2
P61247,Q6NXR8	40S ribosomal protein S3a	RPS3A	37	49	19						RPS3A	PE=1	SV=2
A0A0S2Z4G4,A0A0S2Z4I4,P06753-2,P06753-5	Tropomyosin 3 isoform 1 (Fragment)	TPM3	31	33	37						TPM3	PE=2	SV=1
P62280	40S ribosomal protein S11	RPS11	35	46	10						RPS11	PE=1	SV=3
P06396-2	Isoform 2 of Gelsolin	GSN	37	28	22						GSN
P60866	40S ribosomal protein S20	RPS20	29	45	13						RPS20	PE=1	SV=1
A0A0R4J2E8,A8MXP9,P43243	Matrin-3	MATR3	33	41	11						MATR3	PE=1	SV=1
A0A024R3Z1	Microtubule-associated protein	MAP2	27	28	28						MAP2	PE=4	SV=1
B2R491,P62701,Q53HV1,Q96IR1	40S ribosomal protein S4	RPS4X	33	37	13						RPS4X	PE=2	SV=1
Q14789-3,Q14789-4	Isoform 3 of Golgin subfamily B member 1	GOLGB1	13	15	55						GOLGB1
A0A384ME17,P49411	Elongation factor Tu	TUFM	30	29	23						TUFM	PE=1	SV=1
Q5SW79	Centrosomal protein of 170 kDa	CEP170	26	29	26						CEP170	PE=1	SV=1
A0A3B3ITZ9,Q9Y2W1	Thyroid hormone receptor-associated protein 3	THRAP3	31	34	15						THRAP3	PE=1	SV=1
A8CDT9,Q9Y4I1-2	MYO5A variant protein		33	31	15
P62249	40S ribosomal protein S16	RPS16	25	42	11						RPS16	PE=1	SV=2
O60504	Vinexin	SORBS3	29	20	28						SORBS3	PE=1	SV=2
P24821	Tenascin	TNC	23	38	14						TNC	PE=1	SV=3
A0A024RAI1,P61158	Actin-like protein 3	ACTR3	32	24	18						ACTR3	PE=3	SV=1
A0A1W2PPS1,A0A1X7SBS1,B4DLR3,Q00839,Q00839-2	Heterogeneous nuclear ribonucleoprotein U	HNRNPU	26	34	12						HNRNPU	PE=1	SV=1
Q68D86	Coiled-coil domain-containing protein 102B	CCDC102B	0	0	72						CCDC102B	PE=1	SV=4
O75533	Splicing factor 3B subunit 1	SF3B1	33	26	11						SF3B1	PE=1	SV=3
P11142,P11142-2,V9HW22	Heat shock cognate 71 kDa protein	HSPA8	24	23	23						HSPA8	PE=1	SV=1
P14866,Q6NTA2	Heterogeneous nuclear ribonucleoprotein L	HNRNPL	35	19	16						HNRNPL	PE=1	SV=2
P62081	40S ribosomal protein S7	RPS7	20	32	14						RPS7	PE=1	SV=1
Q8WWM7,Q8WWM7-2,Q8WWM7-3,Q8WWM7-4,Q8WWM7-5,Q8WWM7-6,Q8WWM7-8,Q8WWM7-9	Ataxin-2-like protein	ATXN2L	28	24	14						ATXN2L	PE=1	SV=2
A2A3R6,P62753,Q96DV6	40S ribosomal protein S6	RPS6	26	32	7						RPS6	PE=2	SV=1
K7ELC2,P62841	40S ribosomal protein S15	RPS15	26	33	6						RPS15	PE=1	SV=1
O15027-5	Isoform 5 of Protein transport protein Sec16A	SEC16A	23	25	16						SEC16A
H3BNC9,P08708	40S ribosomal protein S17		30	26	7
Q9UHB6-4	Isoform 4 of LIM domain and actin-binding protein 1	LIMA1	20	14	29						LIMA1
B0ZBD0,P39019	40S ribosomal protein S19	RPS19	24	26	9						RPS19	PE=2	SV=1
P62269	40S ribosomal protein S18	RPS18	23	27	9						RPS18	PE=1	SV=3
O15144,Q53R19	Actin-related protein 2/3 complex subunit 2	ARPC2	18	18	21						ARPC2	PE=1	SV=1
Q14161	ARF GTPase-activating protein GIT2	GIT2	30	21	4						GIT2	PE=1	SV=2
B7ZLP5	SAFB protein	SAFB	22	19	13						SAFB	PE=2	SV=1
Q9UQ03,Q9UQ03-2	Coronin-2B	CORO2B	19	21	14						CORO2B	PE=1	SV=4
P42766	60S ribosomal protein L35	RPL35	17	28	8						RPL35	PE=1	SV=2
Q15393	Splicing factor 3B subunit 3	SF3B3	23	21	9						SF3B3	PE=1	SV=4
P36578	60S ribosomal protein L4	RPL4	20	19	13						RPL4	PE=1	SV=5
A0A024R6W2,B2R6U8,O43809	Cleavage and polyadenylation specificity factor subunit 5	NUDT21	17	21	13						NUDT21	PE=3	SV=1
A0A0S2Z537,A8K6K1,O75150	E3 ubiquitin protein ligase (Fragment)	RNF40	22	15	14						RNF40	PE=2	SV=1
Q9ULX3	RNA-binding protein NOB1	NOB1	23	20	8						NOB1	PE=1	SV=1
Q9Y383-3	Isoform 3 of Putative RNA-binding protein Luc7-like 2	LUC7L2	18	17	16						LUC7L2
A0A0A0MRM8,A0A1Y0BRN0,A0A1Y0BRN3,Q9UM54-6	Unconventional myosin-6	MYO6	16	13	20						MYO6	PE=1	SV=1
P61160	Actin-related protein 2	ACTR2	19	21	9						ACTR2	PE=1	SV=1
Q0IIN1,Q7Z794	Keratin 77	KRT77	46	2	0						KRT77	PE=1	SV=1
P49750,P49750-1	YLP motif-containing protein 1	YLPM1	17	13	17						YLPM1	PE=1	SV=4
A0A4D5RAC7,A0A4D5RAC9,A0A4D5RAN2,P68104,Q53G85,Q53GE9,Q53HM9,Q53HQ7,Q53HR5,Q5VTE0,Q6IPN6,Q6IPS9,Q6IPT9	Tr-type G domain-containing protein		23	14	9
P08779	Keratin, type I cytoskeletal 16	KRT16	15	20	11						KRT16	PE=1	SV=4
Q02413	Desmoglein-1	DSG1	34	10	2						DSG1	PE=1	SV=2
A0A2R8Y811,P62263	40S ribosomal protein S14 (Fragment)	RPS14	19	14	12						RPS14	PE=1	SV=1
J3QRS3,O14950,P19105	Myosin regulatory light chain 12A	MYL12A	17	10	18						MYL12A	PE=1	SV=1
O95425-4	Isoform SV4 of Supervillin	SVIL	11	11	23						SVIL
P62424	60S ribosomal protein L7a	RPL7A	19	14	11						RPL7A	PE=1	SV=2
Q13573,Q6I9S2	SNW domain-containing protein 1	SNW1	18	15	11						SNW1	PE=1	SV=1
Q9P0K7,Q9P0K7-2,Q9P0K7-3,Q9P0K7-4	Ankycorbin	RAI14	11	18	15						RAI14	PE=1	SV=2
Q9UKJ3	G patch domain-containing protein 8	GPATCH8	19	25	0						GPATCH8	PE=1	SV=2
A0A024R4M0,P46781	40S ribosomal protein S9	RPS9	14	21	8						RPS9	PE=1	SV=1
F5H6E2,O00159,O00159-2,O00159-3	Unconventional myosin-Ic	MYO1C	20	12	11						MYO1C	PE=1	SV=1
A8K0T9,P52907	F-actin-capping protein subunit alpha		15	12	15
P23396	40S ribosomal protein S3	RPS3	12	20	10						RPS3	PE=1	SV=2
P32969,Q53Z07	60S ribosomal protein L9	RPL9	17	21	4						RPL9	PE=1	SV=1
P68371,Q8IZ29	Tubulin beta-4B chain	TUBB4B	14	19	9						TUBB4B	PE=1	SV=1
Q6WCQ1	Myosin phosphatase Rho-interacting protein	MPRIP	14	12	16						MPRIP	PE=1	SV=3
Q8IUD2,X6RLX0	ELKS/Rab6-interacting/CAST family member 1	ERC1	18	12	12						ERC1	PE=1	SV=1
A0A0J9YVP6,A0A0J9YYL3,Q9UHX1-2,Q9UHX1-4,Q9UHX1-6	60 kDa poly(U)-binding-splicing factor (Fragment)	PUF60	19	17	5						PUF60	PE=1	SV=1
A0A1W2PNV4	Uncharacterized protein		16	15	10
A7BI36,Q9P2E9	p180/ribosome receptor	RRBP1	21	15	5						RRBP1	PE=2	SV=2
A0A024R4Q8,M0R0F0,P46782,Q53G25	Ribosomal protein S5, isoform CRA_a	RPS5	16	18	6						RPS5	PE=3	SV=1
A0A384P5G6,A0A7I2V2G2,B7Z4V2,D6RCD7,P38646,Q8N1C8,V9HW84	75 kDa glucose-regulated protein		19	18	3
A3R0T8,B2R984,P10412,Q4VB24	Histone 1, H1e	HIST1H1E	14	18	8						HIST1H1E	PE=2	SV=1
P62241,Q5JR94	40S ribosomal protein S8	RPS8	17	19	4						RPS8	PE=1	SV=2
A0A024R814,P18124	Ribosomal protein L7, isoform CRA_a	RPL7	10	17	12						RPL7	PE=3	SV=1
A0A024R9C1,H0YAR2,P11940	Polyadenylate-binding protein	PABPC1	12	18	9						PABPC1	PE=3	SV=1
A0A024R261,A0A087WXM6,A0A0A6YYL6,J3KRX5,J3QQT2,P18621,P18621-3	60S ribosomal protein L17	hCG_24487	14	17	7						hCG_24487	PE=3	SV=1
A0A024RCA7,P05387	60S acidic ribosomal protein P2	RPLP2	14	10	13						RPLP2	PE=3	SV=1
A0A0S2Z428,B4DRR0,P02538	HCG2039812, isoform CRA_b (Fragment)	KRT6A	13	13	11						KRT6A	PE=2	SV=1
B7Z722,H7BYY1	Tropomyosin 1 (Alpha), isoform CRA_i	TPM1	11	14	12						TPM1	PE=2	SV=1
P49756	RNA-binding protein 25	RBM25	11	14	11						RBM25	PE=1	SV=3
Q9NYF8,Q9NYF8-2	Bcl-2-associated transcription factor 1	BCLAF1	17	15	4						BCLAF1	PE=1	SV=2
F8WJN3,Q16630,Q16630-2,Q16630-3	Cleavage and polyadenylation specificity factor subunit 6	CPSF6	12	9	14						CPSF6	PE=1	SV=1
Q10570	Cleavage and polyadenylation specificity factor subunit 1	CPSF1	19	9	7						CPSF1	PE=1	SV=2
A0A024R1Q8,P62829,Q9BTQ7	60S ribosomal protein L23	RPL23	13	12	9						RPL23	PE=3	SV=1
A0A024R6D4,P84090	Enhancer of rudimentary homolog	ERH	12	18	4						ERH	PE=3	SV=1
A0A024R3F4,A0A024R3H6,Q86UU1,Q86UU1-2	Pleckstrin homology-like domain, family B, member 1, isoform CRA_c	PHLDB1	14	11	8						PHLDB1	PE=4	SV=1
B2R8R5,Q13263,Q13263-2	cDNA, FLJ94025, highly similar to Homo sapiens tripartite motif-containing 28 (TRIM28), mRNA		14	13	6
P15880,Q3KQT6	40S ribosomal protein S2	RPS2	17	11	5						RPS2	PE=1	SV=2
P61962	DDB1- and CUL4-associated factor 7	DCAF7	15	14	4						DCAF7	PE=1	SV=1
Q01813	ATP-dependent 6-phosphofructokinase, platelet type	PFKP	14	10	9						PFKP	PE=1	SV=2
Q5VTR2	E3 ubiquitin-protein ligase BRE1A	RNF20	11	15	7						RNF20	PE=1	SV=2
A0A7I2YQF7,P27448,P27448-3,P27448-4,P27448-8	MAP/microtubule affinity-regulating kinase 3	MARK3	13	9	10						MARK3	PE=4	SV=1
J3QK89,Q8IWX8	Calcium homeostasis endoplasmic reticulum protein	CHERP	8	14	10						CHERP	PE=1	SV=1
P13674-2,Q5VSQ6	Isoform 2 of Prolyl 4-hydroxylase subunit alpha-1	P4HA1	14	11	7						P4HA1
A0A384MR50,B1AK87,B2R7T8,P47756,P47756-2	F-actin-capping protein subunit beta		9	11	11
P07437,Q5SU16	Tubulin beta chain	TUBB	13	12	6						TUBB	PE=1	SV=2
Q5VV67	Peroxisome proliferator-activated receptor gamma coactivator-related protein 1	PPRC1	17	14	0						PPRC1	PE=1	SV=1
A0A024R0Y5,A0A0S2Z4A1,A0A2R8Y891,P08237,P08237-3	ATP-dependent 6-phosphofructokinase	PFKM	12	9	9						PFKM	PE=2	SV=1
A0A2R8Y5V9,P67936,V9HW56	Tropomyosin alpha-4 chain	TPM4	7	11	12						TPM4	PE=1	SV=1
B4DGF8,F5H669,Q8N684,Q8N684-2,Q8N684-3	cDNA FLJ57877, highly similar to Cleavage and polyadenylation specificity factor 7		9	14	7
B7Z6G2	cDNA FLJ56152, highly similar to Rho guanine nucleotide exchange factor 7		7	12	11
E9KL35,P63244	Epididymis tissue sperm binding protein Li 3a		9	14	7
P78527,P78527-2	DNA-dependent protein kinase catalytic subunit	PRKDC	11	10	9						PRKDC	PE=1	SV=3
Q562R1	Beta-actin-like protein 2	ACTBL2	10	18	2						ACTBL2	PE=1	SV=2
Q6P2Q9	Pre-mRNA-processing-splicing factor 8	PRPF8	13	13	4						PRPF8	PE=1	SV=2
Q96A19	Coiled-coil domain-containing protein 102A	CCDC102A	0	0	30						CCDC102A	PE=1	SV=2
Q9NX20	39S ribosomal protein L16, mitochondrial	MRPL16	12	10	8						MRPL16	PE=1	SV=1
A0A024RBK3,Q02878,Q8N5Z7,Q8TBK5,Q9HBB3	60S ribosomal protein L6	RPL6	15	9	5						RPL6	PE=3	SV=1
Q15007	Pre-mRNA-splicing regulator WTAP	WTAP	11	10	8						WTAP	PE=1	SV=2
A0A024R8W0,P38919	RNA helicase	DDX48	14	14	0						DDX48	PE=3	SV=1
B1AHB0,B1AHB1,P33992,Q53FG5	DNA helicase	MCM5	7	15	6						MCM5	PE=1	SV=1
B3KS36,P39023	cDNA FLJ35376 fis, clone SKMUS2004044, highly similar to Homo sapiens ribosomal protein L3 (RPL3), transcript variant 2, mRNA		16	9	3
P01859	Immunoglobulin heavy constant gamma 2	IGHG2	1	0	27						IGHG2	PE=1	SV=2
P05141	ADP/ATP translocase 2	SLC25A5	12	9	7						SLC25A5	PE=1	SV=7
P20700	Lamin-B1	LMNB1	2	3	23						LMNB1	PE=1	SV=2
A4FU77,O75643	SNRNP200 protein (Fragment)	SNRNP200	9	16	2						SNRNP200	PE=2	SV=1
F2Z2X0,O00746,Q4TT34	Nucleoside diphosphate kinase	NME4	12	10	5						NME4	PE=1	SV=1
Q5HYL6,Q9NYL9	Uncharacterized protein DKFZp686E1899	DKFZp686E1899	10	6	11						DKFZp686E1899	PE=2	SV=1
A0A024RD80,P08238	Heat shock protein 90kDa alpha (Cytosolic), class B member 1, isoform CRA_a	HSP90AB1	17	2	7						HSP90AB1	PE=3	SV=1
A0A384MDY8,Q14247,Q53HG7	Epididymis secretory sperm binding protein		6	9	11
P04792,V9HW43	Heat shock protein beta-1	HSPB1	14	6	6						HSPB1	PE=1	SV=2
P14618,V9HWB8	Pyruvate kinase PKM	PKM	12	8	6						PKM	PE=1	SV=4
A0A024R694,B7Z565,H9KV75,P12814,P12814-2,P12814-3,P12814-4	Actinin, alpha 1, isoform CRA_a	ACTN1	4	2	19						ACTN1	PE=2	SV=1
P30414	NK-tumor recognition protein	NKTR	13	12	0						NKTR	PE=1	SV=2
P46778,Q6IAX2	60S ribosomal protein L21	RPL21	13	10	2						RPL21	PE=1	SV=2
Q86XP3	ATP-dependent RNA helicase DDX42	DDX42	13	2	10						DDX42	PE=1	SV=1
Q8NC51,Q8NC51-3	Plasminogen activator inhibitor 1 RNA-binding protein	SERBP1	9	10	6						SERBP1	PE=1	SV=2
A0A024R3T8,B2R5W3,P09874	Poly [ADP-ribose] polymerase	PARP1	8	11	5						PARP1	PE=4	SV=1
A0A248RGE3,B2RDW1,P62979,Q5RKT7	40S ribosomal protein S27a (Fragment)		12	7	5
A0A2R8Y849,A0A2R8YD14,E7ETK0,P62847,P62847-2,P62847-3,P62847-4	40S ribosomal protein S24	RPS24	13	9	2						RPS24	PE=1	SV=1
B3KX19,B4DZB1,Q15029,Q15029-2,Q15029-3,Q6IBM8	116 kDa U5 small nuclear ribonucleoprotein component		8	9	7
E9PKZ0,P62917	60S ribosomal protein L8 (Fragment)	RPL8	13	8	3						RPL8	PE=1	SV=1
O15061	Synemin	SYNM	6	11	7						SYNM	PE=1	SV=2
P50914	60S ribosomal protein L14	RPL14	9	10	5						RPL14	PE=1	SV=4
P55081	Microfibrillar-associated protein 1	MFAP1	9	5	10						MFAP1	PE=1	SV=2
P62277	40S ribosomal protein S13	RPS13	9	12	3						RPS13	PE=1	SV=2
P68032	Actin, alpha cardiac muscle 1	ACTC1	10	7	7						ACTC1	PE=1	SV=1
Q5W009,Q96I25	Splicing factor 45	RBM17	8	7	9						RBM17	PE=2	SV=1
Q6NZY4	Zinc finger CCHC domain-containing protein 8	ZCCHC8	12	10	2						ZCCHC8	PE=1	SV=2
A0A0D9SF53,A0A0D9SFB3,A0A0D9SG12,A0A2R8Y4A4,A0A2R8YF78,A0A2R8YFS5,B5BTY4,F6S8Q4,O00571	RNA helicase	DDX3X	8	11	4						DDX3X	PE=1	SV=1
A0A5F9ZI21,D3DVA5,Q92974,Q92974-2,Q92974-3,V9GYM8	Guanine nucleotide exchange factor H1	ARHGEF2	8	6	9						ARHGEF2	PE=1	SV=1
A0A669KB05,A0A669KB62,C9JZR2,O60716,O60716-10,O60716-11,O60716-12,O60716-13,O60716-14,O60716-15,O60716-16,O60716-17,O60716-18,O60716-19,O60716-2,O60716-20,O60716-21,O60716-22,O60716-23,O60716-24,O60716-3,O60716-4,O60716-5,O60716-6,O60716-7,O60716-8,O60716-9,Q96FS1	Catenin delta-1	CTNND1	8	9	6						CTNND1	PE=1	SV=1
B4DTK7,E7ERS3,Q86VM9	cDNA FLJ61387, highly similar to Homo sapiens conserved nuclear protein NHN1 (NHN1), mRNA		15	8	0
D3DU92,H3BMM9,H3BTC0,H3BV80,Q15287,Q15287-2,Q15287-3	RNA-binding protein with serine-rich domain 1	RNPS1	12	10	1						RNPS1	PE=1	SV=1
E9PR30,P62861	40S ribosomal protein S30	FAU	5	15	3						FAU	PE=1	SV=1
P26368,P26368-2	Splicing factor U2AF 65 kDa subunit	U2AF2	12	6	5						U2AF2	PE=1	SV=4
P62258,V9HW98	14-3-3 protein epsilon	YWHAE	2	3	18						YWHAE	PE=1	SV=1
Q08211	ATP-dependent RNA helicase A	DHX9	13	9	1						DHX9	PE=1	SV=4
Q6PKG0	La-related protein 1	LARP1	13	5	5						LARP1	PE=1	SV=2
A0A2Z6ATB6,Q16643,Q16643-2,Q16643-3	Drebrin A	DBN1	6	2	14						DBN1	PE=2	SV=1
A8K964,Q9H307	Pinin		14	8	0
B4DYY5,F8W726,Q14157,Q14157-1,Q14157-3,Q14157-4,Q14157-5	cDNA FLJ55671, highly similar to Ubiquitin-associated protein 2-like		9	7	6
D3DPS3,Q3KQU3	Arginine/proline rich coiled-coil 1, isoform CRA_b	RPRC1	8	8	6						RPRC1	PE=3	SV=1
F8W930,Q9Y6M1,Q9Y6M1-1	Insulin-like growth factor 2 mRNA-binding protein 2	IGF2BP2	5	9	8						IGF2BP2	PE=1	SV=1
H0YKD8,H0YMF4,P46779,P46779-2,P46779-3,P46779-4,P46779-5	60S ribosomal protein L28	RPL28	8	10	4						RPL28	PE=1	SV=1
P46776	60S ribosomal protein L27a	RPL27A	10	11	1						RPL27A	PE=1	SV=2
Q709F0	Acyl-CoA dehydrogenase family member 11	ACAD11	0	0	22						ACAD11	PE=1	SV=3
Q9BY89	Uncharacterized protein KIAA1671	KIAA1671	12	5	5						KIAA1671	PE=1	SV=2
Q9Y3I0	RNA-splicing ligase RtcB homolog	RTCB	11	7	4						RTCB	PE=1	SV=1
A0A024R5B2,A0A0A0MRU9,A0A7I2YQR3,A8K2S4,A9CP04,E7ETY4,E9PC69,Q7KZI7-13,Q7KZI7-14,Q7KZI7-15,Q7KZI7-16	Non-specific serine/threonine protein kinase	MARK2	10	7	4						MARK2	PE=3	SV=1
A0A024R6H0,Q9P2I0	Cleavage and polyadenylation specificity factor subunit 2	CPSF2	9	6	6						CPSF2	PE=3	SV=1
A0A0S2Z4T1,B2R7C5,P25205,Q53HJ4	DNA helicase (Fragment)	MCM3	8	10	3						MCM3	PE=2	SV=1
A0A2R8Y5A6,A0A2R8Y7E6,A0A2R8Y7P6,A0A2R8YDM9,A0A5F9ZHH4,A0A5F9ZHW5,A0A5F9ZHX3,A0A5F9ZI57,H0YH87,V9GY86	Ataxin-2	ATXN2	7	7	7						ATXN2	PE=1	SV=1
A4D0V4,P47755,Q53GC7,Q53GE2	F-actin-capping protein subunit alpha	CAPZA2	6	9	6						CAPZA2	PE=2	SV=1
A8K4C8,P26373,Q6NZ55	60S ribosomal protein L13	RPL13	7	11	3						RPL13	PE=2	SV=1
O43290	U4/U6.U5 tri-snRNP-associated protein 1	SART1	8	5	8						SART1	PE=1	SV=1
Q9UMS4	Pre-mRNA-processing factor 19	PRPF19	12	7	2						PRPF19	PE=1	SV=1
Q9UQC2,Q9UQC2-2	GRB2-associated-binding protein 2	GAB2	8	8	5						GAB2	PE=1	SV=1
A0A024R0J9,A0A0A0MRA5,A8K3W4,A8K6U7,B7Z4B8,Q9BUJ2,Q9BUJ2-2,Q9BUJ2-4	Heterogeneous nuclear ribonucleoprotein U-like 1, isoform CRA_a	HNRPUL1	7	7	6						HNRPUL1	PE=4	SV=1
A0A024R233,A0A1B0GTW1,A0A2R8YDH4,A0A3B3ITE1,B7Z954,Q9UDY2,Q9UDY2-3,Q9UDY2-7	Tight junction protein 2 (Zona occludens 2), isoform CRA_a	TJP2	9	5	6						TJP2	PE=4	SV=1
A0A024R2Q4,A0A2R8YEM3,E7ENU7,E7EQV9,P61313	Ribosomal protein L15	RPL15	10	6	4						RPL15	PE=3	SV=1
A0A384ME37,P40429,Q53H34,Q5QTS3	60S ribosomal protein L13a		8	7	5
A0A5H1ZRQ3,P01834,Q0KKI6,Q5EFE6,Q6GMX0,Q6P5S8,Q6PIL8,Q6PJF2,Q7Z3Y4,Q8TCD0,V9HW34	Immunoglobulin kappa constant (Fragment)	IGKC	6	10	4						IGKC	PE=1	SV=1
O15511	Actin-related protein 2/3 complex subunit 5	ARPC5	10	4	6						ARPC5	PE=1	SV=3
P27635,X1WI28,X5D2T3	60S ribosomal protein L10	RPL10	8	7	5						RPL10	PE=1	SV=4
P42285	Exosome RNA helicase MTR4	MTREX	10	9	1						MTREX	PE=1	SV=3
P62906	60S ribosomal protein L10a	RPL10A	13	5	2						RPL10A	PE=1	SV=2
Q6IBU4,Q99470	SDF2 protein	SDF2	4	7	9						SDF2	PE=2	SV=1
Q86VQ1	Glucocorticoid-induced transcript 1 protein	GLCCI1	6	6	8						GLCCI1	PE=1	SV=1
A0A024QZD1,G3V203,H0YHA7,J3QQ67,Q07020,Q07020-2,Q0QEW2	Ribosomal protein L18, isoform CRA_c	RPL18	10	6	3						RPL18	PE=3	SV=1
A0A087X0X3,P52272,P52272-2	Heterogeneous nuclear ribonucleoprotein M	HNRNPM	7	11	1						HNRNPM	PE=1	SV=1
A0A2X0SF83,Q5T5U3	ARHGAP21 (Fragment)	ARHGAP21	8	7	4						ARHGAP21	PE=4	SV=1
D9YZV5,P09493-3,P09493-9	Tropomyosin 1 (Alpha) isoform 4	TPM1	5	4	10						TPM1	PE=3	SV=1
J3QQQ9,J3QQV1,J3QRC4,J3QRI7,P61254,Q6IBH6	KOW domain-containing protein		7	10	2
P59998,P59998-3	Actin-related protein 2/3 complex subunit 4	ARPC4	10	7	2						ARPC4	PE=1	SV=3
P62913,Q5VVD0	60S ribosomal protein L11	RPL11	5	11	3						RPL11	PE=1	SV=2
P85037	Forkhead box protein K1	FOXK1	7	10	2						FOXK1	PE=1	SV=1
Q53F18,Q5U5K4,Q86YM7	Homer 1 variant (Fragment)		10	6	3
Q6UN15-3	Isoform 3 of Pre-mRNA 3'-end-processing factor FIP1	FIP1L1	6	9	4						FIP1L1
Q9BWJ5	Splicing factor 3B subunit 5	SF3B5	6	9	4						SF3B5	PE=1	SV=1
V5YQL4	Adenosylhomocysteinase	FGFR2-AHCYL1	12	6	1						FGFR2-AHCYL1	PE=2	SV=1
A0A024R1X8,A0A0S2Z487,P14923	Junction plakoglobin	JUP	18	0	0						JUP	PE=3	SV=1
A0A0U4BW16	Non-muscle myosin heavy chain 9	MYH9	6	7	5						MYH9	PE=2	SV=1
A0A140VKH7,O00339,O00339-2,O00339-3	Testis tissue sperm-binding protein Li 94mP		5	10	3
A0A7I2YQG2,J3KTE4,J3QR09,P84098,Q53G49,Q8IWR8	60S ribosomal protein L19	RPL19	7	9	2						RPL19	PE=4	SV=1
B2R6S9,P30533	cDNA, FLJ93097, highly similar to Homo sapiens low density lipoprotein receptor-related protein associated protein 1 (LRPAP1), mRNA		6	5	7
C9JYQ9,H0Y8C2,Q6P5R6	60S ribosomal protein L22-like 1	RPL22L1	6	8	4						RPL22L1	PE=1	SV=1
H3BPE1,H3BQK9	Microtubule-actin cross-linking factor 1, isoforms 1/2/3/5	MACF1	8	5	5						MACF1	PE=1	SV=1
Q15365,Q53SS8	Poly(rC)-binding protein 1	PCBP1	7	8	3						PCBP1	PE=1	SV=2
Q9NSC5	Homer protein homolog 3	HOMER3	7	7	4						HOMER3	PE=1	SV=2
A0A023T787,Q9Y5S9,Q9Y5S9-2	RNA-binding protein 8A	RBM8	10	6	1						RBM8	PE=2	SV=1
A0A024R1K8,Q15459,Q15459-2	Splicing factor 3a, subunit 1, 120kDa, isoform CRA_a	SF3A1	9	4	4						SF3A1	PE=4	SV=1
A0A024R1V4,E4W6B6,P61353	60S ribosomal protein L27	RPL27	5	7	5						RPL27	PE=3	SV=1
A0A024RBS2,A8K4Z4,P05388,Q53HW2	60S acidic ribosomal protein P0	RPLP0	9	8	0						RPLP0	PE=3	SV=1
A0A0C4DGN6,Q59FC3,Q9Y2X7-3	ARF GTPase-activating protein GIT1	GIT1	6	6	5						GIT1	PE=1	SV=1
A0A0D9SF63,Q9BZK7	F-box-like/WD repeat-containing protein TBL1XR1	TBL1XR1	4	8	5						TBL1XR1	PE=1	SV=1
A0A0F7KYT8,A0A0F7L1S3,B4DXZ6,P51114	Fragile X mental retardation autosomal homolog variant p2K	FXR1	6	8	3						FXR1	PE=2	SV=1
A0A2R8YD58,E7EU96,P68400,Q2I0Y7,Q5U5J2	Casein kinase II subunit alpha	CSNK2A1	9	5	3						CSNK2A1	PE=1	SV=1
B4E0L0,F6VRR5,Q96DI9,Q9BY77	cDNA FLJ54030, highly similar to Polymerase delta-interacting protein 3		6	8	3
C9JNW5,C9JXB8,P83731,V9HW01	60S ribosomal protein L24	RPL24	6	10	1						RPL24	PE=1	SV=1
P13929	Beta-enolase	ENO3	6	4	7						ENO3	PE=1	SV=5
P47929	Galectin-7	LGALS7	17	0	0						LGALS7	PE=1	SV=2
P62314	Small nuclear ribonucleoprotein Sm D1	SNRPD1	6	7	4						SNRPD1	PE=1	SV=1
P67809,Q6PKI6	Y-box-binding protein 1	YBX1	5	8	4						YBX1	PE=1	SV=3
Q08554,Q08554-2,Q9HB00	Desmocollin-1	DSC1	10	5	2						DSC1	PE=1	SV=2
A0A024R228,B4DUQ1,P61978,P61978-2,P61978-3,Q5EC54	Heterogeneous nuclear ribonucleoprotein K	HNRPK	6	8	2						HNRPK	PE=4	SV=1
A0A024RCC9,A0A2U9QGI0,B4DS05,B7ZAK9,B7ZB83,C9J6D1,C9JZI7,E9PJJ2,E9PKT8,E9PNJ7,E9PNW0,E9PS34,Q99733,Q99733-2	Nucleosome assembly protein 1-like 4, isoform CRA_b	NAP1L4	5	6	5						NAP1L4	PE=3	SV=1
A0A7I2V430,A0A7I2V4F0,A0A7I2YQ77,A3RJH1,Q92499	ATP-dependent RNA helicase DDX1	DDX1	5	7	4						DDX1	PE=4	SV=1
A8K566,A8K7V1,B3KY12,B4DW90,Q12874	cDNA FLJ78246, highly similar to Homo sapiens splicing factor 3a, subunit 3, 60kDa (SF3A3), mRNA		6	5	5
P25705,P25705-2,V9HW26	ATP synthase subunit alpha, mitochondrial	ATP5F1A	6	6	4						ATP5F1A	PE=1	SV=1
Q14151	Scaffold attachment factor B2	SAFB2	8	4	4						SAFB2	PE=1	SV=1
Q15650	Activating signal cointegrator 1	TRIP4	7	7	2						TRIP4	PE=1	SV=4
Q5D862	Filaggrin-2	FLG2	14	1	1						FLG2	PE=1	SV=1
A0A024R7Y5,E5RHG8,Q15369	Elongin-C	TCEB1	5	7	3						TCEB1	PE=3	SV=1
A0A024RDB2,A8K6V7,Q9UN86-2	Ras-GTPase activating protein SH3 domain-binding protein 2, isoform CRA_b	G3BP2	6	6	3						G3BP2	PE=4	SV=1
A0A384MEJ3,E9PCY7,G8JLB6,P31943	Epididymis secretory sperm binding protein		6	5	4
O94906,O94906-2	Pre-mRNA-processing factor 6	PRPF6	6	4	5						PRPF6	PE=1	SV=1
P46783,Q59GE4	40S ribosomal protein S10	RPS10	7	6	2						RPS10	PE=1	SV=1
P63167,Q6FGH9	Dynein light chain 1, cytoplasmic	DYNLL1	7	5	3						DYNLL1	PE=1	SV=1
Q6UUV7,Q6UUV7-3	CREB-regulated transcription coactivator 3	CRTC3	5	8	2						CRTC3	PE=1	SV=2
Q8N8E3	Centrosomal protein of 112 kDa	CEP112	5	5	5						CEP112	PE=1	SV=2
A0A024R2G7,D3YTB1,F8W727,P62910	Ribosomal protein L32, isoform CRA_a	RPL32	5	5	4						RPL32	PE=3	SV=1
A0A024R566,A0A024R572,A0A024R588,A0A024R5D9,B4DJU4,B4DSE4,Q15637,Q15637-2,Q15637-3,Q15637-4,Q15637-6	Splicing factor 1	SF1	6	3	5						SF1	PE=3	SV=1
A0A024RAM4,P46821	Microtubule-associated protein 1B, isoform CRA_b	MAP1B	7	4	3						MAP1B	PE=4	SV=1
A0A024RAQ1,P16989	Cold shock domain protein A, isoform CRA_a	CSDA	6	6	2						CSDA	PE=4	SV=1
A0A024RB31,P14649	Myosin, light polypeptide 6B, alkali, smooth muscle and non-muscle, isoform CRA_a	MYL6B	4	5	5						MYL6B	PE=4	SV=1
A0A0S2Z491,A0A0S2Z4G7,A0A7I2YQC0,P06748,P06748-2	Nucleophosmin (Fragment)	NPM1	8	5	1						NPM1	PE=2	SV=1
A6H8W6,O43166,O43166-2,O43166-3	SIPA1L1 protein	SIPA1L1	6	5	3						SIPA1L1	PE=2	SV=1
B2R4R0,P62805,Q0VAS5	Histone H4	HIST1H4J	5	6	3						HIST1H4J	PE=2	SV=1
B4DNG2,B5BUE6,J3KTA4,P17844,P17844-2	DEAD box protein 5		5	9	0
B4DQ50	cDNA FLJ56823, highly similar to Protein-glutamine gamma-glutamyltransferase E		12	2	0
E7ET15,O15042,O15042-2	U2 snRNP-associated SURP motif-containing protein	U2SURP	6	4	4						U2SURP	PE=1	SV=1
P01861	Immunoglobulin heavy constant gamma 4	IGHG4	4	0	10						IGHG4	PE=1	SV=1
P61981	14-3-3 protein gamma	YWHAG	1	1	12						YWHAG	PE=1	SV=2
P62851	40S ribosomal protein S25	RPS25	6	6	2						RPS25	PE=1	SV=1
Q8N1N4	Keratin, type II cytoskeletal 78	KRT78	7	6	1						KRT78	PE=1	SV=2
Q9H4L5,Q9H4L5-3	Oxysterol-binding protein-related protein 3	OSBPL3	5	5	4						OSBPL3	PE=1	SV=1
A0A024R7C7,Q12906,Q12906-7	Interleukin enhancer binding factor 3, 90kDa, isoform CRA_d	ILF3	5	6	2						ILF3	PE=4	SV=1
A0A024R8R0,J3QQJ0,Q9UHR5,Q9UHR5-2	SAP30 binding protein, isoform CRA_a	SAP30BP	4	6	3						SAP30BP	PE=4	SV=1
A0A0K2BMD8,A0A1K0GXZ1,A0A1S5UZ39,A0A2R8Y7C0,A0A385HVY8,A0A385HVZ2,A0A385HW02,A0A385HW21,A0A385HW63,D1MGQ2,E1B2D1,E9M4D4,I1VZV6,P69905,Q4ZGM8,U6A216,V9H1D9	Mutant hemoglobin alpha 2 globin chain	HBA2	3	6	4						HBA2	PE=3	SV=1
A0A0S2Z3L2,P16615	P-type Ca(2+) transporter (Fragment)	ATP2A2	4	2	7						ATP2A2	PE=2	SV=1
A0A384NPH0,Q03252	Epididymis secretory sperm binding protein		0	0	13
B2R4D5,B4DM63,O15145,Q2LE71	Actin-related protein 2/3 complex subunit 3		6	4	3
B2R4W8,P62244	40S ribosomal protein S15a	hCG_1994130	7	3	3						hCG_1994130	PE=2	SV=1
B4DJI2,P28799	cDNA FLJ53342, highly similar to Granulins		4	1	8
P04406,P04406-2,V9HVZ4	Glyceraldehyde-3-phosphate dehydrogenase	GAPDH	11	2	0						GAPDH	PE=1	SV=3
P61964	WD repeat-containing protein 5	WDR5	4	7	2						WDR5	PE=1	SV=1
Q04695	Keratin, type I cytoskeletal 17	KRT17	6	7	0						KRT17	PE=1	SV=2
Q8N163	Cell cycle and apoptosis regulator protein 2	CCAR2	5	7	1						CCAR2	PE=1	SV=2
Q8WUJ3	Cell migration-inducing and hyaluronan-binding protein	CEMIP	5	5	3						CEMIP	PE=1	SV=2
Q96N67,Q96N67-2,Q96N67-3,Q96N67-4,Q96N67-5,Q96N67-6	Dedicator of cytokinesis protein 7	DOCK7	6	6	1						DOCK7	PE=1	SV=4
Q9P2Q2	FERM domain-containing protein 4A	FRMD4A	5	4	4						FRMD4A	PE=1	SV=3
Q9Y5B9	FACT complex subunit SPT16	SUPT16H	6	6	1						SUPT16H	PE=1	SV=1
A0A024QZZ7,A0A024RCJ9,A0A024RCL8,A8K9J7,B2R4S9,B4DR52,I6L9F7,O60814,P57053,P58876,P62807,Q0D2M2,Q5QNW6,Q5QNW6-2,Q93079,Q99877,Q99879,Q99880,U3KQK0	Histone H2B	HIST1H2BD	6	5	1						HIST1H2BD	PE=3	SV=1
A0A024R5Z7,H0YMW4,P07355,P07355-2	Annexin	ANXA2	7	4	1						ANXA2	PE=2	SV=1
A0A024R8S5,B4DLN6,B4DUA5,H7BZ94,P07237	Protein disulfide-isomerase	P4HB	4	7	1						P4HB	PE=2	SV=1
A0A024R8U5,J3KP15,J3QL05,Q01130,Q01130-2,Q53FN0,Q8NAK9	Serine/arginine-rich splicing factor 2	SFRS2	7	4	1						SFRS2	PE=3	SV=1
A0A024R9D3,E5RI99,P62888	60S ribosomal protein L30	RPL30	6	4	2						RPL30	PE=3	SV=1
A0A087X0I6,A0A7I2V550,B4DIB3,Q9P0L2,Q9P0L2-3,X5D2M4	Non-specific serine/threonine protein kinase	MARK1	3	6	3						MARK1	PE=1	SV=1
A4D275,O15143	Actin-related protein 2/3 complex subunit	ARPC1B	9	1	2						ARPC1B	PE=2	SV=1
A8K4H1,B4DR70,H3BPE7,P35637,P35637-2,Q13344,Q59H57,Q6IBQ5,Q8TBR3	cDNA FLJ78268, highly similar to Homo sapiens fusion (involved in t(12;16) in malignant liposarcoma), transcript variant 1, mRNA		3	6	3
B2CIS9,P31944	Caspase 14, apoptosis-related cysteine peptidase	CASP14	10	2	0						CASP14	PE=2	SV=1
B2RDW0,B4DJ51,P0DP23,P0DP24,P0DP25,Q9BRL5	cDNA, FLJ96792, highly similar to Homo sapiens calmodulin 2 (phosphorylase kinase, delta) (CALM2), mRNA		2	4	6
B4DUI5,P60174,P60174-3,Q53HE2,V9HWK1	Triosephosphate isomerase		10	0	2
B7Z3V1,P05023,P05023-3,P05023-4	Sodium/potassium-transporting ATPase subunit alpha (Fragment)		4	4	4
O75323	Protein NipSnap homolog 2	NIPSNAP2	5	5	2						NIPSNAP2	PE=1	SV=1
O75400,O75400-3	Pre-mRNA-processing factor 40 homolog A	PRPF40A	7	2	3						PRPF40A	PE=1	SV=2
P62273	40S ribosomal protein S29	RPS29	3	6	3						RPS29	PE=1	SV=2
P62318,P62318-2	Small nuclear ribonucleoprotein Sm D3	SNRPD3	6	3	3						SNRPD3	PE=1	SV=1
Q3MHD2,Q3MHD2-2	Protein LSM12 homolog	LSM12	4	5	3						LSM12	PE=1	SV=2
Q53ET0	CREB-regulated transcription coactivator 2	CRTC2	6	5	1						CRTC2	PE=1	SV=2
Q9Y2K2	Serine/threonine-protein kinase SIK3	SIK3	6	5	1						SIK3	PE=1	SV=4
A0A024R3X4,A0A7I2V2X6,A0A7I2YQK6,B7Z597,P10809	60 kDa chaperonin (Fragment)	HSPD1	5	5	1						HSPD1	PE=2	SV=1
A0A024R8U9,A0A1B2JLU7,E7D7X9,E7D7Y0,P32322,P32322-2,P32322-3	Pyrroline-5-carboxylate reductase	PYCR1	6	3	2						PYCR1	PE=3	SV=1
A0A024RAC0,Q86V48	Leucine zipper protein 1, isoform CRA_a	LUZP1	5	4	2						LUZP1	PE=4	SV=1
A0A024RC33,Q15555,Q15555-3,Q15555-4,Q15555-5	Microtubule-associated protein RP/EB family member 2	MAPRE2	4	5	2						MAPRE2	PE=3	SV=1
A0A024RCX8,Q9Y3C6	Peptidyl-prolyl cis-trans isomerase	PPIL1	5	3	3						PPIL1	PE=3	SV=1
A0A087WW77,Q15334	Lethal(2) giant larvae protein homolog 1	LLGL1	3	6	2						LLGL1	PE=1	SV=1
A0A0B4J1Z1,B4DEK2,C9JAB2,Q16629,Q16629-2,Q16629-3,Q16629-4,Q8NB80	Serine/arginine-rich-splicing factor 7	SRSF7	3	7	1						SRSF7	PE=1	SV=1
A0A0S2Z4Z0,Q96PK6	RNA binding motif protein 14 isoform 1 (Fragment)	RBM14	8	3	0						RBM14	PE=2	SV=1
A0A140VK00,P25311	Testicular tissue protein Li 227		11	0	0
A0A286YEX4,B7Z4T6,P08651,P08651-2,P08651-3,P08651-4,P08651-5,P08651-6,Q6FI30	Nuclear factor 1	NFIC	6	3	2						NFIC	PE=1	SV=1
A0A2Z4N5U1,A0A3B3IS55,B3KSG3,B4DQA3,B7Z4H1,O14639,O14639-2,O14639-3,O14639-5,O14639-6	AbLIM1		4	2	5
A0A7I2V4L7,B1ANR0,Q13310,Q13310-2,Q13310-3,Q6IQ30	Polyadenylate-binding protein 4	PABPC4	3	6	2						PABPC4	PE=4	SV=1
A8K9W7,P78347,P78347-2,P78347-3,P78347-4,Q499G6,X5D2J9,X5D939,X5DNP5,X5DR09	cDNA FLJ77440, highly similar to Homo sapiens general transcription factor II, i (GTF2I), transcript variant 2, mRNA		5	6	0
B2R4C0,B4DM74,M0R117,M0R1A7,M0R3D6,Q02543	60S ribosomal protein L18a		4	5	2
B4DQZ7,S4R3H4	cDNA FLJ50838, highly similar to Apoptotic chromatin condensation inducer in thenucleus (Fragment)		6	5	0
B4DZF2,D3DQV9,H0Y3P2,P78344,P78344-2,Q59G42	cDNA FLJ59571, highly similar to Eukaryotic translation initiation factor 4gamma 2		6	4	1
B4E0S6,O43143	RNA helicase		5	3	3
H7C2W9	60S ribosomal protein L31 (Fragment)	RPL31	3	6	2						RPL31	PE=1	SV=1
K7EMW2	Baculoviral IAP repeat-containing protein 5 (Fragment)	BIRC5	0	0	11						BIRC5	PE=1	SV=1
P02545-2	Isoform C of Prelamin-A/C	LMNA	7	1	3						LMNA
P49458	Signal recognition particle 9 kDa protein	SRP9	3	8	0						SRP9	PE=1	SV=2
Q13885	Tubulin beta-2A chain	TUBB2A	4	5	2						TUBB2A	PE=1	SV=1
Q14204	Cytoplasmic dynein 1 heavy chain 1	DYNC1H1	9	2	0						DYNC1H1	PE=1	SV=5
Q4G0J3,Q4G0J3-3	La-related protein 7	LARP7	4	6	1						LARP7	PE=1	SV=1
Q6N093	Uncharacterized protein DKFZp686I04196 (Fragment)	DKFZp686I04196	4	5	2						DKFZp686I04196	PE=2	SV=1
Q9NZT1	Calmodulin-like protein 5	CALML5	8	2	1						CALML5	PE=1	SV=2
A0A024QZ70,Q7L7X3	TAO kinase 1, isoform CRA_a	TAOK1	5	2	3						TAOK1	PE=4	SV=1
A0A024R0L6,M0R389,Q15102	Epididymis secretory sperm binding protein	PAFAH1B3	5	3	2						PAFAH1B3	PE=2	SV=1
A0A0D9SFG6,Q99418,Q99418-2	Cytohesin-2	CYTH2	4	5	1						CYTH2	PE=1	SV=1
A0A140VJG6,A7E2F7,Q9UDT6,Q9UDT6-2	Cytoplasmic linker 2, isoform CRA_b	CYLN2	5	4	1						CYLN2	PE=2	SV=1
A0A286YEY1,P01876,Q6MZW0,Q6N090,Q6N092,Q6ZW64,Q8NCL6,Q8WY24,Q96DK0,Q96K68,Q9UP60	Immunoglobulin heavy constant alpha 1 (Fragment)	IGHA1	4	6	0						IGHA1	PE=1	SV=1
A0A2R8Y6W8,A8K359,P19447	DNA excision repair protein ERCC-3	ERCC3	4	5	1						ERCC3	PE=1	SV=1
A0A2R8Y7R9,Q13136	Liprin-alpha-1 (Fragment)	PPFIA1	3	4	3						PPFIA1	PE=1	SV=1
A0A2X0SFJ0,O75962,O75962-4	Non-specific serine/threonine protein kinase (Fragment)	TRIO	3	5	2						TRIO	PE=3	SV=1
A8K517,P62266	40S ribosomal protein S23	RPS23	4	4	2						RPS23	PE=2	SV=1
A8K9A4,B2R5W2,B2R603,B4DY08,G3V4W0,P07910,P07910-2	cDNA FLJ75154, highly similar to Homo sapiens heterogeneous nuclear ribonucleoprotein C (C1/C2), mRNA		4	6	0
B3KRK2,Q9UJV9	RNA helicase	DDX41	7	3	0						DDX41	PE=2	SV=1
B4DJ39,O94842,O94842-2,O94842-3	TOX high mobility group box family member 4		4	5	1
B4DLD4,M0QXL5,M0R0P1,M0R299,M0R2Q4,P22087,Q96BS4	cDNA FLJ56738, highly similar to Fibrillarin		5	3	2
B4DPP6,F6KPG5,P02768,Q56G89	cDNA FLJ54371, highly similar to Serum albumin		3	4	3
B7Z2E2,Q53GR7,Q9UJS0,Q9UJS0-2	cDNA FLJ54671, highly similar to Calcium-binding mitochondrial carrier protein Aralar2		4	4	2
K7ERE3,P13646,P13646-3	Keratin, type I cytoskeletal 13	KRT13	4	2	4						KRT13	PE=1	SV=1
K7ES02,Q13867	Bleomycin hydrolase (Fragment)	BLMH	10	0	0						BLMH	PE=1	SV=1
P38159	RNA-binding motif protein, X chromosome	RBMX	3	6	1						RBMX	PE=1	SV=3
P63261	Actin, cytoplasmic 2	ACTG1	4	4	2						ACTG1	PE=1	SV=1
P82912,P82912-2,Q53FX9,Q53GJ8	28S ribosomal protein S11, mitochondrial	MRPS11	2	8	0						MRPS11	PE=1	SV=2
Q9C0J8	pre-mRNA 3' end processing protein WDR33	WDR33	1	5	4						WDR33	PE=1	SV=2
A0A023T6R1,Q96A72	Mago nashi protein	FLJ10292	4	5	0						FLJ10292	PE=2	SV=1
A0A024R0Z3,A8KA56,B3KY11,Q9BUQ8	RNA helicase	DDX23	6	1	2						DDX23	PE=4	SV=1
A0A024R326,A0A3B3ITT5,P47914,Q6IPI1	60S ribosomal protein L29	RPL29	4	3	2						RPL29	PE=1	SV=1
A0A024R608,P05386	Ribosomal protein, large, P1, isoform CRA_a	RPLP1	7	2	0						RPLP1	PE=3	SV=1
A0A024R7L5,A0A024R7L8,Q92900,Q92900-2	UPF1	UPF1	4	4	1						UPF1	PE=2	SV=1
A0A024RB14,P62854	40S ribosomal protein S26	RPS26	4	4	1						RPS26	PE=3	SV=1
A0A024RDR0,B7Z965,P09429,Q59GW1,Q5T7C4	High mobility group protein 1	HMGB1	2	5	2						HMGB1	PE=3	SV=1
A0A090N7X1,A0A090N7Y2,Q9UG63,Q9UG63-2	ATP-binding cassette, sub-family F (GCN20), member 2	ABCF2	2	4	3						ABCF2	PE=4	SV=1
A0A0A0MRJ0,B9EGA7,Q5VT25,Q5VT25-2,Q5VT25-3,Q5VT25-4,Q5VT25-5,Q5VT25-6,Q8IWQ7	Non-specific serine/threonine protein kinase	CDC42BPA	3	5	1						CDC42BPA	PE=1	SV=1
A0A0A0MRJ3,Q8NEY1,Q8NEY1-2,Q8NEY1-3,Q8NEY1-4,Q8NEY1-7	Neuron navigator 1	NAV1	3	5	1						NAV1	PE=1	SV=1
A0A0U1RRM4,A0A7I2V621,A6NLN1,P26599,P26599-2,P26599-3	Polypyrimidine tract-binding protein 1	PTBP1	4	4	1						PTBP1	PE=1	SV=1
A0A1U9X609,H0YGW7,Q2L6I2,Q59F96,Q5STZ8,Q8NE71,Q8NE71-2	ABCF1		3	4	2
A0A2X0TVY0,C9JME2,Q9Y4F1,Q9Y4F1-2	FARP1 (Fragment)	FARP1	4	4	1						FARP1	PE=4	SV=1
A0A384NL58,A0A7I2V323,A0A7I2V3P1,A0A7I2V4N1,P22626,P22626-2	Heterogeneous nuclear ribonucleoproteins A2/B1		0	6	3
A0A590UJJ6,B2R4P9,B2R6Y1,B4DEB1,B4E380,K7EK07,K7EMV3,K7ES00,P68431,P84243,Q16695,Q71DI3	Histone H3	H3-3A	3	4	2						H3-3A	PE=1	SV=1
A6NDY9,P21333,P21333-2,Q60FE5,Q60FE6	Filamin A	FLNA	4	0	5						FLNA	PE=2	SV=4
A8MUS3,H7BY10,K7ERT8,P62750	60S ribosomal protein L23a	RPL23A	4	4	1						RPL23A	PE=1	SV=1
B0QYK0,Q01844,Q01844-3,Q01844-5,Q01844-6	RNA-binding protein EWS	EWSR1	3	5	1						EWSR1	PE=1	SV=1
D3DRX6,P33176,V9HW29	Kinesin-like protein	KIF5B	3	4	2						KIF5B	PE=3	SV=1
H3BPS8,H3BQN4,H3BUH7,J3KPS3,P04075,P04075-2,V9HWN7	Fructose-bisphosphate aldolase (Fragment)	ALDOA	3	2	4						ALDOA	PE=1	SV=1
I6L9E8,Q8NCA5	Family with sequence similarity 98, member A	FAM98A	3	1	5						FAM98A	PE=2	SV=1
K7ERI7,P35268,Q7Z4W8	60S ribosomal protein L22	RPL22	4	3	2						RPL22	PE=1	SV=1
O94964-2	Isoform 2 of Protein SOGA1	SOGA1	5	3	1						SOGA1
O95639	Cleavage and polyadenylation specificity factor subunit 4	CPSF4	1	5	3						CPSF4	PE=1	SV=1
P06576,Q0QEN7,V9HW31	ATP synthase subunit beta, mitochondrial	ATP5F1B	3	4	2						ATP5F1B	PE=1	SV=3
P06732	Creatine kinase M-type	CKM	3	1	5						CKM	PE=1	SV=2
P09661,Q53G21,Q53G61	U2 small nuclear ribonucleoprotein A'	SNRPA1	4	3	2						SNRPA1	PE=1	SV=2
P12236,Q6I9V5	ADP/ATP translocase 3	SLC25A6	4	2	3						SLC25A6	PE=1	SV=4
P30050	60S ribosomal protein L12	RPL12	3	4	2						RPL12	PE=1	SV=1
Q14011,Q53XX5	Cold-inducible RNA-binding protein	CIRBP	2	7	0						CIRBP	PE=1	SV=1
Q6MZV7,Q6PYX1	Uncharacterized protein DKFZp686C11235	DKFZp686C11235	3	6	0						DKFZp686C11235	PE=1	SV=1
Q9H089	Large subunit GTPase 1 homolog	LSG1	3	2	4						LSG1	PE=1	SV=2
Q9H2W6	39S ribosomal protein L46, mitochondrial	MRPL46	3	2	4						MRPL46	PE=1	SV=1
Q9NWH9	SAFB-like transcription modulator	SLTM	4	3	2						SLTM	PE=1	SV=2
A0A024R2X2,Q92551	Kinase	IHPK1	4	2	2						IHPK1	PE=3	SV=1
A0A024RAS2,A3KPC7,A4FTV9,B2R5B3,P0C0S8,Q16777,Q6FI13,Q96KK5,Q99878,Q9BTM1	Histone H2A	H2AFJ	3	4	1						H2AFJ	PE=3	SV=1
A0A024RBE8,A0A024RBH9,B2RE88,F8VVM2,Q00325,Q00325-2,Q53HC3,Q8NCF7	Solute carrier family 25 (Mitochondrial carrier phosphate carrier), member 3, isoform CRA_a	SLC25A3	3	2	3						SLC25A3	PE=2	SV=1
A0A087X1A5,A8K622,O95793,O95793-2,O95793-3,Q59F99	Double-stranded RNA-binding protein Staufen homolog 1	STAU1	3	1	4						STAU1	PE=1	SV=1
A0A087X2D0,B2R6F3,P84103,P84103-2	Serine/arginine-rich-splicing factor 3	SRSF3	5	1	2						SRSF3	PE=1	SV=1
A0A0A0MRF6,Q99996,Q99996-3,Q99996-6	A-kinase anchor protein 9	AKAP9	5	3	0						AKAP9	PE=1	SV=2
A0A0D9SEI3,A0A0D9SEN2,A0A0D9SER5,B4E3D9,P21127,P21127-2,P21127-3,P21127-8,Q5QPR3,Q9UQ88,Q9UQ88-2,Q9UQ88-3,Q9UQ88-4	Cyclin-dependent kinase 11B	CDK11B	3	2	3						CDK11B	PE=1	SV=1
A0A0S2Z4A5,B2RBA6,C6EMX8,P33993	DNA replication licensing factor MCM7 (Fragment)	MCM7	4	3	1						MCM7	PE=2	SV=1
A0A0S2Z5F3,A0A384MDS4,B2RB52,E9PF19,Q8N2L6,Q9Y4P3	Transducin-like 2 isoform 1 (Fragment)	TBL2	4	4	0						TBL2	PE=2	SV=1
A0A1X7SBZ2,A0A5H1ZRQ2,Q59F66,Q92841,Q92841-1,Q92841-2,Q92841-3	RNA helicase	DDX17	1	5	2						DDX17	PE=1	SV=1
A0A286YF22,A0A286YFA2,B3KSC3,O43175,V9HW79	D-3-phosphoglycerate dehydrogenase	PHGDH	4	3	1						PHGDH	PE=1	SV=1
A0A4W9A917,P01860,Q5EBM2,Q6N030,Q86TT2	Immunoglobulin heavy constant gamma 3 (Fragment)	IGHG3	1	0	7						IGHG3	PE=1	SV=1
A0MNP2,Q96DI7,Q96DI7-2	CDW11/WDR57	WDR57	3	3	2						WDR57	PE=2	SV=1
A2RUF6,Q9ULE3	DENN/MADD domain containing 2A	DENND2A	4	3	1						DENND2A	PE=2	SV=1
B2R791,B4DLS8,B4DM28,O43395,Q53GV6	Pre-mRNA-splicing factor 3		4	3	1
B2R7B5,B4DDX2,B4E043,Q07666,Q07666-2	cDNA, FLJ93365, highly similar to Homo sapiens KH domain containing, RNA binding, signal transduction associated 1 (KHDRBS1), mRNA		3	4	1
B4DLQ0,B4E2D6,I3L2N2,O14641	cDNA FLJ50985, highly similar to Segment polarity protein dishevelled homologDVL-2		1	2	5
E7EQ64,H0Y8D1,P07477,Q45KI0,Q53ZX7,Q53ZX8,Q53ZX9,Q86W17	Trypsin-1	PRSS1	3	3	2						PRSS1	PE=1	SV=1
E9PSG0,O75052,O75052-3	Carboxyl-terminal PDZ ligand of neuronal nitric oxide synthase protein	NOS1AP	3	4	1						NOS1AP	PE=1	SV=1
J3KPP4,O95232,Q86Y74	Cisplatin resistance-associated overexpressed protein, isoform CRA_b	LUC7L3	3	3	2						LUC7L3	PE=1	SV=1
J3KTL2,Q07955	Serine/arginine-rich splicing factor 1	SRSF1	4	4	0						SRSF1	PE=1	SV=1
K7EPT8	Glial fibrillary acidic protein (Fragment)	GFAP	5	1	2						GFAP	PE=1	SV=2
O75616	GTPase Era, mitochondrial	ERAL1	3	3	2						ERAL1	PE=1	SV=2
P04843,Q53EP4,Q6IBR0	Dolichyl-diphosphooligosaccharide--protein glycosyltransferase subunit 1	RPN1	5	3	0						RPN1	PE=1	SV=1
P16403	Histone H1.2	H1-2	2	3	3						H1-2	PE=1	SV=2
P22695	Cytochrome b-c1 complex subunit 2, mitochondrial	UQCRC2	1	6	1						UQCRC2	PE=1	SV=3
P25398	40S ribosomal protein S12	RPS12	4	1	3						RPS12	PE=1	SV=3
P55735	Protein SEC13 homolog	SEC13	3	3	2						SEC13	PE=1	SV=3
Q2NKY5	Tubulin beta chain	TUBB6	3	2	3						TUBB6	PE=2	SV=1
Q5JSZ5	Protein PRRC2B	PRRC2B	2	5	1						PRRC2B	PE=1	SV=2
Q8TED9	Actin filament-associated protein 1-like 1	AFAP1L1	4	2	2						AFAP1L1	PE=1	SV=2
Q92784,Q92784-2,Q92784-4	Zinc finger protein DPF3	DPF3	3	5	0						DPF3	PE=1	SV=3
Q9HCD5	Nuclear receptor coactivator 5	NCOA5	2	4	2						NCOA5	PE=1	SV=2
A0A024R1X0,O15234	Protein CASC3	CASC3	4	2	1						CASC3	PE=3	SV=1
A0A024RC65,A4QPB0,P46940	HCG1991735, isoform CRA_a	hCG_1991735	3	0	4						hCG_1991735	PE=4	SV=1
A0A024RD78,Q6P1L8	Mitochondrial ribosomal protein L14, isoform CRA_b	MRPL14	1	4	2						MRPL14	PE=3	SV=1
A0A024RDV4,Q9Y3M8	START domain containing 13, isoform CRA_a	STARD13	2	4	1						STARD13	PE=4	SV=1
A0A087X1U1,B2RZG9,E7EUN2,F5GXM9,Q9UPQ3,Q9UPQ3-2	Arf-GAP with GTPase, ANK repeat and PH domain-containing protein 1	AGAP1	1	4	2						AGAP1	PE=1	SV=1
A0A0D9SEY1,H7C0P6,O95819,O95819-3,Q53TX8	Mitogen-activated protein kinase kinase kinase kinase 4	MAP4K4	2	2	3						MAP4K4	PE=1	SV=1
A0A0S2Z4Y5,H0Y368,O60762,Q5QPK2	Dolichol-phosphate mannosyltransferase subunit 1 (Fragment)	DPM1	4	3	0						DPM1	PE=2	SV=1
A0A0U3FYV6,B2R6J0,P48431	SRY (Sex determining region Y)-box 2	SOX2	4	0	3						SOX2	PE=4	SV=1
A0A2X0SF55,Q12802,Q12802-2,Q12802-4	AKAP13 (Fragment)	AKAP13	5	1	1						AKAP13	PE=4	SV=1
A6H8V1	Slit homolog 1 (Drosophila)	SLIT1	3	4	0						SLIT1	PE=2	SV=1
A8K588,Q13247,Q13247-3,V9HVZ0	cDNA FLJ76823, highly similar to Homo sapiens splicing factor, arginine/serine-rich 6 (SFRS6), mRNA		3	4	0
A8K6G9,B4DET0,Q92620	RNA helicase		3	3	1
B2R4M6,P06702	Protein S100		2	4	1
B2RDQ3,P62995,P62995-3,Q59GA1,Q68DZ9,Q8N1H4	cDNA, FLJ96718, highly similar to Homo sapiens splicing factor, arginine/serine-rich 10 (transformer 2 homolog, Drosophila) (SFRS10), mRNA		3	2	2
B2RDT8,Q9Y5X2	cDNA, FLJ96764, highly similar to Homo sapiens sorting nexin 8 (SNX8), mRNA		3	3	1
B4DF70,P32119,V9HW12	cDNA FLJ60461, highly similar to Peroxiredoxin-2		5	2	0
B4DIX0,Q13045,Q13045-2,Q13045-3	cDNA FLJ50778, highly similar to Protein flightless-1 homolog		1	3	3
B4E1T1	cDNA FLJ54081, highly similar to Keratin, type II cytoskeletal 5		4	3	0
B5MCX3,Q15019,Q15019-2	Septin-2	SEPTIN2	1	4	2						SEPTIN2	PE=1	SV=1
D0PNI1,P63104	Epididymis luminal protein 4	YWHAZ	0	0	7						YWHAZ	PE=2	SV=1
E7EVA0	Microtubule-associated protein	MAP4	2	5	0						MAP4	PE=1	SV=1
O00425	Insulin-like growth factor 2 mRNA-binding protein 3	IGF2BP3	1	5	1						IGF2BP3	PE=1	SV=2
P09012	U1 small nuclear ribonucleoprotein A	SNRPA	3	4	0						SNRPA	PE=1	SV=3
P17858	ATP-dependent 6-phosphofructokinase, liver type	PFKL	2	5	0						PFKL	PE=1	SV=6
P27348	14-3-3 protein theta	YWHAQ	0	0	7						YWHAQ	PE=1	SV=1
P33897	ATP-binding cassette sub-family D member 1	ABCD1	0	0	7						ABCD1	PE=1	SV=2
P53999,Q59G24,Q6IBA2	Activated RNA polymerase II transcriptional coactivator p15	SUB1	1	5	1						SUB1	PE=1	SV=3
P81605,P81605-2	Dermcidin	DCD	1	4	2						DCD	PE=1	SV=2
Q05DF2,Q15428	SF3A2 protein (Fragment)	SF3A2	6	1	0						SF3A2	PE=2	SV=1
Q13595,Q549U1	Transformer-2 protein homolog alpha	TRA2A	3	2	2						TRA2A	PE=1	SV=1
Q15545	Transcription initiation factor TFIID subunit 7	TAF7	2	2	3						TAF7	PE=1	SV=1
Q2NL82	Pre-rRNA-processing protein TSR1 homolog	TSR1	2	5	0						TSR1	PE=1	SV=1
Q69YN4,Q69YN4-2,Q69YN4-3,Q69YN4-4	Protein virilizer homolog	VIRMA	1	4	2						VIRMA	PE=1	SV=2
Q86V81	THO complex subunit 4	ALYREF	3	4	0						ALYREF	PE=1	SV=3
Q92626	Peroxidasin homolog	PXDN	3	4	0						PXDN	PE=1	SV=2
Q96NL6	Sodium channel and clathrin linker 1	SCLT1	0	0	7						SCLT1	PE=1	SV=2
Q9BRK4	Leucine zipper putative tumor suppressor 2	LZTS2	3	2	2						LZTS2	PE=1	SV=2
Q9NQ50	39S ribosomal protein L40, mitochondrial	MRPL40	4	1	2						MRPL40	PE=1	SV=1
Q9Y230	RuvB-like 2	RUVBL2	2	3	2						RUVBL2	PE=1	SV=3
Q9Y5B6,Q9Y5B6-2	PAX3- and PAX7-binding protein 1	PAXBP1	3	4	0						PAXBP1	PE=1	SV=2
A0A024R136,A0A2X0U4T9,B2RE34,F8VRD2,Q9H0H5	Rac GTPase activating protein 1, isoform CRA_a	RACGAP1	3	2	1						RACGAP1	PE=4	SV=1
A0A024R1I7,Q8N523,Q9UBB9	Tuftelin-interacting protein 11	TFIP11	3	3	0						TFIP11	PE=3	SV=1
A0A024R1K7,Q04917	Tyrosine 3-monooxygenase/tryptophan 5-monooxygenase activation protein, eta polypeptide, isoform CRA_b	YWHAH	0	0	6						YWHAH	PE=3	SV=1
A0A024R2L6,A0A0C4DG17,C9J9K3,P08865	40S ribosomal protein SA	RPSA	1	4	1						RPSA	PE=3	SV=1
A0A024R2W3,A0A0S2Z472,A8KAH7,P13861,P13861-2	Protein kinase cAMP-dependent regulatory type II alpha isoform 2 (Fragment)	PRKAR2A	2	2	2						PRKAR2A	PE=2	SV=1
A0A024R565,F5GX77,Q9UI30	Multifunctional methyltransferase subunit TRM112-like protein	HSPC152	1	5	0						HSPC152	PE=3	SV=1
A0A024R6D8,Q13243,Q13243-3,Q59EK7,Q86U32	Splicing factor, arginine/serine-rich 5, isoform CRA_a	SFRS5	3	2	1						SFRS5	PE=3	SV=1
A0A024RA24,B4DGE7,Q9NXC5,Q9NXC5-2	zinc_ribbon_16 domain-containing protein	FLJ20323	2	4	0						FLJ20323	PE=3	SV=1
A0A024RAC6	Elongin-A	ELOA	3	3	0						ELOA	PE=1	SV=1
A0A024RB22,Q8TAQ2	SWI/SNF related, matrix associated, actin dependent regulator of chromatin, subfamily c, member 2, isoform CRA_a	SMARCC2	3	3	0						SMARCC2	PE=4	SV=1
A0A075B730,P58107	Epiplakin	EPPK1	6	0	0						EPPK1	PE=1	SV=2
A0A087X0H9,Q5T8P6,Q5T8P6-2,Q5T8P6-3	RNA-binding protein 26	RBM26	4	0	2						RBM26	PE=1	SV=1
A0A087X253,A0A140VJE8,A8K0G3,A8K916,B4DWG4,H0UID3,H0UID4,H0UID5,P63010,P63010-2,P63010-3,Q68DI0	AP complex subunit beta	AP2B1	3	3	0						AP2B1	PE=1	SV=1
A0A0A0MQS2,B3KSZ8,F5H0Q6	CLK4-associating serine/arginine-rich protein	CLASRP	2	1	3						CLASRP	PE=1	SV=1
A0A1X7SBR1,A1LQZ3,Q7Z3G6	Prickle-like protein 2	PRICKLE2	2	4	0						PRICKLE2	PE=1	SV=1
A0A2Q3DQE3,A8K6N9,Q13555,Q13555-10,Q13555-11,Q13555-2,Q13555-3,Q13555-4,Q13555-5,Q13555-6,Q13555-7,Q13555-8,Q13555-9,Q5SWX3,Q8WU40	Calcium/calmodulin-dependent protein kinase	CAMK2G	4	2	0						CAMK2G	PE=1	SV=1
A0A384MEG1,B3KTA3,Q16658	Fascin		2	2	2
A0A384P5Q0,P04040	Catalase		5	1	0
A0A5H1ZRS1,B9EIS5,Q15154-5	Pericentriolar material 1 protein	PCM1	4	2	0						PCM1	PE=1	SV=1
A0MNN4,Q2TAY7	CDW3/SMU1	SMU1	4	2	0						SMU1	PE=2	SV=1
A1LUY1,P49207	60S ribosomal protein L34	RPL34	3	3	0						RPL34	PE=3	SV=1
A6PW57,Q99755-2,Q99755-3	Phosphatidylinositol 4-phosphate 5-kinase type-1 alpha	PIP5K1A	2	3	1						PIP5K1A	PE=1	SV=2
A8K4Z6,Q9BRD0	BUD13 homolog		1	3	2
B2R7W3,O75934,Q53HE3	Pre-mRNA-splicing factor SPF27	BCAS2	1	3	2						BCAS2	PE=2	SV=1
B2RAH5,O14974,O14974-3,O14974-4,O14974-5	Protein phosphatase 1 regulatory subunit		2	1	3
B2RCM6,Q5JZ02,Q96S44	Non-specific serine/threonine protein kinase		2	2	2
B4DW52	cDNA FLJ55253, highly similar to Actin, cytoplasmic 1		2	1	3
C9J4Z3,P61513	60S ribosomal protein L37a	RPL37A	2	3	1						RPL37A	PE=1	SV=1
C9JLI6,H0YMV8,Q71UM5	40S ribosomal protein S27	RPS27L	3	2	1						RPS27L	PE=1	SV=1
F5H702,Q96GC5,Q96GC5-3	39S ribosomal protein L48, mitochondrial	MRPL48	4	2	0						MRPL48	PE=1	SV=1
H3BQZ7,Q1KMD3	HCG2044799	HNRNPUL2-BSCL2	1	4	1						HNRNPUL2-BSCL2	PE=4	SV=1
J3KRG2,Q96QA5	Gasdermin-A (Fragment)	GSDMA	6	0	0						GSDMA	PE=1	SV=8
P04259	Keratin, type II cytoskeletal 6B	KRT6B	4	1	1						KRT6B	PE=1	SV=5
P26641,Q53YD7	Elongation factor 1-gamma	EEF1G	3	3	0						EEF1G	PE=1	SV=3
P62306	Small nuclear ribonucleoprotein F	SNRPF	2	4	0						SNRPF	PE=1	SV=1
Q05519,Q05519-2,Q05BU6,Q5T760,Q6PJB9,Q6PJY9,Q6PKC9	Serine/arginine-rich splicing factor 11	SRSF11	2	2	2						SRSF11	PE=1	SV=1
Q5T280	Putative methyltransferase C9orf114	SPOUT1	1	5	0						SPOUT1	PE=1	SV=3
Q6KB66,Q6KB66-2	Keratin, type II cytoskeletal 80	KRT80	6	0	0						KRT80	PE=1	SV=2
Q92522	Histone H1.10	H1-10	3	2	1						H1-10	PE=1	SV=1
Q92997,Q92997-2	Segment polarity protein dishevelled homolog DVL-3	DVL3	2	3	1						DVL3	PE=1	SV=2
Q96HS1	Serine/threonine-protein phosphatase PGAM5, mitochondrial	PGAM5	3	2	1						PGAM5	PE=1	SV=2
Q96PY5,Q96PY5-3	Formin-like protein 2	FMNL2	3	1	2						FMNL2	PE=1	SV=3
Q9NUL7	Probable ATP-dependent RNA helicase DDX28	DDX28	5	1	0						DDX28	PE=1	SV=2
A0A024QZN9,A0A024QZT0,A0A0A0MR02,P45880,P45880-1,P45880-2	Outer mitochondrial membrane protein porin 2	VDAC2	4	0	1						VDAC2	PE=3	SV=1
A0A024R1P7,A8K129,B4DIU6,B4E2A6,Q9UH99,Q9UH99-2,Q9UH99-3	Unc-84 homolog B (C. elegans), isoform CRA_b	UNC84B	2	2	1						UNC84B	PE=4	SV=1
A0A024R1S5,O00178	GTP-binding protein 1	GTPBP1	2	2	1						GTPBP1	PE=4	SV=1
A0A024R1X9,Q8TC04,Q9C075	Keratin 23 (Histone deacetylase inducible), isoform CRA_a	KRT23	4	1	0						KRT23	PE=3	SV=1
A0A024R2L1,Q8TAF3,Q8TAF3-3,Q8TAF3-4,Q8TAF3-5	USP1-associated factor 1	WDR48	2	2	1						WDR48	PE=2	SV=1
A0A024R868,B2R780,Q9UKU9	Angiopoietin-like 2, isoform CRA_a	ANGPTL2	3	1	1						ANGPTL2	PE=4	SV=1
A0A024R880,B2R9L6,B5BU53,P50750,P50750-2	Cyclin-dependent kinase 9 (CDC2-related kinase), isoform CRA_a	CDK9	1	4	0						CDK9	PE=3	SV=1
A0A024R8P8,P63173	60S ribosomal protein L38	RPL38	2	2	1						RPL38	PE=3	SV=1
A0A024R952,Q13835,Q13835-2	Plakophilin 1 (Ectodermal dysplasia/skin fragility syndrome), isoform CRA_a	PKP1	3	1	1						PKP1	PE=3	SV=1
A0A024RAQ9,P13611,Q59FG9	Chondroitin sulfate proteoglycan 2 (Versican), isoform CRA_b	CSPG2	2	1	2						CSPG2	PE=3	SV=1
A0A024RBB7,B7Z2V4,F5H4R6,F8VUX1,F8VXI6,F8VY35,F8W020,F8W0J6,P55209,P55209-2	Nucleosome assembly protein 1-like 1, isoform CRA_a	NAP1L1	2	2	1						NAP1L1	PE=3	SV=1
A0A087WTV6,A0A0S2Z5U6,Q96C36	Pyrroline-5-carboxylate reductase	PYCR2	2	3	0						PYCR2	PE=1	SV=1
A0A087WVV7,A0A087X165,A0A590UJ70,Q9C0H9,Q9C0H9-2	SRC kinase-signaling inhibitor 1 (Fragment)	SRCIN1	4	1	0						SRCIN1	PE=1	SV=1
A0A087WWP4,A0A494C001,A0A499FJY3,Q96T37,Q96T37-2,Q96T37-3,Q96T37-4	RNA-binding protein 15	RBM15	2	1	2						RBM15	PE=1	SV=1
A0A087WXX9,A0MZF5,B2RA25,P54646,Q13131,Q13131-2,Q96E92	5'-AMP-activated protein kinase catalytic subunit alpha-2	PRKAA2	3	1	1						PRKAA2	PE=1	SV=1
A0A0A0MRE5,H0YBF7,Q9ULH1,Q9ULH1-2	Arf-GAP with SH3 domain, ANK repeat and PH domain-containing protein 1	ASAP1	2	3	0						ASAP1	PE=1	SV=1
A0A0B4J296,A0A384MDL3,Q15370,Q15370-2	Elongin-B	ELOB	3	2	0						ELOB	PE=1	SV=1
A0A0C4DG89,A8K6X3,Q7L014	RNA helicase	DDX46	3	2	0						DDX46	PE=1	SV=1
A0A0S2Z4P0,P50479	PDZ and LIM domain 4 isoform 2 (Fragment)	PDLIM4	1	3	1						PDLIM4	PE=2	SV=1
A0A109NGN6,P28066	Proteasome subunit alpha type		4	1	0
A0A2X0SFF5,E9PMR6,Q9NZN5,Q9NZN5-2	ARHGEF12 (Fragment)	ARHGEF12	2	1	2						ARHGEF12	PE=4	SV=1
A0A494C0D1,A8K4W7,B2R8A1,B7Z438,P53597,Q6IAL5	Succinate--CoA ligase [ADP/GDP-forming] subunit alpha, mitochondrial	SUCLG1	2	2	1						SUCLG1	PE=1	SV=1
A0A494C0S1	GTP-binding protein Rit1	RIT1	3	2	0						RIT1	PE=1	SV=1
A0A7I2V5U5,G5E9E7	Tight junction protein ZO-1	TJP1	1	2	2						TJP1	PE=4	SV=1
A0N5G5	Rheumatoid factor D5 light chain (Fragment)	V-kappa-3	3	2	0						V-kappa-3	PE=2	SV=1
A2IDA3,P29372,P29372-2,P29372-4,P29372-5,Q1W6H1	3-methyladenine DNA glycosidase (Fragment)	MPG	3	1	1						MPG	PE=1	SV=1
A8K4I8,Q9BPW8	cDNA FLJ78131, highly similar to Homo sapiens nipsnap homolog 1 (C. elegans) (NIPSNAP1), mRNA		3	1	1
A8K6Q4,E9PGM9,P78332	cDNA FLJ76888, highly similar to Homo sapiens RNA binding motif protein 6 (RBM6), mRNA		1	3	1
A8K9L8,G5EA42,Q9NZR1	cDNA FLJ76964, highly similar to Homo sapiens tropomodulin 2 (neuronal) (TMOD2), mRNA		2	1	2
B2RAR6,D3DWK1,E9PRY8,P29692,P29692-2	cDNA, FLJ95068, highly similar to Homo sapiens eukaryotic translation elongation factor 1 delta (guanine nucleotide exchange protein) (EEF1D), transcript variant 1, mRNA		2	2	1
B2RN10,I3L2J8,Q9UPN4,Q9UPN4-2,Q9UPN4-3	5-azacytidine induced 1	AZI1	1	1	3						AZI1	PE=2	SV=1
B3KUJ5,Q92769,Q92769-3	Histone deacetylase		1	2	2
B4DJ75,P62140,V9HW04	Serine/threonine-protein phosphatase		3	1	1
B4DLN1,P52815	cDNA FLJ60124, highly similar to Mitochondrial dicarboxylate carrier		2	3	0
B4DWW8,E7EVX8,Q8WWY3,Q8WWY3-4	Pre-mRNA-processing factor 31		3	1	1
B4DZP5,B7Z2A1,F5GY55,Q16531	DNA damage-binding protein 1		2	3	0
B7Z5C8,Q5SQI0,Q5SQI0-3,Q5SQI0-4,Q5SQI0-5,Q5SQI0-6,Q5SQI0-7	Alpha-tubulin N-acetyltransferase 1	ATAT1	3	2	0						ATAT1	PE=2	SV=1
B9EG90,P11387	DNA topoisomerase I	TOP1	2	2	1						TOP1	PE=2	SV=1
E9PHV5,P28290,P28290-3	Protein ITPRID2	ITPRID2	3	1	1						ITPRID2	PE=1	SV=1
F8W0Q9,Q8NEY8,Q8NEY8-2,Q8NEY8-8,Q8NEY8-9	Periphilin-1	PPHLN1	1	0	4						PPHLN1	PE=1	SV=1
H0YLA2,P37108	Signal recognition particle 14 kDa protein	SRP14	3	2	0						SRP14	PE=1	SV=1
J3KPH8,Q8WUI4,Q8WUI4-10,Q8WUI4-3,Q8WUI4-4,Q8WUI4-5,Q8WUI4-6,Q8WUI4-7,Q8WUI4-8	Histone deacetylase	HDAC7	3	0	2						HDAC7	PE=1	SV=1
J3QSB5,Q9Y3U8	60S ribosomal protein L36	RPL36	2	2	1						RPL36	PE=1	SV=1
K9JA46,P07900,P07900-2	Epididymis luminal secretory protein 52	EL52	3	1	1						EL52	PE=2	SV=1
M0QY97,Q9UPT8	Zinc finger CCCH domain-containing protein 4 (Fragment)	ZC3H4	2	2	1						ZC3H4	PE=1	SV=1
N0E4C7,P67870,Q5SRQ3,Q5SRQ6	Casein kinase II subunit beta	CSNK2B	3	2	0						CSNK2B	PE=2	SV=1
O43920,Q6IBA0	NADH dehydrogenase [ubiquinone] iron-sulfur protein 5	NDUFS5	1	2	2						NDUFS5	PE=1	SV=3
O95782,O95782-2	AP-2 complex subunit alpha-1	AP2A1	2	3	0						AP2A1	PE=1	SV=3
P07814	Bifunctional glutamate/proline--tRNA ligase	EPRS1	3	2	0						EPRS1	PE=1	SV=5
P07919,Q567R0	Cytochrome b-c1 complex subunit 6, mitochondrial	UQCRH	3	2	0						UQCRH	PE=1	SV=2
P50749	Ras association domain-containing protein 2	RASSF2	1	4	0						RASSF2	PE=1	SV=1
P62316	Small nuclear ribonucleoprotein Sm D2	SNRPD2	1	2	2						SNRPD2	PE=1	SV=1
P83111	Serine beta-lactamase-like protein LACTB, mitochondrial	LACTB	0	0	5						LACTB	PE=1	SV=2
Q05D20,Q6P0P7,Q6PJV4,Q7Z5U1	THRAP3 protein (Fragment)	THRAP3	2	1	2						THRAP3	PE=2	SV=1
Q15643,Q15643-2	Thyroid receptor-interacting protein 11	TRIP11	0	0	5						TRIP11	PE=1	SV=3
Q53F02,Q9UKF6	Cleavage and polyadenylation specific factor 3, 73kDa variant (Fragment)		3	2	0
Q7Z417	Nuclear fragile X mental retardation-interacting protein 2	NUFIP2	3	1	1						NUFIP2	PE=1	SV=1
Q8TF42	Ubiquitin-associated and SH3 domain-containing protein B	UBASH3B	2	2	1						UBASH3B	PE=1	SV=2
Q96G25,Q96G25-2,Q96G25-3	Mediator of RNA polymerase II transcription subunit 8	MED8	3	2	0						MED8	PE=1	SV=2
Q9GZN8,Q9GZN8-2	UPF0687 protein C20orf27	C20orf27	2	1	2						C20orf27	PE=1	SV=3
Q9NVI7-2	Isoform 2 of ATPase family AAA domain-containing protein 3A	ATAD3A	1	3	1						ATAD3A
Q9NZB2,Q9NZB2-4,Q9NZB2-6	Constitutive coactivator of PPAR-gamma-like protein 1	FAM120A	2	2	1						FAM120A	PE=1	SV=2
Q9Y3Y2,Q9Y3Y2-3,Q9Y3Y2-4,X6R700	Chromatin target of PRMT1 protein	CHTOP	4	1	0						CHTOP	PE=1	SV=2
A0A024QZC1,O95400	CD2 antigen (Cytoplasmic tail) binding protein 2, isoform CRA_a	CD2BP2	1	2	1						CD2BP2	PE=2	SV=1
A0A024R1K9,B8ZZ19,H0Y3U0,P20472	Parvalbumin, isoform CRA_a	PVALB	2	1	1						PVALB	PE=3	SV=1
A0A024R1N4,B1AHC9,B4DE32,P12956,P12956-2	ATP-dependent DNA helicase 2 subunit 1	XRCC6	2	1	1						XRCC6	PE=3	SV=1
A0A024R333,Q6UXN9	Transmembrane protein 113, isoform CRA_a	TMEM113	2	1	1						TMEM113	PE=3	SV=1
A0A024R4F1,P06733	2-phospho-D-glycerate hydro-lyase	HEL-S-17	3	0	1						HEL-S-17	PE=2	SV=1
A0A024R6I3,P49755,Q53GF9	Testicular tissue protein Li 206	TMED10	3	0	1						TMED10	PE=2	SV=1
A0A024R9T6,Q9P270	HCG17415, isoform CRA_a	SLAIN2	1	2	1						SLAIN2	PE=2	SV=1
A0A024RD56,B3KT40,Q5JTD0,Q5JTD0-2,Q5JTD0-4	Tight junction associated protein 1 (Peripheral), isoform CRA_a	TJAP1	2	0	2						TJAP1	PE=4	SV=1
A0A075B6Z2,A0N4V7	T cell receptor alpha joining 56 (Fragment)	TRAJ56	3	0	1						TRAJ56	PE=4	SV=1
A0A090N7V5,B8ZZK2,O75223	Gamma-glutamylcyclotransferase	C7orf24	4	0	0						C7orf24	PE=4	SV=1
A0A0A0MSI0,A0A384NPQ2,B2R4P2,Q06830	Peroxiredoxin-1 (Fragment)	PRDX1	2	2	0						PRDX1	PE=1	SV=1
A0A0D9SF60,Q4W5T8,Q99569,Q99569-2	Plakophilin-4	PKP4	3	1	0						PKP4	PE=1	SV=1
A0A0K0K1K4,O14818,Q05DH1	Proteasome subunit alpha type	HEL-S-276	4	0	0						HEL-S-276	PE=2	SV=1
A0A140VJW5,D3DP78,P14868,P14868-2	Aspartate--tRNA ligase, cytoplasmic		2	1	1
A0A140VKA0,B7Z6G4,E7EX44,Q05682,Q05682-2,Q05682-3,Q05682-4,Q05682-5,Q05682-6	Caldesmon 1, isoform CRA_i	CALD1	2	1	1						CALD1	PE=2	SV=1
A0A1B0GTN9,E9PIK1,E9PKC0,Q6IQ23,Q6IQ23-2	Pleckstrin homology domain-containing family A member 7 (Fragment)	PLEKHA7	0	0	4						PLEKHA7	PE=1	SV=1
A0A1B1RVA9,A8K2M5,B3KRV7,B7Z4C6,P06858,Q53HW6,Q6IAV0	Lipoprotein lipase	LPL	2	0	2						LPL	PE=3	SV=1
A0A1U9X972,A0A1U9X974,A0A1U9X975,A0A1U9X977,A0A1U9X982,A0A1U9X985,A0A1U9X987,A0A1U9X988,A0A1U9X993,A0A1U9X996,A0A1U9X998,A0A1U9X999,A0A1U9X9A5,A0A1U9X9A9,P48634,P48634-2,P48634-3	PRRC2A		1	3	0
A0A384MTR5,B5BUB1,Q9Y265	RuvB-like helicase		2	1	1
A0A3B3IT15,P53621,P53621-2	Coatomer subunit alpha	COPA	2	1	1						COPA	PE=1	SV=1
A0A5C2G3T4	IGL c3958_light_IGKV3-20_IGKJ1 (Fragment)		1	3	0
A0A5F9ZHY7,Q8WY22	BRI3-binding protein	BRI3BP	0	0	4						BRI3BP	PE=1	SV=1
A0A669KAW3,A0A669KBB4,A0A669KBK2,B2R6K0,H0Y818,P40692,P40692-3,Q53GX1,Q59EG3,Q5GJ64	DNA mismatch repair protein Mlh1 (Fragment)	MLH1	2	2	0						MLH1	PE=1	SV=1
A0A6I8PUE4	Adhesion G protein-coupled receptor L2	ADGRL2	3	1	0						ADGRL2	PE=1	SV=1
A0A7I2V2F2,A0A7I2V309,B2R8Z8,O60506,O60506-2	Heterogeneous nuclear ribonucleoprotein Q	SYNCRIP	1	3	0						SYNCRIP	PE=4	SV=1
A0A7I2V4I5,Q5T200	Zinc finger CCCH domain-containing protein 13	ZC3H13	1	3	0						ZC3H13	PE=4	SV=1
A4D1N4,C9JRZ6,F8WAR4,Q9NX63	Coiled-coil-helix-coiled-coil-helix domain containing 3	CHCHD3	2	1	1						CHCHD3	PE=4	SV=1
A8K486,B2RE56,B4DM82,P62937,V9HWF5	Peptidyl-prolyl cis-trans isomerase		0	2	2
A8K9B9	cDNA FLJ77391, highly similar to Homo sapiens EH-domain containing 4 (EHD4), mRNA		2	2	0
B3KMC9,Q9H0D6	5'-3' exoribonuclease		2	2	0
B3KRR4,Q32Q83,Q6P392,Q8WUA2	Peptidyl-prolyl cis-trans isomerase		2	2	0
B3KUJ0,Q15427,Q53FG6	cDNA FLJ39996 fis, clone STOMA2002166, highly similar to Splicing factor 3B subunit 4		2	1	1
B4DDI0,D3DQ79,H7BXY5,Q0ZGT2,Q0ZGT2-2,Q0ZGT2-3,Q0ZGT2-4	cDNA FLJ55951, highly similar to Homo sapiens nexilin (F actin binding protein) (NEXN), mRNA		0	0	4
B4DH29,B4DHJ3,B4DR40,C9J2Y9,C9J4M6,P30876	DNA-directed RNA polymerase subunit beta		2	1	1
B4DIJ9,P48730-2	Non-specific serine/threonine protein kinase		2	1	1
B4DJT6	cDNA FLJ59911, moderately similar to Death domain-containing protein CRADD		2	1	1
B4DVR4	cDNA FLJ60912, highly similar to Vinexin		2	0	2
B4DVS0,P14678,P14678-2,Q5XPV6,Q66K91	Small nuclear ribonucleoprotein-associated protein	SNRPB	0	2	2						SNRPB	PE=2	SV=1
B4DXB9,M0QWZ7,M0R2C6,Q9NP81	Seryl-tRNA synthetase		3	1	0
B4DY09,F4ZW62,Q12905,Q53FG3	Interleukin enhancer-binding factor 2	ILF2	1	3	0						ILF2	PE=1	SV=1
B7Z5S1,Q9NTI5,Q9NTI5-2	cDNA FLJ61699, highly similar to Homo sapiens androgen-induced proliferation inhibitor (APRIN), transcript variant 1, mRNA		1	2	1
B9EGI2	Myosin phosphatase Rho interacting protein	MPRIP	1	2	1						MPRIP	PE=2	SV=1
D3DTH7	Myosin IC, isoform CRA_a	MYO1C	2	1	1						MYO1C	PE=3	SV=1
E5KNY5,P42704	Leucine-rich PPR-motif containing	LRPPRC	3	1	0						LRPPRC	PE=4	SV=1
E7EPC8,Q9UQB3,Q9UQB3-2	Catenin delta-2	CTNND2	1	3	0						CTNND2	PE=1	SV=1
E9PP16,Q8ND30,Q8ND30-2,Q8ND30-3	Liprin-beta-2	PPFIBP2	2	1	1						PPFIBP2	PE=1	SV=1
F5GXY2	L-lactate dehydrogenase A chain (Fragment)	LDHA	3	1	0						LDHA	PE=1	SV=8
G0XQ39,Q13586,V5J3L2	STIM1L	STIM1	1	1	2						STIM1	PE=1	SV=1
H6VRG2	Cytokeratin-1	KRT1	2	1	1						KRT1	PE=3	SV=1
H7BXY3,Q7L2E3,Q7L2E3-2,Q7L2E3-3	RNA helicase	DHX30	2	1	1						DHX30	PE=1	SV=1
J3KRN4,J3QRB6,Q1PBM3,Q96HN9,Q99759,Q99759-2	Mitogen-activated protein kinase kinase kinase 3	MAP3K3	1	1	2						MAP3K3	PE=1	SV=1
L0R8D2	Alternative protein RCOR1	RCOR1	1	2	1						RCOR1	PE=4	SV=1
P05109	Protein S100-A8	S100A8	1	3	0						S100A8	PE=1	SV=1
P35251,P35251-2	Replication factor C subunit 1	RFC1	3	1	0						RFC1	PE=1	SV=4
P35580-4	Isoform 4 of Myosin-10	MYH10	2	2	0						MYH10
P42677	40S ribosomal protein S27	RPS27	1	2	1						RPS27	PE=1	SV=3
P55268	Laminin subunit beta-2	LAMB2	1	3	0						LAMB2	PE=1	SV=2
Q13322,Q13322-2,Q13322-4	Growth factor receptor-bound protein 10	GRB10	0	1	3						GRB10	PE=1	SV=2
Q15717,Q15717-2	ELAV-like protein 1	ELAVL1	3	1	0						ELAVL1	PE=1	SV=2
Q549M8,Q5RLJ0,Q9Y224	RNA transcription, translation and transport factor protein	C14orf166	1	0	3						C14orf166	PE=2	SV=1
Q6ZVX7	F-box only protein 50	NCCRP1	4	0	0						NCCRP1	PE=1	SV=1
Q71RC2,Q71RC2-3,Q71RC2-4,Q71RC2-5	La-related protein 4	LARP4	0	3	1						LARP4	PE=1	SV=3
Q71U36,Q71U36-2	Tubulin alpha-1A chain	TUBA1A	2	1	1						TUBA1A	PE=1	SV=1
Q7Z3Z5,Q93074,Q93074-2,Q93074-3	Mediator of RNA polymerase II transcription subunit 12	MED12	3	1	0						MED12	PE=1	SV=1
Q86YZ3	Hornerin	HRNR	0	2	2						HRNR	PE=1	SV=2
Q8WVV4,Q8WVV4-1	Protein POF1B	POF1B	4	0	0						POF1B	PE=1	SV=3
Q96B18	Dapper homolog 3	DACT3	1	3	0						DACT3	PE=1	SV=2
Q96EE3,Q96EE3-1	Nucleoporin SEH1	SEH1L	1	3	0						SEH1L	PE=1	SV=3
Q96P16-3	Isoform 2 of Regulation of nuclear pre-mRNA domain-containing protein 1A	RPRD1A	2	2	0						RPRD1A
Q96RT1,Q96RT1-2,Q96RT1-3,Q96RT1-4,Q96RT1-5,Q96RT1-6,Q96RT1-7,Q96RT1-8,Q96RT1-9	Erbin	ERBIN	2	1	1						ERBIN	PE=1	SV=2
Q9P086,U4PP31	Mediator of RNA polymerase II transcription subunit 11	MED11	1	1	2						MED11	PE=1	SV=2
A0A024QZ60,B3KQ88,B3KTH5,B4DRX9,Q8WU58	Chromosome 17 open reading frame 63, isoform CRA_a	C17orf63	2	1	0						C17orf63	PE=4	SV=1
A0A024QZK8,P31942,P31942-2,P31942-3,Q53F48	Heterogeneous nuclear ribonucleoprotein H3 (2H9), isoform CRA_a	HNRPH3	1	1	1						HNRPH3	PE=4	SV=1
A0A024R125,P54619,P54619-3	5'-AMP-activated protein kinase subunit gamma-1	PRKAG1	2	1	0						PRKAG1	PE=3	SV=1
A0A024R1F9,Q9H1I8,Q9H1I8-3	Activating signal cointegrator 1 complex subunit 2, isoform CRA_c	ASCC2	2	0	1						ASCC2	PE=4	SV=1
A0A024R1K0,B1AKL4,Q9NRA8,Q9NRA8-3	Eukaryotic translation initiation factor 4E nuclear import factor 1, isoform CRA_a	EIF4ENIF1	0	2	1						EIF4ENIF1	PE=4	SV=1
A0A024R374,A0A7I2V440,A0A7I2V668,A0A7I2YQK9,A8K2H4,B3KUJ8,B4DL49,B4DMY4,E9PHZ5,P07858,Q6LAF9	Cathepsin B	CTSB	1	1	1						CTSB	PE=2	SV=1
A0A024R3U6,B3KPQ9,C9JR56,Q59FT3,Q9UPW6,Q9UPW6-2	DNA-binding protein SATB	SATB2	1	2	0						SATB2	PE=3	SV=1
A0A024R4E2,A0A087WX29,A0A0A0N0L3,B4DRW3,Q13148	TAR DNA-binding protein 43	TARDBP	2	0	1						TARDBP	PE=4	SV=1
A0A024R4Z1,A0A024R4Z4,A0A0A6YYC7,Q96JP5,Q96JP5-2	HCG2042749, isoform CRA_b	hCG_2042749	1	2	0						hCG_2042749	PE=4	SV=1
A0A024R5T1,A0A024R5Z0,B4DZH5,Q99081,Q99081-3	Transcription factor 12 (HTF4, helix-loop-helix transcription factors 4), isoform CRA_c	TCF12	2	0	1						TCF12	PE=4	SV=1
A0A024R693,P17931,Q59FR8,Q6FGL0,Q86TY5	Galectin	hCG_22119	3	0	0						hCG_22119	PE=2	SV=1
A0A024R778,C9JR52,P21246	Pleiotrophin (Heparin binding growth factor 8, neurite growth-promoting factor 1), isoform CRA_a	PTN	1	1	1						PTN	PE=3	SV=1
A0A024R7H8,O60885,O60885-2,O60885-3	Bromodomain containing 4, isoform CRA_b	BRD4	0	1	2						BRD4	PE=4	SV=1
A0A024R8K8,A0A2P0H7U5,B7ZLW2,J3QS41,P42694	Helicase with zinc finger, isoform CRA_a	HELZ	1	1	1						HELZ	PE=4	SV=1
A0A024R8Q0,A0A024R8V0,A0A0S2Z5A5,Q9UHD8,Q9UHD8-2,Q9UHD8-3,Q9UHD8-5,Q9UHD8-7	Septin 9, isoform CRA_b	2009-09-01	1	2	0						2009-09-01	PE=3	SV=1
A0A024R972,P11047	Laminin, gamma 1 (Formerly LAMB2), isoform CRA_a	LAMC1	2	1	0						LAMC1	PE=4	SV=1
A0A024RAS3,Q9H0S4,Q9H0S4-2	RNA helicase	hCG_27698	0	1	2						hCG_27698	PE=3	SV=1
A0A024RBL8,A0A024RBR2,B3KQC8,H0YIE9,O94952,O94952-1,Q4G104,Q8IUQ5	F-box protein 21, isoform CRA_c	FBXO21	0	2	1						FBXO21	PE=4	SV=1
A0A024RBS3,A0A024RBU9,C9J0Q5,C9JE98,Q9Y618,Q9Y618-4,Q9Y618-5	Nuclear receptor co-repressor 2, isoform CRA_c	NCOR2	0	1	2						NCOR2	PE=1	SV=1
A0A024RCF9,A8K5B0,Q9UH62	Armadillo repeat containing, X-linked 3, isoform CRA_a	ARMCX3	1	2	0						ARMCX3	PE=3	SV=1
A0A075B7B5,A0A1S5UZH8,B4DDU0,B7Z3G4,B7ZM87,O75044,Q5VZB5	SLIT-ROBO Rho GTPase-activating protein 2	SRGAP2	1	2	0						SRGAP2	PE=1	SV=1
A0A087WUI6,Q4G0R1,Q8WXW3	Progesterone-induced-blocking factor 1	PIBF1	0	0	3						PIBF1	PE=1	SV=1
A0A087WXC5,A0A7I2V2F6,A0A7I2V2I6,A0A7I2V2N6,A0A7I2V2W9,A0A7I2V2X3,A0A7I2V327,A0A7I2V3D4,A0A7I2V3H5,A0A7I2V419,A0A7I2V438,A0A7I2V458,A0A7I2V4N8,A0A7I2V594,A0A7I2V5B2,A0A7I2V5L0,A0A7I2V5U7,A0A7I2YQU0,A8K413,C9J6X0,E7ESZ7,H7C1Y7,H7C2X4,O95299,O95299-2,Q53SW4,Q59FM0,Q7Z518,Q8N1B9	NADH dehydrogenase [ubiquinone] 1 alpha subcomplex subunit 10, mitochondrial	NDUFA10	1	2	0						NDUFA10	PE=1	SV=2
A0A087WXU3,A0FGR8,A0FGR8-6	Extended synaptotagmin-2	ESYT2	2	0	1						ESYT2	PE=1	SV=1
A0A087WZ13,E9PAU2,Q8IY67-2	Ribonucleoprotein PTB-binding 1	RAVER1	2	0	1						RAVER1	PE=1	SV=1
A0A088AWN2,Q5JPH5,Q8TBZ3,Q8TBZ3-2,Q8TBZ3-5,Q8TBZ3-6,Q8TBZ3-7	WD repeat-containing protein 20	WDR20	1	2	0						WDR20	PE=1	SV=1
A0A0A0MRG9,A0A0C4ZLW1,A6H8X1,B3KVI2,B7ZLE9,B9EG74,Q66GT8,Q7Z3M0,Q96SN8,Q96SN8-2,Q96SN8-3,Q96SN8-4	CDK5 regulatory subunit-associated protein 2	CDK5RAP2	2	1	0						CDK5RAP2	PE=1	SV=1
A0A0B4J231,A0A5E4,A0A5H1ZRQ4,A0M8Q9,A2NUT2,B9A064,P0CG04,P0DOX8,P0DOY2,P0DOY3,Q567P1,Q5CZ94,Q6DHW4,Q6GMV7,Q6GMV8,Q6GMW3,Q6GMW4,Q6GMW6,Q6GMX3,Q6GMX4,Q6IN99,Q6IPQ0,Q6NS95,Q6P2J1,Q6P5S3,Q6PIK1,Q6PIQ7,Q6PJG0,Q6PJR7,Q7Z2U7,Q8N355,Q8N5F4,Q8NEJ1,Q8TCJ5,Q96E61,S6BGD6	Immunoglobulin lambda-like polypeptide 5	IGLL5	1	1	1						IGLL5	PE=1	SV=1
A0A0G2JLD8,A4D1U3,B7Z268,E7EUY5,Q04837,Q567R6	Single-stranded DNA-binding protein, mitochondrial (Fragment)	SSBP1	0	0	3						SSBP1	PE=1	SV=1
A0A0M4FEM1,B2RB32,B4DRW6,P11217,P11217-2	Alpha-1,4 glucan phosphorylase	PYGM	2	1	0						PYGM	PE=3	SV=1
A0A0S2Z3G9,F5GXS2,H7C144,O43707	Actinin alpha 4 isoform 1 (Fragment)	ACTN4	2	0	1						ACTN4	PE=2	SV=1
A0A0S2Z3H8,A0A0S2Z3S5,P63092,P63092-2,P63092-3,P63092-4,Q5FWY2,Q5JWF2,Q5JWF2-2	GNAS complex locus isoform 1 (Fragment)	GNAS	1	0	2						GNAS	PE=2	SV=1
A0A0S2Z4W4,A0A0S2Z4X1,P98175,P98175-2,P98175-3,P98175-4,P98175-5,Q7Z3D7	RNA binding motif protein 10 isoform 2 (Fragment)	RBM10	3	0	0						RBM10	PE=2	SV=1
A0A0S2Z5C7,A0A0S2Z5F0,I3L156,I3L419,Q9BSJ6,Q9BSJ6-2	Family with sequence similarity 64 member A isoform 2	FAM64A	1	1	1						FAM64A	PE=2	SV=1
A0A0S2Z5U3,A0A0S2Z6K1,A8K894,B7WPG3,C9IYN3,Q8WVV9,Q8WVV9-4,Q8WVV9-5,V9GYK2	Heterogeneous nuclear ribonucleoprotein L-like isoform 2 (Fragment)	HNRPLL	1	2	0						HNRPLL	PE=2	SV=1
A0A0U1RQI6,B4DM73,E3W994,E7ERI8,E7EW49,J3KR49,O75122,O75122-3,Q8NB74	CLIP-associating protein 2	CLASP2	1	2	0						CLASP2	PE=1	SV=1
A0A140VK66,Q8WVS4	Testicular secretory protein Li 66		1	0	2
A0A1C7CYX9,Q16555,Q16555-2,Q59GB4,Q8NAN9	Dihydropyrimidinase-related protein 2	DPYSL2	0	2	1						DPYSL2	PE=1	SV=1
A0A1S5UZ31,Q8TCM3,Q9H2D6,Q9H2D6-2,Q9H2D6-3,Q9H2D6-5,Q9H2D6-7	TRIO and F-actin-binding protein	TRIOBP	0	1	2						TRIOBP	PE=2	SV=1
A0A1U9X8X5,A0A1U9X8X6,A0A1U9X8X8,A0A1U9X8Y9,A0A1U9X8Z0,A0A1U9X901,A8K9C1,D2IYL2,G8JLG2,M1SWB8,Q0EFA5,Q15517,Q2L6G8	Corneodesmosin		3	0	0
A0A1W2PQU7	Glial fibrillary acidic protein (Fragment)	GFAP	0	1	2						GFAP	PE=1	SV=1
A0A2R8Y5P9,B3KY47,B4E244,Q6ZVL3,Q8TF72	Protein Shroom3	SHROOM3	1	1	1						SHROOM3	PE=1	SV=1
A0A2R8Y7B1,D6W5D1,Q3V6T2,Q3V6T2-2,Q3V6T2-3,Q3V6T2-4	Girdin	CCDC88A	1	1	1						CCDC88A	PE=1	SV=1
A0A384MDT2,P55795	Epididymis secretory sperm binding protein		1	1	1
A0A384NQ03,B4DRA0,G3XAC6,Q14498,Q14498-2,Q14498-3	Epididymis secretory sperm binding protein		0	1	2
A0A384NY94,Q5T5Y3,Q5T5Y3-3	Epididymis secretory sperm binding protein		2	1	0
A0A384P5S0,D6RER5,D6RGI3,Q9NVA2	Septin		0	1	2
A0A3B3IRR6,A0A3B3IT54,A0A3B3ITA3,Q9H7E9,Q9H7E9-2	UPF0488 protein C8orf33	C8orf33	1	1	1						C8orf33	PE=1	SV=1
A0A590UJ43,P48729,P48729-2,U3KPX3,V9HW00	Casein kinase I isoform alpha	CSNK1A1	2	1	0						CSNK1A1	PE=1	SV=1
A0A6Q8KRG2,Q08379	Golgin subfamily A member 2	GOLGA2	1	1	1						GOLGA2	PE=1	SV=1
A0A6Q8PFE1,A0A6Q8PFM5,A0A6Q8PG15,A0A6Q8PHC0,A0A6Q8PHJ9,A0A7I2PK44,O95831,O95831-3	Apoptosis-inducing factor 1, mitochondrial	AIFM1	0	2	1						AIFM1	PE=1	SV=1
A0A6Q8PG37,A0A6Q8PGH7,B4DM85,O00139,O00139-1,O00139-4,O00139-5	Kinesin-like protein	KIF2A	0	3	0						KIF2A	PE=1	SV=1
A0A7I2V2F1	Heterogeneous nuclear ribonucleoprotein A1 (Fragment)	HNRNPA1	1	1	1						HNRNPA1	PE=4	SV=1
A0A7I2V5T6,P04920,P04920-2,P04920-3,Q59GF1,Q8TAG3	Anion exchange protein 2	SLC4A2	0	1	2						SLC4A2	PE=4	SV=1
A0A7I2Y1C3,B2RU06,B2RU10,B4DGF1,B4DSI9,E7EUU4,E7EX73,E9PGM1,Q04637,Q04637-3,Q04637-4,Q04637-5,Q04637-6,Q04637-7,Q04637-8,Q04637-9,Q4LE58	Eukaryotic translation initiation factor 4 gamma 1	EIF4G1	2	1	0						EIF4G1	PE=4	SV=1
A0A7I2YQN9,Q13283,Q32P45,Q5U0Q1,Q6FI03	Ras GTPase-activating protein-binding protein 1	G3BP1	0	2	1						G3BP1	PE=4	SV=1
A3KC71,Q76M96,Q76M96-2	Nuclear envelope protein okuribin	okuribin	2	0	1						okuribin	PE=2	SV=1
A6NKD9	Coiled-coil domain-containing protein 85C	CCDC85C	1	1	1						CCDC85C	PE=1	SV=1
A6NN50,O75147,O75147-1,O75147-4	Obscurin-like protein 1	OBSL1	1	1	1						OBSL1	PE=1	SV=1
A8K088,A8K7F6,P60842	RNA helicase		1	1	1
A8K5H7,Q96I63,Q96TA2,Q96TA2-2,Q96TA2-3,Q9NQ51,Q9Y2Q2	cDNA FLJ77542, highly similar to Homo sapiens YME1-like 1 (S. cerevisiae) (YME1L1), transcript variant 3, mRNA		2	1	0
A8MWD9,F5H013,P62308,Q49AN9	Putative small nuclear ribonucleoprotein G-like protein 15	SNRPGP15	2	1	0						SNRPGP15	PE=5	SV=2
A8MYV2,B8ZZ10,D3DU41,Q1W6G4,Q9NQ29,Q9NQ29-2,Q9NQ29-3	LUC7-like (S. cerevisiae)	LUC7L	1	0	2						LUC7L	PE=1	SV=1
B0I1T6,M0R0P8,M0R300,Q13459,Q13459-2,Q4LE74	MYO9B variant protein		2	0	1
B2R5M9,Q02809,Q02809-2	Procollagen-lysine 5-dioxygenase		2	1	0
B2RE46,P04844,P04844-2	Dolichyl-diphosphooligosaccharide--protein glycosyltransferase subunit 2		0	3	0
B2RWP0,O60292	Signal-induced proliferation-associated 1 like 3	SIPA1L3	1	1	1						SIPA1L3	PE=2	SV=1
B3KN49,O94992	cDNA FLJ13562 fis, clone PLACE1008080, highly similar to Homo sapiens hexamethylene bis-acetamide inducible 1 (HEXIM1), mRNA		1	1	1
B3KNJ3,B3KSK3,O43293	cDNA FLJ14684 fis, clone NT2RP2004933, highly similar to Death-associated protein kinase 3		1	2	0
B3KQT2,B3KQT9,P30101,V9HVY3	Protein disulfide-isomerase		1	2	0
B3KRP4,P17036,Q6AWC6,Q86U76	cDNA FLJ34665 fis, clone LIVER2000626, highly similar to Zinc finger protein 38		0	1	2
B4DED3,B4DK65,B4DSV2,E7EW59,F5H433,H0YFS7,Q9Y467	cDNA FLJ59576, highly similar to Sal-like protein 2		1	1	1
B4DGB3,B4DS14,B5BU63,E7EVH7,F8W6L3,G3V2E7,G3V3H3,G3V5R9,G5E9S8,Q07866,Q07866-10,Q07866-2,Q07866-3,Q07866-4,Q07866-5,Q07866-6,Q07866-7,Q07866-8,Q07866-9,Q7RTP8,Q7RTQ0,Q7RTQ1,Q7RTQ2,Q7RTQ4,Q7RTQ7,Q7RTQ8,Q7RTQ9	Kinesin light chain		0	1	2
B4DI77,P48436,U5XJZ4	Transcription factor SOX-9		2	0	1
B4DIS3,Q9C005	Dpy-30-like protein, isoform CRA_b	LOC84661	2	1	0						LOC84661	PE=2	SV=1
B4DQC9,Q5TBP9,Q5TBQ0,Q9BX40,Q9BX40-3	cDNA FLJ52017, moderately similar to Protein FAM61B		1	2	0
B4DSF8,E9PLA9,Q14444,Q14444-2	cDNA FLJ57278		1	2	0
B4DTT8,Q96GA3	Protein LTV1 homolog		1	1	1
B4E106	Monocarboxylate transporter 1		0	0	3
B4E112,E9PP50,P23528,V9HWI5	Cofilin, non-muscle isoform		0	2	1
B4E1H9,P00558,P00558-2,V9HWF4	Phosphoglycerate kinase		0	0	3
B4E2V3,Q9UL54-2	cDNA FLJ56606, highly similar to Serine/threonine-protein kinase TAO2		0	3	0
B4E3V2,E3WH17,E7EMC7,E9PFW8,Q13501,Q13501-2	cDNA FLJ52854, highly similar to Sequestosome-1		2	0	1
C9JQX2,Q86VD9	GPI mannosyltransferase 4	PIGZ	1	1	1						PIGZ	PE=4	SV=1
C9K0J5,Q70E73	Ras association (RalGDS/AF-6) and pleckstrin homology domains 1, isoform CRA_b	RAPH1	1	1	1						RAPH1	PE=1	SV=1
D3DSU2,E5RGZ2,H0YKJ1,H0YLF2,Q6NT76,Q6NT76-2,Q6NT76-3,Q6NT76-4,Q6NT76-5	Homeobox containing 1, isoform CRA_c	HMBOX1	1	1	1						HMBOX1	PE=4	SV=1
D6RAX2,E7EPF8,E7ESU7,Q13363,Q13363-2,Q4KMQ8,X5D7T7,X5D8Y5	C-terminal-binding protein 1 (Fragment)	CTBP1	1	2	0						CTBP1	PE=1	SV=8
D6RGV5,D6RIE3,H0UI06,P14406,Q496I0	Cytochrome c oxidase subunit 7A2, mitochondrial (Fragment)	COX7A2	1	1	1						COX7A2	PE=1	SV=1
E5RGM3,E5RJR5,E7ERH2,F8W8N3,P63208,P63208-2	S-phase kinase-associated protein 1 (Fragment)	SKP1	1	1	1						SKP1	PE=1	SV=1
E7DVW5,Q01469	Fatty acid binding protein 5 (Psoriasis-associated)	FABP5	1	1	1						FABP5	PE=3	SV=1
E7EPN9,Q9Y520,Q9Y520-2,Q9Y520-3,Q9Y520-4,Q9Y520-5,Q9Y520-6,Q9Y520-7	Protein PRRC2C	PRRC2C	2	1	0						PRRC2C	PE=1	SV=1
E9PRG8,L0R588	Uncharacterized protein C11orf98	C11orf98	1	2	0						C11orf98	PE=4	SV=2
F2Z2W7,Q8IZ69,Q8IZ69-2	tRNA (uracil-5-)-methyltransferase homolog A	TRMT2A	1	1	1						TRMT2A	PE=1	SV=1
F5GWA4	BTB/POZ domain-containing adapter for CUL3-mediated RhoA degradation protein 3	KCTD10	2	1	0						KCTD10	PE=1	SV=1
F5GXW5,Q99622	Protein C10	C12orf57	2	1	0						C12orf57	PE=1	SV=1
F5GY08,Q6IRX3,Q9Y580	RNA-binding protein 7	RBM7	2	1	0						RBM7	PE=1	SV=1
H0YM23,O75179,O75179-2,O75179-6,O75179-7	Ankyrin repeat domain-containing protein 17 (Fragment)	ANKRD17	1	1	1						ANKRD17	PE=1	SV=1
J3KQN4,P83881,Q969Q0	60S ribosomal protein L36a	RPL36A	1	2	0						RPL36A	PE=1	SV=1
J3KQR7,Q9Y4F5,Q9Y4F5-2,Q9Y4F5-3	Centrosomal protein of 170 kDa protein B	CEP170B	1	1	1						CEP170B	PE=1	SV=1
L7RRS0,O00443	Phosphatidylinositol-4-phosphate 3-kinase	PIK3C2A	2	1	0						PIK3C2A	PE=3	SV=1
O00154-6	Isoform 6 of Cytosolic acyl coenzyme A thioester hydrolase	ACOT7	2	1	0						ACOT7
O15260,O15260-2,Q5T8U5,Q5T8U7	Surfeit locus protein 4	SURF4	0	1	2						SURF4	PE=1	SV=3
O43164,O43164-2,W0S1J7	E3 ubiquitin-protein ligase Praja-2	PJA2	1	1	1						PJA2	PE=1	SV=4
O60333-3	Isoform 3 of Kinesin-like protein KIF1B	KIF1B	1	1	1						KIF1B
O75339	Cartilage intermediate layer protein 1	CILP	0	2	1						CILP	PE=1	SV=4
P01040	Cystatin-A	CSTA	2	1	0						CSTA	PE=1	SV=1
P04899,P04899-4,Q93020	Guanine nucleotide-binding protein G(i) subunit alpha-2	GNAI2	2	1	0						GNAI2	PE=1	SV=3
P05198,Q53XC0	Eukaryotic translation initiation factor 2 subunit 1	EIF2S1	1	2	0						EIF2S1	PE=1	SV=3
P05412,Q6FHK0	Transcription factor AP-1	JUN	2	1	0						JUN	PE=1	SV=2
P06730,P06730-2	Eukaryotic translation initiation factor 4E	EIF4E	0	2	1						EIF4E	PE=1	SV=2
P40925-2	Isoform 2 of Malate dehydrogenase, cytoplasmic	MDH1	1	1	1						MDH1
P42166	Lamina-associated polypeptide 2, isoform alpha	TMPO	1	1	1						TMPO	PE=1	SV=2
P51116	Fragile X mental retardation syndrome-related protein 2	FXR2	2	0	1						FXR2	PE=1	SV=2
P52701,P52701-2,P52701-3	DNA mismatch repair protein Msh6	MSH6	2	1	0						MSH6	PE=1	SV=2
P63220,Q6FGH5,Q8WVC2	40S ribosomal protein S21	RPS21	0	3	0						RPS21	PE=1	SV=1
Q01804-3,Q01804-5	Isoform 3 of OTU domain-containing protein 4	OTUD4	1	1	1						OTUD4
Q08AD1,Q08AD1-2,Q08AD1-3	Calmodulin-regulated spectrin-associated protein 2	CAMSAP2	1	2	0						CAMSAP2	PE=1	SV=3
Q09028,Q09028-3	Histone-binding protein RBBP4	RBBP4	0	2	1						RBBP4	PE=1	SV=3
Q13151	Heterogeneous nuclear ribonucleoprotein A0	HNRNPA0	1	2	0						HNRNPA0	PE=1	SV=1
Q13509	Tubulin beta-3 chain	TUBB3	1	0	2						TUBB3	PE=1	SV=2
Q14571	Inositol 1,4,5-trisphosphate receptor type 2	ITPR2	1	2	0						ITPR2	PE=1	SV=2
Q15139,Q1KKQ2	Serine/threonine-protein kinase D1	PRKD1	1	1	1						PRKD1	PE=1	SV=2
Q3KP66,Q3KP66-3	Innate immunity activator protein	INAVA	1	1	1						INAVA	PE=1	SV=2
Q4ZG32,Q9HCM4,Q9HCM4-2,Q9HCM4-3,Q9HCM4-4	Band 4.1-like protein 5 (Fragment)	EPB41L5	0	2	1						EPB41L5	PE=4	SV=1
Q53EP0	Fibronectin type III domain-containing protein 3B	FNDC3B	1	2	0						FNDC3B	PE=1	SV=2
Q7L4I2,Q7L4I2-2	Arginine/serine-rich coiled-coil protein 2	RSRC2	3	0	0						RSRC2	PE=1	SV=1
Q7Z406	Myosin-14	MYH14	1	1	1						MYH14	PE=1	SV=2
Q8IXB1,Q8IXB1-2	DnaJ homolog subfamily C member 10	DNAJC10	2	1	0						DNAJC10	PE=1	SV=2
Q8N3C0	Activating signal cointegrator 1 complex subunit 3	ASCC3	0	3	0						ASCC3	PE=1	SV=3
Q8NAV1	Pre-mRNA-splicing factor 38A	PRPF38A	2	0	1						PRPF38A	PE=1	SV=1
Q8WU68,Q8WU68-3	Splicing factor U2AF 26 kDa subunit	U2AF1L4	1	0	2						U2AF1L4	PE=1	SV=2
Q96EK4	THAP domain-containing protein 11	THAP11	2	0	1						THAP11	PE=1	SV=2
Q96F86	Enhancer of mRNA-decapping protein 3	EDC3	0	2	1						EDC3	PE=1	SV=1
Q96FQ6	Protein S100-A16	S100A16	1	2	0						S100A16	PE=1	SV=1
Q96N86	cDNA FLJ31237 fis, clone KIDNE2004846, highly similar to 26S PROTEASOME REGULATORY SUBUNIT S3		1	1	1
Q96P70	Importin-9	IPO9	1	1	1						IPO9	PE=1	SV=3
Q99584	Protein S100-A13	S100A13	1	2	0						S100A13	PE=1	SV=1
Q9BQ70	Transcription factor 25	TCF25	0	2	1						TCF25	PE=1	SV=1
Q9BRX9	WD repeat domain-containing protein 83	WDR83	1	1	1						WDR83	PE=1	SV=1
Q9BUT9	MAPK regulated corepressor interacting protein 2	MCRIP2	2	0	1						MCRIP2	PE=1	SV=2
Q9H9B4	Sideroflexin-1	SFXN1	3	0	0						SFXN1	PE=1	SV=4
Q9UHB7	AF4/FMR2 family member 4	AFF4	1	1	1						AFF4	PE=1	SV=1
Q9Y2J4,Q9Y2J4-2,Q9Y2J4-3,Q9Y2J4-4	Angiomotin-like protein 2	AMOTL2	1	0	2						AMOTL2	PE=1	SV=3
sp|Q9C0C9|UBE2O_HUMAN	E2 ubiquitin-conjugating enzyme	UBE2O	2	1	0						UBE2O	PE=1	SV=3
A0A024QZA9,B4DGN9,H3BS02,H3BTL2,O14874,O14874-2,O14874-3	Protein-serine/threonine kinase	BCKDK	2	0	0						BCKDK	PE=3	SV=1
A0A024QZD5,A8KAQ5,M0QYR1,P08621,P08621-2,P08621-3	U1 small nuclear ribonucleoprotein 70 kDa	SNRP70	1	0	1						SNRP70	PE=4	SV=1
A0A024QZM0,A0A5F9ZH79,B3KU20,B7Z518,H0YCB3,Q8N9N2,Q8N9N2-2	Activating signal cointegrator 1 complex subunit 1, isoform CRA_a	ASCC1	1	1	0						ASCC1	PE=4	SV=1
A0A024R0A8,O43865	Adenosylhomocysteinase	AHCYL1	1	1	0						AHCYL1	PE=2	SV=1
A0A024R0S6,B3KUH4,B4DLA1,B4DU62,B7ZAY3,Q9NZN4,Q9NZN4-2	EH-domain containing 2, isoform CRA_a	EHD2	1	0	1						EHD2	PE=4	SV=1
A0A024R143,A0A024R165,Q14142,Q14142-3	Tripartite motif-containing 14, isoform CRA_c	TRIM14	0	1	1						TRIM14	PE=4	SV=1
A0A024R1C2,A8K4N2,B4E3G2,H0Y6W0,H7C4B0,O95985,O95985-2,O95985-3	DNA topoisomerase	TOP3B	1	1	0						TOP3B	PE=3	SV=1
A0A024R1Z4,H7BXP1,K7ERG2,Q9NYR9,Q9NYR9-2,Q9NYR9-3	NFKB inhibitor interacting Ras-like 2, isoform CRA_b	NKIRAS2	0	1	1						NKIRAS2	PE=3	SV=1
A0A024R274,K7EIU8,Q13485	Mothers against decapentaplegic homolog	SMAD4	0	1	1						SMAD4	PE=2	SV=1
A0A024R277,O15269	Serine palmitoyltransferase, long chain base subunit 1, isoform CRA_a	SPTLC1	2	0	0						SPTLC1	PE=4	SV=1
A0A024R2A8,Q96JG8,Q96JG8-2,Q96JG8-4	Melanoma antigen family D, 4, isoform CRA_d	MAGED4	1	1	0						MAGED4	PE=4	SV=1
A0A024R321,E7EN95,O75369,O75369-2,O75369-3,O75369-4,O75369-5,O75369-6,O75369-7,O75369-8,O75369-9,Q68CT4	Filamin B, beta (Actin binding protein 278), isoform CRA_a	FLNB	1	1	0						FLNB	PE=3	SV=1
A0A024R4K3,B3KTM1,G3XAL0,P40926,P40926-2,Q0QF37,Q6FHZ0,Q75MT9	Malate dehydrogenase	MDH2	2	0	0						MDH2	PE=2	SV=1
A0A024R4Z6,Q08945	FACT complex subunit SSRP1	SSRP1	1	1	0						SSRP1	PE=3	SV=1
A0A024R525,B3KXC3,G3V192,G3V1D1,P02794,Q6NS36,Q6NZ44	Ferritin	FTH1	2	0	0						FTH1	PE=3	SV=1
A0A024R582,E9PN04,J3KMZ8,Q92785,Q92785-2	D4, zinc and double PHD fingers family 2, isoform CRA_a	DPF2	1	1	0						DPF2	PE=3	SV=1
A0A024R663,Q86UP2,Q86UP2-2,Q86UP2-3,Q86UP2-4	Kinectin 1 (Kinesin receptor), isoform CRA_a	KTN1	0	0	2						KTN1	PE=4	SV=1
A0A024R6F2,G3V256,G3V5I6,H0YJA2,Q6PJT7,Q6PJT7-10,Q6PJT7-11,Q6PJT7-2,Q6PJT7-3,Q6PJT7-4,Q6PJT7-5,Q6PJT7-9	Zinc finger CCCH domain-containing protein 14	FLJ11806	1	1	0						FLJ11806	PE=3	SV=1
A0A024R6K1,G3V2Q3,G3V5E1,O75909,O75909-1,O75909-2,O75909-4	Cyclin K, isoform CRA_c	CCNK	0	2	0						CCNK	PE=3	SV=1
A0A024R6N2,Q9Y5S2	Non-specific serine/threonine protein kinase	CDC42BPB	1	1	0						CDC42BPB	PE=3	SV=1
A0A024R7C5,K7EKI4,K7ELF1,K7ELQ0,K7ES61,Q9BYD3,Q9BYD3-2,X6RAY8	Mitochondrial ribosomal protein L4, isoform CRA_a	MRPL4	1	1	0						MRPL4	PE=3	SV=1
A0A024R7T3,B4DKS8,P52597	Heterogeneous nuclear ribonucleoprotein F, isoform CRA_a	HNRPF	1	1	0						HNRPF	PE=4	SV=1
A0A024R7X7,A8K276,B7Z1P6,E5RJN7,E7EPX0,E7EVI1,E7EVJ4,Q2TBD5,Q4LE57,Q9NUL3,Q9NUL3-2,Q9NUL3-3,Q9NUL3-4,Q9NUL3-6,Q9NUL3-7,Q9NUL3-8	Double-stranded RNA-binding protein Staufen homolog 2	STAU2	1	1	0						STAU2	PE=4	SV=1
A0A024R825,B4DUJ3,B4DUJ8,P07451,V9HWA3	Carbonic anhydrase	CA3	1	1	0						CA3	PE=3	SV=1
A0A024R897,B3KPC7,Q9BPX5	Actin-related protein 2/3 complex subunit 5	ARPC5L	1	0	1						ARPC5L	PE=2	SV=1
A0A024R8R5,C9JLW8,I3L2L5,I3L317,I3L3A7,I3L4Q0	HCG1818442, isoform CRA_c	hCG_1818442	1	1	0						hCG_1818442	PE=3	SV=1
A0A024RAC5,A5PLK7,Q9P258	Epididymis secretory sperm binding protein	RCC2	1	1	0						RCC2	PE=2	SV=1
A0A024RAW0,F5H872,Q13503	Mediator of RNA polymerase II transcription subunit 21	SURB7	1	1	0						SURB7	PE=2	SV=1
A0A024RB41,A0A7I2V2K5,A0A7I2V473,E9PAV3,E9PAV3-2,F8VNW4,F8W0W4,H0YHX9,Q13765	HCG2016482, isoform CRA_b	hCG_2016482	0	1	1						hCG_2016482	PE=4	SV=1
A0A024RC29,A8K6T3,Q14574,Q14574-2	Desmocollin 3, isoform CRA_b	DSC3	2	0	0						DSC3	PE=4	SV=1
A0A024RC47,P17028	Zinc finger protein 24 (KOX 17), isoform CRA_b	ZNF24	2	0	0						ZNF24	PE=1	SV=1
A0A024RCE9,A0A140VJF6,B4DLY3,B4DM60,Q8IWQ3,Q8IWQ3-2,Q8IWQ3-3,Q8IWQ3-4,Q8IWQ3-5,Q8IWQ3-6	BR serine/threonine kinase 2, isoform CRA_c	BRSK2	1	1	0						BRSK2	PE=4	SV=1
A0A024RCJ2,P06899,P23527,P33778,Q16778	Histone H2B	HIST1H2BJ	2	0	0						HIST1H2BJ	PE=3	SV=1
A0A024RCS3,A0A1U9X7L0,A8K822,B2R7M0,B4E1C1,Q53F85,Q9UER7,Q9UER7-2,Q9UER7-3,Q9UER7-4	Daxx	DAXX	0	2	0						DAXX	PE=3	SV=1
A0A024RDM6,A0A0A0MRY4,Q96N96,Q96N96-2,Q96N96-3,Q96N96-4,Q96N96-6	SPATA13	SPATA13	1	1	0						SPATA13	PE=4	SV=1
A0A024RDY7,A0A087X0U0,Q5T911,Q9NPJ6,Q9NPJ6-2,U4PSC4	Mediator of RNA polymerase II transcription subunit 4	MED4	0	1	1						MED4	PE=3	SV=1
A0A087WU53,B4DH58,Q96SP2,Q9H0U3	Dolichyl-diphosphooligosaccharide--protein glycosyltransferase subunit MAGT1	MAGT1	2	0	0						MAGT1	PE=1	SV=1
A0A087WUH1,A0A0A0MS35,B7Z3S2,B7Z975,Q5VT61,Q7Z4K8,Q7Z4K8-2,Q7Z4K8-3,Q7Z4K8-4,Q7Z4K8-5	Tripartite motif-containing protein 46	TRIM46	1	1	0						TRIM46	PE=1	SV=1
A0A087WV05,Q99417	Uncharacterized protein		1	0	1
A0A087WXQ8,A0A087WY10,A0A384NL22,P49720	Proteasome chain 13	PSMB3	2	0	0						PSMB3	PE=1	SV=1
A0A087WYL7,A8K3N2,G3V4A5,O75586,O75586-2	Mediator of RNA polymerase II transcription subunit 6	MED6	1	1	0						MED6	PE=1	SV=1
A0A090N7Y0,C9J975,E7ESL9,H7C4F1,Q86ST5,Q96P47,Q96P47-2,Q96P47-3,Q96P47-4,Q96P47-6	Centaurin, gamma 3	CENTG3	1	1	0						CENTG3	PE=3	SV=1
A0A090N8Z9,Q6STE5-2	SWI/SNF related, matrix associated, actin dependent regulator of chromatin, subfamily d, member 3	SMARCD3	1	1	0						SMARCD3	PE=3	SV=1
A0A0A0MRX8,A0A1B0GU97,A0A1B0GW37,A0A1B0GWI9,A0A1B0GWJ4,A0A2R8Y7V8,O00712,O00712-4,O00712-5,Q5VW26,Q5VW27,Q5VW28,Q5VW30,U3KQE8	Nuclear factor 1	NFIB	0	0	2						NFIB	PE=1	SV=1
A0A0A0MSS3,A0A0C4DFN6,C9JD09,C9JP03,C9JUW9,Q5T6P1,Q5T6P2,Q7L0J2,Q8ND83,Q8ND83-2,Q8ND83-4,X6RDJ2,X6RGK9	SLAIN motif-containing protein 1	SLAIN1	1	1	0						SLAIN1	PE=1	SV=1
A0A0A0MT08,B4DXB3,B4DZ16,B7Z7S6,B7ZBM2,B7ZLM0,F8W8P2,Q68CQ1,Q68CQ1-1,Q68CQ1-2,Q68CQ1-9,Q69YY0	MROH7-TTC4 readthrough (NMD candidate)	MROH7-TTC4	2	0	0						MROH7-TTC4	PE=4	SV=1
A0A0C4DGA6,A8K5B6,H7C5K0,Q14527,Q14527-2,Q59GQ7	Helicase-like transcription factor	HLTF	2	0	0						HLTF	PE=1	SV=1
A0A0C4DGV8,A0A1S5UZH6,B4DEK9,Q13214,Q13214-2,Q59FY7,Q6PI51	Semaphorin-3B	SEMA3B	2	0	0						SEMA3B	PE=1	SV=1
A0A0G2JIW1,A0A1U9X7W4,A8K5I0,B4DFN9,P0DMV8,P0DMV8-2,P0DMV9,Q59EJ3	Heat shock 70 kDa protein 1B	HSPA1B	2	0	0						HSPA1B	PE=1	SV=1
A0A0G2JJL7,F6QYI9	RNA helicase (Fragment)	DDX39B	1	0	1						DDX39B	PE=1	SV=1
A0A0J9YY14,A0A6Q8PEY3,A0A6Q8PGV6,I3L2R9,I3L3G9,I3L522,Q9NXR1,Q9NXR1-1,X5DP35,X5DR54	Nuclear distribution protein nudE homolog 1 (Fragment)	NDE1	0	1	1						NDE1	PE=1	SV=1
A0A0U1RRK1,A0A286YF11,F6XEV2,Q9BPX6,Q9BPX6-3	Calcium uptake protein 1, mitochondrial	MICU1	2	0	0						MICU1	PE=1	SV=1
A0A140T9R1,A2VCL5,O75955,O75955-2,Q5ST80,Q6IB58	Flotillin (Fragment)	FLOT1	1	1	0						FLOT1	PE=1	SV=1
A0A140VJF3,J3QT28,O43684,O43684-2	Testicular tissue protein Li 27		1	1	0
A0A140VJS3,P62195	Testicular tissue protein Li 149		0	1	1
A0A1L1UHR1,P21796	Voltage-dependent anion-selective channel protein 1		1	0	1
A0A1U9X8F1,A0A1U9X8F2,B4DVB5,Q06587	E3 ubiquitin-protein ligase RING1		1	0	1
A0A223PQH6,A6NEM2,P51610,P51610-2,P51610-4	HCFC1		1	1	0
A0A2R8Y7I0	Chromodomain-helicase-DNA-binding protein 4 (Fragment)	CHD4	1	1	0						CHD4	PE=1	SV=1
A0A2R8YGD3	Cyclic nucleotide ras GEF	RAPGEF2	0	1	1						RAPGEF2	PE=1	SV=1
A0A2U3TZL8,A0A7I2V5Y5,H7BYN4,Q02241,Q02241-2,Q02241-3	Kinesin-like protein	KIF23	1	1	0						KIF23	PE=1	SV=1
A0A2X0SFG4,D3DS14,Q8TER5,Q8TER5-4	ARHGEF40 (Fragment)	ARHGEF40	1	1	0						ARHGEF40	PE=4	SV=1
A0A2X0SSH0,B7Z3C7,Q15052,Q15052-2,Q8N4Q3	ARHGEF6 (Fragment)	ARHGEF6	1	0	1						ARHGEF6	PE=4	SV=1
A0A384MDR3,B1Q3B3,B1Q3B4,P02792,Q6S4P3	Ferritin	FTL	1	1	0						FTL	PE=2	SV=1
A0A384MR27,P09382	Galectin		0	0	2
A0A384MTW7,C9K028,E5RHP0,E7ERL0,F6XY72,J3KPD9,P15531,P15531-2,P22392,P22392-2,Q32Q12,Q6FHN3	Nucleoside diphosphate kinase		1	1	0
A0A384NL45,B3KM97,M0R3C3,Q9NZ01	Very-long-chain enoyl-CoA reductase		0	1	1
A0A3B3IRU6,A0A3B3ISL2,B9EG68,Q96Q96,Q9GZU2,Q9GZU2-2,Q9GZU2-4	Paternally-expressed gene 3 protein	PEG3	1	1	0						PEG3	PE=1	SV=1
A0A3B3ITJ4	Heterogeneous nuclear ribonucleoprotein L (Fragment)	HNRNPL	1	0	1						HNRNPL	PE=1	SV=1
A0A3B3IUA2,B1AHD1,P55769,Q6FHM6	Ribonucloprotein	SNU13	1	1	0						SNU13	PE=1	SV=1
A0A494C036,A0A494C055,A0A494C087,A0A494C0U4,A0A494C1B4,A0A494C1F0,A0A494C1H9,A0A494C1J5,A0A494C1R4,B4DFE7,P23471,P23471-2,P23471-3	Protein-tyrosine-phosphatase	PTPRZ1	1	0	1						PTPRZ1	PE=1	SV=1
A0A494C050,Q8N5F7	NF-kappa-B-activating protein (Fragment)	NKAP	1	1	0						NKAP	PE=1	SV=1
A0A494C151	Ankyrin repeat domain-containing protein 20A1 (Fragment)	ANKRD20A1	0	2	0						ANKRD20A1	PE=4	SV=1
A0A494C1S7,Q9Y5Q9,Q9Y5Q9-2	General transcription factor 3C polypeptide 3	GTF3C3	1	1	0						GTF3C3	PE=1	SV=1
A0A5C2FXW5,A0A5C2FY02,A0A5C2G6D6,A0A5C2G887,A0A5C2GJW2,A0A5C2GK40,A0A5C2GVM6,A0A5C2H1S8	IGL c465_light_IGLV3-25_IGLJ1 (Fragment)		0	2	0
A0A5C2GPZ9	IG c1475_heavy_IGHV3-53_IGHD5-12_IGHJ3 (Fragment)		1	1	0
A0A6Q8PFQ0,A0A6Q8PH54,Q9P2F8	Signal-induced proliferation-associated 1-like protein 2	SIPA1L2	1	1	0						SIPA1L2	PE=1	SV=1
A0A7G6J4N4,Q14694,Q14694-2,Q14694-3,Q6P2I0	Ubiquitin carboxyl-terminal hydrolase		1	1	0
A0A7I2V389,A0A7I2V3W8,A0A7I2V604,A6NEC2,B3KTP2,B3KU93,B7Z4B2,B7Z6T6,B7Z899,E9PLK3,E9PP11,E9PPZ2,P55786	Puromycin-sensitive aminopeptidase	NPEPPS	2	0	0						NPEPPS	PE=4	SV=1
A0A7I2V6D6,A0A7I2YQ93,B4DN26,B4DNJ1,B4DRD3,B4DV92,B8ZX62,E7ESF4,P00750,P00750-2,P00750-3,P00750-4,Q8NG20	Tissue-type plasminogen activator	PLAT	1	1	0						PLAT	PE=4	SV=1
A2RUM7,P46777,Q59GX9	Ribosomal protein L5	RPL5	0	2	0						RPL5	PE=2	SV=1
A3F768,A3F769,O15226,O15226-2,Q6NUN2	NF-kappaB repressing factor	NRF	1	1	0						NRF	PE=2	SV=1
A4D0W6	Similar to ribosomal protein L18; 60S ribosomal protein L18	LOC136143	1	1	0						LOC136143	PE=3	SV=1
A4D1M3,B7Z577,B7Z5J4,Q9UI42,Q9UI42-2	Carboxypeptidase A4	CPA4	1	1	0						CPA4	PE=2	SV=1
A6NHK2,P62304	Small nuclear ribonucleoprotein E	SNRPE	1	1	0						SNRPE	PE=1	SV=1
A7E2D7,Q96L91,Q96L91-2,Q96L91-3,Q96L91-4,Q96L91-5	EP400 protein (Fragment)	EP400	2	0	0						EP400	PE=2	SV=1
A8K1F4,Q15773,Q5U0N1	cDNA FLJ78094, highly similar to Homo sapiens myeloid leukemia factor 2, mRNA		1	0	1
A8K3S0,P40937,Q6LES9	cDNA FLJ76127, highly similar to Homo sapiens replication factor C (activator 1) 5, 36.5kDa (RFC5), transcript variant 1, mRNA		1	1	0
A8K4P6,B4DET6,E9PR71,Q53H09,Q6P1X0,Q9P2Y5	cDNA FLJ77656, highly similar to Homo sapiens UV radiation resistance associated gene (UVRAG), mRNA		1	1	0
A8K513,Q8WVK2	U4/U6.U5 small nuclear ribonucleoprotein 27 kDa protein	hCG_1994066	0	1	1						hCG_1994066	PE=2	SV=1
A8K7A2,Q53HL2	cDNA FLJ78084, highly similar to Homo sapiens cell division cycle associated 8, mRNA		0	0	2
A8K7S0,B4DGJ0,B4DVK3,Q0VDC7,Q8IWZ8,Q8IWZ8-2,V9GZ08	cDNA FLJ75478, highly similar to Homo sapiens splicing factor 4 (SF4), transcript variant a, mRNA		1	1	0
B2R4R9,P62857	40S ribosomal protein S28	RPS28	1	1	0						RPS28	PE=2	SV=1
B2R7V4,O43172,O43172-2,Q59EL4,Q5T1M7,Q6IAP9	cDNA, FLJ93619, highly similar to Homo sapiens PRP4 pre-mRNA processing factor 4 homolog (yeast) (PRPF4), mRNA		2	0	0
B2RDK6,O75477	cDNA, FLJ96656, highly similar to Homo sapiens SPFH domain family, member 1 (SPFH1), mRNA		2	0	0
B3KN15,Q7LGA3,Q7LGA3-2,Q7LGA3-3	cDNA FLJ13198 fis, clone NT2RP3004454, highly similar to Heparan sulfate 2-O-sulfotransferase 1		1	1	0
B3KNG9,B3KQG6,O95373	cDNA FLJ14581 fis, clone NT2RM4001382, highly similar to Importin-7		1	0	1
B3KPD3,Q9NQS7,Q9NQS7-2	cDNA FLJ31633 fis, clone NT2RI2003407, highly similar to Inner centromere protein (Fragment)		0	0	2
B3KRK4	cDNA FLJ34459 fis, clone HLUNG2002916, highly similar to SRC SUBSTRATE CORTACTIN		2	0	0
B3KST9,F8W8D3,Q14493,Q53XR2	cDNA FLJ36938 fis, clone BRACE2005434, highly similar to Histone RNA hairpin-binding protein		0	2	0
B3KVL5,Q8TBK6,Q8TBK6-2	Zinc finger CCHC domain-containing protein 10	ZCCHC10	1	1	0						ZCCHC10	PE=1	SV=1
B3KXP1	cDNA FLJ45802 fis, clone NT2RI3001967, highly similar to Ankyrin repeat and SAM domain-containing protein 6		1	1	0
B3KY60,B4DSH1,Q99459	cDNA FLJ16777 fis, clone BRHIP2029567, highly similar to Cell division cycle 5-like protein		1	1	0
B4DE59	Junction plakoglobin		1	1	0
B4DEV8,B4E0X6,P25786,P25786-2	Proteasome subunit alpha type		2	0	0
B4DFE6,B4DL14,P36542,P36542-2,Q8TAS0	cDNA FLJ59861, highly similar to ATP synthase gamma chain, mitochondrial		0	0	2
B4DGM4,B4DN56,B4DUA7,B7Z9P5,M0R3F3,Q9NX70,Q9NX70-2	Intersex-like protein		1	1	0
B4DQ24	cDNA FLJ54420, highly similar to Homo sapiens spectrin domain with coiled-coils 1 (SPECC1), transcript variant, mRNA		0	0	2
B4DRS4,O43719,Q5H918,Q5H919	cDNA FLJ60139, highly similar to Homo sapiens HIV TAT specific factor 1 (HTATSF1), mRNA		1	1	0
B4DRY7,Q53T99,Q9GZL7	cDNA FLJ51286, highly similar to WD repeat protein 12		1	1	0
B4DTL6,O15294	cDNA FLJ61388, highly similar to UDP-N-acetylglucosamine--peptideN-acetylglucosaminyltransferase 110 kDa subunit		1	1	0
B5BTZ8,P08579,Q86YK2	Small nuclear ribonucleoprotein polypeptide B''	SNRPB2	1	1	0						SNRPB2	PE=2	SV=1
B7Z321,Q6NX51,Q96A65	Exocyst complex component Sec8		1	1	0
B7Z504,D6RA57,H0Y9X1,Q96EY4	Translation machinery-associated protein 16		1	1	0
C9J1V9,D6RBD7,O43324,O43324-2	EEF1E1-BLOC1S5 readthrough (NMD candidate)	EEF1E1-BLOC1S5	1	1	0						EEF1E1-BLOC1S5	PE=4	SV=2
C9J8T0,P57772	Selenocysteine-specific elongation factor	EEFSEC	0	0	2						EEFSEC	PE=1	SV=1
C9JW52	Insulin-like growth factor-binding protein 2 (Fragment)	IGFBP2	1	1	0						IGFBP2	PE=1	SV=1
D6R9A6,P26583,Q5U071	High mobility group protein B2 (Fragment)	HMGB2	0	1	1						HMGB2	PE=1	SV=1
E9PP73,P53618	Coatomer subunit beta (Fragment)	COPB1	2	0	0						COPB1	PE=1	SV=8
F8VNQ3,G3V106,Q9NT68,Q9NT68-2	Teneurin-2	TENM2	1	1	0						TENM2	PE=1	SV=1
F8VXK4,F8W1I9,Q6JQN1,Q6JQN1-2,Q6JQN1-3,Q6JQN1-5	Acyl-CoA dehydrogenase family member 10 (Fragment)	ACAD10	1	1	0						ACAD10	PE=1	SV=1
F8WBL2,Q13895	Bystin	BYSL	1	1	0						BYSL	PE=1	SV=1
G1UI16,Q29RF7	SCC-112 protein, isoform CRA_b	PDS5A	1	1	0						PDS5A	PE=2	SV=1
G5E9W7,P82650,Q8NBL6	28S ribosomal protein S22, mitochondrial	MRPS22	1	1	0						MRPS22	PE=1	SV=1
H0YHL7	Coronin-1C (Fragment)	CORO1C	1	1	0						CORO1C	PE=1	SV=1
H0YN99,Q9H792	Inactive tyrosine-protein kinase PEAK1	PEAK1	1	1	0						PEAK1	PE=1	SV=1
H3BNI9,H3BSA1,P19784	Casein kinase II subunit alpha'	CSNK2A2	1	1	0						CSNK2A2	PE=1	SV=2
H3BNV7,Q9Y3D0	Cytosolic iron-sulfur assembly component 2B (Fragment)	CIAO2B	0	1	1						CIAO2B	PE=1	SV=1
H3BS72,Q9P035,Q9P035-2	Very-long-chain (3R)-3-hydroxyacyl-CoA dehydratase	HACD3	1	0	1						HACD3	PE=1	SV=1
H3BUF6	Ataxin-2-like protein	ATXN2L	1	1	0						ATXN2L	PE=1	SV=1
H7C0N4,L0R8E5	Splicing factor 1 (Fragment)	SF1	1	1	0						SF1	PE=1	SV=1
H7C3A1,Q9BXP5,Q9BXP5-2,Q9BXP5-3,Q9BXP5-4,Q9BXP5-5	Arsenite-resistance protein 2 (Fragment)	SRRT	0	2	0						SRRT	PE=1	SV=1
I3L1P8,Q02978,Q02978-2,Q6IBH0	Mitochondrial 2-oxoglutarate/malate carrier protein (Fragment)	SLC25A11	2	0	0						SLC25A11	PE=1	SV=1
J3KND3,P60660	Myosin light polypeptide 6	MYL6	1	0	1						MYL6	PE=1	SV=1
K7ELE3	TLE family member 5 (Fragment)	TLE5	2	0	0						TLE5	PE=1	SV=1
K7EM38	Actin, cytoplasmic 2 (Fragment)	ACTG1	1	1	0						ACTG1	PE=1	SV=1
M0QXZ8	Rho GTPase-activating protein SYDE1	SYDE1	1	1	0						SYDE1	PE=1	SV=1
M0QYH4	Synaptotagmin-3 (Fragment)	SYT3	0	0	2						SYT3	PE=1	SV=1
O15379,O15379-2	Histone deacetylase 3	HDAC3	0	1	1						HDAC3	PE=1	SV=2
O43318,O43318-2,Q5U0C9,Q5U0D0,Q9UG54	Mitogen-activated protein kinase kinase kinase 7	MAP3K7	2	0	0						MAP3K7	PE=1	SV=1
O43896	Kinesin-like protein KIF1C	KIF1C	0	2	0						KIF1C	PE=1	SV=3
O60346	PH domain leucine-rich repeat-containing protein phosphatase 1	PHLPP1	0	1	1						PHLPP1	PE=1	SV=3
O94875-10	Isoform 10 of Sorbin and SH3 domain-containing protein 2	SORBS2	1	0	1						SORBS2
O95104,O95104-2,O95104-3,Q0P607	SR-related and CTD-associated factor 4	SCAF4	0	0	2						SCAF4	PE=1	SV=3
O95864,O95864-3	Acyl-CoA 6-desaturase	FADS2	1	0	1						FADS2	PE=1	SV=1
O96019,O96019-2,Q53FS0,Q6FI97	Actin-like protein 6A	ACTL6A	1	1	0						ACTL6A	PE=1	SV=1
P02511,V9HW27	Alpha-crystallin B chain	CRYAB	2	0	0						CRYAB	PE=1	SV=2
P04350	Tubulin beta-4A chain	TUBB4A	1	1	0						TUBB4A	PE=1	SV=2
P16402	Histone H1.3	H1-3	1	1	0						H1-3	PE=1	SV=2
P19474	E3 ubiquitin-protein ligase TRIM21	TRIM21	1	1	0						TRIM21	PE=1	SV=1
P40222	Alpha-taxilin	TXLNA	0	0	2						TXLNA	PE=1	SV=3
P42357,P42357-2	Histidine ammonia-lyase	HAL	2	0	0						HAL	PE=1	SV=1
P46939,P46939-2	Utrophin	UTRN	1	1	0						UTRN	PE=1	SV=2
P51571	Translocon-associated protein subunit delta	SSR4	2	0	0						SSR4	PE=1	SV=1
P52655	Transcription initiation factor IIA subunit 1	GTF2A1	2	0	0						GTF2A1	PE=1	SV=1
P61244-2,Q8TAX8	Isoform 2 of Protein max	MAX	1	1	0						MAX
P82921	28S ribosomal protein S21, mitochondrial	MRPS21	0	1	1						MRPS21	PE=1	SV=3
Q01167,Q01167-2	Forkhead box protein K2	FOXK2	1	1	0						FOXK2	PE=1	SV=3
Q01196,Q01196-10,Q01196-11,Q01196-2,Q01196-4,Q01196-8,Q01196-9,Q2TAM6	Runt-related transcription factor 1	RUNX1	1	1	0						RUNX1	PE=1	SV=3
Q08J23,Q08J23-2	RNA cytosine C(5)-methyltransferase NSUN2	NSUN2	0	2	0						NSUN2	PE=1	SV=2
Q12797,Q12797-10	Aspartyl/asparaginyl beta-hydroxylase	ASPH	2	0	0						ASPH	PE=1	SV=3
Q12962	Transcription initiation factor TFIID subunit 10	TAF10	1	1	0						TAF10	PE=1	SV=1
Q13123,Q95HA6,Q9UK43	Protein Red	IK	2	0	0						IK	PE=1	SV=3
Q14008,Q14008-2,Q14008-3	Cytoskeleton-associated protein 5	CKAP5	2	0	0						CKAP5	PE=1	SV=3
Q14CN4,Q14CN4-2,Q14CN4-3	Keratin, type II cytoskeletal 72	KRT72	0	2	0						KRT72	PE=1	SV=2
Q15056,Q15056-2	Eukaryotic translation initiation factor 4H	EIF4H	0	2	0						EIF4H	PE=1	SV=5
Q15554,Q15554-4	Telomeric repeat-binding factor 2	TERF2	1	1	0						TERF2	PE=1	SV=3
Q562V5	Actin-like protein (Fragment)	ACT	1	1	0						ACT	PE=4	SV=1
Q5QPA5,Q9NVS2,Q9NVS2-2,Q9NVS2-3	39S ribosomal protein S18a, mitochondrial (Fragment)	MRPS18A	1	1	0						MRPS18A	PE=1	SV=9
Q5UW39,Q9Y2K1,Q9Y2K1-2	L2		0	1	1
Q63ZY3,Q63ZY3-2,Q63ZY3-3	KN motif and ankyrin repeat domain-containing protein 2	KANK2	0	2	0						KANK2	PE=1	SV=1
Q6MZQ6,Q6N094,Q6N097,Q7Z351	Uncharacterized protein DKFZp686G11190	DKFZp686G11190	0	0	2						DKFZp686G11190	PE=2	SV=1
Q7Z460-4	Isoform 4 of CLIP-associating protein 1	CLASP1	2	0	0						CLASP1
Q8IVM0,Q8IVM0-2	Coiled-coil domain-containing protein 50	CCDC50	1	1	0						CCDC50	PE=1	SV=1
Q8IWP6	Tubulin beta chain		1	1	0
Q8IZH2,Q8IZH2-2	5'-3' exoribonuclease 1	XRN1	2	0	0						XRN1	PE=1	SV=1
Q8N2H2,Q9BZL6,Q9BZL6-2,Q9BZL6-3	Protein kinase C		1	1	0
Q8N3E9	1-phosphatidylinositol 4,5-bisphosphate phosphodiesterase delta-3	PLCD3	0	0	2						PLCD3	PE=1	SV=3
Q8NEJ9,Q8NEJ9-2	Neuroguidin	NGDN	1	1	0						NGDN	PE=1	SV=1
Q8NI27	THO complex subunit 2	THOC2	1	1	0						THOC2	PE=1	SV=2
Q8WXE0,Q8WXE0-2	Caskin-2	CASKIN2	1	1	0						CASKIN2	PE=1	SV=2
Q8WYQ5,Q8WYQ5-2,Q8WYQ5-3	Microprocessor complex subunit DGCR8	DGCR8	1	0	1						DGCR8	PE=1	SV=1
Q92567,Q92567-2,Q92567-3	Protein FAM168A	FAM168A	1	1	0						FAM168A	PE=1	SV=2
Q92747,V9HVZ6	Actin-related protein 2/3 complex subunit 1A	ARPC1A	0	1	1						ARPC1A	PE=1	SV=2
Q96HN2,Q96HN2-2	Adenosylhomocysteinase 3	AHCYL2	1	1	0						AHCYL2	PE=1	SV=1
Q96HR3,Q96HR3-2	Mediator of RNA polymerase II transcription subunit 30	MED30	1	1	0						MED30	PE=1	SV=1
Q96IU2	Zinc finger BED domain-containing protein 3	ZBED3	1	1	0						ZBED3	PE=1	SV=1
Q96IZ7,Q96IZ7-2	Serine/Arginine-related protein 53	RSRC1	0	1	1						RSRC1	PE=1	SV=1
Q96MH2	Protein HEXIM2	HEXIM2	0	1	1						HEXIM2	PE=1	SV=1
Q96P63,Q96P63-2	Serpin B12	SERPINB12	2	0	0						SERPINB12	PE=1	SV=1
Q96PK6-5	Isoform 5 of RNA-binding protein 14	RBM14	1	1	0						RBM14
Q96SB3	Neurabin-2	PPP1R9B	0	1	1						PPP1R9B	PE=1	SV=3
Q9BTA9,Q9BTA9-2	WW domain-containing adapter protein with coiled-coil	WAC	0	1	1						WAC	PE=1	SV=3
Q9BXS6,Q9BXS6-2,Q9BXS6-3,Q9BXS6-5,Q9BXS6-7	Nucleolar and spindle-associated protein 1	NUSAP1	0	1	1						NUSAP1	PE=1	SV=1
Q9BYG4,Q9NS63	Partitioning defective 6 homolog gamma	PARD6G	1	1	0						PARD6G	PE=1	SV=1
Q9BYW2	Histone-lysine N-methyltransferase SETD2	SETD2	1	1	0						SETD2	PE=1	SV=3
Q9BZF3-3	Isoform 3 of Oxysterol-binding protein-related protein 6	OSBPL6	1	0	1						OSBPL6
Q9H7L9	Sin3 histone deacetylase corepressor complex component SDS3	SUDS3	2	0	0						SUDS3	PE=1	SV=2
Q9NQX4	Unconventional myosin-Vc	MYO5C	0	2	0						MYO5C	PE=1	SV=2
Q9NVR2	Integrator complex subunit 10	INTS10	1	1	0						INTS10	PE=1	SV=2
Q9NY61	Protein AATF	AATF	1	1	0						AATF	PE=1	SV=1
Q9UKY7,Q9UKY7-2	Protein CDV3 homolog	CDV3	0	2	0						CDV3	PE=1	SV=1
V9HVZ7	Epididymis luminal protein 176	HEL-176	1	1	0						HEL-176	PE=2	SV=1
A0A024QZ63,A0A0D9SFK2,Q92614,Q92614-3,Q92614-4	HCG27198, isoform CRA_c	hCG_27198	0	1	0						hCG_27198	PE=3	SV=1
A0A024QZ75,J3QRB7,Q9UHV7	Mediator of RNA polymerase II transcription subunit 13	THRAP1	1	0	0						THRAP1	PE=3	SV=1
A0A024QZ90,A0A0U4B4U6,B4DL69,B4DS24,F6QDS0,H3BN59,H3BQK0,I3L0H8,I3L352,Q2NL95,Q53G16,Q59FQ9,Q68DY7,Q69YM2,Q7Z4W5,Q9HBZ9,Q9NUU7,Q9NUU7-2,Q9UMR2,Q9UMR2-2,Q9UMR2-3,Q9UMR2-4	HCG1998531, isoform CRA_c	hCG_1998531	1	0	0						hCG_1998531	PE=4	SV=1
A0A024QZD8,A0A024QZE2,A0A0A0MRF3,A0A0S2Z4E5,A0A0S2Z4F2,A0A1X7SBS4,D3DUQ6,H0YE88,H0YEJ9,H0YG62,H0YGS2,P28347,P28347-2,Q15561,Q15561-3,Q15562,Q15562-2,Q15562-4,Q53GI4,Q71U35,Q96G15,Q99594	TEA domain family member 2, isoform CRA_c	TEAD2	0	1	0						TEAD2	PE=4	SV=1
A0A024QZN2,Q8WXX5	HCG2024613, isoform CRA_a	hCG_2024613	1	0	0						hCG_2024613	PE=4	SV=1
A0A024QZN4,A0A384NYN5,B3KXA2,B4E3Q9,P18206,P18206-2,V9HWK2	Metavinculin	VCL	1	0	0						VCL	PE=3	SV=1
A0A024QZV0,Q658S9,Q6EHZ3,Q86UY0,Q8NBS9,Q8NBS9-2	Epididymis secretory sperm binding protein	hCG_1811539	0	0	1						hCG_1811539	PE=2	SV=1
A0A024R005,P54253	Ataxin 1, isoform CRA_c	ATXN1	1	0	0						ATXN1	PE=3	SV=1
A0A024R050,A0A087WT87,A0A087X0U3,B4DF14,B4DHC6,P43003,P43003-2,Q8N169	Amino acid transporter	SLC1A3	1	0	0						SLC1A3	PE=3	SV=1
A0A024R0F6,Q9UPN9,Q9UPN9-2	Tripartite motif-containing 33, isoform CRA_a	TRIM33	1	0	0						TRIM33	PE=4	SV=1
A0A024R0L4,B7Z6N1,P50548,P50548-2	Ets2 repressor factor, isoform CRA_a	ERF	0	0	1						ERF	PE=3	SV=1
A0A024R0V9,A0A1B0GV47,Q7Z4S6,Q7Z4S6-2,Q7Z4S6-3,Q7Z4S6-4,Q7Z4S6-5,Q7Z4S6-6	Kinesin family member 21A, isoform CRA_c	KIF21A	1	0	0						KIF21A	PE=3	SV=1
A0A024R0X8,A0A087WY54,Q15649,Q59GB6	Zinc finger HIT domain-containing protein 3	ZNHIT3	0	1	0						ZNHIT3	PE=4	SV=1
A0A024R101,Q86XZ4	Spermatogenesis associated, serine-rich 2, isoform CRA_a	SPATS2	1	0	0						SPATS2	PE=3	SV=1
A0A024R120,A0A024R2J0,A8KAN5,C9JWL3,F8VX55,Q12800,Q12800-2,Q12800-3,Q12800-4,Q9NZI7,Q9NZI7-4	Transcription factor CP2, isoform CRA_a	TFCP2	1	0	0						TFCP2	PE=3	SV=1
A0A024R178,A0A0S2Z3F2,B4DMG5,P10398,P10398-2,Q59HC8	V-raf murine sarcoma 3611 viral oncogene homolog, isoform CRA_b	ARAF	0	0	1						ARAF	PE=2	SV=1
A0A024R1J3,Q00587,Q00587-2	CDC42 effector protein (Rho GTPase binding) 1, isoform CRA_a	CDC42EP1	1	0	0						CDC42EP1	PE=3	SV=1
A0A024R1M6,B3KQ09,Q9UGY1,V9GYY5	Nucleolar protein 12	MGC3731	0	1	0						MGC3731	PE=3	SV=1
A0A024R1S8,A8K1D2,B4DIC4,B4DJI4,C9J9W2,Q14847,Q14847-2,Q14847-3	LIM and SH3 domain protein 1	LASP1	0	1	0						LASP1	PE=4	SV=1
A0A024R1X6	Keratin 14 (Epidermolysis bullosa simplex, Dowling-Meara, Koebner), isoform CRA_a	KRT14	1	0	0						KRT14	PE=3	SV=1
A0A024R297,Q9Y657	Spindlin, isoform CRA_a	SPIN	0	0	1						SPIN	PE=3	SV=1
A0A024R2M8,A8K146,D2CPI8,D2CPJ1,D2CPJ9,D9I4E1,Q01831,Q01831-2,X5DRB1	Xeroderma pigmentosum, complementation group C, isoform CRA_a	XPC	0	1	0						XPC	PE=3	SV=1
A0A024R2Q8,Q9UHA2	Synovial sarcoma translocation gene on chromosome 18-like 2, isoform CRA_a	SS18L2	0	1	0						SS18L2	PE=3	SV=1
A0A024R2U6,P52756	RNA binding motif protein 5, isoform CRA_a	RBM5	1	0	0						RBM5	PE=3	SV=1
A0A024R305,F8W6N3,Q92560	Ubiquitin carboxyl-terminal hydrolase	BAP1	0	1	0						BAP1	PE=3	SV=1
A0A024R395,F8W7U8,P49959,P49959-2,P49959-3	Double-strand break repair protein	MRE11A	0	1	0						MRE11A	PE=3	SV=1
A0A024R3A6,Q8IY63,Q8IY63-2,Q8N209	Angiomotin like 1, isoform CRA_a	AMOTL1	0	0	1						AMOTL1	PE=3	SV=1
A0A024R3U3,Q7Z7F7,Q7Z7F7-2	Mitochondrial ribosomal protein L55, isoform CRA_a	MRPL55	0	0	1						MRPL55	PE=4	SV=1
A0A024R3V0,Q9NUQ6,Q9NUQ6-2	DNA polymerase-transactivated protein 6, isoform CRA_a	DNAPTP6	0	1	0						DNAPTP6	PE=3	SV=1
A0A024R3X7,A0A384N6A4,B8ZZL8,P61604,Q9UNM1,S4R3N1	Heat shock 10kDa protein 1 (Chaperonin 10), isoform CRA_d	HSPE1	0	1	0						HSPE1	PE=3	SV=1
A0A024R3Y6,B2R5M8,O75874,Q6FI37,Q6FIA4,V9HW78	Isocitrate dehydrogenase [NADP]	IDH1	1	0	0						IDH1	PE=2	SV=1
A0A024R4A5,Q6Y7W6,Q6Y7W6-4,Q6Y7W6-5	Trinucleotide repeat containing 15, isoform CRA_a	TNRC15	0	1	0						TNRC15	PE=4	SV=1
A0A024R4H6,B8K1J4,M0QYU8,P49862,P49862-2,X2J289	Kallikrein 7 (Chymotryptic, stratum corneum), isoform CRA_b	KLK7	1	0	0						KLK7	PE=4	SV=1
A0A024R4Y9,A0A087WYP2,Q8IZQ5	Chromosome 11 open reading frame 31	C11orf31	0	1	0						C11orf31	PE=4	SV=1
A0A024R592,B4DIW2,B4DJ30,B4DSM6,B4DZ53,E9PKU7,F5H6X6,Q14697,Q14697-2,V9HWJ0	Glucosidase, alpha neutral AB, isoform CRA_b	GANAB	0	1	0						GANAB	PE=3	SV=1
A0A024R5C2,F5H6B6,F5H8A0,Q86TN4,Q86TN4-2,Q86TN4-3,Q86TN4-4	tRNA phosphotransferase 1, isoform CRA_b	TRPT1	1	0	0						TRPT1	PE=3	SV=1
A0A024R5G7,Q7Z2W9,Q7Z2W9-2	Mitochondrial ribosomal protein L21, isoform CRA_a	MRPL21	0	1	0						MRPL21	PE=3	SV=1
A0A024R5K8,A8K259,B4DN87,E9PIG2,E9PJH8,E9PK86,E9PMI5,E9PNX1,E9PPV6,E9PQ34,E9PR70,E9PRS3,P50454,Q9NPA9	Collagen-binding protein	SERPINH1	0	1	0						SERPINH1	PE=3	SV=1
A0A024R5N9,A0A0U1RQH1,A0A0U1RQP0,A0A0U1RR07,Q9HCH5,Q9HCH5-11,Q9HCH5-12,Q9HCH5-13,Q9HCH5-14,Q9HCH5-15,Q9HCH5-2,Q9HCH5-4,Q9HCH5-6,Q9HCH5-7,Q9HCH5-8,Q9HCH5-9	Synaptotagmin-like 2, isoform CRA_b	SYTL2	1	0	0						SYTL2	PE=4	SV=1
A0A024R652,A0A384N5Y3,B7Z809,F5H2F4,P11586,V9GYY3,V9GZ78	C-1-tetrahydrofolate synthase, cytoplasmic	MTHFD1	1	0	0						MTHFD1	PE=3	SV=1
A0A024R658,B4DG15,G3V2D5,G3V2P5,G3V515,Q07352	Zinc finger protein 36, C3H type-like 1, isoform CRA_a	ZFP36L1	1	0	0						ZFP36L1	PE=4	SV=1
A0A024R6K5,A0A2D1PGY7,B4DW58,G3V314,H0YJL6,H0YJN0,Q9UI08,Q9UI08-2,Q9UI08-3,Q9UI08-4,Q9UI08-5	Ena/VASP-like protein	EVL	0	1	0						EVL	PE=2	SV=1
A0A024R6S1,O60884	DnaJ (Hsp40) homolog, subfamily A, member 2, isoform CRA_a	DNAJA2	0	1	0						DNAJA2	PE=3	SV=1
A0A024R6U7,A0A0S2Z517,A0A5F9ZH94,A0A5F9ZHT7,B3KQN7,B3KQV4,B4DM06,H3BRH0,H3BSJ6,Q9Y653,Q9Y653-2,Q9Y653-3,Q9Y653-5	ADGRG1 C-terminal fragment	GPR56	1	0	0						GPR56	PE=2	SV=1
A0A024R745,C9IZN5,F8WAS3,H7BYD0,Q16718	Complex I subunit B13	NDUFA5	1	0	0						NDUFA5	PE=3	SV=1
A0A024R7C9,B3KUU8,B4DJ53,P50570,P50570-2,P50570-3,P50570-4,P50570-5,Q6ZSZ9,Q8N1K8,Q9UPH5	Dynamin GTPase	DNM2	1	0	0						DNM2	PE=4	SV=1
A0A024R7P2,B2R8G6,B7Z6M0,M0R2K9,Q14318,Q14318-2	Peptidylprolyl isomerase	FKBP8	1	0	0						FKBP8	PE=4	SV=1
A0A024R7U6,A0A3B3IS57,A0A3B3IT92,A0A3B3IU45,B3KMX0,B4DLA6,E5RG31,P33991	DNA helicase	MCM4	1	0	0						MCM4	PE=3	SV=1
A0A024R7Z5,B4DHN5,B4DQ93,E9PBU7,G5EA09,O00560,O00560-2,O00560-3	Syndecan binding protein (Syntenin), isoform CRA_c	SDCBP	1	0	0						SDCBP	PE=4	SV=1
A0A024R863,B1AMB1,B1AMB2,Q9BPZ7,Q9BPZ7-2,Q9BPZ7-3,Q9BPZ7-5,Q9BPZ7-6	Mitogen-activated protein kinase 2-associated protein 1	MAPKAP1	0	1	0						MAPKAP1	PE=3	SV=1
A0A024R889,A0A0D9SF54,A0A0D9SGF6,A0A384P5S9,Q13813,Q13813-2,Q13813-3	Spectrin, alpha, non-erythrocytic 1 (Alpha-fodrin), isoform CRA_g	SPTAN1	0	1	0						SPTAN1	PE=3	SV=1
A0A024R8A7,Q96I24	HCG31253, isoform CRA_a	hCG_31253	0	1	0						hCG_31253	PE=4	SV=1
A0A024R8D4,Q9Y399	Mitochondrial ribosomal protein S2, isoform CRA_a	MRPS2	0	1	0						MRPS2	PE=3	SV=1
A0A024R8L8,B7ZLH8,K7EKI0,Q92817	Envoplakin, isoform CRA_a	EVPL	1	0	0						EVPL	PE=4	SV=1
A0A024R9K4,H9KVD1,H9KVD5,Q96QD9,Q96QD9-2,Q96QD9-4	Forty-two-three domain-containing protein 1	FYTTD1	1	0	0						FYTTD1	PE=3	SV=1
A0A024R9L1,A8K6F0,B0AZM4,O60306	RNA helicase aquarius	AQR	0	1	0						AQR	PE=3	SV=1
A0A024R9Q1,P07996,P07996-2	Thrombospondin 1, isoform CRA_a	THBS1	0	0	1						THBS1	PE=3	SV=1
A0A024RAD5,A0A0C4DGS1,P39656,P39656-2,P39656-3	Dolichyl-diphosphooligosaccharide--protein glycosyltransferase 48 kDa subunit	DDOST	1	0	0						DDOST	PE=3	SV=1
A0A024RBV9,A0A2R8YFW3,O60907,O60907-2,Q59F53	Transducin (Beta)-like 1X-linked, isoform CRA_a	TBL1X	0	1	0						TBL1X	PE=4	SV=1
A0A024RC49,A0A087WUY7,A4ZVS7,A4ZVS8,B4DGW0,O75925,O75925-2,O75928,O75928-2,O75928-3,Q1XBU8,Q2TA77	Protein inhibitor of activated STAT, 2, isoform CRA_a	PIAS2	0	1	0						PIAS2	PE=3	SV=1
A0A024RC67,O43663,O43663-2,O43663-4	Protein regulator of cytokinesis 1, isoform CRA_e	PRC1	0	1	0						PRC1	PE=4	SV=1
A0A024RC97,E9PLE4,E9PS47,Q9BVG9	L-serine-phosphatidylethanolamine phosphatidyltransferase	PTDSS2	0	1	0						PTDSS2	PE=3	SV=1
A0A024RCA1,A0A0J9YWD5,A0A0J9YX88,A0A0J9YYB5,B7ZM65,B7ZM66,E9PJ24,F8WEF5,Q9P1Y6,Q9P1Y6-2,Q9P1Y6-3	CTD-binding SR-like protein rA9, isoform CRA_a	KIAA1542	0	0	1						KIAA1542	PE=4	SV=1
A0A024RCN6,A0A0G2JJT9,A0A140T954,A0A1U9X9A1,A0A1U9X9A3,A0A1U9X9C1,A0A1U9X9C4,A0A1U9X9C7,A0A1U9X9C8,A0A1U9X9D5,A2ABF4,B4DT32,P26640	Valyl-tRNA synthetase	VARS	0	1	0						VARS	PE=1	SV=1
A0A024RCS7,A0A1U9X7Y0,B4DMA8,B4E063,Q9BW19	Kinesin-like protein	KIFC1	0	1	0						KIFC1	PE=3	SV=1
A0A024RCU9,D6RBM8,H3BLV9,Q96SB4,Q96SB4-3,Q96SB4-4	SFRS protein kinase 1, isoform CRA_e	SRPK1	0	1	0						SRPK1	PE=4	SV=1
A0A024RDQ8,B4DKE6,P40938,P40938-2,Q5U0C2	Replication factor C (Activator 1) 3, 38kDa, isoform CRA_a	RFC3	1	0	0						RFC3	PE=4	SV=1
A0A024RE02,A8K2S7,B3KW74,B7Z6T7,Q8NBM4,Q8NBM4-2,Q8NBM4-3,Q8NBM4-4,X6R5E5	Phosphoglycerate dehydrogenase like 1, isoform CRA_c	PHGDHL1	1	0	0						PHGDHL1	PE=4	SV=1
A0A024RE15,O15018,O15018-2	HCG2039413, isoform CRA_a	hCG_2039413	1	0	0						hCG_2039413	PE=4	SV=1
A0A075B749,A0A087WX83,E9PQG4,Q5VU43,Q5VU43-13,Q5VU43-2,Q5VU43-3,Q5VU43-4,Q5VU43-6,Q5VU43-7	Myomegalin	PDE4DIP	1	0	0						PDE4DIP	PE=1	SV=2
A0A087WUL4,A0A087WX23,A0A087WXK2,A0A087WZG9,B4DSP0,Q86TG7,Q86TG7-2	Retrotransposon-derived protein PEG10	PEG10	0	0	1						PEG10	PE=1	SV=2
A0A087WUW6,A0A087X0G7,A0A087X1B1,D3DWY0,Q9Y6K9,Q9Y6K9-2	NF-kappa-B essential modulator	IKBKG	0	0	1						IKBKG	PE=1	SV=1
A0A087WV29,Q9H0A0,Q9H0A0-2	RNA cytidine acetyltransferase	NAT10	1	0	0						NAT10	PE=1	SV=1
A0A087WVE9,Q7Z3A3,Q9HBZ2,Q9HBZ2-2,X5D7T2,X5D8U0,X5DP31,X5DP40,X5DQN9	Aryl hydrocarbon receptor nuclear translocator 2	ARNT2	1	0	0						ARNT2	PE=1	SV=1
A0A087WVF5,A0A0A0MRC4,A0A0A0MSK4,Q86YR5,Q86YR5-3,Q86YR5-4	G-protein-signaling modulator 1	GPSM1	0	1	0						GPSM1	PE=1	SV=1
A0A087WVH3,Q3KNS1	Patched domain-containing protein 3	PTCHD3	1	0	0						PTCHD3	PE=4	SV=1
A0A087WVQ6,Q00610,Q00610-2	Clathrin heavy chain	CLTC	1	0	0						CLTC	PE=1	SV=1
A0A087WW81,A1L0S8,A1L0S9,B1AKD8,Q5TZA2	Rootletin (Fragment)	CROCC	0	0	1						CROCC	PE=1	SV=6
A0A087WY71,B4DFM1,B4DJB1,B4DNB9,B4DTI4,B7Z4N2,C9JJ47,E9PFW3,Q96CW1,Q96CW1-2	AP-2 complex subunit mu	AP2M1	0	1	0						AP2M1	PE=1	SV=1
A0A087X1K7	NF-kappa-B essential modulator (Fragment)	IKBKG	0	1	0						IKBKG	PE=1	SV=1
A0A087X1W0,A6NI72,A8MVU1,B4DQ63,B4E3W8,B7ZAL4,C9J155,H7C1S1,P14598,P14598-2	Neutrophil cytosol factor 1 (Fragment)	NCF1	1	0	0						NCF1	PE=4	SV=1
A0A087X295,B3KRR8,B4E256,E9PBK6,E9PDU5,Q6AZD6,Q6PKC6,Q8NDH0,Q9H9M3,Q9NNW5	WD repeat-containing protein 6	WDR6	0	1	0						WDR6	PE=1	SV=1
A0A087X296,A0A2R8YDM0,P23219,P23219-2,P23219-3,P23219-4,P23219-5,P23219-6	Cyclooxygenase-1	PTGS1	1	0	0						PTGS1	PE=1	SV=1
A0A087X2I1	26S proteasome regulatory subunit 10B	PSMC6	1	0	0						PSMC6	PE=1	SV=1
A0A087X2I5,O75243,Q9UK45	U6 snRNA-associated Sm-like protein LSm7	LSM7	1	0	0						LSM7	PE=1	SV=1
A0A0A0MRK1,A8KAG1,B4DVU2,E9PAV9,E9PPY4,F2Z3C6,Q5T3I0,Q5T3I0-2,Q5T3I0-3	G patch domain-containing protein 4	GPATCH4	0	1	0						GPATCH4	PE=1	SV=1
A0A0A0MRP6,B7ZLQ5,D7EZH4,P28370,P28370-2,Q86UA8	Probable global transcription activator SNF2L1	SMARCA1	0	1	0						SMARCA1	PE=1	SV=1
A0A0A0MRT6,B6VEX3,B6VEX4,B6VEX5,Q8IZP0,Q8IZP0-10,Q8IZP0-12,Q8IZP0-2,Q8IZP0-3,Q8IZP0-4,Q8IZP0-5,Q8IZP0-6,Q8IZP0-7,Q8IZP0-8,Q8IZP0-9	Abl interactor 1	ABI1	0	1	0						ABI1	PE=1	SV=1
A0A0A0MRX1,B1AM48,Q12926,Q12926-2	ELAV-like protein	ELAVL2	1	0	0						ELAVL2	PE=1	SV=1
A0A0A0MS07	Immunoglobulin heavy constant gamma 1 (Fragment)	IGHG1	0	0	1						IGHG1	PE=1	SV=1
A0A0A0MSL1,B2RBR1,Q8TDM6,Q8TDM6-2,Q8TDM6-4,Q8TDM6-5	Disks large homolog 5 (Fragment)	DLG5	0	1	0						DLG5	PE=1	SV=1
A0A0A0MSN9,A0A0A0MT02,A0A1U9X830,A0A1U9X839,B7Z6T4,H9ZYJ1,P18615,P18615-3,P18615-4	Negative elongation factor E (Fragment)	NELFE	0	1	0						NELFE	PE=1	SV=6
A0A0A0MT49,A0A2R8Y440,A0A2R8Y4C5,A0A2R8Y4P4,A0A2R8Y526,A0A2R8Y583,A0A2R8Y6N0,A0A2R8Y6V2,A0A2R8Y7F3,A0A2R8Y7R0,A0A2R8Y7S2,A0A2R8Y7Y7,A0A2R8YDA1,A0A2R8YF58,A0A2R8YF80,A0A2R8YG32,A0A2R8YGG3,A0A2R8YGP5,A7E2E1,B9EGQ8,P51532,P51532-2,P51532-3,P51532-4,P51532-5,Q59FZ6,Q9HBD4	Transcription activator BRG1	SMARCA4	0	1	0						SMARCA4	PE=1	SV=1
A0A0A0MTS7,Q8WZ42-12	Titin	TTN	1	0	0						TTN	PE=1	SV=1
A0A0A6YYH1,Q7Z6K5,Q7Z6K5-2	Arpin	C15orf38-AP3S2	0	0	1						C15orf38-AP3S2	PE=3	SV=1
A0A0B4J1R6,A0A0K0K1H9,B3KPZ8,B3KSI4,B4DVU1,B4E022,P29401,P29401-2,Q53EM5,V9HWD9	Transketolase	TKT	1	0	0						TKT	PE=1	SV=1
A0A0B4J259,B2R4C5,F8VV32,P61626	1,4-beta-N-acetylmuramidase C	LYZ	1	0	0						LYZ	PE=1	SV=1
A0A0C4DGF8,A0A1B0GU48,A0A1B0GV09,A0A1B0GWF6,Q9H9B1,Q9H9B1-3	Histone-lysine N-methyltransferase EHMT1 (Fragment)	EHMT1	1	0	0						EHMT1	PE=1	SV=1
A0A0D9SEM4,A8K644,Q08170,Q53F45,Q59EF5	Serine/arginine-rich-splicing factor 4 (Fragment)	SRSF4	1	0	0						SRSF4	PE=1	SV=1
A0A0G2JHI1,A0A0G2JKR7,A0A0S2Z4M5,A0A0S2Z570,B7Z7J5,J3JS71,P28702,P28702-3,Q06310,Q5STP9	Retinoic acid receptor RXR-beta (Fragment)	RXRB	0	1	0						RXRB	PE=1	SV=1
A0A0G2JIC6,B0S7P4,Q9Y676	28S ribosomal protein S18b, mitochondrial	MRPS18B	1	0	0						MRPS18B	PE=1	SV=1
A0A0G2JMZ6,A0A7I2V492,A0A7I2V581,A1L179,O60282,O60282-2	Kinesin-like protein (Fragment)	KIF5C	0	1	0						KIF5C	PE=1	SV=1
A0A0J9YX90,A0A0J9YXP8,A0A0J9YYH3,A0A1W6AYU6,A0A2R8Y6C7,A0A2U3TZU2,B4DE36,B4DVJ0,K7EQ48,P06744,P06744-2	Glucose-6-phosphate isomerase (Fragment)	GPI	0	0	1						GPI	PE=1	SV=1
A0A0S2PZM4,B2WTI3,B2WTI4,K7EJU9,Q6NYC1,Q6NYC1-2,Q6NYC1-3	Bifunctional arginine demethylase and lysyl-hydroxylase JMJD6	JMJD6	1	0	0						JMJD6	PE=4	SV=1
A0A0S2Z366,B4DJE7,B4DVB1,B4DWX6,B7Z9I1,P11310,P11310-2,Q5HYG7,Q5T4U5	Medium-chain specific acyl-CoA dehydrogenase, mitochondrial (Fragment)	ACADM	1	0	0						ACADM	PE=2	SV=1
A0A0S2Z4L5,A0A0S2Z559,B4E0X2,B4E1N6,D7PBN3,H7C155,L7RRS6,P04049,P04049-2	V-raf-1 murine leukemia viral oncogene-like protein 1 isoform 3 (Fragment)	RAF1	0	0	1						RAF1	PE=2	SV=1
A0A0S2Z4V5,A0A0S2Z556,O60828,O60828-2,O60828-4,O60828-5	Polyglutamine tract-binding protein 1 (Fragment)	PQBP1	0	0	1						PQBP1	PE=2	SV=1
A0A0S2Z563,A0A0S2Z5D2,A0A0S2Z5H0,E5RFH3,E5RGC7,E5RK86,H0YAT2,Q53G62,Q9Y2Q9	Mitochondrial ribosomal protein S28 isoform 1 (Fragment)	MRPS28	0	1	0						MRPS28	PE=2	SV=1
A0A0S2Z5J4,A8K586,O00203,O00203-3	Adaptor-related protein complex 3 beta 1 subunit isoform 1 (Fragment)	AP3B1	0	1	0						AP3B1	PE=2	SV=1
A0A0S2Z6V5,Q8IYU8	EF-hand domain family member A1 isoform 1 (Fragment)	EFHA1	0	1	0						EFHA1	PE=2	SV=1
A0A0U1RQF0,P49327	3-hydroxyacyl-[acyl-carrier-protein] dehydratase	FASN	1	0	0						FASN	PE=1	SV=1
A0A140T998,P28062,P28062-2,Q5JNW7,Q6FHU0,X5CMJ9,X5D2R7	Proteasome subunit beta type-8	PSMB8	1	0	0						PSMB8	PE=1	SV=1
A0A140VJH9,B4DFR2,H3BNG9,H3BPA0,Q7Z4M1,Q8TF09,Q9NP97,Q9NP97-2	Dynein light chain roadblock	DYNLRB2	0	1	0						DYNLRB2	PE=2	SV=1
A0A140VJP5,B4DEX8,P31153,P31153-2	S-adenosylmethionine synthase		0	1	0
A0A140VJW2,A2A2D0,B5BU83,P16949,P16949-2,Q96CE4	Stathmin		0	1	0
A0A140VK27,B4DEH5,P09960,P09960-2,Q59ES1	Leukotriene A(4) hydrolase		1	0	0
A0A140VK37,F2Z2Q9,G5E9R5,O75702,P24666,P24666-4,Q59EH3	Acid phosphatase		1	0	0
A0A140VK42,A8K781,E9PM69,P17980,R4GNH3	Testicular secretory protein Li 42		1	0	0
A0A140VK44,G3V295,G3V3I1,G3V3U4,G3V5Z7,P60900,P60900-2,Q9BZ93	Proteasome subunit alpha type		1	0	0
A0A140VK46,P28070	Proteasome subunit beta		1	0	0
A0A140VKE5,A8K477,A8K4C2,O00391,O00391-2	Sulfhydryl oxidase	QSCN6	1	0	0						QSCN6	PE=2	SV=1
A0A146IHP0,A4D2Q0,A7MCZ7,E9PHI4,H0Y742,H7C3X3,O94901,O94901-2,O94901-3,O94901-5,O94901-7,O94901-8,O94901-9	SUN domain-containing protein 1	SUN1	0	0	1						SUN1	PE=2	SV=1
A0A1B0GTL5,Q2Z1P3,Q9BXF6	Rab11 family-interacting protein 5	RAB11FIP5	1	0	0						RAB11FIP5	PE=1	SV=1
A0A1B0GVI3	Keratin, type I cytoskeletal 10 (Fragment)	KRT10	1	0	0						KRT10	PE=1	SV=1
A0A1P0AYU5,B4DRS6,Q9BWM7,S4R3N9	Sidoreflexin	SFXN3	0	1	0						SFXN3	PE=1	SV=1
A0A1S5UZ27,B3KNJ2,O94806	Serine/threonine-protein kinase	PRKD3	0	1	0						PRKD3	PE=2	SV=1
A0A1U9X8Y4,O00299,Q53FB0,Q5SRT3	Chloride intracellular channel protein		1	0	0
A0A1W2PPI7,B7Z5Y8,D3DQT3,D3DQT4,O75382,O75382-2,O75382-4,Q6ZTE7	Tripartite motif-containing protein 3	TRIM3	0	0	1						TRIM3	PE=1	SV=1
A0A1W2PQ90,A0A494C1B7,Q92878,Q92878-2,Q92878-3	Zinc-hook domain-containing protein		1	0	0
A0A1W2PRB8,A0A1W2PRX4,A0A1W2PS27,A0A384NYG5,B4DSE1,E9PM72,Q9NVC6	Cofactor required for Sp1 transcriptional activation subunit 6		1	0	0
A0A1W2PRR1,B4DQX3,P14625,Q59FC6,Q5CAQ5,Q96GW1,V9HWP2	Endoplasmin	HSP90B1	1	0	0						HSP90B1	PE=1	SV=1
A0A224ANK2,A0A224AV41,P25054,P25054-2,P25054-3,Q4LE70	Adenomatous polyposis coli protein isoform b	APC	0	1	0						APC	PE=2	SV=1
A0A286YFE3,A0A286YFF7,A0A286YFL8,A0A2C9F2P4,B4DWU3,E9PK48,P50897,Q5T0S4	Palmitoyl-protein hydrolase 1	PPT1	1	0	0						PPT1	PE=1	SV=1
A0A2R8Y4F5,A0A2R8Y688,A0A2R8YG21,B4DRH6,E9KL44,H0YFD6,P40939	Enoyl-CoA hydratase	HADHA	1	0	0						HADHA	PE=1	SV=1
A0A2R8Y4W2,A0A2R8YE63,Q12929,Q12929-2	Epidermal growth factor receptor kinase substrate 8	EPS8	1	0	0						EPS8	PE=1	SV=1
A0A2R8Y6S3,C9J167,P54278,Q5FBW8	Mismatch repair endonuclease PMS2	PMS2	1	0	0						PMS2	PE=1	SV=1
A0A2R8Y6X2,A0A2R8YCT7,Q496C9,Q8TEA8	D-aminoacyl-tRNA deacylase	DTD1	1	0	0						DTD1	PE=1	SV=1
A0A2R8Y7I4,A0A2R8YD45,A0A2R8YDY1,A0A2R8YGD1,B4DIV8,B4DSE2,B4E0C7,D3DQU2,O14773,O14773-2,Q53HP2	Tripeptidyl-peptidase 1	TPP1	1	0	0						TPP1	PE=1	SV=1
A0A2R8YD85,Q96BY6,Q96BY6-3	Dedicator of cytokinesis protein 10	DOCK10	0	1	0						DOCK10	PE=1	SV=1
A0A2R8YDB8,B3KRT9,H7BXF5,Q9H0E3,Q9H0E3-3	Histone deacetylase complex subunit SAP130	SAP130	1	0	0						SAP130	PE=1	SV=1
A0A2R8YFE2	Actin, cytoplasmic 1 (Fragment)	ACTB	1	0	0						ACTB	PE=1	SV=1
A0A2X0SF71,C9IZD3,I3L1S9,I3L4P0,Q68EM7,Q68EM7-2,Q68EM7-4,Q68EM7-5,Q68EM7-6	ARHGAP17 (Fragment)	ARHGAP17	1	0	0						ARHGAP17	PE=4	SV=1
A0A2X0TVV1,Q96PE2	ARHGEF17 (Fragment)	ARHGEF17	0	0	1						ARHGEF17	PE=4	SV=1
A0A2X0U4N6,Q6XZF7	Dynamin-binding protein (Fragment)	DNMBP	0	1	0						DNMBP	PE=4	SV=1
A0A384ME24,O00422,O00422-2	Histone deacetylase complex subunit SAP18		0	1	0
A0A384MTQ3,P23526	Adenosylhomocysteinase		1	0	0
A0A384N6C2,A0A7I2V2T3,A0A7I2YQK5,E7ETK5,H0Y4R1,P12268	Inosine-5'-monophosphate dehydrogenase	IMPDH	1	0	0						IMPDH	PE=2	SV=1
A0A384N6H1,P13639,Q8TA90	Epididymis secretory sperm binding protein		1	0	0
A0A384NKS6,B4DW11,H0YAS8,H0YC35,P10909,P10909-2,P10909-3,P10909-4,P10909-5,P10909-6	Clusterin		1	0	0
A0A384NPU2,A0A6Q8PGQ8,D6RC06,D6RD60,D6RE99,D6REP8,H0YC49,P49773	Epididymis secretory sperm binding protein	HINT1	0	0	1						HINT1	PE=2	SV=1
A0A3B3IRJ5,D6RDU8,Q9P2B7,Q9P2B7-2	Cilia- and flagella-associated protein 97 (Fragment)	CFAP97	1	0	0						CFAP97	PE=1	SV=1
A0A3B3IRW3,A0A3B3ITX4,E9PN17,O75964	ATP synthase subunit g, mitochondrial	ATP5MG	0	1	0						ATP5MG	PE=3	SV=1
A0A3B3IS95,A0A5F9ZHM4,A8MW50,C9J7H8,P07195,Q5U077	L-lactate dehydrogenase		0	1	0
A0A3B3ISH6,Q5HYL4,Q86U38,Q86U38-2	Nucleolar protein 9 (Fragment)	NOP9	0	1	0						NOP9	PE=1	SV=1
A0A3B3ITK7,P36871	Phosphoglucomutase-1	PGM1	0	0	1						PGM1	PE=1	SV=1
A0A3B3ITW3,B4DL07,B4DZ22,P28288,P28288-2	ATP-binding cassette sub-family D member 3	ABCD3	1	0	0						ABCD3	PE=1	SV=2
A0A3B3IU42	Gem-associated protein 2	GEMIN2	0	1	0						GEMIN2	PE=1	SV=1
A0A3G9CLN8,A0A481SHK9,A0A650F0N3,A0N071,B2M1S7,C8C504,D9YZU5,P02042,P68871,Q6VFQ5,Q6VFQ6,Q9UK54	Beta globin (Fragment)	hbb	1	0	0						hbb	PE=3	SV=1
A0A494C0J7,Q08188	TGc domain-containing protein		1	0	0
A0A494C1J1,B2RMV2,F8WAN1,Q59GT7,Q69YQ0,Q69YQ0-2	Cytospin-A	SPECC1L	0	0	1						SPECC1L	PE=1	SV=1
A0A4D5RA86,A0A4D5RAA2,A0A4D5RAA5,A0A4D5RAB7,A0A4D5RAG0,A0A4D5RAI5,A0A4D5RAU4,B4DL19,P04083,Q5TZZ9	Annexin		1	0	0
A0A5C2FSV3,A0A5C2FT88,A0A5C2FTB2,A0A5C2FTU6,A0A5C2FTW4,A0A5C2FU12,A0A5C2FU82,A0A5C2FUK2,A0A5C2FV37,A0A5C2FV64,A0A5C2FVD3,A0A5C2FVG5,A0A5C2FVH4,A0A5C2FVK8,A0A5C2FVL1,A0A5C2FVL4,A0A5C2FVN1,A0A5C2FVT7,A0A5C2FVU4,A0A5C2FW07,A0A5C2FWD1,A0A5C2FWF3,A0A5C2FX72,A0A5C2FX73,A0A5C2FX95,A0A5C2FXB5,A0A5C2FXJ4,A0A5C2FXV9,A0A5C2FY01,A0A5C2FY54,A0A5C2FY68,A0A5C2FY81,A0A5C2FY88,A0A5C2FY93,A0A5C2FYX4,A0A5C2FYY8,A0A…	IGL c31_light_IGLV1-40_IGLJ2 (Fragment)		0	1	0
A0A5C2FTJ9,A0A5C2FTL9,A0A5C2FTQ3,A0A5C2FUP6,A0A5C2FUS6,A0A5C2FUZ3,A0A5C2FVE6,A0A5C2FVV3,A0A5C2FW06,A0A5C2FWZ2,A0A5C2FXJ8,A0A5C2FXX8,A0A5C2FY49,A0A5C2FYW8,A0A5C2FYX5,A0A5C2FZ41,A0A5C2FZ51,A0A5C2FZ72,A0A5C2FZA4,A0A5C2FZF0,A0A5C2FZI9,A0A5C2FZJ8,A0A5C2FZK3,A0A5C2FZQ3,A0A5C2FZT3,A0A5C2G021,A0A5C2G065,A0A5C2G0N1,A0A5C2G0V8,A0A5C2G1F2,A0A5C2G1H0,A0A5C2G1P9,A0A5C2G1R7,A0A5C2G1Z4,A0A5C2G269,A0A5C2G281,A0A…	IGL c22_light_IGLV1-51_IGLJ2 (Fragment)		0	1	0
A0A5C2FTW3,A0A5C2FUA0,A0A5C2FV46,A0A5C2FW53,A0A5C2FYU5,A0A5C2FZT4,A0A5C2G1W4,A0A5C2GCU1,A0A5C2GTI6	IGL c418_light_IGKV3-20_IGKJ2 (Fragment)		1	0	0
A0A5C2FYD8,A0A5C2G4S4,A0A5C2G9U5,A0A5C2GGU5,A0A5C2GVG9,A0A5C2GZ68	IGL c1912_light_IGKV4-1_IGKJ5 (Fragment)		0	1	0
A0A5C2G0A4,A0A5C2G0C7,A0A5C2G1F7,A0A5C2G5Q3,A0A5C2GC94,A0A5C2GFK6,A0A5C2GYQ8,A0A5C2GYW7	IGL c1970_light_IGKV3-20_IGKJ2 (Fragment)		0	1	0
A0A5C2G1L6,A0A5C2G2D2,A0A5C2GM79,A0A5C2GVP4	IGL c2440_light_IGLV2-11_IGLJ1 (Fragment)		0	0	1
A0A5C2G3J2	IGL c2515_light_IGKV1D-39_IGKJ2 (Fragment)		0	1	0
A0A5C2GCF4	IGH + IGL c358_light_IGKV3-15_IGKJ1 (Fragment)		0	1	0
A0A5C2GCS0	IG c82_heavy_IGHV1-18_IGHD7-27_IGHJ6 (Fragment)		1	0	0
A0A6I8PIP7,A0A6I8PIT3,A0A6I8PIV1,A0A6I8PL42,A0A6I8PLB3,A0A6I8PLB8,A0A6I8PRS0,A0A6I8PS05,A0A6I8PTV8,B2RCM2,B4DER1,B4E266,Q9P2J5,Q9P2J5-2	Leucyl-tRNA synthetase	LARS1	1	0	0						LARS1	PE=1	SV=1
A0A6Q8PF29,A0A6Q8PFW4,A0A6Q8PGN3,A0A6Q8PH25,A0A6Q8PH71,A0A6Q8PHA2,A0A6Q8PHG2,Q27J81,Q27J81-2	Inverted formin-2	INF2	1	0	0						INF2	PE=1	SV=1
A0A6Q8PFE4	Actin, cytoplasmic 1	ACTB	1	0	0						ACTB	PE=1	SV=1
A0A6Q8PFI8,B3KVN0,B4DDR6,B4DKW1,P11166,Q59GX2	Solute carrier family 2, facilitated glucose transporter member 1	SLC2A1	0	1	0						SLC2A1	PE=1	SV=1
A0A6Q8PH13,A0A6Q8PH87,A0A6Q8PHP8,Q86WG5,Q86WG5-3,Q9H032	Myotubularin-related protein 13	SBF2	0	1	0						SBF2	PE=1	SV=1
A0A6Q8PHH2,B3KVJ2,B4DG18,B7Z4D9,E7EUP3,O95251,O95251-2,O95251-3,O95251-4,O95251-5	Histone acetyltransferase KAT7	KAT7	1	0	0						KAT7	PE=1	SV=1
A0A7I2SVS4,B7Z8G5,B7Z8I2,B7Z8L3,P56524,P56524-2,Q53SM2	Histone deacetylase 4	HDAC4	0	0	1						HDAC4	PE=4	SV=1
A0A7I2V2M3,A0A7I2V3K6,A0A7I2V3N2,A0A7I2V3U3,A0A7I2V4S8,A0A7I2V607,A0A7I2V613,A0A7I2V640,A0A7I2V685,A0A7I2YQC8,A0A7I2YQF8,A0A7I2YQI2,A0A7I2YQI6,A0A7I2YQT9,A0A7I2YQU2,Q13347,Q53HU7,Q5TFK1,Q5U0F4	Eukaryotic translation initiation factor 3 subunit I	EIF3I	1	0	0						EIF3I	PE=4	SV=1
A0A7I2V351,A0A7I2V3Z3,A0A7I2V487,A0A7I2YQE1,A8K7D9,J3KS65,J3QLL0,P52292,Q7Z726	Importin subunit alpha-1	KPNA2	0	1	0						KPNA2	PE=4	SV=1
A0A7I2V3T6,A0A7I2V5Y3,A0A7I2YQL2,D6RDG3,H0Y9Y1,P20290,P20290-2	Transcription factor BTF3	BTF3	0	0	1						BTF3	PE=4	SV=1
A4D1E9,A4D1E9-2,A4D1E9-3,C9J8R7,C9JEQ8,C9JNI1,F8WBB5,F8WBY0,F8WCN4	GTP-binding protein 10	GTPBP10	1	0	0						GTPBP10	PE=1	SV=1
A4D1I0,B7ZLX4,D6W5R0,Q9ULJ8,Q9ULJ8-3,Q9ULJ8-4,Q9ULJ8-5	HCG1741805, isoform CRA_c	PPP1R9A	0	0	1						PPP1R9A	PE=4	SV=1
A4D2N6,A4D2N7,B4DWG7,C9JPC9,E7EWZ4,Q9H9J4,Q9H9J4-2	Ubiquitin specific protease 42	USP42	0	1	0						USP42	PE=4	SV=1
A4D7U3,A4D7U7,A4D7U9,A4D7V5,B3KY57,B8ZZU6,E9PBF9,F5H629,P15336,P15336-2,P15336-4,P15336-5	Activating transcription factor 2 splice variant ATF2-var0	ATF2	0	1	0						ATF2	PE=2	SV=1
A6NGP5	Jupiter microtubule-associated homolog 2	JPT2	0	1	0						JPT2	PE=1	SV=2
A6NHR2,H0Y4J2,Q6TGK8,Q9BZE1,S4R369	39S ribosomal protein L37, mitochondrial	MRPL37	0	1	0						MRPL37	PE=1	SV=2
A6PVP4,B7ZBQ1,B7ZBQ3,Q9H944,Q9H944-2	Mediator of RNA polymerase II transcription subunit 20 (Fragment)	MED20	1	0	0						MED20	PE=1	SV=1
A6PVX3,P55036,P55036-2,Q5VWC4	26S proteasome non-ATPase regulatory subunit 4 (Fragment)	PSMD4	0	0	1						PSMD4	PE=1	SV=1
A8K168,B4DX99,P48163,P48163-2,Q8WVX2	Malic enzyme		1	0	0
A8K2R3,O60341,O60341-2,R4GMP9,R4GMQ1	cDNA FLJ75083, highly similar to Homo sapiens amine oxidase (flavin containing) domain 2 (AOF2),mRNA		1	0	0
A8K2U0,Q6ZWK7	Alpha-2-macroglobulin-like protein 1	A2ML1	1	0	0						A2ML1	PE=1	SV=3
A8K3Q8,A8K4B1,O75635,O75635-2,Q6MZG5	cDNA FLJ75069, highly similar to Homo sapiens serpin peptidase inhibitor, clade B (ovalbumin), member 7 (SERPINB7), mRNA		1	0	0
A8K5N5,B0AZM8,B0AZN7,B4DRV1,P22735	cDNA FLJ78142, highly similar to Homo sapiens transglutaminase 1 (K polypeptide epidermal type I, protein-glutamine-gamma-glutamyltransferase), mRNA		1	0	0
A8K6A2,E9PC52,Q16576,Q16576-2,Q5JNZ6,Q6FHQ0	cDNA FLJ77317, highly similar to Homo sapiens retinoblastoma binding protein 7 (RBBP7), mRNA		0	1	0
A8K6H6,B4DNZ0,Q15678	Tyrosine-protein phosphatase non-receptor type		1	0	0
A8K701,P35475,P35475-2,Q56A80	cDNA FLJ77574, highly similar to Homo sapiens iduronidase, alpha-L- (IDUA), mRNA		0	1	0
A8K710,B4DQ47,D4Q8H0,Q9NYL2-2	cDNA FLJ77428, highly similar to Homo sapiens sterile alpha motif and leucine zipper containing kinase AZK (ZAK), transcript variant 2, mRNA		1	0	0
A8K761,H3BPJ9,O96000	Complex I-PDSW	NDUFB10	0	1	0						NDUFB10	PE=2	SV=1
A8K899,O75528	ADA3 homolog		1	0	0
A8K8Q0,H0Y6F5,Q9H4I2	cDNA FLJ78753, highly similar to Homo sapiens zinc fingers and homeoboxes 3 (ZHX3), mRNA		0	1	0
A8K9C6,B4DER8,F5H4S8,O95644,O95644-10,O95644-11,O95644-17,O95644-2,O95644-3,O95644-4,O95644-5,O95644-6,O95644-8	cDNA FLJ76687, highly similar to Homo sapiens nuclear factor of activated T-cells, cytoplasmic, calcineurin-dependent 1 (NFATC1), transcript variant 1, mRNA		1	0	0
A8MVZ6,F8VZX7,F8W056,Q96G01,Q96G01-2,Q96G01-3,Q96G01-4	BICD1 protein	BICD1	1	0	0						BICD1	PE=1	SV=3
B1AHE4,Q9UBB4,Q9UBB4-2	Ataxin-10 (Fragment)	ATXN10	1	0	0						ATXN10	PE=1	SV=1
B2R4G1,C9JAW5,C9JNU6,Q9Y241	cDNA, FLJ92076, Homo sapiens likely ortholog of mouse hypoxia induced gene 1(HIG1), mRNA		0	1	0
B2R6D8,Q9H3Q1,Q9H3Q1-2	CDC42 effector protein (Rho GTPase binding) 4, isoform CRA_a	CDC42EP4	1	0	0						CDC42EP4	PE=2	SV=1
B2R9C3,O43739,O43739-2	cDNA, FLJ94328, highly similar to Homo sapiens pleckstrin homology, Sec7 and coiled-coil domains 3 (PSCD3), mRNA		1	0	0
B2RAG9,B4DSK7,Q15648	Mediator of RNA polymerase II transcription subunit 1		1	0	0
B2RAU5,B3KXH8,O95061,Q59ES5,Q9Y5X1	Sorting nexin		0	1	0
B2RBR9,Q14974	cDNA, FLJ95650, highly similar to Homo sapiens karyopherin (importin) beta 1 (KPNB1), mRNA		1	0	0
B2RNR6,B3KP82,Q96KR1	Zinc finger RNA binding protein	ZFR	0	1	0						ZFR	PE=2	SV=1
B3KM81,Q53G26,Q59E88,Q96EY1,Q96EY1-2,Q96EY1-3	cDNA FLJ10471 fis, clone NT2RP2000045, highly similar to DnaJ homolog subfamily A member 3, mitochondrial		1	0	0
B3KN52,H0Y6R1,Q59EC1,Q9UBP9,Q9UBP9-3,Q9UBP9-4	cDNA FLJ13606 fis, clone PLACE1010579, highly similar to Homo sapiens GULP, engulfment adaptor PTB domain containing 1 (GULP1), mRNA		0	1	0
B3KNP9,B3KRF7,B3KVN6,E9PC66,P17029	cDNA FLJ30114 fis, clone BNGH42000532, highly similar to Zinc finger with KRAB and SCAN domain-containing protein 1		0	0	1
B3KPM8,B7Z6X7,B7ZAA7,Q8N5C6,Q8N5C6-2	cDNA FLJ31974 fis, clone NT2RP7008167, weakly similar to 85.1 kDa PROTEIN IN GREB-FEOA INTERGENIC REGION		0	1	0
B3KRV2,P49674,Q53EZ1,Q5U045	cDNA FLJ34950 fis, clone NT2RP7017284, highly similar to Casein kinase I isoform epsilon		0	1	0
B3KT18	Glutamate dehydrogenase		1	0	0
B3KTL1,B4DHB7,F2Z2C8,Q9BVH7,V5N4G2	cDNA FLJ38439 fis, clone FEBRA2016739, highly similar to Alpha-N-acetylgalactosaminidealpha-2,6-sialyltransferase 5		1	0	0
B3KW21,Q8WUI6,Q9Y678	cDNA FLJ41945 fis, clone PLACE6019676, highly similar to Coatomer subunit gamma		1	0	0
B4DDZ4,B4E1S2,P09525,Q6LES2,Q6P452,V9HW59	Annexin		1	0	0
B4DEA3,B7Z4W4,B7ZA74,H0Y579,P54727,P54727-2,Q53F10	UV excision repair protein RAD23		0	0	1
B4DEQ7,Q96II8,Q96II8-2,Q96II8-3,Q96II8-4	cDNA FLJ50003, highly similar to Homo sapiens leucine-rich repeats and calponin homology (CH) domain containing 3 (LRCH3), mRNA		0	1	0
B4DHG3,E7ETU9,O00469,O00469-2	Procollagen-lysine 5-dioxygenase		0	1	0
B4DHH6,H3BSM9,Q9NSC2,Q9NSC2-2,V9HVY5	cDNA FLJ55320, highly similar to Sal-like protein 1		1	0	0
B4DJB3,Q8IUX7,Q8IUX7-2	cDNA FLJ55979, highly similar to Homo sapiens AE binding protein 1 (AEBP1), mRNA		0	1	0
B4DJL6,B4DVT3,B4DWZ3,H3BRY6,Q96SY0,Q96SY0-3,Q96SY0-4	Integrator complex subunit 14	INTS14	1	0	0						INTS14	PE=1	SV=1
B4DKI6,B7ZW82,D6RGC9,D6RID8,D6RIT7,D6RJD3,Q13888,Q6P1K8,Q86U80,R4GMS9	cDNA FLJ55412, highly similar to TFIIH basal transcription factor complex p44 subunit		0	1	0
B4DKJ0,B4DRW1,P19013	cDNA FLJ58539, highly similar to Keratin, type II cytoskeletal 4		1	0	0
B4DKM0,E7ETU7,E9PF06,H0Y9G6,P09001	cDNA FLJ51883, highly similar to Mitochondrial 39S ribosomal protein L3		0	0	1
B4DL04	Receptor protein-tyrosine kinase		1	0	0
B4DL08,Q5THR1,Q9H5Z1,Q9H5Z1-2	RNA helicase		1	0	0
B4DLF4,E9PIS4,E9PJN0,E9PMC4,H0Y698,H7C5A7,O14734,Q6FHI2,Q9BR14	cDNA FLJ60669, highly similar to Acyl-coenzyme A thioesterase 8		1	0	0
B4DLW4,K7EL81,Q9BZL4-3,Q9BZL4-4,Q9BZL4-5	cDNA FLJ60300, highly similar to Homo sapiens protein phosphatase 1, regulatory (inhibitor) subunit 12C (PPP1R12C), mRNA		0	1	0
B4DN31	cDNA FLJ55809		1	0	0
B4DNG7	cDNA FLJ57753, highly similar to Melanoma-associated antigen D2		1	0	0
B4DNH1,C9J0J7,C9J712,C9JQ45,D3DNI2,D3DNI3,G5E9Q6,P35080,P35080-2	Profilin		1	0	0
B4DPT5,B4E1C6,P24298	cDNA FLJ50023, highly similar to Alanine aminotransferase 1		1	0	0
B4DRL5,B4DZ20,B7Z1S8,H0YCM7,Q5JVZ5,Q5JVZ8,Q96JJ3,Q96JJ3-3	cDNA FLJ60834, highly similar to Engulfment and cell motility protein 2 (CED-12 homolog A)		1	0	0
B4DSA7,F5GZ90,Q9NZJ0	cDNA FLJ60847, highly similar to Homo sapiens denticleless homolog (DTL), mRNA		0	1	0
B4DSM4,Q9BYG3	cDNA FLJ57495, highly similar to MKI67 FHA domain-interacting nucleolar phosphoprotein		0	0	1
B4DSR7,O75177,O75177-2	cDNA FLJ58470, highly similar to SS18-like protein 1		0	1	0
B4DSZ6,P48735,P48735-2,Q13584,Q53GL5	IDP		0	1	0
B4DVP8	cDNA FLJ53411, highly similar to Centrosomal protein of 68 kDa (Fragment)		0	1	0
B4DX26,B4E3N9,Q9UN79	cDNA FLJ58547, highly similar to SOX-13 protein		0	1	0
B5BU24,P31946,V9HWD6	14-3-3 protein beta/alpha	YWHAB	0	0	1						YWHAB	PE=2	SV=1
B7WP74,Q9HCG8	Pre-mRNA-splicing factor CWC22 homolog (Fragment)	CWC22	1	0	0						CWC22	PE=1	SV=1
B7Z2T7,O15075,O15075-2	cDNA FLJ60535, highly similar to Serine/threonine-protein kinase DCAMKL1		0	1	0
B7Z3B5,F2Z2J1,Q15349,Q15349-2,Q15349-3,X5DNZ1	Non-specific serine/threonine protein kinase	RPS6KA2	0	1	0						RPS6KA2	PE=1	SV=1
B7Z3B6,B7Z7H8,E7EWW5,H0YAZ8,H0YB53,O43312,O43312-2,O43312-4,O43312-5,Q6ZT16	cDNA FLJ55977, highly similar to Metastasis suppressor protein 1		1	0	0
B7Z7P2	cDNA FLJ61633, highly similar to Homo sapiens ubiquitin associated protein 2 (UBAP2), transcript variant 1, mRNA		1	0	0
B7Z8F0,Q6ZVM7,Q6ZVM7-2	cDNA FLJ52529, highly similar to Homo sapiens target of myb1-like 2 (TOM1L2), transcript variant 1, mRNA		0	0	1
B7ZA12,P49759,P49759-3	cDNA, FLJ79026, highly similar to Dual specificity protein kinase CLK1 (EC2.7.12.1)		0	1	0
B7ZBH1,P56537	Eukaryotic translation initiation factor 6 (Fragment)	EIF6	1	0	0						EIF6	PE=1	SV=1
B7ZL93,G5E994,Q5VW38,Q5VW38-2,Q5VW38-3	GPR107 protein (Fragment)	GPR107	1	0	0						GPR107	PE=2	SV=1
C9J8M3,C9JZI1,P35249,P35249-2	Replication factor C subunit 4 (Fragment)	RFC4	0	1	0						RFC4	PE=1	SV=1
C9JJ19,P82930	28S ribosomal protein S34, mitochondrial	MRPS34	0	1	0						MRPS34	PE=1	SV=2
C9JLU1,P52434,P52434-3,P52434-4	DNA-directed RNA polymerases I, II, and III subunit RPABC3 (Fragment)	POLR2H	0	1	0						POLR2H	PE=1	SV=8
C9JU48,H7BZV9,H7C3L3,Q6NXT1	Ankyrin repeat domain-containing protein 54 (Fragment)	ANKRD54	0	1	0						ANKRD54	PE=1	SV=8
D3DSM4,D3DSM5,H7BXV5,P39060,P39060-1,P39060-2,Q8NG19	Collagen, type XVIII, alpha 1, isoform CRA_d	COL18A1	0	1	0						COL18A1	PE=4	SV=1
D6RAG3,D6RI11,O14810	Complexin-1 (Fragment)	CPLX1	1	0	0						CPLX1	PE=1	SV=1
D6RE77,Q8TEU7-2	Rap guanine nucleotide exchange factor 6	RAPGEF6	0	0	1						RAPGEF6	PE=1	SV=1
D9HTE9,P53007,Q6LAP8	Plasma membrane citrate carrier	SLC25A1	0	1	0						SLC25A1	PE=2	SV=1
E5RID6	2,4-dienoyl-CoA reductase [(3E)-enoyl-CoA-producing], mitochondrial	DECR1	0	1	0						DECR1	PE=1	SV=1
E9PBK7,E9PJF0,E9PQW4,L7RXH5,P27361,P27361-2,P27361-3,Q7Z3H5,Q8NHX0	Mitogen-activated protein kinase	MAPK3	0	1	0						MAPK3	PE=1	SV=1
E9PFN5,Q2NLC8,Q6FII1,Q9Y2Q3,Q9Y2Q3-4	Glutathione S-transferase kappa	GSTK1	0	1	0						GSTK1	PE=1	SV=1
E9PFP8,J3QT27,P57721,P57721-2,P57721-3,P57721-4,P57721-5,Q5MJP6	Poly(rC)-binding protein 3	PCBP3	0	1	0						PCBP3	PE=1	SV=1
E9PG32	Dynein heavy chain 12, axonemal	DNAH12	0	0	1						DNAH12	PE=1	SV=2
E9PIN3,E9PQA4,Q59E96,Q9UBU9,Q9UBU9-2	Nuclear RNA export factor 1 (Fragment)	NXF1	1	0	0						NXF1	PE=1	SV=1
E9PKP7	Nucleolar transcription factor 1	UBTF	1	0	0						UBTF	PE=1	SV=1
E9PM92,O00193	Small acidic protein	C11orf58	0	1	0						C11orf58	PE=1	SV=2
E9PPY3,O43159	Ribosomal RNA-processing protein 8	RRP8	0	1	0						RRP8	PE=1	SV=1
F2ZC06,Q15654,Q68D94	Thyroid hormone receptor interacting protein 6 isoform 1	TRIP6i1	0	1	0						TRIP6i1	PE=2	SV=1
F8WAE5,Q9BY44,Q9BY44-2,Q9BY44-3,Q9BY44-4	Eukaryotic translation initiation factor 2A	EIF2A	0	1	0						EIF2A	PE=1	SV=1
G5E9L9,Q4W5L5,Q8N568,Q8N568-2	Doublecortin and CaM kinase-like 2, isoform CRA_c	DCLK2	0	1	0						DCLK2	PE=1	SV=1
H0Y3A3,Q5VWQ8,Q5VWQ8-5	Disabled homolog 2-interacting protein (Fragment)	DAB2IP	1	0	0						DAB2IP	PE=1	SV=1
H0Y5H9	Serpin B4 (Fragment)	SERPINB4	1	0	0						SERPINB4	PE=1	SV=1
H0YHB7	RNA-binding protein Musashi homolog 1 (Fragment)	MSI1	1	0	0						MSI1	PE=1	SV=1
H0YHG0,P82979	Uncharacterized protein (Fragment)		0	1	0
H3BPP2,Q9NRP2	COX assembly mitochondrial protein	CMC2	0	1	0						CMC2	PE=1	SV=1
H3BRC9,Q15046,Q6ZTI3	Lysine--tRNA ligase	KARS1	0	1	0						KARS1	PE=1	SV=1
H7BYI2,H7C051,Q9NZC9	HepA-related protein (Fragment)	SMARCAL1	0	1	0						SMARCAL1	PE=1	SV=1
H7BZC4,P82933,Q86WV4	28S ribosomal protein S9, mitochondrial (Fragment)	MRPS9	1	0	0						MRPS9	PE=1	SV=1
H7C2V1,O60568	Multifunctional procollagen lysine hydroxylase and glycosyltransferase LH3 (Fragment)	PLOD3	0	1	0						PLOD3	PE=1	SV=1
H7C4H2	Signal recognition particle receptor subunit beta (Fragment)	SRPRB	0	1	0						SRPRB	PE=1	SV=1
H7C5Q2,Q9Y305,Q9Y305-2,Q9Y305-3,Q9Y305-4	Acyl-coenzyme A thioesterase 9, mitochondrial (Fragment)	ACOT9	1	0	0						ACOT9	PE=1	SV=1
H9ZYJ2,P10599,P10599-2	Thioredoxin	TXN	1	0	0						TXN	PE=2	SV=1
I0B0K6,I0B0K7,I0B0K8,P20930	Truncated profilaggrin	FLG	1	0	0						FLG	PE=4	SV=1
I3L390,Q86US8,Q86US8-2,Q86US8-3	Telomerase-binding protein EST1A (Fragment)	SMG6	0	1	0						SMG6	PE=1	SV=2
J3KMX1,Q99567	Nuclear pore complex protein Nup88 (Fragment)	NUP88	0	0	1						NUP88	PE=1	SV=1
K7EKI8,K7EQ71,O60437	Periplakin	PPL	1	0	0						PPL	PE=1	SV=1
K7EMI9,K7EMP7,Q9BWC9	Coiled-coil domain-containing protein 106	CCDC106	0	1	0						CCDC106	PE=1	SV=1
K7ESC4,Q6UWP8,Q6UWP8-2	Suprabasin (Fragment)	SBSN	1	0	0						SBSN	PE=1	SV=2
K7ESP4,Q8WVC6	Dephospho-CoA kinase domain-containing protein (Fragment)	DCAKD	1	0	0						DCAKD	PE=1	SV=1
M0QXB4,O14579,O14579-2,O14579-3,Q53HJ6	Coatomer subunit epsilon	COPE	1	0	0						COPE	PE=1	SV=1
M0QZP7	Distal membrane-arm assembly complex protein 2 (Fragment)	DMAC2	1	0	0						DMAC2	PE=1	SV=1
M0R0J1,Q59H51,Q9H4M7,Q9H4M7-2	Pleckstrin homology domain-containing family A member 4 (Fragment)	PLEKHA4	0	0	1						PLEKHA4	PE=1	SV=1
M0R1B0,O43402,Q53Y03	ER membrane protein complex subunit 8 (Fragment)	EMC8	0	1	0						EMC8	PE=1	SV=1
O14983,O14983-2,O14983-3,Q7Z675,Q7Z6E5,Q8N3X5	Sarcoplasmic/endoplasmic reticulum calcium ATPase 1	ATP2A1	0	0	1						ATP2A1	PE=1	SV=1
O43709-3	Isoform 3 of Probable 18S rRNA (guanine-N(7))-methyltransferase	BUD23	0	1	0						BUD23
O60427	Acyl-CoA (8-3)-desaturase	FADS1	1	0	0						FADS1	PE=1	SV=3
O60747	Nucleolar GTP-binding protein 1 (Fragment)		1	0	0
O75420	GRB10-interacting GYF protein 1	GIGYF1	0	1	0						GIGYF1	PE=1	SV=2
O95248,O95248-4,O95248-5	Myotubularin-related protein 5	SBF1	0	1	0						SBF1	PE=1	SV=4
O95470	Sphingosine-1-phosphate lyase 1	SGPL1	1	0	0						SGPL1	PE=1	SV=3
P00568,Q53EY8,Q5T9B7,Q6FGX9	Adenylate kinase isoenzyme 1	AK1	1	0	0						AK1	PE=1	SV=3
P02790	Hemopexin	HPX	0	1	0						HPX	PE=1	SV=2
P05089,P05089-2,P05089-3	Arginase-1	ARG1	1	0	0						ARG1	PE=1	SV=2
P07305,P07305-2	Histone H1.0	H1-0	0	1	0						H1-0	PE=1	SV=3
P08574,Q8TBT6	Cytochrome c1, heme protein, mitochondrial	CYC1	0	1	0						CYC1	PE=1	SV=3
P0C0S5,Q71UI9	Histone H2A.Z	H2AZ1	1	0	0						H2AZ1	PE=1	SV=2
P12273	Prolactin-inducible protein	PIP	0	1	0						PIP	PE=1	SV=1
P18583,P18583-10,P18583-3,P18583-4,P18583-5,P18583-6,P18583-7,P18583-9	Protein SON	SON	1	0	0						SON	PE=1	SV=4
P21675,P21675-10,P21675-11,P21675-12,P21675-2,P21675-3,P21675-4,P21675-5,P21675-6,P21675-7,P21675-8,P21675-9	Transcription initiation factor TFIID subunit 1	TAF1	1	0	0						TAF1	PE=1	SV=2
P26022	Pentraxin-related protein PTX3	PTX3	1	0	0						PTX3	PE=1	SV=3
P28289,P28289-2	Tropomodulin-1	TMOD1	0	1	0						TMOD1	PE=1	SV=1
P29508,P29508-2,Q5K684	Serpin B3	SERPINB3	1	0	0						SERPINB3	PE=1	SV=2
P41091,Q2VIR3,Q2VIR3-2	Eukaryotic translation initiation factor 2 subunit 3	EIF2S3	0	1	0						EIF2S3	PE=1	SV=3
P41162	ETS translocation variant 3	ETV3	0	1	0						ETV3	PE=1	SV=2
P41208	Centrin-2	CETN2	1	0	0						CETN2	PE=1	SV=1
P42695,Q96FA6	Condensin-2 complex subunit D3	NCAPD3	1	0	0						NCAPD3	PE=1	SV=2
P47974	mRNA decay activator protein ZFP36L2	ZFP36L2	0	0	1						ZFP36L2	PE=1	SV=3
P51659-2	Isoform 2 of Peroxisomal multifunctional enzyme type 2	HSD17B4	1	0	0						HSD17B4
P54259,Q59FW4,Q86V38	Atrophin-1	ATN1	0	0	1						ATN1	PE=1	SV=3
P56134,P56134-3,Q53FE1	ATP synthase subunit f, mitochondrial	ATP5MF	0	1	0						ATP5MF	PE=1	SV=3
P57073	Transcription factor SOX-8	SOX8	0	0	1						SOX8	PE=2	SV=1
P59665	Neutrophil defensin 1	DEFA1	1	0	0						DEFA1	PE=1	SV=1
P61956-2	Isoform 2 of Small ubiquitin-related modifier 2	SUMO2	0	1	0						SUMO2
P62191,P62191-2,Q53HB3,Q53XL8	26S proteasome regulatory subunit 4	PSMC1	1	0	0						PSMC1	PE=1	SV=1
P62913-2	Isoform 2 of 60S ribosomal protein L11	RPL11	0	1	0						RPL11
P63172	Dynein light chain Tctex-type 1	DYNLT1	0	1	0						DYNLT1	PE=1	SV=1
P84095,Q6ICQ8	Rho-related GTP-binding protein RhoG	RHOG	0	1	0						RHOG	PE=1	SV=1
Q0H0I4,Q14135,Q14135-2,Q14135-4	Vestigial-like 4 (Fragment)	VGLL4	0	1	0						VGLL4	PE=4	SV=1
Q13442	28 kDa heat- and acid-stable phosphoprotein	PDAP1	0	1	0						PDAP1	PE=1	SV=1
Q13516	Oligodendrocyte transcription factor 2	OLIG2	0	0	1						OLIG2	PE=1	SV=2
Q13829,Q13829-2	BTB/POZ domain-containing adapter for CUL3-mediated RhoA degradation protein 2	TNFAIP1	0	1	0						TNFAIP1	PE=1	SV=1
Q14257,Q14257-2	Reticulocalbin-2	RCN2	0	1	0						RCN2	PE=1	SV=1
Q14789,Q14789-2	Golgin subfamily B member 1	GOLGB1	0	0	1						GOLGB1	PE=1	SV=2
Q15149-8	Isoform 8 of Plectin	PLEC	0	0	1						PLEC
Q15637-5	Isoform 5 of Splicing factor 1	SF1	1	0	0						SF1
Q15828,Q6IBD2	Cystatin-M	CST6	1	0	0						CST6	PE=1	SV=1
Q52LJ0,Q52LJ0-1	Protein FAM98B	FAM98B	1	0	0						FAM98B	PE=1	SV=2
Q53FR4,Q5HYM2,Q96QK1	Vacuolar protein sorting 35 variant (Fragment)		1	0	0
Q53GB0,Q549C5,Q9NS69	Mitochondrial import receptor subunit TOM22 homolog (Fragment)		1	0	0
Q53GN7,Q53H77,Q9BUN6,Q9NP92	Mitochondrial ribosomal protein S30 variant (Fragment)		0	1	0
Q59FV6	Actin-like protein 3 (Fragment)		0	1	0
Q5JUP3	Allograft inflammatory factor 1-like	AIF1L	1	0	0						AIF1L	PE=1	SV=1
Q5RKV6	Exosome complex component MTR3	EXOSC6	0	1	0						EXOSC6	PE=1	SV=1
Q5SYE7-2	Isoform 2 of NHS-like protein 1	NHSL1	0	0	1						NHSL1
Q5VUA4	Zinc finger protein 318	ZNF318	1	0	0						ZNF318	PE=1	SV=2
Q5VWV2,Q8TEW0,Q8TEW0-11,Q8TEW0-2,Q8TEW0-3,Q8TEW0-4,Q8TEW0-6,Q8TEW0-7	Partitioning defective 3 homolog	PARD3	0	0	1						PARD3	PE=1	SV=1
Q5XUX1-2	Isoform 2 of F-box/WD repeat-containing protein 9	FBXW9	0	1	0						FBXW9
Q6FG99	RPLP1 protein	RPLP1	1	0	0						RPLP1	PE=2	SV=1
Q6GQQ9,Q6GQQ9-2	OTU domain-containing protein 7B	OTUD7B	0	1	0						OTUD7B	PE=1	SV=1
Q6NXE6,Q6NXE6-2	Armadillo repeat-containing protein 6	ARMC6	0	1	0						ARMC6	PE=1	SV=2
Q6UVK1	Chondroitin sulfate proteoglycan 4	CSPG4	1	0	0						CSPG4	PE=1	SV=2
Q6ZYL4	General transcription factor IIH subunit 5	GTF2H5	1	0	0						GTF2H5	PE=1	SV=1
Q7Z4B8	MSTP155	MST155	0	1	0						MST155	PE=2	SV=1
Q86TQ8	Dihydrolipoamide acetyltransferase component of pyruvate dehydrogenase complex (Fragment)	DLST	1	0	0						DLST	PE=2	SV=1
Q86U42,Q86U42-2	Polyadenylate-binding protein 2	PABPN1	1	0	0						PABPN1	PE=1	SV=3
Q86W56-4,Q86W56-5	Isoform 4 of Poly(ADP-ribose) glycohydrolase	PARG	0	1	0						PARG
Q86Y56,Q86Y56-2	Dynein assembly factor 5, axonemal	DNAAF5	1	0	0						DNAAF5	PE=1	SV=4
Q8IW75	Serpin A12	SERPINA12	1	0	0						SERPINA12	PE=1	SV=1
Q8IWZ3,Q8IWZ3-4,Q8IWZ3-6	Ankyrin repeat and KH domain-containing protein 1	ANKHD1	0	1	0						ANKHD1	PE=1	SV=1
Q8N5N7,Q8N5N7-2	39S ribosomal protein L50, mitochondrial	MRPL50	0	0	1						MRPL50	PE=1	SV=2
Q8N766,Q8N766-2,Q8N766-3,Q8N766-4	ER membrane protein complex subunit 1	EMC1	1	0	0						EMC1	PE=1	SV=1
Q8TAT2	Fibroblast growth factor-binding protein 3	FGFBP3	0	1	0						FGFBP3	PE=1	SV=1
Q8TDB6,Q8TDB6-2	E3 ubiquitin-protein ligase DTX3L	DTX3L	0	0	1						DTX3L	PE=1	SV=1
Q92529	SHC-transforming protein 3	SHC3	1	0	0						SHC3	PE=1	SV=1
Q96G61	Diphosphoinositol polyphosphate phosphohydrolase 3-beta	NUDT11	0	0	1						NUDT11	PE=1	SV=1
Q96H79	Zinc finger CCCH-type antiviral protein 1-like	ZC3HAV1L	0	1	0						ZC3HAV1L	PE=1	SV=2
Q96QR8	Transcriptional activator protein Pur-beta	PURB	1	0	0						PURB	PE=1	SV=3
Q96RF0-2	Isoform 2 of Sorting nexin-18	SNX18	0	1	0						SNX18
Q96SL4	Glutathione peroxidase 7	GPX7	0	1	0						GPX7	PE=1	SV=1
Q99496	E3 ubiquitin-protein ligase RING2	RNF2	0	1	0						RNF2	PE=1	SV=1
Q9BQ04	RNA-binding protein 4B	RBM4B	0	1	0						RBM4B	PE=1	SV=1
Q9BRS2	Serine/threonine-protein kinase RIO1	RIOK1	0	1	0						RIOK1	PE=1	SV=2
Q9BSH4	Translational activator of cytochrome c oxidase 1	TACO1	0	1	0						TACO1	PE=1	SV=1
Q9BVJ6,Q9BVJ6-3	U3 small nucleolar RNA-associated protein 14 homolog A	UTP14A	0	0	1						UTP14A	PE=1	SV=1
Q9C0D5	Protein TANC1	TANC1	0	1	0						TANC1	PE=1	SV=3
Q9H444	Charged multivesicular body protein 4b	CHMP4B	0	1	0						CHMP4B	PE=1	SV=1
Q9H857-2,Q9H857-3	Isoform 2 of 5'-nucleotidase domain-containing protein 2	NT5DC2	0	0	1						NT5DC2
Q9HCD6,Q9HCD6-2	Protein TANC2	TANC2	1	0	0						TANC2	PE=1	SV=3
Q9HCY8	Protein S100-A14	S100A14	1	0	0						S100A14	PE=1	SV=1
Q9NPG1	Frizzled-3	FZD3	1	0	0						FZD3	PE=1	SV=1
Q9NRX1	RNA-binding protein PNO1	PNO1	0	1	0						PNO1	PE=1	SV=1
Q9NRY2,Q9NRY2-2	SOSS complex subunit C	INIP	1	0	0						INIP	PE=1	SV=1
Q9NUQ3	Gamma-taxilin	TXLNG	0	0	1						TXLNG	PE=1	SV=2
Q9NVM9,Q9NVM9-2	Integrator complex subunit 13	INTS13	1	0	0						INTS13	PE=1	SV=2
Q9NW75	G patch domain-containing protein 2	GPATCH2	0	1	0						GPATCH2	PE=1	SV=1
Q9P227	Rho GTPase-activating protein 23	ARHGAP23	0	1	0						ARHGAP23	PE=1	SV=2
Q9P2N5	RNA-binding protein 27	RBM27	0	1	0						RBM27	PE=1	SV=2
Q9UBF2-2	Isoform 2 of Coatomer subunit gamma-2	COPG2	1	0	0						COPG2
Q9UG98	Uncharacterized protein DKFZp586C1419 (Fragment)	DKFZp586C1419	1	0	0						DKFZp586C1419	PE=2	SV=1
Q9UKL0	REST corepressor 1	RCOR1	1	0	0						RCOR1	PE=1	SV=2
Q9ULL5,Q9ULL5-2	Proline-rich protein 12	PRR12	1	0	0						PRR12	PE=1	SV=3
Q9UN70,Q9UN70-2	Protocadherin gamma-C3	PCDHGC3	0	0	1						PCDHGC3	PE=1	SV=1
Q9Y5S5	DNA polymerase epsilon catalytic subunit	POLE1	0	1	0						POLE1	PE=3	SV=1
Q9Y5T5,Q9Y5T5-2,Q9Y5T5-3,Q9Y5T5-5	Ubiquitin carboxyl-terminal hydrolase 16	USP16	0	1	0						USP16	PE=1	SV=1
Q9Y6A4	Cilia- and flagella-associated protein 20	CFAP20	0	1	0						CFAP20	PE=1	SV=1
