# Supplementary material for: The Nitro Group Reshapes the Effects of Pyrido[3,4-g]quinazoline Derivatives on DYRK/CLK Activity and RNA Splicing in Glioblastoma Cells
Source: Cancers (Basel). 2024 Feb 19;16(4):834. doi: 10.3390/cancers16040834 (PMC10886777; doi:10.3390/cancers16040834)
Supplement: Supplementary file 1 [file cancers-16-00834-s001.zip › Supporting Table S4.xlsx]

## Sheet: Fg_expression
Supporting Table 4 (Related to Figure 7). RNAseq analysis of gene expression in control GBM cells or GBM cells treated for 6 or 24 hours with 2.
GeneID	Gene Name	Gene Type	control_rep1	control_rep2	control_rep3	2-6hour_rep1	2-6hour_rep2	2-6hour_rep3	2-24hour_rep1	2-24hour_rep2	2-24hour_rep3
ENSG00000130513,6	GDF15	protein_coding	4.2154	3.2261	4.39077	23.5908	20.5761	24.9471	40.6674	49.6363	42.1796
ENSG00000124762,13	CDKN1A	protein_coding	59.8513	61.0782	77.2131	219.596	235.004	268.995	318.536	327.104	311.085
ENSG00000161513,11	FDXR	protein_coding	14.7025	17.3781	14.9677	35.9294	34.1354	47.357	71.7793	82.5651	81.1324
ENSG00000107796,13	ACTA2	protein_coding	11.7145	14.9736	13.9555	27.3589	32.8151	32.7777	62.5016	60.1476	60.1989
ENSG00000162490,6	DRAXIN	protein_coding	5.35276	4.4544	3.82476	11.9828	10.7698	10.4954	23.097	14.9838	26.3115
ENSG00000159388,5	BTG2	protein_coding	16.9244	15.9613	19.8111	37.5403	38.113	39.4371	51.379	54.7782	51.5996
ENSG00000168702,17	LRP1B	protein_coding	6.07706	5.89263	4.19301	2.89819	1.65621	1.55509	1.02328	0.56804	0.701016
ENSG00000026103,21	FAS	protein_coding	4.27172	5.09266	5.38871	17.9974	12.9926	15.2945	20.1935	15.8119	18.5829
ENSG00000130766,4	SESN2	protein_coding	16.9264	16.6808	15.4606	43.771	48.5496	51.3763	37.1211	28.3533	37.7206
ENSG00000134574,11	DDB2	protein_coding	52.8862	51.4534	58.2118	95.0825	86.7393	96.0541	130.457	146.672	133.02
ENSG00000136048,13	DRAM1	protein_coding	7.17502	5.74191	4.52113	11.2861	13.3121	11.3285	17.5553	18.8056	18.9139
ENSG00000181026,14	AEN	protein_coding	32.601	29.0935	28.3282	53.3008	55.7792	57.4246	63.6537	49.8843	71.3162
ENSG00000164938,13	TP53INP1	protein_coding	6.83527	6.09505	5.55832	11.9274	11.2178	11.5342	14.3327	11.2932	13.9725
ENSG00000181019,12	NQO1	protein_coding	90.9492	88.2169	107.874	254.595	252.304	255.008	205.59	212.809	219.733
ENSG00000076864,19	RAP1GAP	protein_coding	16.8426	13.0044	14.0676	6.17076	6.90103	6.7092	5.53301	4.40742	5.39294
ENSG00000170017,12	ALCAM	protein_coding	38.8513	35.226	29.9916	16.2243	15.2282	14.533	15.7217	13.4621	17.0268
ENSG00000120251,19	GRIA2	protein_coding	31.0449	35.763	25.1004	16.3444	14.8439	15.4911	11.6932	11.233	11.4371
ENSG00000143217,8	NECTIN4	protein_coding	0.150894	0.069625	0.104074	0.963188	1.47079	1.91112	2.67961	2.99748	2.66118
ENSG00000196576,14	PLXNB2	protein_coding	76.759	84.2823	67.7964	114.825	123.163	138.621	150.582	123.679	170.209
ENSG00000132692,18	BCAN	protein_coding	186.782	198.992	182.53	112.197	114.708	133.797	96.721	92.3904	105.006
ENSG00000174307,6	PHLDA3	protein_coding	21.2828	19.7543	21.7283	38.1962	52.302	48.3457	49.3426	43.4342	50.5929
ENSG00000080546,13	SESN1	protein_coding	5.18653	7.0146	6.39426	13.7027	12.6024	16.2403	16.0369	16.3224	17.5358
ENSG00000130226,16	DPP6	protein_coding	3.29169	3.21798	4.08144	1.82837	1.58346	1.69152	0.350726	0.62611	0.603076
ENSG00000227268,3	KLLN	protein_coding	0.640927	0.675738	0.462981	1.71131	1.46121	1.81056	2.71224	2.13431	3.01148
ENSG00000148219,16	ASTN2	protein_coding	8.53351	7.59066	8.16831	8.43157	8.3523	8.12379	18.8956	18.9447	18.4826
ENSG00000036672,15	USP2	protein_coding	4.83212	4.2836	3.90933	8.21873	8.25912	7.82944	9.69737	9.14654	10.4244
ENSG00000184371,13	CSF1	protein_coding	7.69803	8.7995	8.21382	18.5078	20.5539	19.8189	18.0012	13.3889	18.8082
ENSG00000173846,12	PLK3	protein_coding	8.00796	8.23326	9.38325	14.4267	17.7175	20.243	21.1834	25.8826	23.6823
ENSG00000116514,16	RNF19B	protein_coding	6.77113	5.47879	4.66051	13.0267	12.5569	13.7647	14.7954	11.2588	13.681
ENSG00000103044,10	HAS3	protein_coding	1.04931	1.33156	0.816531	3.32748	2.7557	3.35192	3.92384	3.35722	6.50819
ENSG00000154080,13	CHST9	protein_coding	1.99874	1.8786	1.99125	0.541727	0.825933	0.464008	0.360166	0.187816	0.213401
ENSG00000146555,18	SDK1	protein_coding	19.5936	21.9567	13.5741	12.2822	12.5396	10.8782	7.85282	5.79285	7.44547
ENSG00000134247,9	PTGFRN	protein_coding	48.2738	39.7699	49.7244	56.4495	53.8314	59.1406	102.138	133.651	98.8607
ENSG00000244509,3	APOBEC3C	protein_coding	8.86269	01,08,4464	5.10684	13.9851	12.3437	10.4382	26.5247	16.1283	27.367
ENSG00000241860,6	AL627309,5	processed_transcript	9.34117	9.2273	6.79468	7.54619	6.7129	5.12835	2.57221	1.91046	1.82038
ENSG00000115884,10	SDC1	protein_coding	45.3435	41.5454	41.1363	60.4323	59.5691	72.6114	72.584	63.5274	84.2686
ENSG00000115129,13	TP53I3	protein_coding	31.5462	32.1956	46.0881	47.0954	53.3454	62.1233	87.0224	92.5005	93.9234
ENSG00000055163,19	CYFIP2	protein_coding	37.6028	42.6818	32.993	46.8391	45.6818	49.1876	66.8535	61.8953	90.815
ENSG00000157873,17	TNFRSF14	protein_coding	2.12678	1.90825	2.68663	2.63003	2.53202	3.02404	8.63779	8.70564	7.64367
ENSG00000135679,23	MDM2	protein_coding	66.44	62.6947	40.6429	134.854	130.245	137.729	114.164	116.71	131.794
ENSG00000106003,12	LFNG	protein_coding	34.3537	27.7246	37.339	48.0175	47.9961	59.1404	67.3785	71.026	71.2704
ENSG00000048392,11	RRM2B	protein_coding	28.4295	20.6513	18.9379	39.1842	35.8752	39.1639	46.6429	38.2686	51.1549
ENSG00000154654,14	NCAM2	protein_coding	12.6373	10.713	8.95087	6.22539	5.14913	3.04668	3.23019	2.39062	3.41043
ENSG00000182378,13	PLCXD1	protein_coding	70.0351	74.0425	67.5197	52.3577	53.499	55.0876	42.1566	35.9796	47.1046
ENSG00000183087,14	GAS6	protein_coding	2.05984	3.10068	2.43065	2.41936	2.43547	3.63698	8.04002	7.9488	8.19544
ENSG00000170855,3	TRIAP1	protein_coding	38.8185	39.678	53.4581	77.06	80.982	85.6777	100.344	135.523	105.184
ENSG00000149792,8	MRPL49	protein_coding	24.2305	24.1549	28.6699	39.127	44.1431	46.615	46.4356	50.4003	55.0569
ENSG00000101638,13	ST8SIA5	protein_coding	16.8474	15.3735	17.5892	20.2761	21.0063	22.8817	28.9334	24.1294	30.1742
ENSG00000198695,2	MT-ND6	protein_coding	202.999	150.037	134.541	115.021	134.784	116.085	74.2307	51.8835	66.6019
ENSG00000095752,6	IL11	protein_coding	4.005	3.40198	3.99227	8.19838	11.2036	9.91955	10.7863	14.1471	10.3721
ENSG00000168918,13	INPP5D	protein_coding	0.254307	0.345729	0.305194	0.500655	1.39332	0.944391	2.05515	2.01491	2.32668
ENSG00000106366,8	SERPINE1	protein_coding	28.1785	29.5867	29.7898	35.4132	33.355	37.8256	48.7912	45.5059	47.7594
ENSG00000175274,18	TP53I11	protein_coding	88.915	97.3494	105.779	59.5352	65.4244	69.4744	56.5071	44.9951	51.564
ENSG00000167992,12	VWCE	protein_coding	3.91651	4.56915	3.79431	7.4619	6.48807	7.36823	9.15102	11.4513	10.6244
ENSG00000180447,6	GAS1	protein_coding	149.481	131.431	122.272	84.8548	85.8304	95.7413	80.3009	57.4307	80.7467
ENSG00000131080,14	EDA2R	protein_coding	4.49081	4.35593	5.0913	11.5606	11.0628	9.50551	10.5505	8.38726	10.8076
ENSG00000167196,13	FBXO22	protein_coding	29.8533	26.9756	28.4566	51.5187	53.4529	52.0421	54.2224	47.244	45.3985
ENSG00000164237,8	CMBL	protein_coding	39.234	34.4802	40.3758	53.2496	53.9878	49.3734	74.2615	56.0137	69.2443
ENSG00000177098,8	SCN4B	protein_coding	2.70847	1.28564	1.77082	3.81112	1.69429	3.40333	7.30428	7.08128	8.03065
ENSG00000166130,14	IKBIP	protein_coding	35.8927	36.4363	39.6235	50.8939	52.5658	52.877	60.965	68.1631	67.6593
ENSG00000162975,4	KCNF1	protein_coding	35.5939	34.1512	30.9161	39.4174	40.207	44.1717	51.2887	47.6198	56.7129
ENSG00000179750,15	APOBEC3B	protein_coding	30.286	28.9391	36.3135	46.8086	44.9699	49.9276	58.474	56.239	61.1894
ENSG00000136003,15	ISCU	protein_coding	50.5847	50.5759	62.5354	75.3942	85.3433	80.1368	107.847	128.625	107.423
ENSG00000120889,12	TNFRSF10B	protein_coding	98.7447	97.1492	98.5178	135.586	139.932	147.62	147.516	125.785	144.86
ENSG00000163071,10	SPATA18	protein_coding	7.96269	8.05146	6.10502	8.95354	11.6294	9.79759	14.8694	12.2712	16.9489
ENSG00000155849,15	ELMO1	protein_coding	18.8775	17.3774	19.2309	7.39957	6.11308	6.81787	9.28705	7.02465	6.67226
ENSG00000144810,15	COL8A1	protein_coding	5.30915	6.9742	6.67603	8.02277	10.4808	10.2502	2.27831	2.09342	3.07586
ENSG00000168394,11	TAP1	protein_coding	13.7045	14.486	14.1783	22.3738	21.6775	21.1471	23.5567	21.2092	25.7227
ENSG00000163235,15	TGFA	protein_coding	48.3544	50.4502	40.4721	54.5909	50.2207	53.2534	87.2491	62.7053	80.5578
ENSG00000175592,8	FOSL1	protein_coding	8.75313	11.1682	11.318	17.5061	17.6265	19.1105	22.761	19.0503	21.9456
ENSG00000030419,16	IKZF2	protein_coding	3.85045	5.34927	1.93968	2.1524	1.57799	1.75949	0.737944	0.790385	0.971953
ENSG00000078237,6	TIGAR	protein_coding	37.2524	46.3231	40.8821	58.9234	48.4434	61.4204	77.3808	81.465	74.5589
ENSG00000150593,17	PDCD4	protein_coding	42.9658	42.1306	42.3471	64.1021	61.346	60.6866	80.3589	69.7924	66.194
ENSG00000134363,11	FST	protein_coding	4.18394	8.03583	3.48176	11.6883	8.77398	11.4066	14.4338	18.8494	18.1423
ENSG00000128342,4	LIF	protein_coding	2.1137	1.82828	2.04974	3.40732	4.35541	4.72741	4.99955	3.80296	5.80584
ENSG00000135778,11	NTPCR	protein_coding	40.6475	50.8357	58.5397	57.5002	59.7732	73.7115	102.872	115.24	103.991
ENSG00000175161,13	CADM2	protein_coding	28.8785	31.3158	20.1735	13.6919	10.4413	10.481	11.6609	5.87635	11.1647
ENSG00000244694,7	PTCHD4	protein_coding	5.83726	5.56497	3.76614	9.06506	9.00284	7.78718	14.247	8.87912	12.4009
ENSG00000160789,19	LMNA	protein_coding	167.649	179.42	161.409	216.676	215.175	256.908	253.622	240.788	266.665
ENSG00000182132,13	KCNIP1	protein_coding	65.7091	54.5609	76.2761	38.8735	38.9565	37.7384	34.2636	28.7837	33.7832
ENSG00000187957,7	DNER	protein_coding	19.8632	19.6205	23.0905	15.4671	16.0014	17.7379	9.84644	10.4704	11.3402
ENSG00000134853,11	PDGFRA	protein_coding	226.026	224.942	187.002	160.555	156.616	155.537	139.27	105.472	139.002
ENSG00000072210,18	ALDH3A2	protein_coding	45.6458	48.5352	47.7362	88.7487	94.2992	102.333	74.2315	68.1476	71.8022
ENSG00000163516,13	ANKZF1	protein_coding	46.9678	39.3459	48.8105	25.2102	22.6322	23.0386	22.7865	22.0372	18.8848
ENSG00000090776,5	EFNB1	protein_coding	23.379	22.0592	20.6522	29.9282	31.299	36.3507	36.3075	31.4569	34.6152
ENSG00000132819,16	RBM38	protein_coding	30.1087	29.6289	29.1508	39.6997	42.4627	43.3815	43.0008	42.1146	48.5639
ENSG00000214357,8	NEURL1B	protein_coding	9.52087	10.0137	8.11469	16.0698	15.0273	15.3288	17.6751	12.1518	18.2082
ENSG00000105327,17	BBC3	protein_coding	10.1671	7.8427	8.31776	12.3804	14.0972	18.8046	22.4793	19.7545	17.6818
ENSG00000150275,18	PCDH15	protein_coding	24.4202	25.748	20.694	9.95462	11.0416	10.0776	13.4068	7.88324	12.7906
ENSG00000204060,7	FOXO6	protein_coding	14.5071	15.239	13.3523	5.56853	5.70508	5.61209	6.59332	7.02611	6.80436
ENSG00000169760,17	NLGN1	protein_coding	11.2191	11.7887	6.29578	3.47194	2.86064	3.19481	3.11635	1.20108	3.49749
ENSG00000228528,1	AC068057,1	lincRNA	3.78471	2.58693	4.7946	7.1724	9.36353	12.458	14.2952	21.7135	16.2319
ENSG00000152377,13	SPOCK1	protein_coding	27.2414	23.4883	26.0261	25.657	24.8563	22.6845	15.4609	11.4464	15.4957
ENSG00000144645,13	OSBPL10	protein_coding	12.372	14.2795	8.25445	6.01048	5.95861	6.67936	5.45764	3.7473	4.45826
ENSG00000125746,16	EML2	protein_coding	16.2426	15.726	16.189	14.6412	16.5628	18.6146	28.935	26.7137	29.0006
ENSG00000138646,8	HERC5	protein_coding	10.2888	8.86208	9.24451	15.6258	12.4503	13.7132	16.262	15.184	18.2817
ENSG00000156475,18	PPP2R2B	protein_coding	13.1565	9.97934	12.7507	2.945	3.3665	3.30406	5.44526	3.71056	5.64737
ENSG00000142449,12	FBN3	protein_coding	10.9583	8.48167	7.89807	4.51351	5.20503	6.42823	3.79674	3.79839	2.56011
ENSG00000175471,19	MCTP1	protein_coding	13.787	19.0022	12.5512	9.0507	7.59189	8.90996	7.5993	4.33368	5.92817
ENSG00000110900,14	TSPAN11	protein_coding	10.9213	11.3168	7.3371	15.2625	15.2519	14.2176	23.0924	14.7778	21.4415
ENSG00000113328,18	CCNG1	protein_coding	87.066	78.5901	110.533	131.59	139.235	138.785	157.569	163.7	176.292
ENSG00000161714,11	PLCD3	protein_coding	33.0701	21.1784	31.5974	49.6799	39.8221	49.8512	66.6365	51.4383	57.1062
ENSG00000106236,3	NPTX2	protein_coding	2.39589	1.567	2.11667	4.57009	3.93396	3.35475	5.04884	5.01027	6.17435
ENSG00000175265,17	GOLGA8A	protein_coding	48.743	57.1573	53.2074	28.664	34.1919	32.1595	33.5334	22.967	30.0747
ENSG00000140451,12	PIF1	protein_coding	30.1572	23.5863	24.0092	10.8484	14.6205	12.8076	11.6921	11.3442	8.50137
ENSG00000197093,10	GAL3ST4	protein_coding	48.1512	45.8736	59.3829	64.646	65.4675	65.8702	98.4329	80.4232	85.6874
ENSG00000117069,14	ST6GALNAC5	protein_coding	31.3861	35.5867	31.1372	27.5868	28.5696	29.8617	57.574	42.6151	53.7311
ENSG00000116717,12	GADD45A	protein_coding	64.7773	64.771	77.2446	92.7635	98.9475	113.801	130.262	153.585	117.834
ENSG00000115318,11	LOXL3	protein_coding	157.187	142.125	159.371	84.6586	87.5764	100.745	99.2893	79.0311	100.156
ENSG00000002822,15	MAD1L1	protein_coding	74.8365	76.9108	76.1203	51.5906	57.0358	57.8695	119.27	126.076	115.842
ENSG00000171617,13	ENC1	protein_coding	117.609	117.822	96.644	133.985	135.434	137.437	167.023	134.565	174.183
ENSG00000181804,14	SLC9A9	protein_coding	3.72626	2.57852	2.1334	1.6023	1.05302	1.61492	0.328442	0.596523	0.644606
ENSG00000132563,15	REEP2	protein_coding	92.129	89.9763	90.11	88.1241	94.6128	101.321	128.96	122.374	133.26
ENSG00000065357,19	DGKA	protein_coding	18.1767	15.4804	20.4103	21.5184	17.7509	26.2787	34.819	36.1089	35.9192
ENSG00000260528,4	FAM157C	lincRNA	4.58302	10.252	3.43781	4.05427	4.19709	1.74263	0.95799	0.284301	0.275887
ENSG00000087088,19	BAX	protein_coding	160.49	144.719	233.54	179.934	214.323	236.05	413.577	432.507	344.476
ENSG00000189283,9	FHIT	protein_coding	2.22573	3.17712	8.21337	1.10527	1.90004	2.21056	0.194639	0.381972	0.118334
ENSG00000101203,16	COL20A1	protein_coding	165.495	175.628	170.355	70.5682	77.3707	96.4834	88.893	96.514	90.4067
ENSG00000113070,7	HBEGF	protein_coding	10.4003	11.0831	13.4999	12.4989	12.8435	14.3285	19.9445	24.0738	23.8815
ENSG00000172893,15	DHCR7	protein_coding	60.5002	66.9171	67.4051	46.0075	46.347	55.0125	40.6351	33.4518	42.0448
ENSG00000260918,1	AC107398,3	sense_overlapping	1.13248	0.741012	0.537124	0.416286	0.368679	0.314258	0.165047	0.085989	0.154737
ENSG00000154767,14	XPC	protein_coding	31.8789	26.3968	26.2081	52.4914	42.6218	54.4093	50.2671	37.2371	54.535
ENSG00000184887,13	BTBD6	protein_coding	21.1476	22.6749	21.9786	31.8298	30.162	31.6258	32.7767	31.341	36.0273
ENSG00000166897,14	ELFN2	protein_coding	2.99877	1.80936	1.34188	0.384057	0.579969	0.484332	0.561344	0.438854	0.691153
ENSG00000178234,12	GALNT11	protein_coding	51.1963	52.4678	50.2751	45.678	48.5009	52.4115	74.2535	64.9023	74.6515
ENSG00000128311,13	TST	protein_coding	15.4276	18.6997	20.8671	25.8206	27.5013	27.3085	36.5742	52.0392	36.1759
ENSG00000168000,14	BSCL2	protein_coding	11.1164	11.3757	16.689	16.2561	17.3504	19.4758	29.8856	81.3297	37.4182
ENSG00000112972,14	HMGCS1	protein_coding	296.763	285.116	277.838	170.602	160.735	169.349	209.938	173.398	209.211
ENSG00000125633,10	CCDC93	protein_coding	45.397	39.0428	38.1082	38.6732	36.2856	32.2798	26.1369	19.1045	24.6783
ENSG00000099365,10	STX1B	protein_coding	8.72626	7.20448	5.88633	3.54	4.39069	3.69343	3.53127	2.85437	3.04944
ENSG00000135164,18	DMTF1	protein_coding	147.396	160.338	125.898	122.894	137.605	124.867	95.0592	62.5037	86.092
ENSG00000116678,19	LEPR	protein_coding	3.67291	4.12636	3.21865	2.50241	2.44376	2.43483	1.68943	1.46276	1.81778
ENSG00000198589,11	LRBA	protein_coding	11.9292	12.8221	11.1853	7.64908	6.97706	6.80408	6.3842	6.38945	8.02708
ENSG00000163050,16	COQ8A	protein_coding	4.84182	6.15532	5.05349	8.29418	7.57161	8.50045	9.1271	11.0547	10.5665
ENSG00000235609,7	AF127577,4	lincRNA	2.55957	2.48034	2.05097	0.970618	1.038	1.45523	1.01271	0.816613	0.935742
ENSG00000184408,9	KCND2	protein_coding	95.4152	90.1473	60.4884	40.5815	35.9104	34.0764	44.5853	27.9072	45.2134
ENSG00000225783,7	MIAT	lincRNA	21.4473	24.7364	19.1398	14.2275	17.0893	13.7398	13.5611	9.35616	12.5497
ENSG00000180155,19	LYNX1	protein_coding	2.57261	2.57285	2.09829	1.80224	2.78589	2.82018	4.62844	5.16998	7.54381
ENSG00000116001,15	TIA1	protein_coding	151.584	132.441	128.391	134.824	129.515	123.221	91.9833	76.0965	96.0027
ENSG00000184319,15	RPL23AP82	transcribed_unprocessed_pseudogene	32.1005	30.1026	40.6595	44.2726	45.3044	48.8571	61.6233	52.6708	61.9967
ENSG00000131771,13	PPP1R1B	protein_coding	5.97447	4.77082	5.97103	4.36946	3.67299	4.26055	11.669	15.637	12.1745
ENSG00000095739,10	BAMBI	protein_coding	8.95904	9.17863	10.8986	17.858	16.8565	17.2958	16.9916	23.3189	19.0637
ENSG00000124098,9	FAM210B	protein_coding	24.2252	18.9834	19.0395	29.4836	27.9163	27.0652	37.4017	26.5006	38.064
ENSG00000112249,13	ASCC3	protein_coding	13.8831	12.4247	10.9937	16.3096	14.5824	17.1571	18.0038	16.8645	20.4172
ENSG00000064115,10	TM7SF3	protein_coding	75.8068	65.2347	62.4567	69.5984	70.0107	60.4766	99.0667	92.3006	112.415
ENSG00000167615,16	LENG8	protein_coding	79.2992	76.0846	82.293	60.9633	58.0297	54.9143	50.1842	47.333	44.3696
ENSG00000256664,1	AC025423,2	processed_pseudogene	55.3403	33.8615	34.8154	98.1329	106.474	79.2142	106.695	67.9407	110.79
ENSG00000260027,4	HOXB7	protein_coding	21.2776	26.249	26.3577	32.3585	35.3592	34.2482	40.7488	42.328	41.5877
ENSG00000149256,15	TENM4	protein_coding	2.8089	6.55427	2.05623	0.836943	1.64844	0.541473	0.12181	0.456473	0.145259
ENSG00000233276,4	GPX1	polymorphic_pseudogene	137.453	133.8	188.482	192.64	194.738	241.404	279.852	397.755	281.71
ENSG00000148948,7	LRRC4C	protein_coding	9.06383	9.79675	5.93967	1.95897	3.18047	0.981944	2.28965	1.70889	2.2341
ENSG00000251569,1	AC093899,2	protein_coding	2.0406	0.83951	0.485711	01,01,5252	1.26818	0.793677	0	0	0
ENSG00000131584,18	ACAP3	protein_coding	134.234	145.647	119.139	79.1235	82.8557	107.136	81.5501	73.3917	78.3998
ENSG00000175600,15	SUGCT	protein_coding	7.01717	10.0218	12.1301	5.05992	3.89618	5.21664	3.01004	2.77242	3.9018
ENSG00000182175,14	RGMA	protein_coding	10.4292	10.033	11.0338	12.0298	13.7196	14.0366	16.6276	14.8479	17.8426
ENSG00000143819,12	EPHX1	protein_coding	28.9417	26.8287	34.7091	48.3269	51.4257	46.127	49.7918	56.0436	51.8487
ENSG00000128567,16	PODXL	protein_coding	29.4014	25.1459	21.202	43.3044	44.6781	47.7474	48.6229	30.4723	48.5097
ENSG00000137959,15	IFI44L	protein_coding	18.751	22.6021	14.7082	13.0132	10.6373	14.0986	10.0328	6.54757	10.1646
ENSG00000112715,21	VEGFA	protein_coding	215.858	194.735	231.315	124.291	110.324	120.118	144.331	101.378	137.964
ENSG00000183230,16	CTNNA3	protein_coding	10.0572	01,12,2279	6.58986	4.56147	6.57536	8.83681	3.51845	3.42689	3.2402
ENSG00000185420,18	SMYD3	protein_coding	14.4733	19.6197	19.619	11.7718	7.34285	7.88268	7.10402	6.89591	7.4641
ENSG00000060718,21	COL11A1	protein_coding	166.087	166.137	137.25	110.253	119.013	107.918	107.613	73.3262	103.569
ENSG00000184903,9	IMMP2L	protein_coding	19.0161	21.0418	30.5436	10.9445	10.4213	15.7332	7.8969	9.29143	6.18982
ENSG00000213949,8	ITGA1	protein_coding	3.43726	2.01996	1.27138	1.58095	1.91159	2.08478	0.839276	0.34665	0.737501
ENSG00000147202,17	DIAPH2	protein_coding	2.64444	3.75334	2.22564	1.59215	2.21437	1.19823	0.945545	0.398945	1.07043
ENSG00000056736,9	IL17RB	protein_coding	8.53144	9.98855	10.584	6.55592	5.98135	6.24937	4.88564	4.06794	5.44661
ENSG00000130635,15	COL5A1	protein_coding	103.342	115.295	74.3986	64.5377	64.0685	71.546	56.8604	42.0661	62.4638
ENSG00000146006,7	LRRTM2	protein_coding	2.32645	1.63061	1.40925	3.98203	3.64168	5.02878	5.63015	2.61381	5.02292
ENSG00000106992,18	AK1	protein_coding	119.56	146.025	168.654	126.771	162.537	148.412	269.539	346.817	243.994
ENSG00000041515,15	MYO16	protein_coding	1.62611	2.97093	0.82417	1.21399	0.88926	1.42989	0.341216	0.433575	0.174499
ENSG00000138650,8	PCDH10	protein_coding	37.8595	43.0452	33.6958	28.5657	26.8226	34.1345	23.5889	21.0381	25.3273
ENSG00000134107,4	BHLHE40	protein_coding	25.2953	28.7899	26.2605	8.96022	12.5834	9.64225	13.7668	13.7415	16.5864
ENSG00000266074,8	BAHCC1	protein_coding	15.1145	15.7696	10.8614	9.00858	7.38191	10.6273	7.0371	4.56463	8.28004
ENSG00000088826,17	SMOX	protein_coding	6.19124	6.4463	9.18572	16.7179	13.7384	14.9214	14.9525	19.2276	14.0323
ENSG00000075223,13	SEMA3C	protein_coding	4.63989	3.66373	2.41245	1.80913	1.50106	3.2418	1.03529	0.984771	1.3097
ENSG00000131188,11	PRR7	protein_coding	21.1693	23.5231	23.4147	25.3539	26.051	30.0687	35.3684	34.6948	37.4159
ENSG00000144847,12	IGSF11	protein_coding	14.1502	10.2438	12.0829	5.83072	6.45097	5.52793	7.04243	5.7315	5.89552
ENSG00000196072,11	BLOC1S2	protein_coding	49.2032	41.8153	68.5931	83.2188	87.836	88.0994	97.853	114.687	96.642
ENSG00000049860,13	HEXB	protein_coding	77.1951	86.0943	116.339	112.84	110.388	121.966	155.135	206.583	169.649
ENSG00000103742,11	IGDCC4	protein_coding	10.3779	10.4609	10.1593	10.5565	12.4729	11.6116	15.9223	13.2275	15.3074
ENSG00000101938,14	CHRDL1	protein_coding	12.1246	8.47576	11.2196	5.30365	6.45786	5.58509	5.82147	3.19736	5.27952
ENSG00000183098,10	GPC6	protein_coding	17.6828	16.8167	12.7526	9.17921	9.69279	13.0909	9.10571	6.06498	9.1918
ENSG00000144649,8	FAM198A	protein_coding	3.84115	4.95419	2.78188	1.54654	1.56589	2.35737	0.916713	1.17903	1.34942
ENSG00000154978,12	VOPP1	protein_coding	127.446	132.72	123.4	123.064	119.044	124.092	162.068	156.253	178.162
ENSG00000070785,16	EIF2B3	protein_coding	24.8631	26.775	28.0973	28.2674	30.3762	30.5407	38.3721	40.4818	43.4517
ENSG00000198837,9	DENND4B	protein_coding	42.9357	51.3504	39.8096	30.3129	35.1778	33.4545	29.7696	24.8758	26.4258
ENSG00000267680,5	ZNF224	protein_coding	14.4527	13.0921	12.8001	10.2154	10.9991	11.9854	7.85618	5.09131	8.55809
ENSG00000143867,6	OSR1	protein_coding	12.1151	13.599	14.5547	10.0309	8.97176	9.41548	6.51433	6.27644	8.23288
ENSG00000196975,15	ANXA4	protein_coding	14.9999	11.4029	16.228	17.734	9.52543	16.4107	27.1227	35.7662	32.3399
ENSG00000182165,17	TP53TG1	lincRNA	27.1891	33.0752	52.7008	42.0965	40.2093	48.7163	85.4583	108.419	74.9808
ENSG00000119950,20	MXI1	protein_coding	32.2324	28.6948	32.1138	15.3725	14.932	13.3159	19.2436	12.2455	19.955
ENSG00000165886,4	UBTD1	protein_coding	24.563	21.7907	23.9704	23.383	22.4895	27.637	36.5831	36.4355	35.8355
ENSG00000263465,4	SRSF8	protein_coding	18.3077	21.5314	22.424	24.8831	27.5047	29.2399	31.4715	28.231	34.8277
ENSG00000016391,10	CHDH	protein_coding	5.79612	4.78486	4.20344	3.98153	4.11574	5.45309	2.70549	2.2714	2.7924
ENSG00000113916,17	BCL6	protein_coding	27.6207	36.4898	25.9723	20.9311	20.3623	20.0556	16.6521	14.943	19.572
ENSG00000146674,14	IGFBP3	protein_coding	88.8086	76.7524	98.2427	41.0937	41.492	43.2901	58.4616	47.9566	55.9621
ENSG00000198040,10	ZNF84	protein_coding	46.3239	45.7946	41.1535	38.5886	40.2652	35.2533	28.7013	20.2895	31.7491
ENSG00000117318,8	ID3	protein_coding	76.908	90.9584	138.139	137.465	134.941	156.303	206.238	305.001	182.34
ENSG00000285976,1	AL135905,2	protein_coding	23.9329	24.8751	19.0103	32.2267	31.3707	30.6379	31.8561	28.7959	35.997
ENSG00000064042,17	LIMCH1	protein_coding	36.2796	45.4373	27.2115	29.6757	31.0095	29.7983	19.5133	14.83	23.2549
ENSG00000177595,17	PIDD1	protein_coding	18.0312	22.7201	23.1754	30.4352	31.2975	33.2875	33.8078	38.9239	33.469
ENSG00000162643,12	WDR63	protein_coding	0.579949	0.67915	0.845392	1.24996	2.32532	1.2552	2.45345	2.21803	2.78232
ENSG00000109158,10	GABRA4	protein_coding	2.7899	2.34023	2.99104	1.26872	0.802541	1.34786	1.24679	0.59313	1.1232
ENSG00000153094,22	BCL2L11	protein_coding	18.9609	18.5931	15.6202	14.2788	16.0315	18.2794	11.0472	10.2707	11.2235
ENSG00000091428,17	RAPGEF4	protein_coding	13.5297	11.01	12.8267	7.36521	5.48052	9.64448	5.88578	6.04949	5.49473
ENSG00000102445,18	RUBCNL	protein_coding	3.80093	4.47547	4.45133	4.32561	3.70796	3.66508	6.83631	8.0907	9.60271
ENSG00000168061,14	SAC3D1	protein_coding	17.4533	17.9918	21.1416	25.9533	27.9791	39.5805	31.8415	46.8869	36.1178
ENSG00000109046,14	WSB1	protein_coding	152.32	157.619	167.959	94.2456	95.4221	95.7886	85.1858	103.487	98.0954
ENSG00000198786,2	MT-ND5	protein_coding	996.063	772.849	1267.47	699.563	739.45	522.908	576.524	310.976	501.261
ENSG00000132329,10	RAMP1	protein_coding	70.909	65.6576	95.2527	70.5975	82.8747	83.8175	135.52	190.173	133.047
ENSG00000125968,8	ID1	protein_coding	6.24026	5.57359	8.74103	7.14441	12.9944	9.49715	17.3092	19.8653	15.867
ENSG00000153823,18	PID1	protein_coding	11.934	10.6569	14.9382	6.79714	7.11897	5.91242	6.69193	5.28791	6.83597
ENSG00000274956,2	NKAIN3-IT1	lincRNA	1.19865	1.00454	0.609062	0.399071	0.626068	0.406142	0.273465	0.181785	0.265704
ENSG00000185774,15	KCNIP4	protein_coding	3.22395	2.22271	2.58901	1.00227	0.671226	0.490867	0.52724	0.55078	0.52805
ENSG00000150672,17	DLG2	protein_coding	6.95623	4.15747	2.23588	1.69748	1.21511	0.674309	1.22056	0.87674	1.08844
ENSG00000284491,2	THSD8	protein_coding	16.0458	20.3912	22.9244	30.5192	36.2921	50.4503	34.7874	66.2992	41.9878
ENSG00000168899,4	VAMP5	protein_coding	32.0588	31.5872	42.0783	30.8418	30.5853	33.3433	65.2303	71.4563	60.6154
ENSG00000152092,15	ASTN1	protein_coding	18.3832	16.8663	11.4626	10.7133	10.5585	11.4884	9.56286	6.57727	9.02605
ENSG00000204681,10	GABBR1	protein_coding	33.0322	35.6877	28.9669	20.0077	18.9743	26.4919	20.7193	14.4426	19.5663
ENSG00000088387,18	DOCK9	protein_coding	11.6166	15.6617	9.88688	6.87438	3.00667	6.95419	4.97453	4.2552	4.86244
ENSG00000186866,16	POFUT2	protein_coding	49.4109	50.389	48.6178	33.3353	36.1894	40.7807	35.6005	24.6651	32.3728
ENSG00000112984,11	KIF20A	protein_coding	53.4875	47.1934	53.4246	41.5721	41.5923	44.6052	34.0995	25.2886	37.7416
ENSG00000137500,9	CCDC90B	protein_coding	86.0285	83.8266	103.682	124.621	126.046	120.547	143.909	133.514	133.55
ENSG00000076356,6	PLXNA2	protein_coding	12.9344	13.0613	7.85685	5.41609	5.23118	5.6649	5.82984	3.83013	6.9303
ENSG00000108828,15	VAT1	protein_coding	63.6085	65.9357	59.4267	60.1528	64.9206	71.1487	89.0602	72.9758	89.2604
ENSG00000152192,7	POU4F1	protein_coding	8.38467	7.99837	8.37889	4.69861	4.85894	5.21635	5.02136	4.76014	5.13915
ENSG00000180287,16	PLD5	protein_coding	91.3665	92.5629	88.9864	76.7695	66.6652	66.4092	62.3107	51.8187	68.0116
ENSG00000087303,17	NID2	protein_coding	35.3991	39.4159	46.7092	23.98	27.8144	23.0785	22.1592	22.9876	23.7442
ENSG00000261408,7	TEN1-CDK3	protein_coding	1.72156	2.06953	2.07422	0.626787	0.625195	1.03182	0.54616	0.207754	0.772973
ENSG00000177103,13	DSCAML1	protein_coding	1.1417	0.632552	1.53588	0.28674	0.110891	0.191403	0.223391	0.163662	0.31416
ENSG00000142627,12	EPHA2	protein_coding	97.3326	104.693	87.569	120.115	119.708	139.388	144.261	108.664	153.293
ENSG00000178585,14	CTNNBIP1	protein_coding	111.981	111.362	104.718	103.22	109.642	120.659	153.684	171.309	150.843
ENSG00000116337,15	AMPD2	protein_coding	53.5252	61.9994	60.4287	34.4827	31.4285	43.0255	33.2987	24.9365	41.0706
ENSG00000196083,9	IL1RAP	protein_coding	74.7419	76.2854	66.0802	50.3226	45.6986	43.2473	52.1063	37.3759	49.2921
ENSG00000112996,10	MRPS30	protein_coding	39.2997	36.6267	35.9899	47.202	51.5717	53.104	51.8334	60.0889	54.2889
ENSG00000158863,21	FAM160B2	protein_coding	37.7216	36.5413	38.6322	26.4409	29.9685	27.5858	25.3126	22.8349	24.9161
ENSG00000100626,16	GALNT16	protein_coding	4.30749	3.32351	3.19034	2.5375	5.54861	3.0935	1.17201	1.11246	1.40118
ENSG00000100364,18	KIAA0930	protein_coding	21.7694	24.6089	18.3186	28.7616	32.661	31.5359	30.6428	29.5562	33.581
ENSG00000166123,13	GPT2	protein_coding	62.39	63.4462	47.901	66.27	60.9949	72.5184	36.0025	30.9808	41.6301
ENSG00000060138,12	YBX3	protein_coding	196.957	201.777	209.303	240.263	234.373	258.781	261.08	286.065	294.339
ENSG00000179242,15	CDH4	protein_coding	15.7754	17.2338	10.2088	12.043	12.858	12.2071	7.61113	4.49241	8.79107
ENSG00000170734,11	POLH	protein_coding	14.11	24.5909	12.425	32.2204	46.7577	32.029	31.6504	30.6913	48.4848
ENSG00000111641,11	NOP2	protein_coding	63.5953	47.8258	48.7168	51.219	39.8066	45.1865	32.2659	25.9834	34.5482
ENSG00000136160,15	EDNRB	protein_coding	19.4304	18.1536	17.0512	13.5514	13.098	13.2845	11.8587	8.56123	13.3862
ENSG00000121871,3	SLITRK3	protein_coding	11.4031	7.97622	7.08762	7.1678	6.15598	6.04975	01,04,9696	2.24977	4.3591
ENSG00000179094,15	PER1	protein_coding	17.5748	23.7649	19.1933	9.90635	10.2887	12.3692	11.5903	6.84878	12.7849
ENSG00000167632,15	TRAPPC9	protein_coding	24.0197	21.4616	17.2118	11.3081	10.8624	12.5619	12.1616	10.0737	14.7945
ENSG00000196704,11	AMZ2	protein_coding	68.3339	76.1553	81.0617	85.6295	85.2516	72.8227	104.339	136.058	127.868
ENSG00000059804,15	SLC2A3	protein_coding	123.751	123.087	97.6413	65.4523	61.9355	64.8118	81.2988	68.2494	82.7222
ENSG00000173611,17	SCAI	protein_coding	7.35496	5.97573	4.53738	4.87363	3.85125	3.8085	3.242	2.59973	3.47777
ENSG00000123700,4	KCNJ2	protein_coding	0.933769	1.38489	0.550169	2.90331	3.2765	3.50794	3.01465	1.52068	2.82244
ENSG00000260912,1	AL158206,1	sense_overlapping	0.496426	0.589902	0.881558	1.54771	1.86099	2.43435	2.67184	1.867	2.74211
ENSG00000137502,9	RAB30	protein_coding	5.09309	6.08073	2.50044	2.70673	2.58054	2.4286	01,01,7006	1.38249	2.1528
ENSG00000106367,14	AP1S1	protein_coding	229.868	247.497	293.697	243.46	268.443	323.607	392.224	536.034	410.665
ENSG00000134504,13	KCTD1	protein_coding	15.7269	12.8661	13.7994	22.3035	22.6695	19.7411	21.1841	18.8811	23.1588
ENSG00000149798,4	CDC42EP2	protein_coding	0.564218	0.991632	0.454483	0.508455	0.315524	0.692071	0	0	0
ENSG00000135048,13	CEMIP2	protein_coding	74.5107	70.7819	64.1067	89.4853	78.856	73.5221	103.199	96.0633	94.9651
ENSG00000119333,11	WDR34	protein_coding	160.577	159.572	155.931	176.622	175.804	203.339	202.632	199.103	218.769
ENSG00000136531,15	SCN2A	protein_coding	1.73141	2.55511	1.48481	2.73022	2.51867	2.53021	3.81535	2.93916	3.68241
ENSG00000064999,14	ANKS1A	protein_coding	14.2446	14.1471	11.4156	5.55159	5.63603	6.01637	9.32863	6.83006	8.82217
ENSG00000167371,19	PRRT2	protein_coding	12.8151	11.3613	13.5852	7.76395	8.51002	7.52245	8.04257	6.30394	07,03,2020
ENSG00000122507,20	BBS9	protein_coding	10.9422	9.82321	9.11434	4.01635	5.82604	3.56301	4.35325	4.49856	5.88079
ENSG00000171189,17	GRIK1	protein_coding	3.5703	4.28085	2.27667	1.89631	2.13654	1.52701	1.35687	0.603576	1.31998
ENSG00000228526,7	MIR34AHG	lincRNA	4.65594	4.24635	5.47657	6.44832	5.91868	6.53985	7.43718	7.49847	8.32479
ENSG00000107262,21	BAG1	protein_coding	21.9392	24.4236	25.9225	31.4303	33.4671	38.2576	36.2441	42.2728	38.7941
ENSG00000165030,3	NFIL3	protein_coding	13.3382	12.5703	14.4177	8.26516	8.05795	7.4046	7.44981	5.28244	8.8746
ENSG00000158270,11	COLEC12	protein_coding	0.96159	0.393041	1.11581	0.453658	0.419212	0.626595	0.173127	0.171476	0.138211
ENSG00000126246,9	IGFLR1	protein_coding	4.78553	4.56235	7.69078	8.44185	8.29421	9.50465	15.9691	15.2014	11.1352
ENSG00000150471,16	ADGRL3	protein_coding	15.3339	14.1755	9.09283	6.40078	4.72435	5.73421	7.37015	4.96605	7.24807
ENSG00000137877,9	SPTBN5	protein_coding	2.32302	1.71481	1.99909	1.03499	0.860747	1.23162	0.66464	1.03154	0.930315
ENSG00000140400,16	MAN2C1	protein_coding	99.0206	101.772	98.3102	83.2248	77.5371	88.6341	67.6791	63.6036	75.0936
ENSG00000182771,18	GRID1	protein_coding	12.1664	13.4201	11.733	4.78622	4.75057	5.37146	8.60199	6.21847	7.65621
ENSG00000198682,12	PAPSS2	protein_coding	8.10169	8.42789	6.47226	5.63725	5.24174	4.28151	4.55124	3.6282	4.30098
ENSG00000167676,4	PLIN4	protein_coding	0.040384	0.055857	0.074227	0.230036	0.332123	0.260528	0.53217	0.190075	0.528801
ENSG00000182389,19	CACNB4	protein_coding	8.08899	8.98887	5.13794	2.51637	3.63467	2.99661	3.93611	2.28321	3.83559
ENSG00000100095,18	SEZ6L	protein_coding	4.74046	3.40449	2.33885	2.05703	3.15086	1.89257	1.48158	0.819337	1.53879
ENSG00000128274,16	A4GALT	protein_coding	12.9546	15.323	12.4422	14.9602	12.0099	16.0864	22.629	18.6903	22.834
ENSG00000134775,15	FHOD3	protein_coding	11.4925	12.3701	10.6351	6.51712	7.41023	7.65283	8.15162	5.26315	6.70174
ENSG00000117360,12	PRPF3	protein_coding	47.4366	51.6952	53.6813	48.0291	45.9236	44.9665	35.4822	29.998	35.8581
ENSG00000112280,16	COL9A1	protein_coding	27.0944	23.6268	27.8666	13.9682	14.9542	19.9915	12.7753	15.7291	12.1857
ENSG00000278662,4	GOLGA6L10	protein_coding	2.03104	2.11478	1.52943	0.927894	0.930112	1.01482	0.659024	0.602475	0.887993
ENSG00000178184,15	PARD6G	protein_coding	13.0743	10.5955	12.2311	13.9598	12.3036	14.9542	15.8484	18.5259	23.6024
ENSG00000139971,15	ARMH4	protein_coding	14.1824	21.1155	9.90612	9.65555	7.56519	10.0968	8.37253	4.86792	4.70871
ENSG00000131669,9	NINJ1	protein_coding	54.5029	55.9276	79.9829	65.9957	75.0062	74.0572	109.439	110.264	100.583
ENSG00000181652,19	ATG9B	protein_coding	2.70714	6.42628	3.39796	0.816391	0.448937	0.410233	1.17193	0.765676	1.38898
ENSG00000034510,5	TMSB10	protein_coding	3073.76	3678.21	5088.83	4106.91	4605.38	5044.65	6323.16	10156.9	6832.84
ENSG00000157150,4	TIMP4	protein_coding	25.5238	26.2475	20.5666	32.1038	35.8392	43.4044	40.6891	31.4297	37.7826
ENSG00000197019,4	SERTAD1	protein_coding	2.87514	2.23397	3.45893	3.5942	4.45688	6.61859	7.68038	6.54103	5.8591
ENSG00000181790,11	ADGRB1	protein_coding	37.4736	31.4125	39.1996	19.4899	21.4528	22.7974	22.9032	15.8505	25.8945
ENSG00000213523,10	SRA1	protein_coding	35.102	30.4288	43.0459	48.7978	42.9468	49.5359	56.8801	73.1468	58.3038
ENSG00000005884,17	ITGA3	protein_coding	24.3553	17.3714	14.7541	27.8019	31.1997	38.1914	30.592	26.6451	34.981
ENSG00000109113,19	RAB34	protein_coding	161.067	172.063	203.302	218.985	239.448	287.58	266.049	329.795	274.423
ENSG00000185345,20	PRKN	protein_coding	0.839324	6.79793	1.12489	0.155112	1.509	2.62318	0	0.073492	0.233186
ENSG00000103222,18	ABCC1	protein_coding	8.56629	8.58316	7.12364	3.84801	3.94387	4.5496	5.07964	4.18863	5.74256
ENSG00000113083,13	LOX	protein_coding	4.12617	4.92951	2.79843	1.43996	0.98639	0.820705	1.41359	0.928282	1.95623
ENSG00000078053,16	AMPH	protein_coding	32.0161	33.3051	27.2916	26.3844	29.2653	26.7675	22.1387	17.761	20.4352
ENSG00000260293,2	AC106820,4	sense_intronic	1.23926	1.16401	0.706605	1.51209	1.37283	1.14478	2.48854	1.55222	2.95262
ENSG00000160691,18	SHC1	protein_coding	56.2944	51.0413	46.3672	52.9564	50.0948	55.1936	68.5999	63.7645	68.4572
ENSG00000104059,4	FAM189A1	protein_coding	7.11326	6.22493	5.11904	2.41092	2.5621	3.39926	2.16234	1.96368	3.99523
ENSG00000184005,10	ST6GALNAC3	protein_coding	0.578087	0.8425	1.38533	0.242843	0.278816	0.744294	0.196585	0.098758	0.244151
ENSG00000132205,10	EMILIN2	protein_coding	56.9148	59.4215	54.8177	43.7148	47.1441	47.3329	40.1358	37.9884	45.389
ENSG00000131051,22	RBM39	protein_coding	231.049	208.564	214.39	193.391	197.933	203.395	162.163	148.511	155.28
ENSG00000184056,14	VPS33B	protein_coding	5.11959	6.21013	5.99837	7.34563	5.75434	7.06786	10.1626	8.14441	12.537
ENSG00000123095,5	BHLHE41	protein_coding	23.6312	27.8939	23.1519	14.6959	12.2924	8.47453	11.1998	10.7065	15.7811
ENSG00000151131,10	C12orf45	protein_coding	9.71039	7.89168	15.0116	12.8727	11.603	14.7075	17.585	28.0851	22.5586
ENSG00000259075,6	POC1B-GALNT4	protein_coding	0.98154	2.7758	1.28609	1.47837	1.79292	01,01,3424	0.181797	0.560974	0.438418
ENSG00000154822,17	PLCL2	protein_coding	4.91871	4.04334	3.69855	5.91794	7.15838	6.64121	7.20176	5.38162	7.52564
ENSG00000187391,20	MAGI2	protein_coding	52.7233	43.2605	27.5909	19.7192	22.5561	19.4277	23.7926	12.7137	23.5765
ENSG00000144642,21	RBMS3	protein_coding	9.21114	9.98628	6.77069	2.64598	2.96187	2.84062	5.27574	2.25718	4.42479
ENSG00000197283,16	SYNGAP1	protein_coding	41.6855	36.6764	37.7766	18.8145	38.3631	38.6332	16.1615	15.2449	23.6766
ENSG00000162433,14	AK4	protein_coding	38.315	32.7866	34.457	17.1828	15.3557	14.8688	26.2666	17.5049	22.1613
ENSG00000237515,8	SHISA9	protein_coding	26.7328	25.1455	20.1259	13.6375	13.4952	13.3057	16.316	9.8176	16.2026
ENSG00000196696,12	PDXDC2P-NPIPB14P	processed_transcript	15.0712	15.4452	15.5258	9.91041	11.6273	10.3993	8.55657	9.91872	8.33709
ENSG00000005513,9	SOX8	protein_coding	42.2151	40.6687	42.9049	30.9177	32.5378	36.0882	29.0353	27.5484	30.012
ENSG00000100949,14	RABGGTA	protein_coding	10.3141	11.0286	12.9362	15.5712	13.6975	17.3289	19.3326	19.0495	17.9033
ENSG00000126088,13	UROD	protein_coding	63.7337	57.7125	67.0297	74.4167	73.1095	72.3672	82.2232	100.074	97.4959
ENSG00000175040,5	CHST2	protein_coding	23.9871	22.2575	18.7501	23.1207	23.2502	27.3851	29.1168	27.0143	31.856
ENSG00000141519,14	CCDC40	protein_coding	10.4299	12.5862	11.4702	10.0141	11.9622	9.51414	6.7741	4.59288	6.61177
ENSG00000134138,19	MEIS2	protein_coding	17.8904	12.9932	13.939	10.7941	10.7956	12.5414	8.38381	6.34838	10.3169
ENSG00000026652,13	AGPAT4	protein_coding	23.0875	23.4064	18.2139	17.007	16.433	14.7213	12.2232	11.0586	16.4401
ENSG00000089486,16	CDIP1	protein_coding	22.4855	22.8338	28.5329	24.6139	25.6698	28.3781	36.2445	45.0266	37.986
ENSG00000130517,13	PGPEP1	protein_coding	12.8503	14.6652	10.696	21.9233	18.688	21.2885	19.8757	15.2506	20.345
ENSG00000149547,14	EI24	protein_coding	110.199	98.5259	91.9462	130.15	120.638	130.689	130.007	112.583	146.496
ENSG00000132535,19	DLG4	protein_coding	53.4852	55.7676	59.818	40.8853	44.7778	42.9828	41.1578	31.9739	41.0245
ENSG00000167766,18	ZNF83	protein_coding	67.8199	62.6517	60.8094	51.3701	51.5319	51.0526	48.2556	40.5251	41.594
ENSG00000134256,12	CD101	protein_coding	0.121258	0.41035	0.382412	3.04291	1.6278	0.521021	1.98301	1.08482	3.63373
ENSG00000143375,14	CGN	protein_coding	4.7903	6.14102	5.35042	4.528	2.28143	2.4928	2.33402	2.39412	2.05289
ENSG00000008710,19	PKD1	protein_coding	60.8634	72.1362	61.3051	43.664	47.2817	52.8177	43.9222	42.0645	40.0274
ENSG00000120756,12	PLS1	protein_coding	4.10083	3.73036	2.71094	2.88035	2.70696	4.74981	1.06358	1.20989	1.78198
ENSG00000103365,15	GGA2	protein_coding	49.3841	42.8193	38.2721	41.6178	35.4856	37.7715	29.276	23.5141	32.0515
ENSG00000196569,12	LAMA2	protein_coding	4.45778	5.18188	3.53681	3.36388	3.37173	2.9922	2.99615	1.72702	1.77742
ENSG00000169045,17	HNRNPH1	protein_coding	809.991	813.442	709.398	699.128	796.842	837.133	595.518	449.488	578.524
ENSG00000133424,20	LARGE1	protein_coding	9.50901	8.93468	6.20326	3.7424	3.62637	5.00377	4.50087	2.81942	4.97439
ENSG00000276550,4	HERC2P2	transcribed_unprocessed_pseudogene	53.3743	53.8294	55.3191	54.6075	52.6114	53.9558	41.6036	32.7809	41.7949
ENSG00000225151,10	GOLGA2P7	transcribed_unprocessed_pseudogene	33.0952	33.308	27.756	26.1733	27.4753	34.5377	19.2189	15.1913	23.4523
ENSG00000163945,16	UVSSA	protein_coding	16.7868	17.5236	11.5681	14.9285	12.9941	14.6143	10.0504	8.2236	8.57647
ENSG00000255248,8	MIR100HG	processed_transcript	75.8133	75.2024	74.0317	56.2229	57.7297	55.2065	58.1122	45.1515	56.7883
ENSG00000213719,8	CLIC1	protein_coding	426.042	445.769	490.2	493.406	536.987	564.361	613.725	660.163	618.71
ENSG00000165443,11	PHYHIPL	protein_coding	25.6141	29.4603	30.0282	19.723	19.2301	18.6177	20.1521	16.4357	17.3447
ENSG00000002016,17	RAD52	protein_coding	19.7392	18.2073	19.6722	19.5343	15.2389	14.4454	11.8985	9.75087	8.27006
ENSG00000182013,17	PNMA8A	protein_coding	46.9721	45.8314	44.3919	50.0679	49.7261	53.4008	59.9818	53.0314	57.8065
ENSG00000185985,9	SLITRK2	protein_coding	7.56825	7.34212	6.98025	7.50512	7.04976	7.43562	5.47233	4.25565	4.96689
ENSG00000182621,17	PLCB1	protein_coding	29.3714	17.8252	11.5193	10.0234	7.36813	8.13689	8.45813	7.34387	10.2087
ENSG00000206538,8	VGLL3	protein_coding	9.69649	01,12,8376	6.23578	9.32024	7.49175	6.98156	5.59651	2.90755	4.80736
ENSG00000275620,1	FLJ16779	antisense	0.6845	0.661854	0.498579	0.231061	0.224632	0.114903	0.163423	0.17687	0.179982
ENSG00000008256,15	CYTH3	protein_coding	27.3105	34.1583	24.726	18.1531	16.9158	23.5992	18.2943	14.2225	18.8787
ENSG00000145979,17	TBC1D7	protein_coding	31.6203	38.5032	40.6884	42.1674	41.4753	42.5154	53.7957	78.94	58.9664
ENSG00000078549,14	ADCYAP1R1	protein_coding	11.966	11.1935	7.39733	5.41494	4.99661	6.03728	5.43582	3.8957	6.82547
ENSG00000187630,16	DHRS4L2	protein_coding	10.4184	12.54	14.0684	15.4339	18.3351	16.0532	21.3446	28.512	20.0564
ENSG00000163818,16	LZTFL1	protein_coding	14.1154	12.3275	11.9607	9.93873	11.816	15.3308	8.03689	4.46945	7.49207
ENSG00000061938,17	TNK2	protein_coding	63.5725	70.7137	42.7204	33.0399	33.8151	46.3028	30.7735	28.5804	38.5764
ENSG00000183775,10	KCTD16	protein_coding	0.696921	0.630272	0.454554	0.268795	0.091491	0.046581	0.112817	0.113479	0.097192
ENSG00000160200,17	CBS	protein_coding	191.708	199.494	184.375	143.118	162.648	192.042	138.662	118.395	119.99
ENSG00000258441,1	LINC00641	processed_transcript	10.6559	11.3711	8.58447	9.77751	9.47136	9.19869	6.58586	5.35029	7.02489
ENSG00000146733,13	PSPH	protein_coding	127.009	112.27	128.699	206.157	205.897	220.282	156.578	144.815	187.606
ENSG00000198826,10	ARHGAP11A	protein_coding	73.81	73.6011	56.7618	84.098	75.0607	64.4372	45.5779	31.3303	46.646
ENSG00000254692,1	AL136295,1	protein_coding	0	0	0	1.68254	0	0.613094	1.33588	3.7677	1.48858
ENSG00000006210,6	CX3CL1	protein_coding	19.4183	19.5124	20.7874	27.3697	28.464	32.6738	27.2926	24.2662	28.5949
ENSG00000171988,18	JMJD1C	protein_coding	64.3554	70.0883	52.0505	53.3875	50.4271	41.3676	41.8813	33.7687	41.5086
ENSG00000183696,13	UPP1	protein_coding	8.81811	9.34953	12.771	18.6376	17.835	17.1581	17.4625	22.4831	18.1127
ENSG00000121964,14	GTDC1	protein_coding	14.9243	12.8949	13.7946	9.46478	7.74938	7.79667	9.23736	5.4465	8.23553
ENSG00000105835,11	NAMPT	protein_coding	51.1666	58.3815	48.6581	46.7813	44.068	45.685	39.7599	22.2769	33.0676
ENSG00000134376,15	CRB1	protein_coding	4.34072	5.10631	3.15823	1.11986	1.16516	0.631494	1.78327	1.80158	1.51366
ENSG00000013573,16	DDX11	protein_coding	110.268	97.1989	78.8821	77.2753	78.8442	97.3385	61.5027	57.9019	62.6861
ENSG00000049323,15	LTBP1	protein_coding	2.35233	2.34568	2.07241	2.21222	2.11158	1.40559	1.31789	0.463894	0.592371
ENSG00000115107,19	STEAP3	protein_coding	1.30685	2.01379	1.1178	2.36809	2.96228	2.65904	3.64963	2.61787	2.77034
ENSG00000105290,11	APLP1	protein_coding	40.2184	42.2228	51.5774	28.6436	39.6956	30.263	70.9856	71.5972	69.3246
ENSG00000174775,16	HRAS	protein_coding	92.4421	97.9584	109.313	105.078	111.735	149.38	142.16	189.557	158.635
ENSG00000118922,17	KLF12	protein_coding	15.6769	14.5918	9.07716	8.29076	9.12226	8.30108	8.5152	4.90362	7.62157
ENSG00000163660,11	CCNL1	protein_coding	61.1609	64.7069	58.5521	45.8712	49.3498	42.9074	46.2142	34.5494	33.2349
ENSG00000173068,17	BNC2	protein_coding	0.009811	0.027127	0.009013	0	0.020042	0.008443	0.199553	0.559386	0.184199
ENSG00000006118,14	TMEM132A	protein_coding	84.6325	86.0897	78.8647	53.2933	55.2779	66.9986	55.9794	55.95	55.6474
ENSG00000128159,11	TUBGCP6	protein_coding	24.1458	22.6524	21.6071	17.9214	20.4725	19.4583	16.4202	14.7113	16.9987
ENSG00000077458,12	FAM76B	protein_coding	25.6008	23.1736	29.194	28.2966	27.0466	33.5238	17.214	14.507	16.422
ENSG00000178445,9	GLDC	protein_coding	28.0647	28.9227	29.0789	30.6044	38.3322	34.9571	36.4266	38.0688	44.6457
ENSG00000100941,8	PNN	protein_coding	104.068	112.693	109.231	94.2796	95.4193	93.5731	80.6312	70.7734	87.4745
ENSG00000247596,8	TWF2	protein_coding	55.1298	58.7412	57.7841	57.9572	65.907	72.7746	76.7565	89.1658	80.4808
ENSG00000100647,7	SUSD6	protein_coding	7.27491	8.17066	6.07596	11.3173	10.3111	13.1746	11.6907	8.91566	10.9242
ENSG00000100890,15	KIAA0391	protein_coding	26.9291	25.3176	22.0015	27.6492	27.5031	26.5214	31.3223	32.8891	36.2238
ENSG00000061337,15	LZTS1	protein_coding	18.317	17.1944	14.8886	28.1191	28.1535	31.9633	27.3898	18.0024	25.8316
ENSG00000135736,5	CCDC102A	protein_coding	8.38804	12.255	9.2492	12.5551	14.5044	16.2066	18.7953	12.3961	19.3184
ENSG00000112379,8	ARFGEF3	protein_coding	1.42813	1.5498	0.745206	0.640512	0.801854	0.712727	0.642594	0.313625	0.585268
ENSG00000142494,13	SLC47A1	protein_coding	2.0021	2.06367	2.27918	4.11541	3.29006	6.46938	4.90306	3.41739	5.59112
ENSG00000259820,1	AC083843,2	lincRNA	2.27847	1.85492	1.55632	1.2527	1.2431	1.18296	0.757388	0.821174	1.1384
ENSG00000244649,4	LINC02086	lincRNA	0	0.094152	0.231194	0.921382	0.905574	0.545403	1.48297	0.802914	1.54076
ENSG00000225697,12	SLC26A6	protein_coding	36.4973	30.9698	43.6253	25.0441	24.4762	22.6068	21.1367	21.1242	24.6461
ENSG00000212907,2	MT-ND4L	protein_coding	4311.5	4014.11	7272.07	3562.23	3675.91	3432.84	3203.52	2437.53	2418.05
ENSG00000139292,12	LGR5	protein_coding	12.0325	16.7449	10.9801	6.39893	7.79977	7.51722	7.40794	7.47615	7.94917
ENSG00000006282,20	SPATA20	protein_coding	11.7219	14.0178	14.3914	10.6759	13.3192	15.3684	19.4811	22.4272	21.5105
ENSG00000112699,10	GMDS	protein_coding	4.28376	6.61026	6.08268	2.95237	01,03,1949	5.1924	2.2225	1.68381	2.38239
ENSG00000104783,12	KCNN4	protein_coding	4.60672	4.67002	4.85257	5.43501	5.64307	6.88733	7.43905	9.3519	8.40838
ENSG00000011021,22	CLCN6	protein_coding	17.2773	20.8749	14.5648	12.5065	12.649	14.2798	12.3778	01,07,9927	11.2572
ENSG00000138131,3	LOXL4	protein_coding	0.649172	0.931822	0.829104	1.25929	1.02553	1.45696	2.36317	1.37675	2.00258
ENSG00000042445,13	RETSAT	protein_coding	26.6541	21.3401	21.537	31.2736	31.5159	30.6447	31.3823	28.0284	32.961
ENSG00000159348,12	CYB5R1	protein_coding	5.851	6.01148	6.50518	6.47085	7.45606	9.28976	11.9177	11.2375	9.65003
ENSG00000158805,11	ZNF276	protein_coding	21.3825	26.9242	20.6359	18.2144	22.604	20.2662	13.719	14.3976	12.5041
ENSG00000102804,14	TSC22D1	protein_coding	133.221	121.58	136.353	142.636	149.236	152.548	165.936	182.028	174.32
ENSG00000111846,17	GCNT2	protein_coding	5.14358	5.01642	4.06322	5.68073	5.99766	5.6725	8.25599	5.85947	7.21263
ENSG00000276023,4	DUSP14	protein_coding	18.0675	15.8824	23.3237	29.8247	27.518	28.9273	28.6677	31.31	31.8545
ENSG00000197774,12	EME2	protein_coding	17.3346	14.3762	10.762	11.929	12.8554	8.48672	8.52437	6.45968	7.64156
ENSG00000065802,11	ASB1	protein_coding	12.4492	14.882	14.0276	16.7673	17.0011	22.8099	22.0852	35.1274	19.2593
ENSG00000162783,10	IER5	protein_coding	45.8083	44.0743	44.4684	46.8566	49.6063	57.813	60.5611	68.1371	58.8409
ENSG00000279744,1	AC132938,5	TEC	1.98306	2.63152	2.22424	0.765057	1.16458	0.665445	0.454858	0.704981	0.46729
ENSG00000075213,10	SEMA3A	protein_coding	45.2299	41.407	31.5955	30.5637	27.1045	32.5047	25.8071	13.7452	26.7467
ENSG00000185736,15	ADARB2	protein_coding	4.42118	4.99839	2.51563	1.53306	1.65928	0.94544	1.64388	1.37585	2.05844
ENSG00000178078,11	STAP2	protein_coding	0.787333	0.949349	1.38673	2.45506	1.65704	1.49839	2.95901	3.92342	3.4324
ENSG00000038382,19	TRIO	protein_coding	360.36	378.595	243.906	290.474	274.519	273.118	224.226	137.171	219.389
ENSG00000141753,6	IGFBP4	protein_coding	39.2552	44.6984	49.5694	40.7684	40.1452	46.5791	59.1983	71.193	66.5667
ENSG00000054148,17	PHPT1	protein_coding	166.027	145.42	251.046	160.87	192.332	200.247	319.537	385.751	288.278
ENSG00000132646,10	PCNA	protein_coding	288.432	288.308	397.052	411.06	424.062	438.598	479.157	652.906	467.972
ENSG00000188643,10	S100A16	protein_coding	181.246	171.755	260.122	223.561	240.167	257.871	308.911	335.878	315.822
ENSG00000177076,5	ACER2	protein_coding	0.367993	0.509942	0.33872	2.1344	1.7005	1.94826	1.20141	1.22125	1.37441
ENSG00000118564,14	FBXL5	protein_coding	52.4315	55.4746	48.6386	76.5737	66.5396	73.7653	68.6411	62.7725	69.7009
ENSG00000089159,16	PXN	protein_coding	51.0721	56.4564	50.5063	53.7164	50.2916	61.9337	71.301	62.4772	70.0495
ENSG00000145431,10	PDGFC	protein_coding	36.9839	34.6312	25.1046	33.5203	35.6693	40.5572	48.5472	40.7182	47.1939
ENSG00000117153,15	KLHL12	protein_coding	18.6403	18.1112	19.5366	24.4528	24.9973	26.7697	29.3028	23.2479	24.192
ENSG00000138764,14	CCNG2	protein_coding	41.6684	43.2263	37.3569	29.2738	29.9233	33.5229	29.7981	26.6159	28.8587
ENSG00000255526,6	NEDD8-MDP1	protein_coding	3.77327	2.69248	2.7035	5.76943	4.96514	5.11765	11.2078	10.8305	6.03885
ENSG00000239213,5	NCK1-DT	antisense	11.0691	10.1092	9.55699	10.2958	11.7611	8.51673	19.4024	14.4269	18.613
ENSG00000284946,1	AC068831,7	protein_coding	7.99579	6.36686	7.68438	5.7426	5.68129	4.83088	4.87334	3.88881	5.05764
ENSG00000282458,1	WASH5P	transcribed_processed_pseudogene	45.777	41.642	29.7914	36.3352	32.5078	31.5226	26.9433	14.0541	23.7373
ENSG00000101871,14	MID1	protein_coding	4.37136	5.21356	3.37601	3.15774	2.15122	2.48143	2.32578	0.97339	2.42362
ENSG00000141750,6	STAC2	protein_coding	9.69326	10.0369	9.6576	6.71633	8.34297	8.60131	6.85573	5.43621	5.86645
ENSG00000010165,19	METTL13	protein_coding	21.991	22.7187	25.2318	28.5879	31.1542	36.3928	30.2528	32.5013	36.3724
ENSG00000170835,14	CEL	protein_coding	1.48714	1.42642	1.94765	2.45476	2.35682	2.67888	3.02455	3.66543	3.56573
ENSG00000078269,14	SYNJ2	protein_coding	4.67544	4.99743	3.71331	7.13703	6.76726	6.38352	6.47679	5.43005	7.50648
ENSG00000154359,12	LONRF1	protein_coding	13.0529	14.5279	14.2486	23.7205	21.5939	28.585	19.113	17.6155	23.8485
ENSG00000188185,11	LINC00265	lincRNA	6.58444	8.06167	6.85547	5.50348	5.22884	5.52136	4.52009	2.65775	4.42367
ENSG00000001461,16	NIPAL3	protein_coding	5.11115	5.29018	3.62895	4.76257	4.33191	4.68896	9.97461	5.16673	9.60173
ENSG00000160075,11	SSU72	protein_coding	116.189	122.923	126.21	124.358	129.568	123.708	149.199	152.189	167.94
ENSG00000005206,16	SPPL2B	protein_coding	56.5333	64.197	58.1294	37.9162	46.2218	49.9875	40.3254	37.6409	42.0458
ENSG00000083857,13	FAT1	protein_coding	82.7325	82.042	69.9194	108.144	93.9068	88.785	100.957	92.1193	115.176
ENSG00000203760,8	CENPW	protein_coding	11.3488	17.4552	27.1579	28.1758	28.3388	30.0879	37.539	52.2312	35.3575
ENSG00000079819,18	EPB41L2	protein_coding	89.9467	81.1776	72.9889	65.9003	53.126	49.5025	57.9222	33.8097	54.3505
ENSG00000250251,6	PKD1P6	transcribed_unprocessed_pseudogene	21.2755	22.6162	14.579	21.0134	14.6575	17.6732	12.0728	6.7231	10.8839
ENSG00000111664,10	GNB3	protein_coding	7.75079	7.6501	9.04925	6.73084	6.27795	6.94838	3.66636	4.66472	2.57094
ENSG00000184702,19	SEPT5	protein_coding	50.3911	62.2722	51.4192	67.8387	52.1427	58.3355	80.9595	64.9779	86.976
ENSG00000187243,16	MAGED4B	protein_coding	142.529	140.462	108.766	116.61	145.433	137.16	169.175	171.585	189.215
ENSG00000072274,12	TFRC	protein_coding	63.6084	57.6901	48.3755	28.9054	26.6341	32.1883	41.966	34.6456	39.5422
ENSG00000159399,9	HK2	protein_coding	50.3601	49.696	36.5011	25.0313	27.5123	26.7747	30.8104	19.2639	33.538
ENSG00000026036,22	RTEL1-TNFRSF6B	protein_coding	5.05434	5.67722	6.21738	4.92337	4.72566	5.40771	3.82468	2.68131	3.87952
ENSG00000285437,1	POLR2J3	protein_coding	60.511	55.5152	101.63	40.4707	29.8827	37.9861	42.3225	16.5024	37.5237
ENSG00000079435,9	LIPE	protein_coding	6.67831	8.64639	9.73315	9.97657	6.92146	8.01084	4.57964	3.99487	3.36533
ENSG00000013016,15	EHD3	protein_coding	7.12219	6.12995	5.774	4.08005	3.60738	4.17109	3.99103	2.50534	4.4735
ENSG00000120875,8	DUSP4	protein_coding	23.6701	22.3817	15.4049	29.523	27.4328	27.1533	33.5781	22.3509	43.2388
ENSG00000233901,5	LINC01503	lincRNA	3.07038	4.87646	5.23321	2.95605	4.71806	4.11283	10.0006	11.4269	11.1546
ENSG00000072182,12	ASIC4	protein_coding	6.13733	4.7206	4.6685	1.76079	1.98473	1.50942	2.85092	2.4018	2.29112
ENSG00000165912,15	PACSIN3	protein_coding	15.8926	15.2788	13.2555	17.4033	16.4499	19.8581	20.1912	22.0078	21.6642
ENSG00000143847,15	PPFIA4	protein_coding	31.3392	21.8953	21.4249	8.46279	7.28765	5.84285	13.0372	13.6427	6.87725
ENSG00000163453,11	IGFBP7	protein_coding	10.2484	8.91646	12.1407	10.3117	9.65847	11.0655	19.0043	18.7008	15.1749
ENSG00000113578,17	FGF1	protein_coding	2.00313	1.96762	2.06985	2.49168	3.8844	2.82032	5.11843	3.80644	3.03601
ENSG00000276043,4	UHRF1	protein_coding	183.002	170.06	145.045	148.729	151.101	174.692	125.097	95.9743	128.885
ENSG00000006283,17	CACNA1G	protein_coding	2.41439	1.45968	1.39977	1.43793	1.16598	1.38244	0.930356	0.466844	0.883384
ENSG00000186994,11	KANK3	protein_coding	1.5714	1.5104	2.93099	1.83389	3.62901	7.16505	6.77659	6.35456	5.39991
ENSG00000138166,5	DUSP5	protein_coding	6.30301	5.625	6.38461	8.62572	7.65673	8.09741	9.49645	7.63794	10.5937
ENSG00000176014,12	TUBB6	protein_coding	96.9756	104.591	116.65	122.792	118.342	139.877	146.817	149.601	140.707
ENSG00000164543,6	STK17A	protein_coding	190.286	190.802	172.395	174.872	183.183	194.698	220.873	209.257	235.06
ENSG00000176410,7	DNAJC30	protein_coding	15.5749	16.1506	16.5953	17.3085	18.2575	16.4263	20.1318	25.559	24.7333
ENSG00000204304,11	PBX2	protein_coding	69.7385	63.0587	66.7567	56.9914	57.8057	57.3123	48.7394	33.5016	52.8693
ENSG00000171004,18	HS6ST2	protein_coding	4.99987	4.54621	4.7428	4.02653	4.25047	3.81701	3.20509	2.61638	2.26114
ENSG00000224877,3	NDUFAF8	protein_coding	84.4499	82.8737	106.879	85.3466	100.33	115.456	133.252	238.219	139.645
ENSG00000139433,9	GLTP	protein_coding	33.0065	31.1964	27.9779	30.1691	33.6896	32.1745	43.2998	36.04	39.707
ENSG00000177694,15	NAALADL2	protein_coding	3.56157	2.94697	1.57526	1.73718	1.05978	0.92161	0.256594	0.601903	1.22543
ENSG00000166889,13	PATL1	protein_coding	32.2382	31.6667	34.62	32.8552	35.4261	31.2132	24.9916	18.7146	24.3275
ENSG00000138640,14	FAM13A	protein_coding	16.6412	16.8075	13.5174	9.19202	11.4389	9.42565	11.0526	7.03997	10.623
ENSG00000171219,8	CDC42BPG	protein_coding	0	0	0.030917	0.10946	0.067074	0.019288	0.422181	0.237428	0.19004
ENSG00000152527,13	PLEKHH2	protein_coding	16.7055	17.0855	11.5821	14.2222	12.4696	9.30252	9.19715	7.06602	9.54254
ENSG00000130005,12	GAMT	protein_coding	46.0577	46.1963	50.025	47.3995	45.1418	56.6923	63.8771	75.9437	67.3377
ENSG00000256500,5	AL139300,1	protein_coding	8.77705	01,07,3779	15.941	16.8281	17.2127	26.6641	19.4986	20.718	24.2723
ENSG00000139793,18	MBNL2	protein_coding	14.2	13.2102	9.38366	7.96759	8.69637	5.91095	7.4757	4.12059	7.5803
ENSG00000127955,16	GNAI1	protein_coding	109.077	114.504	107.279	121.48	114.64	119.349	138.799	140.926	138.321
ENSG00000185088,13	RPS27L	protein_coding	276.26	225.296	389.228	274.791	322.941	306.589	510.952	483.971	443.995
ENSG00000124570,19	SERPINB6	protein_coding	93.3084	88.061	112.522	94.6232	105.282	105.657	130.23	176.966	142.148
ENSG00000171222,10	SCAND1	protein_coding	74.5743	83.2557	96.899	82.2013	88.6757	113.637	119.663	196.246	128.412
ENSG00000115687,13	PASK	protein_coding	15.939	19.2595	15.6632	17.2155	13.934	17.7615	11.4947	9.92357	11.5028
ENSG00000164125,15	FAM198B	protein_coding	2.54143	0.92621	0.537472	0.46553	0.61345	0.469291	0.345054	0.272468	0.305849
ENSG00000185053,13	SGCZ	protein_coding	1.3299	0.908368	1.18788	0.09947	0.322358	0.15828	0.0926	0.215939	0.23744
ENSG00000136213,9	CHST12	protein_coding	32.9464	33.1222	30.8608	31.9383	31.5017	37.9935	40.7595	44.6399	43.4591
ENSG00000152495,10	CAMK4	protein_coding	2.96202	3.07813	2.11832	4.34347	2.81453	1.5429	1.40972	0.297377	0.918948
ENSG00000066739,11	ATG2B	protein_coding	10.8082	01,08,2474	6.19414	8.36485	6.66146	8.51179	5.47821	4.1656	4.9055
ENSG00000256124,5	LINC01152	lincRNA	8.67628	9.60398	7.31195	8.46421	7.11538	7.99144	13.5883	12.5583	11.8018
ENSG00000100983,10	GSS	protein_coding	69.6308	66.3627	70.8049	68.8936	64.128	70.6859	88.9989	107.318	91.6179
ENSG00000147119,3	CHST7	protein_coding	22.1938	23.3754	19.4086	16.1737	17.4365	18.5932	27.7176	25.7897	32.6781
ENSG00000182704,7	TSKU	protein_coding	30.9211	30.2423	32.2124	33.8777	35.8684	38.8762	39.77	39.1944	41.1777
ENSG00000183044,11	ABAT	protein_coding	30.2114	33.1788	25.0844	18.2645	20.3803	16.6548	20.6838	11.3318	20.2228
ENSG00000102935,11	ZNF423	protein_coding	2.48904	2.83576	1.93331	4.7758	3.44535	3.46195	5.44353	2.95652	4.91272
ENSG00000112983,17	BRD8	protein_coding	62.1808	51.4594	47.6941	50.3006	60.2761	63.2474	35.9144	32.2471	40.3184
ENSG00000099949,19	LZTR1	protein_coding	34.6009	43.3765	33.8236	32.828	29.822	35.4811	25.6288	19.1665	28.5313
ENSG00000115561,15	CHMP3	protein_coding	108.428	99.1868	93.9413	121.326	123.934	143.394	120.904	117.062	143.364
ENSG00000141232,4	TOB1	protein_coding	42.2791	40.9787	39.1573	53.5032	48.86	49.1948	51.7233	49.0005	53.8728
ENSG00000146067,15	FAM193B	protein_coding	50.9552	44.5613	45.1224	39.0492	35.426	37.3712	32.9068	30.6393	35.301
ENSG00000169710,8	FASN	protein_coding	146.939	137.129	104.043	108.114	115.121	123.143	87.3522	79.1347	99.7296
ENSG00000152578,12	GRIA4	protein_coding	3.46225	2.22044	3.45115	1.92883	1.87532	2.69325	1.74126	0.973059	1.33783
ENSG00000198899,2	MT-ATP6	protein_coding	3407.41	2620.23	7366.9	2394.88	2739.66	1975.1	2362.74	1545.61	2040.99
ENSG00000172831,11	CES2	protein_coding	24.7756	18.8902	17.7154	23.9128	24.2918	27.8752	30.8736	22.5261	35.0943
ENSG00000138073,13	PREB	protein_coding	32.7782	31.4858	31.0291	35.9419	36.8879	43.1131	37.8659	41.8517	48.4592
ENSG00000115414,18	FN1	protein_coding	80.8402	89.8264	93.8788	59.6426	61.9368	56.8092	51.8385	62.2433	59.1136
ENSG00000111859,16	NEDD9	protein_coding	12.8004	12.5182	9.69495	18.587	16.6873	19.1739	17.4286	12.9252	17.9177
ENSG00000092841,18	MYL6	protein_coding	1005.24	1070.54	1444.2	1194.87	1394.54	1478.65	1633.36	2284.3	1740.37
ENSG00000214279,13	SCART1	protein_coding	2.62379	1.58539	1.30441	0.756054	1.07498	1.03517	0.609974	0.77902	0.498461
ENSG00000197324,8	LRP10	protein_coding	30.0015	32.0682	26.2993	35.1962	31.2044	43.8603	41.4239	33.7303	48.0625
ENSG00000085741,12	WNT11	protein_coding	6.17296	5.94896	5.17231	2.63176	2.67259	3.28232	2.62983	2.95916	2.76536
ENSG00000101680,14	LAMA1	protein_coding	0.761899	0.349893	0.350953	0.229645	1.04796	0.582578	0.091838	0.120547	0.030309
ENSG00000101846,6	STS	protein_coding	3.61632	3.38886	2.63701	5.11819	4.73136	4.5139	2.29392	1.16793	1.77112
ENSG00000254087,7	LYN	protein_coding	5.22512	4.61098	4.74101	3.92786	4.58495	4.80699	3.21767	1.9533	3.05802
ENSG00000137547,8	MRPL15	protein_coding	68.2214	66.8836	75.3441	77.6591	89.3144	85.7893	90.5401	116.167	99.0498
ENSG00000204267,13	TAP2	protein_coding	22.531	20.6396	17.4771	22.082	19.788	21.0487	12.3529	13.5852	11.4666
ENSG00000116191,17	RALGPS2	protein_coding	1.97775	1.63177	0.880066	0.566869	1.58242	1.26227	0.392851	0.547281	0.44466
ENSG00000254154,8	CRYZL2P-SEC16B	processed_transcript	0.580694	0.416301	0.346991	0	0.161176	0	0	0	0.042218
ENSG00000123064,12	DDX54	protein_coding	42.6933	47.7125	31.0554	46.8132	54.1664	61.2664	56.6897	56.7267	60.4662
ENSG00000180953,11	ST20	protein_coding	6.71689	9.72352	12.9154	11.5758	6.15846	8.26643	20.8687	32.2875	20.2048
ENSG00000185112,5	FAM43A	protein_coding	11.7575	12.9698	11.771	12.258	13.7815	15.1929	17.4687	15.2815	16.9419
ENSG00000178852,15	EFCAB13	protein_coding	2.59149	1.34468	1.40154	1.88772	1.26124	1.21548	0.590254	0.156766	0.492293
ENSG00000244257,5	PKD1P1	unprocessed_pseudogene	8.68543	6.93869	5.78292	6.1339	4.81162	5.75448	5.23943	1.62321	2.55527
ENSG00000164211,12	STARD4	protein_coding	36.4499	39.2259	35.3514	19.8311	19.7876	23.5266	28.3038	23.646	26.6958
ENSG00000163171,7	CDC42EP3	protein_coding	9.05604	9.93214	7.51109	17.0588	16.0611	18.6249	13.0891	9.63216	15.4075
ENSG00000243449,6	C4orf48	protein_coding	127.269	141.71	213.046	115.691	137.254	157.59	245.498	420.503	257.255
ENSG00000221968,8	FADS3	protein_coding	8.83395	9.28235	01,10,3736	7.6113	8.49376	9.03247	13.5248	14.6678	14.783
ENSG00000234476,1	AC092811,1	sense_intronic	0	0.527844	0.524637	1.77946	2.44164	0.721261	3.20538	3.39642	3.55763
ENSG00000129219,13	PLD2	protein_coding	17.3677	19.1405	20.0747	18.0854	14.4708	15.7985	11.4306	10.6637	13.9905
ENSG00000229809,8	ZNF688	protein_coding	16.3786	8.18454	8.25191	16.2732	15.9447	12.465	18.4509	27.3756	18.8621
ENSG00000176485,11	PLA2G16	protein_coding	4.60348	6.68696	5.75211	4.90606	5.25121	01,04,3567	10.8198	10.8293	9.29742
ENSG00000236901,6	MIR600HG	sense_intronic	3.05021	2.67521	01,02,4806	2.45013	2.73005	2.88623	1.91135	1.18943	1.59074
ENSG00000107554,16	DNMBP	protein_coding	27.1648	27.3301	25.0831	37.4937	37.1059	36.1105	36.1136	27.0267	37.3281
ENSG00000135074,15	ADAM19	protein_coding	70.2187	70.644	43.1816	93.5136	91.6222	93.1813	103.18	68.868	103.656
ENSG00000092330,16	TINF2	protein_coding	35.8272	36.2178	44.604	43.893	45.5741	42.5832	50.8883	77.3478	57.92
ENSG00000170579,16	DLGAP1	protein_coding	4.0085	5.2244	3.57383	1.13629	1.97093	1.98043	2.53046	1.53524	2.15383
ENSG00000091136,13	LAMB1	protein_coding	141.347	140.051	107.02	101.68	101.589	121.035	88.6571	76.0059	102.549
ENSG00000120068,6	HOXB8	protein_coding	96.5352	90.6423	103.166	82.3747	91.0337	85.859	126.094	119.557	126.461
ENSG00000277531,2	PNMA8C	protein_coding	2.51631	1.38716	1.26956	2.24426	2.52516	2.16339	3.30479	2.59673	3.57202
ENSG00000277954,1	AC092376,2	antisense	1.08055	1.34874	0.628227	0.645542	0.42797	0.382511	0.311154	0.298778	0.294017
ENSG00000036565,14	SLC18A1	protein_coding	2.87322	1.92577	3.06838	4.23503	3.02866	3.52306	6.04884	5.54216	4.18415
ENSG00000170836,11	PPM1D	protein_coding	18.5621	23.4357	15.0837	32.0839	31.2787	35.9044	29.5048	22.1838	29.6909
ENSG00000176393,10	RNPEP	protein_coding	51.6899	57.8376	70.0288	51.7144	52.4047	55.4227	82.7273	93.0651	82.7914
ENSG00000100417,11	PMM1	protein_coding	28.5065	32.1506	41.9536	37.7473	41.7987	40.2648	51.165	67.61	49.2434
ENSG00000105372,7	RPS19	protein_coding	1586.81	1803.32	2620.85	1759.92	1970.78	2202.25	2920.98	4306.01	3002.63
ENSG00000135926,14	TMBIM1	protein_coding	0.230172	0.106301	0.185352	0.279562	0.215555	0.296467	1.00125	0.97483	0.812927
ENSG00000133110,14	POSTN	protein_coding	2.54664	7.19385	0.327264	0.547817	0.186834	0.547406	0.501342	0.638852	0.288865
ENSG00000155366,16	RHOC	protein_coding	350.943	340.743	405.657	358.547	408.442	447.371	476.054	542.078	497.82
ENSG00000007372,22	PAX6	protein_coding	14.1217	10.7467	11.3302	11.7674	11.8862	10.991	9.10424	5.14487	6.72633
ENSG00000176912,3	TYMSOS	bidirectional_promoter_lncRNA	7.80671	6.5317	10.531	6.27626	6.72618	8.61359	14.0442	27.5243	15.6171
ENSG00000214967,5	NPIPA7	protein_coding	22.891	17.7537	20.4055	14.7225	18.7718	13.8845	11.9889	10.086	9.55037
ENSG00000142327,12	RNPEPL1	protein_coding	24.0092	32.864	27.7665	35.8751	35.87	55.7445	37.1395	47.3257	50.7014
ENSG00000100813,14	ACIN1	protein_coding	190.271	178.596	169.556	177.057	184.608	190.626	134.106	108.332	154.863
ENSG00000205220,11	PSMB10	protein_coding	8.10929	13.9378	12.3858	12.4464	13.3974	16.5802	20.2167	24.179	18.3167
ENSG00000176890,15	TYMS	protein_coding	353.459	353.381	473.161	477.827	504.203	510.305	542.684	602.197	543.65
ENSG00000102359,6	SRPX2	protein_coding	5.49574	5.99971	5.84571	9.82127	10.3187	10.2659	8.45602	6.99342	8.42395
ENSG00000131477,10	RAMP2	protein_coding	16.0278	19.0203	27.0602	17.2744	20.5738	22.1643	30.8815	58.724	37.2981
ENSG00000067445,20	TRO	protein_coding	42.7558	40.8494	44.9828	30.5483	31.322	33.4108	33.8299	27.2767	30.5124
ENSG00000100439,10	ABHD4	protein_coding	15.2423	16.0813	21.2503	24.4597	26.0057	23.102	25.073	25.0787	26.7457
ENSG00000197696,9	NMB	protein_coding	10.5161	11.486	17.6524	14.9275	14.8896	14.4705	22.1037	26.6978	23.0662
ENSG00000160285,14	LSS	protein_coding	185.924	182.958	159.693	133.671	135.009	148.747	131.818	96.2893	146.791
ENSG00000213178,3	RPL22P1	processed_pseudogene	113.035	111.329	214.146	210.384	189.281	225.077	263.841	466.467	210.021
ENSG00000156453,13	PCDH1	protein_coding	12.0168	12.6391	7.99651	9.40822	7.19311	8.13275	6.52253	3.45906	7.27886
ENSG00000285816,1	AP000944,2	protein_coding	2.80825	2.2767	1.76711	3.43279	3.38289	3.21863	3.4322	3.14162	4.61989
ENSG00000117335,19	CD46	protein_coding	60.0477	57.1121	52.7745	44.9459	46.2856	46.9714	46.052	37.5358	40.9503
ENSG00000189171,14	S100A13	protein_coding	130.286	113.081	218.769	134.704	156.999	151.26	231.785	394.057	253.249
ENSG00000064012,21	CASP8	protein_coding	14.7274	15.7214	15.2964	27.6949	22.4319	22.0098	20.9383	19.0858	24.5234
ENSG00000179761,11	PIPOX	protein_coding	11.5986	13.0594	12.955	17.4093	15.7148	16.9458	18.3411	15.8615	17.4833
ENSG00000115816,14	CEBPZ	protein_coding	50.1683	53.8722	48.0539	71.4133	55.4853	68.189	59.1765	73.9497	80.7373
ENSG00000189221,9	MAOA	protein_coding	6.02312	5.05707	5.87668	4.94119	4.12525	5.21743	3.61207	2.90156	3.82355
ENSG00000197599,12	CCDC154	protein_coding	0.672909	1.57312	0.574667	0.589481	0.725407	0.82165	0.079666	0.072769	0.081664
ENSG00000167280,16	ENGASE	protein_coding	11.8592	13.4447	9.97234	8.02732	6.35868	10.7441	6.82727	6.0897	7.40341
ENSG00000106080,10	FKBP14	protein_coding	40.3552	39.9045	30.2721	35.913	32.0161	34.0741	26.9464	23.5399	24.7899
ENSG00000171885,14	AQP4	protein_coding	2.52367	2.07894	1.70033	0.936547	1.0722	0.990346	1.08861	0.648367	1.29574
ENSG00000106853,19	PTGR1	protein_coding	4.90602	6.28306	7.20642	4.43283	7.45444	8.82259	01,11,5397	14.4084	11.5961
ENSG00000162946,22	DISC1	protein_coding	6.75041	7.55893	4.80678	3.16165	3.76065	3.35804	4.03341	2.23895	4.28146
ENSG00000141580,15	WDR45B	protein_coding	104.961	102.004	120.092	78.2438	88.785	83.2003	79.9922	72.8319	73.6833
ENSG00000143333,6	RGS16	protein_coding	0.841259	1.34678	0.670959	1.81685	2.26878	2.69705	1.90131	1.87328	2.98909
ENSG00000268790,5	AC008764,4	protein_coding	26.4461	12.5509	31.6812	22.9167	19.5657	16.0765	11.8973	3.45979	1.4433
ENSG00000101000,5	PROCR	protein_coding	1.20076	0.609135	0.910035	0.96997	1.38326	0.9393	2.97587	2.55499	2.89182
ENSG00000136943,10	CTSV	protein_coding	14.0654	16.3652	22.4742	16.6881	17.9548	19.2561	30.5908	32.826	24.6857
ENSG00000242294,6	STAG3L5P	transcribed_unprocessed_pseudogene	50.0945	47.5128	37.3328	27.0386	29.1279	26.5842	33.1441	16.4885	27.2926
ENSG00000175193,13	PARL	protein_coding	62.1651	65.0816	71.8981	71.6427	69.1882	61.174	86.5302	111.632	93.0603
ENSG00000173110,7	HSPA6	protein_coding	6.03186	5.55078	5.16804	1.35183	2.04791	1.98766	3.33397	2.49852	3.12839
ENSG00000091490,10	SEL1L3	protein_coding	22.3693	22.7506	18.4123	17.9541	13.7651	15.4156	15.7133	10.1266	14.6774
ENSG00000144036,15	EXOC6B	protein_coding	16.5478	10.8285	7.4839	6.03389	7.22679	4.15168	6.61726	3.6302	6.31672
ENSG00000131773,13	KHDRBS3	protein_coding	29.451	21.5024	30.6217	14.3418	17.6969	12.9806	13.1704	16.6228	15.6292
ENSG00000164054,15	SHISA5	protein_coding	91.4164	95.719	97.6508	95.3703	99.61	107.026	116.432	119.867	121.963
ENSG00000179912,20	R3HDM2	protein_coding	37.2078	28.4322	23.0167	23.8842	27.4895	13.5882	18.0467	12.4398	14.7225
ENSG00000102710,19	SUPT20H	protein_coding	48.3338	51.8215	42.0918	39.5906	43.2648	41.8383	34.581	24.7443	38.0108
ENSG00000225511,7	LINC00475	transcribed_unprocessed_pseudogene	0.565499	0	0.238151	0.731972	1.17805	2.23314	3.90963	4.70248	3.35054
ENSG00000163512,13	AZI2	protein_coding	47.2105	52.7991	48.0421	41.3124	45.7683	53.1783	33.5855	28.2162	39.6643
ENSG00000160072,19	ATAD3B	protein_coding	12.921	19.2269	15.2608	11.3754	13.2963	11.3481	10.9761	8.2896	8.43278
ENSG00000121753,12	ADGRB2	protein_coding	43.5294	39.0538	32.6316	30.8054	32.0668	37.0506	49.3325	43.4486	56.9
ENSG00000090932,10	DLL3	protein_coding	42.0033	45.7913	55.1585	16.7569	15.7776	20.8762	23.0474	32.2914	26.7186
ENSG00000197976,11	AKAP17A	protein_coding	35.1791	35.1238	36.2375	27.2285	28.2878	30.848	27.7402	22.5129	27.721
ENSG00000102265,11	TIMP1	protein_coding	78.3516	97.9394	158.202	123.918	108.139	120.137	168.214	255.809	185.882
ENSG00000136231,13	IGF2BP3	protein_coding	90.1519	94.4665	72.7822	79.2247	75.0274	63.708	62.9253	43.2476	63.6287
ENSG00000127124,15	HIVEP3	protein_coding	18.3227	17.0228	21.7842	23.4116	17.3873	22.0862	25.3333	26.4567	30.5565
ENSG00000100201,20	DDX17	protein_coding	209.965	213.086	198.102	194.255	192.548	198.695	174.987	138.875	163.112
ENSG00000147100,10	SLC16A2	protein_coding	13.4734	13.1281	11.3138	10.4666	10.5441	10.048	9.91474	5.54584	8.24523
ENSG00000132300,18	PTCD3	protein_coding	85.2375	80.0651	75.2905	90.2136	66.0827	82.1332	54.6849	51.5279	58.3356
ENSG00000181467,4	RAP2B	protein_coding	5.65087	6.3468	3.59676	9.16553	9.39225	9.35664	9.57635	5.72933	9.33504
ENSG00000120725,12	SIL1	protein_coding	41.5221	33.2775	35.3232	24.0206	28.9654	26.8431	48.8755	62.5225	49.5635
ENSG00000184007,20	PTP4A2	protein_coding	184.665	176.633	139.658	232.776	195.651	201.781	209.839	201.993	243.035
ENSG00000160305,17	DIP2A	protein_coding	46.2677	48.4907	41.2436	37.0314	37.8883	38.5632	36.8997	28.4726	34.9541
ENSG00000104728,15	ARHGEF10	protein_coding	25.9288	23.2508	21.1505	18.7266	18.9532	18.5581	16.3566	11.7824	19.3962
ENSG00000088538,12	DOCK3	protein_coding	3.1343	2.99636	2.05987	1.0517	1.24721	1.29842	1.75906	1.04218	1.72046
ENSG00000106069,22	CHN2	protein_coding	6.16164	4.49084	3.95401	4.19756	4.16045	4.3176	2.70252	1.32302	2.27776
ENSG00000232573,1	RPL3P4	processed_pseudogene	45.2102	37.2675	74.0438	67.6141	44.1618	32.5286	103.065	538.085	148.138
ENSG00000010244,18	ZNF207	protein_coding	174.769	153.652	180.545	166.885	171.197	171.959	132.569	105.088	134.108
ENSG00000141741,11	MIEN1	protein_coding	34.4078	44.7894	57.9352	46.0261	48.4655	56.0533	69.8967	96.3903	67.4332
ENSG00000147145,12	LPAR4	protein_coding	18.2085	13.7239	8.57812	9.55469	7.60801	5.58002	6.49229	3.085	8.10919
ENSG00000224165,5	DNAJC27-AS1	antisense	7.27235	3.66189	3.74888	4.96396	3.12512	5.37486	13.6445	19.2112	7.7416
ENSG00000120075,5	HOXB5	protein_coding	17.8058	17.8989	25.7479	23.1905	24.6068	27.823	29.4951	35.954	30.7903
ENSG00000168300,13	PCMTD1	protein_coding	14.9207	13.3411	10.8157	11.381	13.0335	10.0301	8.71723	7.52553	7.45277
ENSG00000213619,9	NDUFS3	protein_coding	101.756	125.263	148.034	123.008	142.012	157.889	169.561	288.297	181.76
ENSG00000172456,17	FGGY	protein_coding	7.4653	11.7239	10.5278	3.04119	4.18702	5.00864	5.21414	5.07149	4.10155
ENSG00000156510,12	HKDC1	protein_coding	3.33241	2.86848	2.25476	5.49559	3.17481	3.48762	7.01795	5.8228	3.91706
ENSG00000184194,5	GPR173	protein_coding	7.79981	9.10719	7.09975	6.62747	6.4541	7.04016	5.37198	4.57366	5.79417
ENSG00000100906,10	NFKBIA	protein_coding	18.3669	18.4718	18.5772	24.392	26.1653	23.5429	24.9444	24.8346	25.2182
ENSG00000160310,17	PRMT2	protein_coding	239.605	239.509	238.332	240.817	252.81	260.477	291.066	264.25	289.347
ENSG00000173175,14	ADCY5	protein_coding	0.876469	1.20743	0.973976	0.227472	0.208887	1.13509	0.317203	0.164452	0.242089
ENSG00000243646,9	IL10RB	protein_coding	17.2892	20.8299	23.2828	22.9746	33.5222	27.2526	28.3128	30.3002	34.4616
ENSG00000168913,6	ENHO	protein_coding	7.02759	5.85178	9.20369	7.34893	6.04611	8.21875	10.8168	19.5606	14.6124
ENSG00000064989,12	CALCRL	protein_coding	1.83253	2.09116	1.5625	1.83719	2.08399	0.949456	0.736938	0.516407	0.986067
ENSG00000138759,18	FRAS1	protein_coding	1.08929	1.33065	0.710622	0.50463	0.695221	0.711063	0.490356	0.37199	0.651009
ENSG00000109819,8	PPARGC1A	protein_coding	18.9376	19.8221	14.5752	8.28015	8.83097	8.46982	13.6805	8.84252	12.1942
ENSG00000089775,11	ZBTB25	protein_coding	8.33194	8.46866	7.48893	7.43109	6.91212	4.684	5.68384	3.60502	4.89257
ENSG00000118733,16	OLFM3	protein_coding	6.05741	6.3612	6.05507	3.02885	3.41966	3.90743	3.96674	2.78891	4.31147
ENSG00000139636,15	LMBR1L	protein_coding	48.6953	52.2776	49.3914	29.8883	34.0765	36.3806	37.9179	32.0726	33.8076
ENSG00000077942,18	FBLN1	protein_coding	102.714	103.599	122.032	103.005	102.301	120.991	139.058	146.731	149.265
ENSG00000106415,12	GLCCI1	protein_coding	90.0267	68.7021	69.5277	64.0194	57.4534	56.8358	59.2796	41.2061	53.3661
ENSG00000173114,12	LRRN3	protein_coding	16.4828	15.4863	16.1951	11.9489	14.2056	12.7208	11.3518	6.53698	12.071
ENSG00000117305,14	HMGCL	protein_coding	24.1737	29.6513	31.2649	28.0218	29.6941	28.4692	37.6078	41.5726	40.8983
ENSG00000125772,12	GPCPD1	protein_coding	21.5721	19.2875	17.4499	18.2459	23.3344	21.4943	13.9611	11.6439	14.7521
ENSG00000172500,12	FIBP	protein_coding	61.7249	69.8099	87.2208	89.8141	69.4694	84.3027	93.2075	134.625	116.669
ENSG00000108384,14	RAD51C	protein_coding	67.086	59.4452	82.0211	93.7991	88.5294	81.5419	97.2243	99.726	100.462
ENSG00000128596,16	CCDC136	protein_coding	33.1909	26.0909	20.8726	23.0935	20.6246	25.4727	18.6476	11.3301	16.5332
ENSG00000198739,10	LRRTM3	protein_coding	3.44116	3.47811	2.91604	3.34954	2.507	2.35158	2.12114	1.16065	1.8222
ENSG00000168461,12	RAB31	protein_coding	98.3885	97.8576	77.2088	73.8596	70.2416	73.0569	67.5625	56.4787	74.227
ENSG00000142178,8	SIK1	protein_coding	3.46833	3.57128	0.418948	0.095908	0	0.111725	0.064602	0.564665	0.384615
ENSG00000136463,7	TACO1	protein_coding	23.9367	23.9782	24.2227	27.3058	29.1703	27.9452	30.9371	34.3614	32.2635
ENSG00000131966,13	ACTR10	protein_coding	68.0885	47.8985	69.2148	75.4233	68.0533	77.3929	80.8377	111.615	92.0437
ENSG00000137809,16	ITGA11	protein_coding	4.49053	5.08169	3.31057	3.78335	5.16789	3.04987	2.91218	1.36197	1.96143
ENSG00000026508,18	CD44	protein_coding	60.8494	49.1018	58.5071	83.6758	72.53	68.3565	85.9677	66.0695	75.3514
ENSG00000244398,1	AC116533,1	processed_pseudogene	390.916	499.417	818.511	725.443	629.9	710.159	867.417	1725.54	856.418
ENSG00000061455,10	PRDM6	protein_coding	0.054758	0.331757	0.012578	0.011149	0.020462	0.011779	0	0	0
ENSG00000119938,8	PPP1R3C	protein_coding	61.0848	58.5951	61.1529	35.559	35.4529	35.0207	43.6294	42.1969	48.7508
ENSG00000138834,12	MAPK8IP3	protein_coding	70.4463	83.9045	58.2407	54.4481	55.4169	56.4345	54.0602	31.7731	50.2121
ENSG00000106588,10	PSMA2	protein_coding	325.453	345.997	452.022	401.336	408.068	459.09	462.582	809.113	564.221
ENSG00000112941,13	TENT4A	protein_coding	32.9396	35.3571	25.4878	26.8238	25.1068	29.7811	21.4097	17.1785	24.7196
ENSG00000169876,13	MUC17	protein_coding	0	0.008231	0	0.014556	0	0.015371	0.491493	0.036825	0.006873
ENSG00000186153,16	WWOX	protein_coding	13.5242	22.1381	18.7066	11.409	11.4784	9.51346	9.51406	8.06523	11.55
ENSG00000215252,11	GOLGA8B	protein_coding	34.0211	28.6202	32.672	27.676	23.9657	29.4274	20.5346	21.4014	23.9642
ENSG00000284906,1	AC091057,6	protein_coding	9.82778	9.63917	6.85153	6.38707	7.71722	6.17063	6.01893	3.68774	4.19671
ENSG00000138185,19	ENTPD1	protein_coding	18.3558	19.0687	16.5282	12.1092	11.6232	11.4848	13.1002	8.82288	14.1448
ENSG00000177556,11	ATOX1	protein_coding	110.36	122.514	241.681	171.548	189.772	192.104	242.305	396.194	278.834
ENSG00000150787,7	PTS	protein_coding	52.5127	50.6925	69.9544	63.681	66.5914	68.6908	76.8408	111.531	86.2344
ENSG00000161888,11	SPC24	protein_coding	43.9108	38.9194	33.8044	55.0888	47.2955	52.1294	59.8117	40.779	58.6448
ENSG00000142408,4	CACNG8	protein_coding	7.14593	6.29291	5.21789	4.44435	4.43991	3.96138	4.70251	2.62499	4.12627
ENSG00000168505,6	GBX2	protein_coding	13.4807	9.96845	12.4694	13.1731	14.6412	16.7531	17.2605	17.7601	17.2269
ENSG00000132589,15	FLOT2	protein_coding	128.164	128.977	115.752	143.158	149.285	140.895	152.253	127.561	175.39
ENSG00000031698,12	SARS	protein_coding	128.645	128.264	138.14	204.897	202.354	222.793	165.477	146.447	167.066
ENSG00000178764,7	ZHX2	protein_coding	8.60365	11.5617	7.59274	17.1821	14.9376	13.5297	14.618	10.8476	15.5701
ENSG00000134121,9	CHL1	protein_coding	10.2251	9.50828	6.36879	1.92475	5.28589	3.21008	5.28968	2.3058	3.69646
ENSG00000102931,7	ARL2BP	protein_coding	92.585	80.2877	94.7925	105.068	102.565	103.176	110.043	104.848	119.528
ENSG00000204237,4	OXLD1	protein_coding	27.638	24.9648	28.0986	27.3281	28.7643	31.539	35.2874	42.6323	37.4442
ENSG00000146083,11	RNF44	protein_coding	37.0675	31.5445	26.7316	21.25	25.4624	23.1378	24.6036	17.5611	21.0001
ENSG00000171469,10	ZNF561	protein_coding	38.2598	38.4298	31.7397	52.1838	45.0493	46.1724	60.493	35.3784	60.8899
ENSG00000100162,14	CENPM	protein_coding	37.5064	40.4918	40.3233	50.1803	47.2777	56.6677	53.4968	64.1445	52.1767
ENSG00000147041,11	SYTL5	protein_coding	10.0437	9.70777	8.30322	13.9986	13.6868	13.1607	13.909	10.2597	12.4935
ENSG00000131759,17	RARA	protein_coding	22.5283	23.6088	23.4045	17.0704	18.4391	14.6858	15.938	14.3704	17.0811
ENSG00000131507,10	NDFIP1	protein_coding	72.3216	71.4913	78.7011	69.1733	73.366	73.6343	92.1954	102.174	93.4401
ENSG00000079999,13	KEAP1	protein_coding	64.9664	57.9435	62.254	81.9137	70.0313	88.2961	80.7233	107.46	79.4977
ENSG00000169860,6	P2RY1	protein_coding	2.20094	2.1693	1.90053	1.82216	1.43263	1.77902	1.35727	0.870813	1.38823
ENSG00000177700,5	POLR2L	protein_coding	102.351	121.796	196.528	149.373	134.297	170.411	206.961	407.467	207.721
ENSG00000153363,12	LINC00467	lincRNA	6.23066	6.70757	14.9255	15.8744	9.84958	12.4075	21.4337	17.7312	18.1313
ENSG00000261716,2	HIST2H2BC	transcribed_unprocessed_pseudogene	4.44558	4.97765	3.45419	3.98197	4.05421	4.70988	2.73201	2.18744	3.11988
ENSG00000126062,3	TMEM115	protein_coding	29.0478	28.861	28.2079	32.7752	33.4974	37.2981	36.8841	30.6463	40.3009
ENSG00000147130,14	ZMYM3	protein_coding	38.9589	42.4811	38.0497	34.3353	34.8838	37.1654	32.4707	23.2688	31.5906
ENSG00000127920,5	GNG11	protein_coding	151.659	144.024	192.099	202.553	211.737	208.316	211.76	264.16	220.109
ENSG00000196275,13	GTF2IRD2	protein_coding	20.2166	21.1748	24.6519	22.9529	26.0491	18.2758	28.7172	36.7896	39.0854
ENSG00000177943,13	MAMDC4	protein_coding	15.0267	14.7611	17.4953	13.6995	17.5238	22.3838	20.8773	22.6367	27.0357
ENSG00000175155,8	YPEL2	protein_coding	0.842554	1.53806	1.17215	0.644896	0.90807	0.788514	0.597165	0.408016	0.453533
ENSG00000152102,17	FAM168B	protein_coding	92.2457	83.7669	82.4619	87.4909	91.802	92.2953	72.7157	49.2651	64.7962
ENSG00000144406,18	UNC80	protein_coding	7.09021	6.79404	4.11237	4.87105	5.14701	4.60849	3.90668	3.18392	3.51588
ENSG00000145908,12	ZNF300	protein_coding	33.4706	32.18	33.5266	33.0597	36.051	34.786	26.5739	22.0893	25.1567
ENSG00000168496,3	FEN1	protein_coding	92.7277	105.269	108.632	124.107	125.22	148.149	131.598	158.537	132.311
ENSG00000167700,8	MFSD3	protein_coding	12.0353	12.6795	15.2662	12.527	14.4611	16.2988	18.8026	21.0153	20.3502
ENSG00000158623,14	COPG2	protein_coding	62.5778	61.0622	55.4871	56.7792	57.6304	60.6402	73.7401	60.972	78.4881
ENSG00000168306,12	ACOX2	protein_coding	15.6283	12.9181	22.5098	19.2803	22.6129	26.4775	22.982	38.8584	32.3281
ENSG00000112530,11	PACRG	protein_coding	1.52265	2.30923	1.53067	0.607424	0.528543	0.153576	0	0	0
ENSG00000100139,13	MICALL1	protein_coding	40.6625	40.2676	23.5141	58.8945	50.878	60.7691	52.7938	39.8196	67.5568
ENSG00000171148,13	TADA3	protein_coding	91.3797	101.182	105.522	96.4362	100.301	113.468	119.514	138.647	135.173
ENSG00000186193,8	SAPCD2	protein_coding	33.274	34.1967	28.0068	20.9838	24.9732	29.8351	22.3102	16.6993	24.7627
ENSG00000161791,13	FMNL3	protein_coding	34.392	34.7869	23.6125	25.5836	24.7262	26.5304	20.4839	10.8808	23.4208
ENSG00000188186,10	LAMTOR4	protein_coding	221.639	263.854	357.85	215.225	249.363	297.951	387.387	654.628	413.831
ENSG00000117676,13	RPS6KA1	protein_coding	12.338	10.0959	10.2505	14.5845	15.0899	17.1777	14.7179	12.0421	17.7668
ENSG00000158290,16	CUL4B	protein_coding	43.7986	40.5367	32.5328	32.7571	32.6129	31.4589	28.9032	23.9899	30.6363
ENSG00000261438,1	AL157394,1	sense_overlapping	0.12317	0	0.113641	1.08763	0.648319	1.1599	0.835843	0.788078	1.24335
ENSG00000122592,7	HOXA7	protein_coding	27.4035	22.0085	21.8554	29.3274	33.5639	28.0315	32.6889	26.3439	38.5487
ENSG00000109861,15	CTSC	protein_coding	63.2729	55.8911	76.5081	55.1553	55.0139	55.4168	43.8829	43.4806	42.1464
ENSG00000279208,1	CR381653,2	unprocessed_pseudogene	9.67525	10.0172	11.0512	15.1803	14.9512	14.164	16.1597	13.9745	22.7178
ENSG00000174136,11	RGMB	protein_coding	71.4349	70.0461	60.4032	57.4898	54.9039	56.3036	54.4961	42.0161	54.291
ENSG00000025796,13	SEC63	protein_coding	37.5511	37.7621	32.9953	31.9466	28.1978	27.0244	25.8331	25.1658	21.8157
ENSG00000100038,19	TOP3B	protein_coding	25.5048	21.3946	22.7111	17.0945	19.6847	23.2223	17.0577	13.3777	16.4505
ENSG00000154721,14	JAM2	protein_coding	177.598	178.485	201.659	129.066	132.168	127.125	140.672	130.505	134.955
ENSG00000137842,6	TMEM62	protein_coding	8.33854	7.65689	6.33709	8.14196	10.3297	6.98312	11.7256	10.7295	11.3291
ENSG00000105974,11	CAV1	protein_coding	7.8255	7.07596	5.79735	14.2394	10.0011	7.99867	11.505	9.12268	13.4389
ENSG00000005249,12	PRKAR2B	protein_coding	2.11847	1.78254	1.13043	1.54037	1.89232	1.14729	0.820073	0.53639	0.704237
ENSG00000005243,9	COPZ2	protein_coding	17.9272	16.3465	21.4256	14.9193	17.9034	15.7032	29.1423	35.3953	26.7971
ENSG00000162374,16	ELAVL4	protein_coding	7.63614	9.89492	5.1762	2.8822	3.32363	3.00996	3.17767	2.1114	5.47601
ENSG00000085788,13	DDHD2	protein_coding	60.4015	65.552	42.0008	48.9682	50.5811	54.5775	37.6252	27.6836	43.0595
ENSG00000153044,9	CENPH	protein_coding	56.6932	59.3721	80.3056	73.7703	71.8958	70.6161	87.9288	101.11	95.009
ENSG00000056972,18	TRAF3IP2	protein_coding	17.8558	18.6496	25.2714	23.871	20.1303	26.4387	31.8007	32.0916	29.4141
ENSG00000160446,18	ZDHHC12	protein_coding	6.63756	8.13362	11.3155	8.24027	6.83078	8.77379	13.8	20.9426	14.8943
ENSG00000179085,7	DPM3	protein_coding	98.8273	110.085	170.84	96.0213	114.576	146.02	182.822	364.924	198.127
ENSG00000135929,8	CYP27A1	protein_coding	11.4083	13.9975	12.5094	14.9432	11.6797	18.0824	16.6473	18.2687	22.0205
ENSG00000230724,9	LINC01001	lincRNA	5.03611	4.85493	5.15554	3.18906	3.27893	2.27223	3.20622	1.73942	1.96577
ENSG00000270055,1	AC127502,2	sense_intronic	6.44817	5.79422	6.01375	3.00975	3.96001	4.43873	3.23809	3.64102	3.23071
ENSG00000172667,10	ZMAT3	protein_coding	32.0634	32.0684	13.7535	51.5574	49.7956	37.8014	47.9814	29.0948	71.7878
ENSG00000147155,10	EBP	protein_coding	42.5179	41.2494	47.161	44.4866	49.0192	60.6448	57.3046	83.3532	62.4247
ENSG00000159792,9	PSKH1	protein_coding	24.5841	24.7295	21.2322	24.5959	25.692	28.059	29.3669	25.5251	31.6331
ENSG00000067225,17	PKM	protein_coding	1194.4	1236.5	1256.83	1335.51	1345.09	1504.53	1447.72	1401.7	1546.55
ENSG00000154277,12	UCHL1	protein_coding	667.632	721.756	969.885	863.376	925.392	950.7	1076.12	1435.52	1056.02
ENSG00000277072,4	STAG3L2	transcribed_unprocessed_pseudogene	17.9268	16.108	12.233	12.202	11.2824	10.5616	9.65288	5.70857	11.143
ENSG00000101198,14	NKAIN4	protein_coding	10.8648	8.71517	11.0214	2.06131	3.30606	3.34129	4.3211	5.89752	4.76058
ENSG00000157778,8	PSMG3	protein_coding	102.872	109.601	137.086	136.931	143.48	173.956	159.954	222.817	156.21
ENSG00000135245,9	HILPDA	protein_coding	153.601	159.394	178.404	67.3149	78.8017	77.6485	93.3534	120.813	94.694
ENSG00000227671,4	AL390728,4	transcribed_unprocessed_pseudogene	54.7168	41.7173	60.8851	40.2026	42.3501	41.4655	35.1739	31.5068	34.1047
ENSG00000100348,9	TXN2	protein_coding	73.3358	75.4437	102.862	81.2369	91.4659	97.3701	109.836	186.128	118.916
ENSG00000228253,1	MT-ATP8	protein_coding	4423.97	3651.76	9331.55	4235.4	3656.47	3438.4	3310.43	2758.46	2405.3
ENSG00000106009,15	BRAT1	protein_coding	53.5217	52.5909	49.3446	57.8722	64.4782	75.8683	64.5856	70.9114	66.4968
ENSG00000101098,12	RIMS4	protein_coding	43.9323	48.0331	31.6044	31.0475	32.4451	39.0122	27.0168	17.6669	32.1865
ENSG00000250303,3	AP002884,1	lincRNA	4.71998	5.43262	7.23618	5.1431	5.61575	9.0625	10.27	13.9636	10.5977
ENSG00000113615,12	SEC24A	protein_coding	17.9788	14.1915	13.2311	13.3005	13.0689	12.121	10.9253	8.13768	11.7589
ENSG00000171488,14	LRRC8C	protein_coding	2.64887	2.58273	2.06192	1.95914	2.14814	2.14658	1.55293	1.12477	1.74294
ENSG00000143442,21	POGZ	protein_coding	52.6199	43.375	36.4345	54.5324	46.3375	47.6176	34.157	24.289	30.0934
ENSG00000277639,2	AC007906,2	protein_coding	0.421708	0.389995	1.04452	0.748573	1.96391	0.927205	2.75819	2.10632	2.55626
ENSG00000011295,15	TTC19	protein_coding	34.7648	35.9392	31.4114	38.2409	41.4853	45.9066	43.5502	42.9658	42.0485
ENSG00000116667,13	C1orf21	protein_coding	103.685	89.3649	96.403	55.5411	56.2434	49.0101	77.9843	55.5966	72.1529
ENSG00000168137,15	SETD5	protein_coding	146.363	122.564	76.2461	99.2387	102.273	107.004	75.1901	41.9999	81.4707
ENSG00000213753,10	CENPBD1P1	transcribed_processed_pseudogene	32.9718	30.1945	29.1186	34.9164	34.7315	36.661	33.2467	55.1972	48.9927
ENSG00000108439,10	PNPO	protein_coding	13.066	16.9455	6.72695	13.4425	14.0315	18.2617	21.2088	19.1737	22.2571
ENSG00000196754,10	S100A2	protein_coding	4.14788	4.94083	10.8631	11.1262	8.32521	16.1952	17.6727	16.3892	15.6458
ENSG00000166913,12	YWHAB	protein_coding	179.806	179.538	158.239	209.499	199.774	200.179	193.988	211.903	230.583
ENSG00000185386,14	MAPK11	protein_coding	14.1195	17.9505	14.8116	14.8361	16.1702	16.8262	19.1686	21.9325	23.0437
ENSG00000089685,14	BIRC5	protein_coding	74.0288	84.887	75.7492	101.924	105.32	109.569	95.8231	86.1759	100.372
ENSG00000224837,1	GCSHP5	processed_pseudogene	23.6722	37.8433	42.4452	61.4226	45.2637	72.7391	49.2034	130.462	55.0216
ENSG00000163873,9	GRIK3	protein_coding	11.6534	9.64654	7.37536	4.52014	3.1333	4.27789	6.37971	2.81939	6.14798
ENSG00000100234,11	TIMP3	protein_coding	14.6058	16.6782	13.5828	10.1962	10.2064	10.9555	11.4462	9.78101	10.5822
ENSG00000166681,13	BEX3	protein_coding	341.991	392.364	536.509	374.72	398.637	426.814	570.354	909.351	589.338
ENSG00000099381,17	SETD1A	protein_coding	13.7471	21.2803	14.8136	16.2606	18.1052	18.4123	11.6155	8.39096	11.86
ENSG00000166402,8	TUB	protein_coding	10.3178	11.7145	7.03069	7.63528	8.93437	7.93247	6.73946	4.25409	6.59778
ENSG00000154914,16	USP43	protein_coding	1.19998	1.04287	1.39526	0.468007	0.346926	0.978884	0.511539	0.2563	0.483281
ENSG00000198886,2	MT-ND4	protein_coding	3025.51	2702.68	5932.31	2415.75	2590.22	2121.89	2430.71	1721.42	2100.86
ENSG00000077454,15	LRCH4	protein_coding	41.5348	42.6742	41.5283	37.3076	38.2804	35.7944	29.0525	29.5766	32.9245
ENSG00000130305,16	NSUN5	protein_coding	2.73111	2.40432	3.33854	4.83787	4.89704	7.01469	4.87059	6.07627	5.0873
ENSG00000273047,1	AL121845,2	protein_coding	0	0	0	2.49118	1.67202	0	2.5724	2.26489	4.20602
ENSG00000186185,13	KIF18B	protein_coding	37.4112	36.0052	32.0421	36.8845	34.3212	36.483	29.2159	20.5602	25.8658
ENSG00000182985,17	CADM1	protein_coding	81.2946	81.9336	62.4274	58.8623	63.0716	64.8653	57.7896	42.1481	59.6395
ENSG00000175482,8	POLD4	protein_coding	5.31893	13.7231	15.5073	11.608	10.4101	10.5216	22.609	21.964	25.3476
ENSG00000152256,13	PDK1	protein_coding	30.3736	27.6306	24.9101	10.7294	8.64585	10.6157	22.3053	16.2348	17.1818
ENSG00000175701,10	MTLN	protein_coding	48.8818	65.2777	83.7564	52.1835	71.0172	82.1305	105.206	189.251	94.5911
ENSG00000196605,7	ZNF846	protein_coding	3.02202	2.24449	2.25537	4.48235	1.69691	3.76343	6.29205	4.79823	5.6488
ENSG00000125107,17	CNOT1	protein_coding	97.165	73.8543	93.7149	103.567	99.1835	83.0287	67.501	45.1617	62.8798
ENSG00000166619,13	BLCAP	protein_coding	24.8774	25.7799	23.9937	25.8263	26.5074	31.4345	34.1964	36.9201	30.423
ENSG00000204706,14	MAMDC2-AS1	antisense	3.13422	3.0346	4.22163	2.2248	2.06081	1.80371	1.36521	1.62294	1.69211
ENSG00000141622,13	RNF165	protein_coding	8.32284	8.35219	6.81173	6.84836	5.3137	4.26843	5.42404	3.37376	5.22215
ENSG00000147852,15	VLDLR	protein_coding	6.76	7.89991	6.21871	5.0324	6.35055	6.58251	4.63617	4.37014	3.87255
ENSG00000057657,16	PRDM1	protein_coding	0.651211	0.652823	0.348216	2.30586	2.13245	2.38142	1.05374	0.897549	1.3335
ENSG00000196526,10	AFAP1	protein_coding	19.5373	21.8131	12.8744	11.4764	11.1089	13.0794	12.147	8.39592	13.2044
ENSG00000125743,10	SNRPD2	protein_coding	415.308	489.69	686.097	527.159	546.233	625.344	734.043	1137.15	740.504
ENSG00000132970,12	WASF3	protein_coding	18.988	18.1073	17.5874	14.7088	13.2867	13.2753	14.3515	10.0875	14.4036
ENSG00000205746,9	AC126755,1	transcribed_unprocessed_pseudogene	42.5075	52.1232	32.3199	24.6831	30.4256	34.1059	24.866	11.3087	30.6427
ENSG00000239697,10	TNFSF12	protein_coding	13.7865	10.4301	14.6328	9.54745	12.2514	14.1884	21.8856	25.7536	16.944
ENSG00000144868,13	TMEM108	protein_coding	1.55613	2.09164	2.20302	0.711839	0.763019	0.2927	0.649361	0.672622	0.870132
ENSG00000087266,15	SH3BP2	protein_coding	39.4895	48.0534	37.9174	32.1726	33.1977	32.4326	33.1019	26.1232	30.809
ENSG00000233695,2	GAS6-AS1	antisense	0.160395	0.197176	0.081884	0.159574	0.412996	0.291293	0.590455	0.251707	0.57643
ENSG00000169862,18	CTNND2	protein_coding	45.2523	38.5161	32.7535	20.3879	20.5829	17.9499	27.185	17.7257	30.9863
ENSG00000112312,9	GMNN	protein_coding	65.0518	68.8958	91.932	78.4504	93.0207	93.7617	105.266	125.75	102.214
ENSG00000159212,12	CLIC6	protein_coding	1.03581	1.30617	1.0953	1.318	1.13672	1.48396	2.54839	1.92669	1.78382
ENSG00000096080,11	MRPS18A	protein_coding	47.0212	53.6218	61.144	49.9528	55.2563	50.164	73.7983	78.3962	72.2499
ENSG00000132716,18	DCAF8	protein_coding	76.1356	78.2785	63.7214	58.0313	63.1433	59.5336	59.9458	42.8803	53.0781
ENSG00000175455,14	CCDC14	protein_coding	78.0487	69.3014	80.1203	82.6131	79.6534	77.2668	57.0893	52.0893	59.4018
ENSG00000187713,6	TMEM203	protein_coding	65.6051	70.1109	67.323	71.5969	68.9042	81.8664	81.459	97.208	88.5225
ENSG00000196455,7	PIK3R4	protein_coding	14.4193	13.8874	12.7731	20.0001	15.2772	15.4519	17.2209	23.1472	19.0022
ENSG00000260735,2	AC139256,1	transcribed_processed_pseudogene	0.208216	0.480683	0.023948	0.253079	0.272907	0.268255	1.84973	2.87632	0.200973
ENSG00000166165,12	CKB	protein_coding	483.543	476.886	657.716	540.115	515.192	655.247	660.295	1063.86	795.394
ENSG00000234420,7	ZNF37BP	transcribed_processed_pseudogene	19.3014	18.5108	10.4878	14.1816	16.896	11.3612	11.4848	5.03616	8.82806
ENSG00000086544,2	ITPKC	protein_coding	6.14142	6.06494	5.50418	7.42984	7.11419	9.58111	8.30852	6.93559	9.4145
ENSG00000115170,13	ACVR1	protein_coding	15.3062	16.3217	16.6663	12.2492	13.7553	11.0616	10.5572	10.6725	11.3587
ENSG00000132517,15	SLC52A1	protein_coding	0	0	0	0.082732	0.043031	0.147959	0.259624	0.403824	0.133108
ENSG00000196263,7	ZNF471	protein_coding	9.29983	11.9594	5.18519	7.0936	7.00963	5.22555	4.76127	4.41786	4.3514
ENSG00000214776,12	AC092821,1	transcribed_unprocessed_pseudogene	1.27571	1.21349	0.795082	0.644055	0.603392	0.561491	0.717633	0.279416	0.282102
ENSG00000151692,14	RNF144A	protein_coding	29.0367	29.7624	23.1394	26.7581	25.1277	25.9802	19.5916	15.0953	22.809
ENSG00000154310,16	TNIK	protein_coding	17.7764	22.7319	12.427	7.38821	10.3531	7.74785	11.8657	6.3496	11.3115
ENSG00000156804,7	FBXO32	protein_coding	1.55187	1.64143	1.28021	0.937977	0.312202	0.534195	0.31446	0.454318	0.728638
ENSG00000114268,11	PFKFB4	protein_coding	36.6918	33.5613	34.0359	22.1208	24.1429	22.2733	27.6912	18.2772	27.1686
ENSG00000134115,12	CNTN6	protein_coding	0.572707	0.317869	0.452688	0.167883	0.128884	0.236907	0	0.110185	0.086838
ENSG00000146197,8	SCUBE3	protein_coding	01,01,6487	2.11207	1.3954	1.31386	1.16758	1.47805	1.07156	0.541318	1.09589
ENSG00000075826,16	SEC31B	protein_coding	9.26888	8.62505	12.1335	8.843	7.29283	8.14708	5.53009	6.67534	5.18807
ENSG00000185189,17	NRBP2	protein_coding	37.5764	37.8681	40.4984	24.1098	27.686	28.563	30.1496	23.027	30.8933
ENSG00000033170,16	FUT8	protein_coding	19.1207	20.4525	19.6958	12.2504	12.9267	12.5097	14.1974	11.5749	15.9762
ENSG00000162511,7	LAPTM5	protein_coding	0	0	0.085315	0.134541	0.490863	0.265243	0.55865	0.470418	0.907247
ENSG00000041982,15	TNC	protein_coding	129.445	147.815	107.556	139.623	135.769	136.708	95.5894	53.5192	99.4468
ENSG00000165527,6	ARF6	protein_coding	57.1689	53.2495	42.837	67.4599	67.4024	69.6125	64.1112	57.1086	66.2405
ENSG00000134215,15	VAV3	protein_coding	52.5454	49.3942	41.0607	29.8053	28.1495	37.2375	32.3741	24.9652	39.5849
ENSG00000132623,15	ANKEF1	protein_coding	0.365428	0.494298	0.493957	0.75419	1.07869	0.798426	1.14953	0.871435	0.972196
ENSG00000198954,7	KIF1BP	protein_coding	43.8223	42.0365	46.0055	55.9689	59.0769	57.9035	50.0564	60.0048	60.8614
ENSG00000107551,20	RASSF4	protein_coding	45.9273	44.1561	42.5511	30.7236	30.6987	32.9136	33.3296	31.3328	36.3931
ENSG00000123364,4	HOXC13	protein_coding	3.48351	3.52876	4.08478	4.41379	5.26137	6.0311	5.12168	6.486	6.16268
ENSG00000196440,11	ARMCX4	protein_coding	12.4351	13.6232	11.5984	10.8818	9.80062	10.6112	9.49004	7.47836	10.0423
ENSG00000101290,13	CDS2	protein_coding	31.9058	38.4501	28.4051	34.5913	36.7511	41.6202	40.9281	37.1501	50.0118
ENSG00000148834,12	GSTO1	protein_coding	84.4455	87.7646	115.096	114.646	106.158	121.832	131.543	189.947	124.744
ENSG00000164967,9	RPP25L	protein_coding	9.55648	8.20591	12.9677	11.9987	15.227	13.9878	14.8193	18.3856	20.1644
ENSG00000154079,5	SDHAF4	protein_coding	22.1632	24.6937	27.782	22.467	24.9223	32.2665	35.0585	60.0597	33.4396
ENSG00000090238,11	YPEL3	protein_coding	8.01298	8.21824	18.5832	9.67357	11.754	14.9137	22.5399	26.4527	22.6049
ENSG00000115194,10	SLC30A3	protein_coding	5.03751	3.39913	2.87353	2.39769	4.51099	3.24963	1.59647	1.54253	1.96096
ENSG00000164649,19	CDCA7L	protein_coding	131.471	115.352	130.609	107.494	110.79	106.139	91.7406	91.1071	96.6566
ENSG00000006025,11	OSBPL7	protein_coding	13.4168	12.1077	10.8562	9.32475	7.14257	9.85748	9.31836	5.91733	6.8753
ENSG00000138821,12	SLC39A8	protein_coding	18.0826	16.3047	13.9674	14.1821	12.7939	13.1806	11.1169	10.347	12.1902
ENSG00000147231,13	CXorf57	protein_coding	2.3464	3.95994	3.14584	2.24328	2.01762	3.20518	1.49458	1.45196	1.68992
ENSG00000169189,16	NSMCE1	protein_coding	48.5234	68.4696	72.6214	60.0532	61.1616	68.0825	82.4511	116.812	91.0514
ENSG00000169436,16	COL22A1	protein_coding	32.636	30.8731	38.6827	22.9282	20.1872	24.1154	20.4012	22.1188	26.1976
ENSG00000157379,13	DHRS1	protein_coding	12.1609	10.6426	13.8363	8.93541	7.73307	8.36378	16.3333	27.4462	18.144
ENSG00000166801,15	FAM111A	protein_coding	30.9956	28.5533	24.1632	31.5204	27.4633	26.7274	21.425	16.2318	20.9738
ENSG00000198937,8	CCDC167	protein_coding	88.2644	92.3158	130.231	102.404	114.889	124.564	140.973	197.815	148.143
ENSG00000115548,16	KDM3A	protein_coding	51.1552	53.2741	42.746	37.9401	33.9262	37.9253	36.5367	28.5629	41.1869
ENSG00000162520,14	SYNC	protein_coding	0.85949	1.63554	0.306175	1.55778	1.43112	1.68302	3.09136	1.59237	2.87451
ENSG00000230487,7	PSMG3-AS1	lincRNA	13.1221	16.9029	12.0076	21.3015	22.4755	22.7037	17.112	25.7746	20.1258
ENSG00000103363,14	ELOB	protein_coding	250.107	325.506	415.44	304.722	329.003	337.248	452.542	684.541	451.084
ENSG00000102317,17	RBM3	protein_coding	163.077	139.313	161.033	153.657	160.415	156.465	124.783	103.804	107.993
ENSG00000136720,6	HS6ST1	protein_coding	20.924	21.5069	14.798	25.9112	25.8048	29.4767	28.7639	19.811	30.1679
ENSG00000185798,7	WDR53	protein_coding	11.8755	14.4019	14.0129	19.3777	19.1571	17.0624	21.3279	27.8785	16.9919
ENSG00000102241,11	HTATSF1	protein_coding	47.2544	49.2193	47.7382	60.8172	65.2499	68.5621	55.2886	56.2086	62.7678
ENSG00000102024,17	PLS3	protein_coding	72.4374	82.8057	68.1225	84.8823	84.8363	92.2929	88.7329	81.9616	97.8677
ENSG00000108219,14	TSPAN14	protein_coding	81.2282	91.8558	76.249	107.101	112.343	128.111	107.331	88.2235	109.442
ENSG00000067840,12	PDZD4	protein_coding	57.9566	51.2356	51.2129	35.8396	40.3817	46.2235	42.2908	29.3095	41.6941
ENSG00000203326,11	ZNF525	protein_coding	2.45581	3.94245	2.33464	2.67239	1.70727	2.75042	1.14184	1.14398	1.89238
ENSG00000197872,11	FAM49A	protein_coding	7.43443	6.38514	6.39612	7.23258	6.90157	8.61346	10.3389	7.48117	9.45392
ENSG00000178538,9	CA8	protein_coding	2.42089	1.32193	2.1651	0.564306	0.636494	0.296298	0.503051	0.684706	0.949576
ENSG00000154134,14	ROBO3	protein_coding	16.8691	15.166	21.7917	15.1011	14.7181	15.3741	24.6992	26.3167	27.6526
ENSG00000178467,17	P4HTM	protein_coding	25.5844	22.8669	26.9991	21.7936	21.0635	26.9975	35.6012	30.6133	33.3787
ENSG00000264112,1	AC015813,1	lincRNA	7.93068	8.05311	8.2082	6.75835	6.71443	6.48284	5.84001	4.90742	6.08527
ENSG00000279233,1	AC122688,3	TEC	1.02951	1.26677	0.946774	0.897668	0.884615	0.589876	0.344626	0.40299	0.499983
ENSG00000147509,13	RGS20	protein_coding	8.10175	9.88494	14.9931	14.5385	19.4751	18.7102	17.0798	22.5196	18.4415
ENSG00000168661,14	ZNF30	protein_coding	1.62465	2.75916	2.09428	3.33032	2.94389	3.24142	8.54794	3.01763	3.15515
ENSG00000214753,3	HNRNPUL2	protein_coding	53.2529	44.5398	52.0616	49.2287	46.8401	41.8733	37.6313	30.8311	39.6986
ENSG00000230590,9	FTX	lincRNA	6.9176	8.66511	4.30839	7.41032	7.08972	5.75168	4.36786	2.24256	3.91545
ENSG00000152952,11	PLOD2	protein_coding	117.531	116.454	95.4995	71.0213	63.8828	69.8384	79.7008	73.8874	91.8663
ENSG00000198315,10	ZKSCAN8	protein_coding	21.3953	22.6034	13.1015	20.4165	21.9062	19.0354	12.6585	6.15667	13.5749
ENSG00000244306,11	DUXAP10	transcribed_processed_pseudogene	55.8565	54.7519	46.9589	38.0462	39.4131	40.1273	37.1908	29.7812	46.2236
ENSG00000167283,7	ATP5MG	protein_coding	159.682	165.899	285.261	236.861	227.89	246.405	271.536	446.606	312.014
ENSG00000100804,18	PSMB5	protein_coding	161.154	155.455	232.616	202.645	215.007	220.903	242.388	342.719	252.647
ENSG00000110888,17	CAPRIN2	protein_coding	8.60836	6.41957	9.03402	7.95044	9.21123	8.93738	5.6577	4.33326	01,05,2569
ENSG00000215018,9	COL28A1	protein_coding	1.07624	0.684679	0.415332	0.148809	0.205482	0.16116	0.160896	0.119797	0.223785
ENSG00000104899,7	AMH	protein_coding	53.8392	53.5101	64.5514	38.7402	45.129	54.6132	36.8681	38.9669	35.8958
ENSG00000033011,12	ALG1	protein_coding	12.6178	14.2704	14.8094	18.3652	21.2375	23.3245	19.7878	20.2158	17.9205
ENSG00000079102,16	RUNX1T1	protein_coding	2.9977	5.56876	2.23821	2.95227	2.84958	3.65412	2.49987	0.814718	1.06727
ENSG00000010310,8	GIPR	protein_coding	3.17936	1.47024	2.51199	1.02634	0.608728	1.80368	0.364613	0.78145	1.02998
ENSG00000142684,8	ZNF593	protein_coding	24.1209	28.7848	38.6617	28.1168	39.246	37.55	44.1715	57.7999	49.8172
ENSG00000088305,18	DNMT3B	protein_coding	3.47678	3.2748	3.40799	3.15947	4.48705	3.08524	1.67236	1.87306	2.23548
ENSG00000136237,18	RAPGEF5	protein_coding	46.5237	47.8088	34.2226	25.7639	25.1921	21.6207	30.1047	15.718	32.6035
ENSG00000137804,12	NUSAP1	protein_coding	191.525	179.158	210.165	199.706	194.412	182.876	154.912	118.31	151.707
ENSG00000172164,14	SNTB1	protein_coding	20.6994	21.8691	15.4083	14.2212	16.0313	16.5214	13.1487	10.4583	15.6504
ENSG00000102606,18	ARHGEF7	protein_coding	187.98	186.148	150.172	155.569	158.804	149.824	144.472	98.1389	133.906
ENSG00000143878,9	RHOB	protein_coding	20.1882	19.7096	21.7291	20.7712	24.1309	26.7685	27.7318	28.0035	26.0368
ENSG00000146592,16	CREB5	protein_coding	55.5121	50.6291	35.509	36.381	35.3095	31.0379	36.3444	22.3879	32.4695
ENSG00000185187,12	SIGIRR	protein_coding	3.11233	2.71072	5.73626	2.4477	3.56117	3.34299	7.7284	12.0494	8.841
ENSG00000136895,18	GARNL3	protein_coding	6.05954	11.012	5.9058	01,06,4795	7.10802	3.6134	3.27864	2.61988	4.4741
ENSG00000134072,10	CAMK1	protein_coding	39.0172	40.5005	47.4534	45.3304	44.8512	52.1724	55.3535	66.1673	55.3221
ENSG00000106031,8	HOXA13	protein_coding	7.38855	7.78815	5.82134	5.63867	6.35359	5.78907	5.11814	4.00442	4.91532
ENSG00000240053,8	LY6G5B	protein_coding	9.66584	12.3005	12.613	7.21161	8.06475	6.40476	7.45996	5.94386	8.08337
ENSG00000125652,7	ALKBH7	protein_coding	32.0377	40.8276	47.4598	35.6573	34.3842	41.3665	62.6089	74.3508	50.9251
ENSG00000077616,10	NAALAD2	protein_coding	2.75932	2.02923	2.1134	1.65357	2.00949	1.49219	1.42622	0.913852	0.665559
ENSG00000152926,14	ZNF117	protein_coding	25.7324	24.3131	21.0707	22.6053	22.2356	20.6585	19.6736	12.5341	17.3696
ENSG00000152818,18	UTRN	protein_coding	8.43498	11.1936	3.70073	5.7357	3.6471	5.47576	4.77048	2.33192	3.68515
ENSG00000110013,12	SIAE	protein_coding	19.2448	16.5265	20.6428	17.7086	17.4476	20.8904	25.2525	21.9537	26.6791
ENSG00000167900,11	TK1	protein_coding	42.5348	53.8979	61.5794	54.6969	58.1882	79.7014	73.4472	77.0615	78.5759
ENSG00000104368,17	PLAT	protein_coding	61.5366	56.9733	51.4701	42.0823	42.8218	46.3252	46.1431	37.3115	44.839
ENSG00000106605,10	BLVRA	protein_coding	150.193	181.106	205.974	166.403	182.808	181.385	224.769	308.343	241.426
ENSG00000242247,10	ARFGAP3	protein_coding	26.9322	27.5698	29.337	35.5064	34.6758	35.2693	35.5703	33.2922	34.6918
ENSG00000220842,6	RPL21P16	processed_pseudogene	510.25	606.187	763.124	659.277	632.559	673.057	807.155	1476.09	828.2
ENSG00000167702,12	KIFC2	protein_coding	29.2942	24.8798	30.6334	15.1687	15.6723	19.9312	18.3511	19.694	16.3625
ENSG00000176845,12	METRNL	protein_coding	29.5891	26.8607	30.0552	20.2614	29.2235	36.3427	38.0971	48.3394	44.803
ENSG00000172531,14	PPP1CA	protein_coding	160.019	163.818	172.232	187.418	200.915	216.093	195.874	223.594	209.801
ENSG00000166016,5	ABTB2	protein_coding	5.18374	6.44003	5.11754	8.38641	9.07913	8.16464	7.96676	6.03307	8.68239
ENSG00000255571,8	MIR9-3HG	lincRNA	5.9601	4.65578	3.70045	3.08289	2.94306	4.08712	3.35045	1.85619	1.7783
ENSG00000135205,14	CCDC146	protein_coding	3.38691	3.12927	2.35819	1.5282	2.60351	1.49525	1.21861	0.849374	1.88873
ENSG00000277791,4	PSMB3	protein_coding	196.124	193.6	270.363	238.881	254.411	260.403	293.715	326.991	300.38
ENSG00000123600,19	METTL8	protein_coding	37.5567	27.5075	34.0444	33.5764	36.4058	33.5592	40.7439	38.8404	54.1032
ENSG00000067182,7	TNFRSF1A	protein_coding	66.0788	55.7788	71.0447	94.4325	96.9697	93.6569	81.8529	86.7325	82.326
ENSG00000245526,10	LINC00461	lincRNA	24.2058	21.9383	26.5314	17.7435	19.5129	18.1081	17.8825	16.5092	16.6269
ENSG00000283154,2	IQCJ-SCHIP1	protein_coding	37.611	38.1385	56.5907	25.6276	51.024	30.5024	65.3613	94.067	71.3738
ENSG00000267199,1	AP001029,2	antisense	2.91414	4.86724	3.50943	1.76643	1.6124	3.80054	1.29762	1.27471	01,01,6991
ENSG00000129696,12	TTI2	protein_coding	12.62	12.6349	13.0949	15.3405	15.7368	16.7474	14.9862	16.3469	20.1949
ENSG00000196668,3	LINC00173	processed_transcript	2.66801	3.94881	4.99773	1.09175	0.472042	0.847395	0.609449	1.60255	0.718437
ENSG00000144426,18	NBEAL1	protein_coding	2.4865	3.34286	2.72791	4.16104	1.87352	3.63426	1.3293	1.11726	1.86048
ENSG00000254929,6	AL591684,2	processed_transcript	4.23022	0.566163	1.35084	3.18122	2.06111	1.08203	0.540286	0.147342	0.430953
ENSG00000130520,10	LSM4	protein_coding	249.876	255.126	294.527	252.436	265.951	315.389	329.718	381.779	348.156
ENSG00000233927,4	RPS28	protein_coding	622.92	809.348	1154.74	799.981	822.637	928.979	1166.2	2130.86	1192.63
ENSG00000119771,14	KLHL29	protein_coding	1.90467	1.53176	1.25245	0.732702	0.932665	0.889317	0.877363	0.594864	0.899761
ENSG00000003096,14	KLHL13	protein_coding	9.0936	7.63666	7.43349	5.76241	5.54477	5.67546	6.12902	3.79218	5.67444
ENSG00000225614,2	ZNF469	protein_coding	0.872565	1.1451	0.505334	0.248769	0.256616	0.385866	0.449873	0.240225	0.44786
ENSG00000106400,11	ZNHIT1	protein_coding	100.208	124.295	147.49	115.376	118.35	143.698	158.029	244.453	170.967
ENSG00000159231,5	CBR3	protein_coding	30.3589	28.3766	37.818	35.9474	44.1064	47.6146	41.561	55.3577	46.5668
ENSG00000133401,15	PDZD2	protein_coding	52.3251	53.6674	31.429	32.7939	26.8152	30.8417	24.4432	17.5877	38.0852
ENSG00000105971,14	CAV2	protein_coding	2.90019	6.18213	3.84701	4.84088	6.24893	6.24747	4.72776	9.80448	11.2617
ENSG00000108840,15	HDAC5	protein_coding	31.5046	33.2263	24.8071	27.9579	32.1362	34.4914	44.4801	30.1078	45.488
ENSG00000250337,5	PURPL	lincRNA	1.1337	0.546456	0.449352	1.06606	1.36329	1.98048	1.92244	1.56741	3.10123
ENSG00000173207,12	CKS1B	protein_coding	201.269	223.882	304.448	260.107	275.687	292.927	324.038	506.643	320.447
ENSG00000105341,18	DMAC2	protein_coding	40.66	38.9117	44.2241	46.9284	56.0846	55.3516	50.982	54.8581	55.2205
ENSG00000148840,10	PPRC1	protein_coding	30.4535	28.1815	27.9104	26.1387	26.568	28.5009	23.3599	19.4323	23.7258
ENSG00000111596,12	CNOT2	protein_coding	52.1353	50.8098	47.5569	47.9745	45.1646	41.9252	40.6277	27.1183	39.2185
ENSG00000272752,6	STAG3L5P-PVRIG2P-PILRB	processed_transcript	25.7405	24.4926	30.0303	18.029	20.2225	23.3158	17.1844	18.6102	18.3612
ENSG00000163590,13	PPM1L	protein_coding	7.67089	8.68141	4.41142	6.84438	6.38927	6.98625	5.03893	2.98912	4.01268
ENSG00000140365,15	COMMD4	protein_coding	81.2061	80.7449	118.827	114.75	96.2514	122.662	122.043	214.065	129.373
ENSG00000240972,1	MIF	protein_coding	371.506	425.509	693.852	353.036	383.418	398.601	705.669	981.173	718.402
ENSG00000278259,4	MYO19	protein_coding	35.1291	37.8238	30.3311	29.7431	29.1023	24.7444	23.6676	20.4531	27.7874
ENSG00000135905,19	DOCK10	protein_coding	40.687	40.3725	19.4237	17.4614	21.1241	16.2878	22.8944	12.0572	20.3582
ENSG00000267673,6	FDX2	protein_coding	26.472	23.7551	30.0263	27.5801	22.6243	37.2187	37.2943	50.398	40.7254
ENSG00000177879,15	AP3S1	protein_coding	47.6645	53.5734	76.1888	69.2788	62.7258	68.3722	74.328	103.648	93.0946
ENSG00000070759,16	TESK2	protein_coding	1.08443	1.14429	1.43197	0.251135	0.231783	0.260902	0.466414	0.381818	0.435136
ENSG00000175793,11	SFN	protein_coding	0	0	0	0.090387	0.253488	0.288915	0.254301	0.785736	0.348937
ENSG00000183336,8	BOLA2	protein_coding	21.2416	25.8902	36.3028	28.7048	30.296	42.7849	39.4839	78.9554	38.5631
ENSG00000223749,9	MIR503HG	lincRNA	22.8403	28.4535	32.2381	10.273	12.0968	14.3711	13.3806	15.5353	16.5498
ENSG00000183248,11	PRR36	protein_coding	10.204	10.1658	10.5649	8.67167	9.64352	7.94205	7.63881	6.76904	7.32262
ENSG00000198846,5	TOX	protein_coding	1.61462	2.13218	1.76102	0.565909	0.947392	0.544353	0.929882	0.7999	0.927477
ENSG00000279400,1	AC008957,3	TEC	4.16235	4.52383	2.02829	3.36871	2.7521	3.62609	1.89079	0.896215	1.89198
ENSG00000086289,11	EPDR1	protein_coding	29.242	27.1947	31.4281	44.0142	40.568	46.9557	36.6258	39.7741	37.1533
ENSG00000138604,9	GLCE	protein_coding	4.44958	3.24316	3.0055	3.54389	2.64023	2.59373	2.45686	1.64392	1.87811
ENSG00000119392,14	GLE1	protein_coding	39.9879	36.5889	31.6137	48.268	46.4995	48.2071	43.9314	37.5227	52.3701
ENSG00000136811,16	ODF2	protein_coding	71.8679	71.1755	66.3372	59.3632	66.0149	64.0469	57.9985	42.9274	57.4029
ENSG00000176046,8	NUPR1	protein_coding	0.662869	0.831763	0.990626	2.90096	3.5035	3.45012	1.434	2.23055	2.00773
ENSG00000167315,17	ACAA2	protein_coding	55.1146	64.921	60.9904	65.9399	62.4785	72.3263	74.4879	87.1238	76.1168
ENSG00000166924,8	NYAP1	protein_coding	9.54704	8.94364	9.15898	4.89752	5.9536	5.56393	6.15933	6.02762	6.668
ENSG00000085831,15	TTC39A	protein_coding	1.43006	1.29987	1.44599	1.70472	3.05873	1.88833	2.74236	2.98992	2.89387
ENSG00000058600,15	POLR3E	protein_coding	29.8813	36.9989	32.4432	35.8875	32.7441	34.3111	20.2189	20.3989	27.7626
ENSG00000243302,3	AC018638,4	processed_pseudogene	17.5692	16.504	9.45011	13.7172	14.1927	12.5361	01,09,2142	2.96169	7.995
ENSG00000179604,9	CDC42EP4	protein_coding	36.3406	30.3971	33.2105	41.7534	46.1814	47.6376	39.5592	40.1036	43.2552
ENSG00000076242,14	MLH1	protein_coding	63.3408	63.7999	63.3339	79.9059	75.9291	84.4085	77.5373	96.0064	77.439
ENSG00000014641,17	MDH1	protein_coding	119.078	132.879	159.344	140.846	144.193	146.604	177.849	255.815	172.965
ENSG00000188338,14	SLC38A3	protein_coding	11.3159	11.8436	12.0569	7.25775	8.674	10.6998	8.04033	6.53438	8.33784
ENSG00000182809,10	CRIP2	protein_coding	148.625	139.23	206.938	157.909	173.139	202.774	217.587	270.068	231.05
ENSG00000163435,15	ELF3	protein_coding	0	0	0.035764	0.178175	0.170057	0.035952	0.321887	1.1251	0.318156
ENSG00000224189,7	HAGLR	antisense	10.8054	9.50667	5.32362	5.46066	10.6227	4.36874	4.08152	3.1845	4.63339
ENSG00000133597,10	ADCK2	protein_coding	31.385	26.0582	22.9164	25.7569	24.7432	30.8949	33.9134	34.961	35.7284
ENSG00000095303,15	PTGS1	protein_coding	2.50003	2.68002	2.16836	2.81386	01,02,5235	2.21714	3.81989	2.92779	4.22178
ENSG00000154175,16	ABI3BP	protein_coding	0.422808	0.463071	0.551407	0.777886	0.056426	0.079155	0	0.07337	0.043598
ENSG00000204580,13	DDR1	protein_coding	374.155	382.047	335.987	355.705	337.989	425.43	477.369	382.425	461.858
ENSG00000151657,11	KIN	protein_coding	14.1829	15.1553	12.5513	11.7625	13.7692	14.184	23.9549	18.2469	16.829
ENSG00000087086,14	FTL	protein_coding	853.338	947.508	1564.4	1250.25	1365.05	1415.64	1544.99	2107.61	1655.16
ENSG00000244560,7	AC004890,2	transcribed_unprocessed_pseudogene	8.12658	7.94959	7.74097	3.75783	4.46235	7.05595	4.66386	2.86243	5.00904
ENSG00000113657,12	DPYSL3	protein_coding	10.95	10.4181	7.85592	8.89123	8.25308	9.42371	6.47479	5.10484	7.96788
ENSG00000151689,12	INPP1	protein_coding	6.88861	7.93271	9.30843	12.5381	11.7255	9.34661	13.4588	10.9284	12.4111
ENSG00000105258,8	POLR2I	protein_coding	43.8431	67.1289	96.8453	72.0371	71.2234	75.0091	96.8623	193.85	101.605
ENSG00000175264,7	CHST1	protein_coding	1.13976	1.29601	1.21571	2.69676	2.60357	4.37477	2.03952	2.33145	2.48974
ENSG00000130313,6	PGLS	protein_coding	73.2213	79.7673	103.909	84.2248	87.8943	108.061	104.827	163.778	124.772
ENSG00000151366,12	NDUFC2	protein_coding	184.302	218.94	313.296	248.689	247.702	292.176	316.555	553.853	326.264
ENSG00000162585,16	FAAP20	protein_coding	59.7626	63.5988	78.955	59.812	66.5121	77.2173	86.3506	118.038	92.1202
ENSG00000167863,11	ATP5PD	protein_coding	248.813	307.897	435.151	310.873	373.383	386.841	437.142	775.054	457.547
ENSG00000185565,11	LSAMP	protein_coding	51.7885	46.0254	26.1953	22.8312	21.977	19.9345	26.533	21.2665	28.9154
ENSG00000165300,7	SLITRK5	protein_coding	1.02611	0.916313	0.789948	0.822065	0.788711	0.724941	0.611771	0.405432	0.684519
ENSG00000198453,12	ZNF568	protein_coding	8.26799	7.69569	7.23511	12.0909	10.5837	13.1282	12.3287	8.60896	10.922
ENSG00000198677,11	TTC37	protein_coding	51.3164	51.8642	38.1081	39.1225	42.2847	39.5095	32.9895	23.1835	39.8427
ENSG00000162086,14	ZNF75A	protein_coding	31.4718	25.5179	24.3571	27.626	27.6807	26.1165	17.5955	15.7724	22.4472
ENSG00000137133,10	HINT2	protein_coding	25.8587	37.2804	41.2441	31.3541	28.6354	28.5961	50.96	68.8406	49.6045
ENSG00000048028,11	USP28	protein_coding	22.2546	22.324	19.4223	24.864	20.7224	22.6701	16.757	10.6922	16.3837
ENSG00000105928,14	GSDME	protein_coding	46.6388	45.5347	46.2318	52.2314	52.819	55.3642	55.5288	60.5845	56.021
ENSG00000272405,1	AL365181,3	antisense	5.64989	6.1663	4.79819	10.3072	9.07545	9.88742	7.45501	6.14834	9.73614
ENSG00000285130,1	AL358113,1	protein_coding	1.13722	0.52953	1.27206	0.947574	0.788333	1.69535	0.412452	0	0
ENSG00000196123,12	KIAA0895L	protein_coding	35.4825	39.3075	50.3616	21.3035	27.7097	34.6161	29.5854	22.5856	26.1066
ENSG00000131187,9	F12	protein_coding	6.66318	5.08683	7.41354	6.07295	5.79998	8.312	9.77964	13.6678	9.65734
ENSG00000058404,19	CAMK2B	protein_coding	6.19703	5.58345	4.12126	3.36159	2.20767	2.95958	3.92497	1.50179	2.20975
ENSG00000135637,13	CCDC142	protein_coding	13.8198	13.1399	7.20525	10.699	11.7719	12.4671	7.05345	4.59915	7.25479
ENSG00000162517,12	PEF1	protein_coding	50.785	54.8697	59.0128	57.1442	58.2858	73.1158	71.8121	68.0418	71.6657
ENSG00000174576,9	NPAS4	protein_coding	0	0.037062	0.050988	0.065182	0.030057	0.095163	1.52169	0.047147	0.244356
ENSG00000122873,11	CISD1	protein_coding	46.3321	44.2664	64.2453	48.1152	64.195	54.8937	66.106	94.1003	78.8435
ENSG00000175322,11	ZNF519	protein_coding	13.2067	19.5724	9.76082	13.0039	12.3588	13.0352	8.89316	8.45383	6.85786
ENSG00000139719,10	VPS33A	protein_coding	10.8468	11.4888	10.7117	18.4807	18.3553	18.3258	17.2909	13.5959	12.855
ENSG00000147180,16	ZNF711	protein_coding	18.1221	15.6179	16.0878	16.4259	16.8404	19.2514	12.9651	9.97007	13.3953
ENSG00000213190,3	MLLT11	protein_coding	58.2957	60.8357	87.2195	84.4957	81.3873	86.7301	91.533	119.437	91.2749
ENSG00000152061,23	RABGAP1L	protein_coding	7.18274	7.79931	2.76936	2.80429	4.35987	2.38606	3.31853	1.93034	2.55364
ENSG00000135298,13	ADGRB3	protein_coding	10.9363	10.1518	7.63951	3.91267	4.79749	4.91545	6.654	5.0982	7.36565
ENSG00000105339,10	DENND3	protein_coding	8.24078	6.43625	5.09132	3.21137	4.53176	3.50701	3.54999	3.63512	4.18508
ENSG00000163798,13	SLC4A1AP	protein_coding	18.5569	18.2806	14.9835	23.2527	22.1824	22.9088	20.2037	20.1976	25.1762
ENSG00000161544,9	CYGB	protein_coding	3.25695	2.89119	2.85441	1.7161	01,02,8162	2.05695	5.09503	4.71319	5.36665
ENSG00000164597,13	COG5	protein_coding	38.5018	38.5384	31.6967	26.2869	26.3209	21.3831	30.6598	13.1679	21.1088
ENSG00000134324,11	LPIN1	protein_coding	13.7366	14.5922	12.0104	14.3287	11.552	10.4939	10.0686	6.2172	9.96741
ENSG00000175938,6	ORAI3	protein_coding	4.8646	5.00903	5.39689	4.94386	5.44912	6.51016	6.64268	8.24923	8.12777
ENSG00000108443,13	RPS6KB1	protein_coding	21.9748	23.716	18.7759	29.6813	28.3084	25.9143	15.8939	12.4618	17.6015
ENSG00000205593,11	DENND6B	protein_coding	2.99924	3.71683	4.50098	3.18578	5.53754	7.56495	7.19092	7.00375	5.96485
ENSG00000101003,9	GINS1	protein_coding	32.8969	35.0164	33.4872	47.234	46.0001	46.9303	38.438	45.1368	43.6603
ENSG00000188807,12	TMEM201	protein_coding	23.9146	25.0078	21.5291	27.4748	25.8849	30.8795	27.8417	26.1833	31.4639
ENSG00000116117,17	PARD3B	protein_coding	5.16586	5.19054	3.19814	1.84699	1.27359	1.24799	1.76996	1.35873	3.62726
ENSG00000225217,1	HSPA7	unprocessed_pseudogene	15.1643	15.2485	17.2508	7.96681	8.99614	6.89093	9.61935	10.8085	9.73485
ENSG00000168393,12	DTYMK	protein_coding	107.519	119.995	143.195	134.648	131.819	159.027	156.874	210.391	161.23
ENSG00000146830,10	GIGYF1	protein_coding	45.6757	49.1255	31.0513	35.7539	41.8213	44.6796	29.6194	23.2079	31.8642
ENSG00000139832,4	RAB20	protein_coding	8.86369	9.78859	9.0037	3.99308	3.86398	4.16659	4.38209	5.00471	6.71991
ENSG00000198933,9	TBKBP1	protein_coding	15.9372	14.9907	13.5654	10.1572	9.81633	14.5352	11.453	8.49562	8.02615
ENSG00000079308,18	TNS1	protein_coding	2.3359	3.59719	0.63295	0.816863	0.764145	0.969436	0.785801	0.397443	1.13422
ENSG00000136111,13	TBC1D4	protein_coding	6.01748	5.80246	3.81933	3.4478	4.32671	3.80548	3.06563	2.71927	3.9041
ENSG00000161996,18	WDR90	protein_coding	41.863	53.6727	39.8743	43.3783	36.6386	49.7721	34.277	26.3997	31.1638
ENSG00000171067,10	C11orf24	protein_coding	32.7866	27.7266	36.5681	38.6933	41.0232	37.7855	40.5309	42.6897	44.988
ENSG00000122692,8	SMU1	protein_coding	18.3377	17.8337	17.0984	20.5642	21.1929	22.3506	21.4011	19.4709	21.1053
ENSG00000134077,15	THUMPD3	protein_coding	45.235	60.3311	56.2335	82.0644	63.3619	72.2691	72.4168	72.4094	72.0287
ENSG00000271303,1	SRXN1	protein_coding	12.5443	14.4091	14.8193	24.3609	25.5525	24.5676	18.7481	16.4767	18.0915
ENSG00000135002,11	RFK	protein_coding	28.7236	22.452	23.0208	36.6416	31.0361	36.6695	31.7373	26.9942	36.7485
ENSG00000187961,13	KLHL17	protein_coding	28.6554	31.0803	30.5224	19.4307	19.8704	25.6952	17.7313	21.3047	19.5508
ENSG00000063438,16	AHRR	protein_coding	8.2864	11.5734	7.11329	11.7277	16.4437	14.4961	16.5102	9.4546	15.2554
ENSG00000161692,17	DBF4B	protein_coding	18.6417	22.4185	21.7531	19.2753	20.4255	23.1037	15.8859	13.1837	15.0089
ENSG00000003436,15	TFPI	protein_coding	80.9961	76.8138	59.2609	50.3884	51.2209	47.4797	56.9274	39.1016	56.7812
ENSG00000186230,6	ZNF749	protein_coding	10.2776	11.6841	9.78017	12.5326	14.4266	12.8892	13.626	15.466	15.6435
ENSG00000148356,13	LRSAM1	protein_coding	19.7323	20.4414	21.4269	19.038	18.8569	20.9707	29.3809	20.9389	28.2042
ENSG00000251022,6	THAP9-AS1	antisense	36.6302	41.864	45.5362	47.25	40.5723	39.7161	30.0922	23.919	32.066
ENSG00000123384,13	LRP1	protein_coding	80.3194	84.804	51.4966	53.4748	49.2424	53.6229	53.295	38.6934	53.2432
ENSG00000184445,11	KNTC1	protein_coding	64.0188	70.1665	67.6045	62.7618	64.3933	64.4519	50.3922	50.7699	50.0348
ENSG00000072818,11	ACAP1	protein_coding	0.02647	0	0	0	0.040453	0.166797	0.019934	0.624593	0.829513
ENSG00000142541,16	RPL13A	protein_coding	1030.07	1267.43	1485.92	1272.9	1229.02	1435.65	1547.6	2504.25	1666.34
ENSG00000100625,8	SIX4	protein_coding	8.52389	6.26002	5.37057	5.70453	4.80876	4.25265	5.06292	2.77235	4.12812
ENSG00000161267,11	BDH1	protein_coding	0	0	0	0.033554	0.05959	0.034211	0	1.06785	0.031903
ENSG00000186010,18	NDUFA13	protein_coding	183.926	192.766	289.143	204.018	210.948	229.295	271.192	495.017	314.18
ENSG00000106852,15	LHX6	protein_coding	3.20602	3.70433	3.10777	2.13945	2.00269	1.8832	2.01228	1.63502	2.24856
ENSG00000236017,8	ASMTL-AS1	antisense	16.6676	10.144	15.3166	2.58236	7.84357	8.10772	6.63722	5.37652	4.0731
ENSG00000115461,4	IGFBP5	protein_coding	16.4428	17.1317	13.3174	5.74842	5.76073	6.25429	12.4906	8.15487	12.0927
ENSG00000196655,11	TRAPPC4	protein_coding	59.6274	61.6936	82.0283	72.0219	83.7072	99.6618	92.7114	152.876	85.4658
ENSG00000101266,18	CSNK2A1	protein_coding	151.743	155.669	122.53	142.386	135.339	138.624	111.01	74.8057	120.217
ENSG00000171530,13	TBCA	protein_coding	312.164	363.878	548.635	433.237	402.326	432.525	524.557	967.22	561.994
ENSG00000125445,10	MRPS7	protein_coding	86.7145	94.7716	112.747	103.894	110.978	111.916	125.692	137.688	125.952
ENSG00000108830,9	RND2	protein_coding	9.86647	9.77382	9.85505	7.66002	9.44806	10.1394	12.5376	11.5607	13.6422
ENSG00000146670,9	CDCA5	protein_coding	56.6497	59.6585	59.7452	83.8984	86.262	101.569	70.7598	70.1068	73.4731
ENSG00000113739,10	STC2	protein_coding	10.5185	12.8933	12.7715	8.05861	8.98798	10.7362	9.86237	6.34634	5.44619
ENSG00000070159,13	PTPN3	protein_coding	3.30358	2.97437	2.6804	3.6592	3.27209	3.73878	3.66533	4.03123	4.24783
ENSG00000166451,13	CENPN	protein_coding	56.0688	51.3178	58.3476	67.0927	65.5938	86.3267	75.2518	74.7483	68.6045
ENSG00000274523,4	RCC1L	protein_coding	83.6005	91.5996	81.1489	90.7369	93.1274	121.252	103.584	103.761	114.488
ENSG00000161036,12	LRWD1	protein_coding	49.4587	51.2755	51.1488	55.8454	55.3848	71.1911	58.5086	85.9479	68.3402
ENSG00000085117,11	CD82	protein_coding	48.3391	42.4833	34.0913	19.8571	18.3545	21.9174	34.7824	17.893	23.2002
ENSG00000104859,14	CLASRP	protein_coding	88.9822	76.0649	99.3281	56.739	63.467	65.8363	58.9967	63.5008	48.3835
ENSG00000105649,9	RAB3A	protein_coding	5.83495	8.40451	13.0795	2.51496	2.98225	2.57698	3.49313	4.19427	5.27595
ENSG00000267339,5	LINC00906	lincRNA	0	0	0	0.031174	0.05748	0.033004	0	1.14769	0.029621
ENSG00000283930,1	AL117339,5	protein_coding	2.30386	2.53596	2.82452	1.49701	0.997915	1.75573	1.35665	1.41124	1.30698
ENSG00000260261,2	AC124944,3	transcribed_unprocessed_pseudogene	4.84964	17.2151	3.52257	9.16733	3.4488	9.03293	2.91525	1.99665	3.85912
ENSG00000156502,13	SUPV3L1	protein_coding	18.6186	21.3537	30.5888	32.0765	28.2341	35.4018	33.1588	42.5445	32.9687
ENSG00000158352,15	SHROOM4	protein_coding	0	1.19306	0.046256	0.050042	0.030653	0.012249	0	0.033527	0
ENSG00000125651,13	GTF2F1	protein_coding	75.9523	59.4631	62.9365	70.998	70.738	81.0108	53.984	42.0902	48.1246
ENSG00000161955,16	TNFSF13	protein_coding	0.69317	0.367834	1.35963	1.1896	1.40375	1.5625	1.96879	2.37433	2.598
ENSG00000258465,7	AL139011,2	protein_coding	2.01482	1.20057	0.087406	0.354133	0.741187	0	0.136355	0	0
ENSG00000143641,9	GALNT2	protein_coding	101.334	96.8386	91.3447	70.4521	70.3887	81.5537	81.6071	63.9569	78.4656
ENSG00000000003,14	TSPAN6	protein_coding	28.8239	29.6834	33.6773	31.2512	32.7115	34.2577	37.841	44.4265	39.1314
ENSG00000119866,21	BCL11A	protein_coding	6.87436	5.64835	3.01134	3.53035	2.66511	4.31617	2.47222	2.81662	2.17169
ENSG00000100697,14	DICER1	protein_coding	17.5359	16.2024	10.4708	16.028	16.0501	14.2324	10.8924	7.24174	10.5103
ENSG00000171056,7	SOX7	protein_coding	1.11571	0.953498	1.07564	1.70344	1.7012	1.21459	2.17873	1.76775	1.78536
ENSG00000088833,17	NSFL1C	protein_coding	71.1456	72.8982	71.7368	86.6491	88.6607	87.3242	85.3431	79.2308	87.4739
ENSG00000183011,13	NAA38	protein_coding	52.1201	65.8205	98.6632	69.7823	90.5506	88.6709	108.395	163.627	98.3038
ENSG00000025708,13	TYMP	protein_coding	0.494964	0.472317	0.631674	0.908699	1.20417	0.881062	1.56794	1.49411	1.42488
ENSG00000285815,1	WRB-SH3BGR	protein_coding	0.155848	0.968495	0.300132	0.474317	1.12627	1.47128	1.79104	1.26103	2.4346
ENSG00000135631,16	RAB11FIP5	protein_coding	8.1991	8.71064	6.65533	5.50012	4.01655	4.86722	5.64902	4.5061	5.46047
ENSG00000108352,12	RAPGEFL1	protein_coding	9.70369	4.33793	7.07698	6.19219	8.72671	7.5628	4.13078	3.48462	3.6878
ENSG00000149532,15	CPSF7	protein_coding	72.4208	75.196	74.7382	73.5296	75.0906	73.6001	63.9204	43.3656	58.0779
ENSG00000116754,13	SRSF11	protein_coding	190.013	185.259	159.836	165.688	169.245	161.666	133.237	102.647	159.466
ENSG00000134186,11	PRPF38B	protein_coding	56.0885	54.099	45.2291	50.7371	48.4626	49.9988	40.9686	35.0021	42.4327
ENSG00000143545,8	RAB13	protein_coding	126.146	117.019	150.275	122.239	140.924	141.855	164.918	186.104	168.873
ENSG00000156026,14	MCU	protein_coding	13.1553	15.5702	16.856	14.589	12.5608	13.2746	10.7241	8.14385	12.0461
ENSG00000065361,15	ERBB3	protein_coding	18.6285	13.1254	8.272	8.91116	10.3439	8.04384	6.80257	6.97321	8.96466
ENSG00000141127,14	PRPSAP2	protein_coding	30.3697	35.0101	39.3753	36.0397	38.7316	38.507	45.0825	45.6703	45.9685
ENSG00000249464,5	LINC01091	lincRNA	0.443918	1.16698	0.062573	0.10096	0.524087	0.564605	0	0.065415	0
ENSG00000135365,15	PHF21A	protein_coding	43.4737	45.1034	33.3125	40.8677	35.3119	41.4624	29.8064	27.6063	29.3039
ENSG00000162613,16	FUBP1	protein_coding	175.419	153.415	146.052	138.274	142.393	141.525	116.885	114.62	132.819
ENSG00000162623,15	TYW3	protein_coding	14.3489	16.0283	13.5974	16.8005	18.8454	14.2757	19.0224	18.0244	20.1642
ENSG00000162068,1	NTN3	protein_coding	0.770831	0.712398	0.258091	0.849718	0.788055	0.721657	2.00645	0.983998	1.78817
ENSG00000155090,14	KLF10	protein_coding	15.6648	16.1696	15.8094	16.1859	17.4453	15.6904	20.9848	17.5873	20.0167
ENSG00000213221,4	DNLZ	protein_coding	39.867	34.6721	44.5121	44.135	42.8395	55.0758	49.1315	82.8329	55.7243
ENSG00000166171,12	DPCD	protein_coding	38.2492	54.8562	58.1212	49.2632	53.7493	53.4706	62.0955	105.161	72.227
ENSG00000168811,6	IL12A	protein_coding	3.59089	4.20248	5.78926	4.78486	5.12323	5.28148	7.292	7.44436	8.15781
ENSG00000182718,16	ANXA2	protein_coding	464.572	498.196	640.769	542.445	564.622	623.872	650.199	854.344	717.198
ENSG00000117598,11	PLPPR5	protein_coding	2.44887	1.81324	1.88861	3.17121	2.64296	2.09614	3.03969	3.16311	3.50177
ENSG00000185742,6	C11orf87	protein_coding	0.7215	0.604853	0.522447	0.889368	1.4059	1.10949	1.05369	0.977411	1.17898
ENSG00000126746,17	ZNF384	protein_coding	61.2687	55.6908	60.7162	52.4121	52.2142	58.6961	50.4231	31.0269	44.063
ENSG00000141552,17	ANAPC11	protein_coding	174.432	206.385	255.519	180.261	208.655	241.09	277.518	448.94	271.128
ENSG00000174684,6	B4GAT1	protein_coding	46.9108	43.2248	53.2163	47.828	44.8311	46.3442	60.4196	74.9383	58.9439
ENSG00000006015,17	REX1BD	protein_coding	28.7374	31.284	37.4701	25.5421	35.7223	44.0809	49.3503	62.8668	42.0955
ENSG00000255874,2	LINC00346	lincRNA	0.184374	0.358914	0.178857	0.716794	0.796456	0.634359	0.725032	0.302101	0.710085
ENSG00000121904,17	CSMD2	protein_coding	10.5189	10.5418	6.66459	7.14133	7.67337	8.04909	7.33331	3.26127	5.70908
ENSG00000260193,1	AL138781,1	lincRNA	0.913466	0.434708	0.757642	0.754119	2.02864	1.60766	2.47705	1.57077	2.27676
ENSG00000111639,7	MRPL51	protein_coding	192.332	184.352	310.041	274.471	266.33	269.058	305.252	479.869	309.715
ENSG00000177606,6	JUN	protein_coding	85.2122	83.9343	80.265	66.2162	69.5735	78.3669	99.036	89.9803	100.036
ENSG00000149927,17	DOC2A	protein_coding	1.78186	2.7319	3.47459	0.884234	0.641159	1.1061	1.19675	0.981476	1.12866
ENSG00000085998,13	POMGNT1	protein_coding	80.3194	67.6027	68.3388	67.3711	64.4015	73.6982	81.8451	130.475	93.7344
ENSG00000235098,8	ANKRD65	protein_coding	0.625149	0.290218	0.444036	0.946903	0.263027	0.604791	1.20479	1.606	1.41692
ENSG00000182359,14	KBTBD3	protein_coding	5.54482	3.26897	3.86126	2.91957	3.64819	3.56265	6.89208	7.11521	6.31065
ENSG00000072506,12	HSD17B10	protein_coding	85.3001	100.759	131.909	101.252	108.334	132.151	133.907	196.919	149.296
ENSG00000137267,5	TUBB2A	protein_coding	265.479	256.373	310.271	279.606	304.153	315.592	350.782	316.071	353.215
ENSG00000178896,8	EXOSC4	protein_coding	33.1182	30.2417	31.9937	34.765	37.5254	41.2818	40.7132	58.2766	40.3644
ENSG00000105254,11	TBCB	protein_coding	157.592	158.868	197.077	193.24	168.09	203.58	224.095	323.632	208.367
ENSG00000169085,12	VXN	protein_coding	12.1866	7.87597	10.7864	7.88739	5.68362	5.96174	6.97219	5.21018	6.93518
ENSG00000119139,19	TJP2	protein_coding	5.33824	6.45522	5.08972	5.07416	6.04895	7.73954	3.13655	3.16913	4.18451
ENSG00000164050,12	PLXNB1	protein_coding	72.3516	74.5713	59.1606	64.8714	53.502	62.8736	55.5761	38.8994	53.5475
ENSG00000149295,13	DRD2	protein_coding	2.79449	2.15303	2.52236	5.03802	3.59804	3.25416	3.96692	3.90741	4.16932
ENSG00000101104,12	PABPC1L	protein_coding	26.1641	25.1311	36.1394	19.3995	19.8463	23.7148	19.6527	18.4397	18.322
ENSG00000227811,2	INKA2-AS1	bidirectional_promoter_lncRNA	15.0972	13.3692	13.2601	16.0645	15.6838	18.3417	20.7294	14.4022	20.0054
ENSG00000213689,13	TREX1	protein_coding	10.8982	9.97687	21.1121	17.0794	11.4269	13.9931	22.4243	29.4646	26.1449
ENSG00000170291,14	ELP5	protein_coding	42.1557	38.7905	50.4342	50.5272	48.4664	46.9379	56.0117	64.7426	56.7222
ENSG00000159377,10	PSMB4	protein_coding	268.614	313.051	396.316	352.017	359.206	377.801	393.777	594.595	442.252
ENSG00000075292,18	ZNF638	protein_coding	62.1041	58.5091	53.7639	76.7092	68.58	72.6412	61.8557	81.4151	81.8272
ENSG00000197885,10	NKIRAS1	protein_coding	14.8454	19.73	19.509	19.4817	17.369	18.4814	23.9911	21.7583	26.9046
ENSG00000198089,15	SFI1	protein_coding	27.5712	37.3147	26.7031	20.0789	26.0812	32.7071	22.1081	17.4115	18.2492
ENSG00000170315,13	UBB	protein_coding	1113.17	1238.7	1638.97	1421.42	1429.97	1657.22	1681.74	2515.27	1720.28
ENSG00000109103,11	UNC119	protein_coding	31.5413	32.6732	40.6265	19.0601	22.4005	24.2258	27.0509	20.3116	23.1181
ENSG00000159086,14	PAXBP1	protein_coding	91.3518	98.5087	66.1924	76.7546	77.5288	82.9124	63.8935	53.2134	65.9138
ENSG00000103064,14	SLC7A6	protein_coding	11.0337	11.4091	8.85804	7.25866	7.84703	7.92427	7.75194	5.1493	8.48785
ENSG00000092470,11	WDR76	protein_coding	41.7394	47.8318	39.2704	40.5509	43.3429	42.6268	31.9057	28.7606	36.2304
ENSG00000164070,11	HSPA4L	protein_coding	16.6072	15.6074	10.7927	25.0602	23.4239	23.0791	22.0861	14.5807	21.9002
ENSG00000059122,16	FLYWCH1	protein_coding	16.1539	17.0096	15.7235	20.3489	26.318	36.8811	21.882	19.3922	30.5566
ENSG00000164929,16	BAALC	protein_coding	359.386	327.103	341.556	388.356	376.59	411.443	396.224	360.733	414.995
ENSG00000128309,16	MPST	protein_coding	62.3321	68.4058	72.6874	62.9404	66.693	85.4034	81.4552	102.709	90.954
ENSG00000161013,16	MGAT4B	protein_coding	85.4752	95.2939	91.6564	96.6973	108.256	123.561	108.07	144.394	114.49
ENSG00000206965,1	RNU6-5P	snRNA	177.22	95.5077	150.394	79.6144	11.545	196.483	0	0	19.4251
ENSG00000235272,2	RAMACL	protein_coding	2.52891	3.16967	2.68153	3.40341	3.35106	3.08381	4.45738	4.04117	4.72361
ENSG00000177156,10	TALDO1	protein_coding	90.4698	96.8032	121.386	115.173	117.309	128.383	122.803	149.48	142.849
ENSG00000178568,14	ERBB4	protein_coding	0.29547	0.455655	0.639377	0.151419	0.189682	2.92263	0.056866	0.091802	0
ENSG00000275830,1	AL355974,2	lincRNA	17.3263	18.5551	21.3381	15.7648	12.88	16.806	26.7589	32.9267	26.2615
ENSG00000118523,5	CTGF	protein_coding	14.4276	15.377	17.9554	4.06706	3.3698	4.81486	10.1653	10.8476	8.61907
ENSG00000110583,12	NAA40	protein_coding	32.3249	29.5673	32.3559	32.4298	29.5867	35.8676	25.7391	19.4443	24.4014
ENSG00000164889,13	SLC4A2	protein_coding	151.44	189.415	172.952	167.559	179.383	222.541	179.54	354.237	250.706
ENSG00000117139,17	KDM5B	protein_coding	62.7886	62.2259	38.3999	37.5847	34.1704	34.7686	37.9797	26.9758	42.8176
ENSG00000198879,11	SFMBT2	protein_coding	5.29978	5.59897	3.71361	3.6932	3.84812	4.12756	3.62383	2.62883	3.36107
ENSG00000178921,13	PFAS	protein_coding	56.8743	49.211	25.1273	43.9887	42.8448	42.9406	28.6991	20.4357	29.365
ENSG00000279141,3	LINC01451	lincRNA	0.155634	0.071815	0.143131	0.126331	0.647873	0.401265	0.293054	1.16777	0.473472
ENSG00000164309,14	CMYA5	protein_coding	0.134928	0.223959	0.197584	0.287328	0.460716	0.3487	0.042952	0.062241	0.022647
ENSG00000183580,9	FBXL7	protein_coding	8.3272	9.95189	9.17425	6.23847	5.72988	5.11346	6.83568	4.48045	7.06375
ENSG00000131435,12	PDLIM4	protein_coding	22.099	17.0781	34.4439	26.3026	25.0107	27.2072	41.0155	44.6528	33.3127
ENSG00000136267,13	DGKB	protein_coding	1.46636	1.18954	0.916532	1.01999	0.314367	0.390513	0.522434	0.139789	0.535055
ENSG00000011451,19	WIZ	protein_coding	48.68	49.9734	46.1903	44.1498	45.1405	46.2032	39.7333	23.0932	39.0287
ENSG00000203546,7	AL139353,1	protein_coding	0.128545	0	0.865545	1.65124	0.920555	0.934901	0.802347	3.44305	1.69171
ENSG00000182575,7	NXPH3	protein_coding	1.19171	1.21298	1.10546	1.08521	1.04303	0.675753	0.542321	0.444882	0.590519
ENSG00000176463,13	SLCO3A1	protein_coding	2.54325	1.29024	1.09179	1.41519	1.43547	1.50916	0.374183	0.908444	0.565294
ENSG00000174791,10	RIN1	protein_coding	5.1375	8.5945	6.28029	10.7299	7.66047	12.5935	9.21347	9.67273	12.6276
ENSG00000119326,14	CTNNAL1	protein_coding	58.385	58.6816	55.9882	80.5903	71.6473	72.1884	64.2809	96.3493	76.0297
ENSG00000115310,17	RTN4	protein_coding	259.19	255.475	258.253	272.884	279.115	300.065	293.942	306.159	308.217
ENSG00000244045,12	TMEM199	protein_coding	14.0406	22.5761	21.9525	19.6331	29.3219	28.0809	26.05	32.7782	30.044
ENSG00000100979,14	PLTP	protein_coding	63.4691	64.2135	88.8133	52.7873	60.4594	66.6408	94.9901	97.8957	101.004
ENSG00000160963,13	COL26A1	protein_coding	0.623993	1.02813	0.902251	0.790936	1.15314	0.994865	0.331495	0.316941	0.312674
ENSG00000133250,13	ZNF414	protein_coding	15.5904	18.1967	25.0548	22.9644	26.4772	26.1038	30.7454	33.4921	27.5315
ENSG00000166851,14	PLK1	protein_coding	86.7673	77.3995	95.1156	62.4608	64.3159	73.8662	59.5371	63.601	61.6259
ENSG00000181458,10	TMEM45A	protein_coding	41.4861	38.9368	48.1807	18.624	16.3279	19.6975	28.2598	30.568	29.9062
ENSG00000130827,6	PLXNA3	protein_coding	35.2206	36.3401	43.052	32.0974	40.5594	21.8863	27.2387	19.6385	24.4821
ENSG00000167799,9	NUDT8	protein_coding	11.7266	18.0167	17.722	13.768	18.4877	21.4243	22.8567	35.7429	23.2279
ENSG00000173113,6	TRMT112	protein_coding	149.819	173.572	245.355	164.407	173.793	209.64	236.986	458.426	250.144
ENSG00000148057,15	IDNK	protein_coding	8.7234	6.40158	9.42931	10.9937	11.5097	7.96499	16.0695	13.8433	11.776
ENSG00000197191,4	CYSRT1	protein_coding	1.37802	1.38252	1.48283	2.03028	1.72618	1.27852	2.68389	3.61025	3.208
ENSG00000196376,10	SLC35F1	protein_coding	46.0926	43.508	32.3147	25.9717	26.0865	23.606	30.8579	19.6795	32.5476
ENSG00000277972,1	CISD3	protein_coding	10.7237	9.98428	14.4761	13.7729	14.5311	16.7559	15.6777	18.6393	19.0718
ENSG00000189180,15	ZNF33A	protein_coding	12.217	7.51361	7.58987	8.76822	7.56857	7.73057	6.66997	3.53152	6.25566
ENSG00000114796,15	KLHL24	protein_coding	17.1823	15.8091	10.382	10.5377	11.1733	11.1005	8.73848	5.53999	12.0853
ENSG00000185875,12	THNSL1	protein_coding	13.3034	12.3663	11.6027	16.18	15.141	14.8321	16.4141	12.6435	17.1543
ENSG00000104419,14	NDRG1	protein_coding	89.1571	88.0945	78.6629	69.4599	73.6715	71.5042	108.519	82.7791	110.625
ENSG00000163320,10	CGGBP1	protein_coding	113.427	105.987	93.689	106.509	109.854	102.217	87.246	72.4952	81.5203
ENSG00000159720,11	ATP6V0D1	protein_coding	42.8347	42.8174	48.0969	44.472	40.7235	45.944	50.0522	77.8094	60.7495
ENSG00000138316,10	ADAMTS14	protein_coding	2.35869	2.46917	1.97605	1.81676	1.91014	3.1638	1.48018	1.0827	1.28502
ENSG00000265241,6	RBM8A	protein_coding	203.861	235.919	303.396	266.058	278.839	295.296	324.9	420.938	311.044
ENSG00000175573,6	C11orf68	protein_coding	27.0318	25.0055	33.6346	23.3386	30.223	32.246	40.1224	39.5798	38.4149
ENSG00000184863,10	RBM33	protein_coding	41.7516	43.6116	25.8722	27.9332	31.2556	33.9927	26.1148	18.5638	28.4369
ENSG00000151006,7	PRSS53	protein_coding	2.28444	2.56601	2.59792	1.51877	1.38529	0.658612	1.73396	0.845601	0.997707
ENSG00000076053,10	RBM7	protein_coding	18.0236	15.3547	16.71	15.32	17.5595	15.9032	9.0437	8.83199	14.7225
ENSG00000028137,18	TNFRSF1B	protein_coding	1.39436	1.32494	1.39726	1.58428	1.92625	2.64771	1.81865	2.12081	3.44121
ENSG00000171552,12	BCL2L1	protein_coding	57.7911	60.8713	52.4015	64.1601	68.6033	76.4244	68.1419	61.2766	72.4016
ENSG00000224081,8	SLC44A3-AS1	transcribed_processed_pseudogene	0.618721	0.533719	0.848521	1.21891	1.2526	1.06502	6.00033	1.20083	1.04131
ENSG00000106123,11	EPHB6	protein_coding	0	0	0	0.262213	0.152662	0.337233	0.089043	0.333917	0.118879
ENSG00000177946,6	CENPBD1	protein_coding	7.96374	6.71993	6.56529	8.48493	11.7335	9.6913	10.0789	8.00387	11.2192
ENSG00000073578,16	SDHA	protein_coding	84.2514	93.5817	88.653	94.7889	103.465	103.355	104.984	115.5	106.867
ENSG00000232112,3	TMA7	protein_coding	405.102	422.721	616.517	436.284	471.022	528.472	627.757	988.069	612.149
ENSG00000183091,19	NEB	protein_coding	0.388517	0.371649	0.807801	0.78718	0.635357	0.567843	0.162035	0.237387	0.254986
ENSG00000156381,8	ANKRD9	protein_coding	33.8842	35.0403	29.1349	29.235	30.1685	36.3126	38.1386	46.168	41.6928
ENSG00000088179,8	PTPN4	protein_coding	28.7703	22.325	17.5785	10.1399	24.9542	19.2227	12.3889	9.83856	15.6858
ENSG00000116560,10	SFPQ	protein_coding	380.171	361.442	379.962	281.907	278.222	266.756	306.248	270.33	314.151
ENSG00000111077,17	TNS2	protein_coding	42.869	45.9404	37.863	22.3993	26.8418	33.5298	33.7871	19.8386	30.7516
ENSG00000130150,11	MOSPD2	protein_coding	10.8681	12.4564	7.0656	8.31319	6.54662	6.841	6.2146	5.5481	6.97581
ENSG00000115944,14	COX7A2L	protein_coding	98.1757	85.7024	105.446	90.223	86.7309	94.6779	114.037	146.738	123.972
ENSG00000136522,13	MRPL47	protein_coding	59.533	67.9531	81.4237	75.9174	89.8332	90.0975	88.368	118.53	90.2656
ENSG00000178096,8	BOLA1	protein_coding	14.1587	01,11,6354	16.9316	14.7268	16.8366	17.0396	20.5561	27.5483	20.0764
ENSG00000112186,11	CAP2	protein_coding	58.3701	54.4479	60.5683	43.2606	45.6879	47.7741	49.2395	36.8876	44.6401
ENSG00000227775,3	AL031282,1	transcribed_processed_pseudogene	0.155844	0.216123	0.071769	1.84	0.963787	1.87716	1.67432	1.79615	0.060292
ENSG00000078487,17	ZCWPW1	protein_coding	2.98319	3.37617	3.43755	3.46138	4.13252	6.87476	4.85952	7.7574	5.31873
ENSG00000130810,19	PPAN	protein_coding	61.264	65.3325	52.1415	42.0153	52.935	52.384	40.5825	36.7053	49.505
ENSG00000162604,12	TM2D1	protein_coding	34.8429	31.8077	49.4486	39.6676	40.0881	37.274	50.2402	70.0918	55.5415
ENSG00000106305,9	AIMP2	protein_coding	80.3561	87.4006	105.592	100.365	115.608	105.398	109.963	165.497	118.546
ENSG00000266208,1	AC080112,1	antisense	2.50955	2.80707	2.06714	2.13658	2.97005	3.11773	4.08021	3.74968	4.08407
ENSG00000168066,20	SF1	protein_coding	290.587	291.356	296.594	269.988	321.751	270.259	245.664	146.32	227.496
ENSG00000001631,15	KRIT1	protein_coding	60.2431	66.053	53.2986	59.5573	61.8378	62.3911	47.2117	33.8797	51.0953
ENSG00000136379,11	ABHD17C	protein_coding	111.111	102.656	116.19	105.96	105.455	101.91	132.982	125.896	133.072
ENSG00000149633,11	KIAA1755	protein_coding	25.6449	12.1717	10.3211	11.388	8.90078	11.0292	4.07986	10.5856	5.66358
ENSG00000189057,10	FAM111B	protein_coding	32.5337	29.4775	23.3362	29.9035	28.7257	26.9262	19.8534	11.8209	23.946
ENSG00000239672,7	NME1	protein_coding	321.999	330.516	461.251	391.389	447.806	442.618	449.092	629.89	506.437
ENSG00000153904,19	DDAH1	protein_coding	69.4048	62.8977	55.108	56.2339	53.0833	54.0361	51.5397	34.2258	51.015
ENSG00000165060,12	FXN	protein_coding	20.0671	19.7426	28.4309	24.9731	24.0789	27.2148	29.1507	42.5654	32.1785
ENSG00000153253,16	SCN3A	protein_coding	4.20906	5.59431	1.29836	1.92664	2.15901	1.19079	1.26903	0.737324	2.34207
ENSG00000269929,1	AL158152,1	lincRNA	3.86878	5.37107	3.28498	4.17987	3.51735	2.26837	1.91861	1.89948	1.97307
ENSG00000101188,4	NTSR1	protein_coding	3.51327	5.4213	4.2309	3.95857	3.45079	4.20869	6.85539	5.52281	6.39864
ENSG00000144040,12	SFXN5	protein_coding	24.9605	21.7622	19.174	28.4104	28.7564	34.735	28.6244	24.0056	28.6736
ENSG00000139496,15	NUP58	protein_coding	43.7852	42.0085	33.7342	39.1978	38.1309	34.5111	33.0149	22.7938	30.2297
ENSG00000140961,12	OSGIN1	protein_coding	1.07922	0.598496	0.993771	7.11283	01,06,3352	01,07,8666	1.40955	1.68346	2.17192
ENSG00000109919,9	MTCH2	protein_coding	126.003	143.008	184.764	156.161	151.148	180.338	183.848	338.476	192.597
ENSG00000147853,16	AK3	protein_coding	28.2331	30.6694	29.2227	31.0224	33.8535	35.726	34.1944	32.3984	39.1405
ENSG00000237298,9	TTN-AS1	antisense	0	0	0	0.069066	0.257014	0	0.275065	0.332733	0.607041
ENSG00000123836,14	PFKFB2	protein_coding	2.9351	2.00579	0.707797	0.835667	0.775473	1.11316	0.44296	0.745986	0.928255
ENSG00000122687,17	MRM2	protein_coding	59.6789	60.1622	73.587	83.3816	82.4257	87.2234	82.5253	78.346	81.5825
ENSG00000153029,14	MR1	protein_coding	0.588521	0.786545	0.77045	0.833628	0.55414	1.04614	1.61725	0.915354	2.30609
ENSG00000132122,11	SPATA6	protein_coding	101.16	90.2104	90.8363	66.4351	66.5983	65.9022	77.3229	58.4274	81.5778
ENSG00000225210,10	DUXAP9	transcribed_processed_pseudogene	48.4549	43.5241	41.6583	40.0155	39.0294	41.2474	31.006	26.9325	38.8558
ENSG00000184564,9	SLITRK6	protein_coding	1.32544	0.812823	0.582921	0.503193	0.277955	0.463708	0.286642	0.291113	0.366417
ENSG00000108799,12	EZH1	protein_coding	21.4128	22.3589	22.3069	21.344	18.7967	18.4443	18.0164	13.4174	16.8305
ENSG00000237819,5	AC002454,1	antisense	37.5496	49.4061	63.4206	33.8911	47.7093	43.9791	74.4613	112.066	71.44
ENSG00000104953,19	TLE6	protein_coding	11.9184	12.2736	15.6357	3.96326	6.0225	8.67924	19.2012	24.158	23.6456
ENSG00000223509,8	AC135983,2	transcribed_processed_pseudogene	11.4967	10.5867	10.9768	9.0854	7.98849	7.50084	6.90207	6.64934	6.66496
ENSG00000180626,9	ZNF594	protein_coding	9.41931	8.29215	6.05117	9.31031	10.3634	10.1035	6.14025	3.16848	5.42202
ENSG00000135940,6	COX5B	protein_coding	148.951	157.231	244.774	157.491	170.14	196.111	247.145	338.486	248.884
ENSG00000176087,14	SLC35A4	protein_coding	52.6802	63.3682	62.7497	83.6017	86.9533	93.7266	71.1508	67.1988	80.7791
ENSG00000164796,17	CSMD3	protein_coding	0.082153	0.075723	0.041745	0.047804	0.01754	0.080791	0.113966	0.648584	0.131065
ENSG00000185000,11	DGAT1	protein_coding	16.0212	17.6525	19.9372	14.7396	16.7785	18.4258	29.771	20.77	23.0569
ENSG00000082898,16	XPO1	protein_coding	197.304	203.375	171.538	202.227	197.143	179.635	158.433	114.819	157.682
ENSG00000107077,18	KDM4C	protein_coding	3.44555	5.02068	3.33814	2.0463	1.8614	0.977621	2.37263	1.54156	2.26362
ENSG00000238227,7	TMEM250	protein_coding	36.2784	38.2719	34.324	38.399	45.7322	53.1855	45.3206	42.5882	46.8889
ENSG00000169679,14	BUB1	protein_coding	66.2991	67.6668	62.9293	70.0124	63.8401	61.2355	52.703	42.048	56.1895
ENSG00000185630,18	PBX1	protein_coding	13.7732	9.1812	6.88039	8.04834	6.51797	5.23957	6.87365	3.99346	6.27319
ENSG00000188483,7	IER5L	protein_coding	26.1888	23.0339	22.1289	26.3433	28.283	28.4296	28.2255	29.9277	29.1193
ENSG00000270617,1	URGCP-MRPS24	protein_coding	0.471004	2.26576	2.08462	2.90075	2.91729	2.89144	2.35972	5.31295	7.2821
ENSG00000109689,15	STIM2	protein_coding	38.1248	34.6343	31.0958	28.9019	28.7683	25.4313	28.7511	15.8147	25.5213
ENSG00000225630,1	MTND2P28	unprocessed_pseudogene	9.61412	6.49364	21.3698	7.28234	7.32742	4.48024	7.06625	2.24365	5.37752
ENSG00000166086,12	JAM3	protein_coding	192.608	178.605	139.245	153.936	155.752	167.721	133.474	107.947	139.901
ENSG00000167508,11	MVD	protein_coding	116.946	102.474	100.517	46.127	55.6709	78.02	72.7455	71.6813	68.1455
ENSG00000139624,12	CERS5	protein_coding	44.9675	49.7989	55.4355	57.9922	54.5012	53.258	55.4719	68.6416	73.2788
ENSG00000116221,15	MRPL37	protein_coding	83.5771	86.9613	86.3235	99.8757	104.199	104.665	99.5542	96.5961	104.29
ENSG00000087301,8	TXNDC16	protein_coding	7.57593	7.28671	7.55025	5.16687	6.45202	5.67984	5.97609	4.30595	5.27279
ENSG00000143569,18	UBAP2L	protein_coding	155.334	141.904	125.227	163.602	162.698	136.45	118.782	72.8797	105.144
ENSG00000169692,12	AGPAT2	protein_coding	31.9599	34.6492	36.2625	31.043	35.0926	36.2945	41.9873	45.0279	43.7538
ENSG00000114857,17	NKTR	protein_coding	37.5844	45.9628	26.9262	38.9039	36.5607	32.6586	26.6434	13.398	27.7617
ENSG00000270866,1	AC067773,1	lincRNA	3.21657	3.01669	4.04214	0.566413	01,01,2777	1.20998	1.38688	0.962952	1.62113
ENSG00000164197,11	RNF180	protein_coding	7.01018	6.82415	3.8367	4.53616	5.14526	4.47157	4.24762	1.80525	3.60157
ENSG00000139289,13	PHLDA1	protein_coding	123.514	116.446	104.019	155.657	154.544	152.53	136.435	115.051	140.443
ENSG00000162148,10	PPP1R32	protein_coding	3.72611	2.60335	2.37471	1.10884	1.72101	0.825958	0.712606	1.16782	0.543771
ENSG00000164181,13	ELOVL7	protein_coding	0.516599	0.683127	0.157815	0.083641	0.663864	0.412167	0.077558	0	0.052938
ENSG00000168477,19	TNXB	protein_coding	0.048092	0.062054	0.125022	0.120087	0.730493	0.338409	0.148588	0.158196	1.19007
ENSG00000203999,8	LINC01270	lincRNA	2.27869	0.879881	2.15929	1.7714	2.33025	3.06714	3.62412	3.9103	3.38582
ENSG00000132199,19	ENOSF1	protein_coding	20.6874	23.2391	23.6191	16.9429	19.9779	19.7178	16.4032	14.5344	17.4849
ENSG00000160961,11	ZNF333	protein_coding	17.688	15.8006	13.9728	12.3638	14.5749	13.0984	11.5329	10.6153	11.7546
ENSG00000174547,13	MRPL11	protein_coding	58.6559	58.5986	72.7795	62.9148	63.7865	77.6016	82.3103	102.681	79.2636
ENSG00000196656,7	AC004057,1	transcribed_processed_pseudogene	479.317	522.882	734.572	567.948	555.672	691.553	754.164	1102.32	752.296
ENSG00000256235,2	SMIM3	protein_coding	55.2777	53.1454	74.3011	41.1106	45.0247	47.1467	73.8014	95.9926	83.5131
ENSG00000164855,15	TMEM184A	protein_coding	0	0	0.021709	0.038267	0.092563	0.040545	0.525536	0.159431	0.21594
ENSG00000227053,1	AC105446,1	antisense	4.94776	4.17048	8.96088	7.78376	9.124	11.9437	11.4321	26.2092	13.9831
ENSG00000272031,2	ANKRD34A	protein_coding	3.46656	3.42684	3.46656	1.74812	1.7749	2.35229	2.06123	1.62863	2.58909
ENSG00000141934,9	PLPP2	protein_coding	2.87785	1.77949	2.79541	1.31804	0.759452	1.18457	4.5944	4.711	5.25373
ENSG00000148229,12	POLE3	protein_coding	94.6771	96.8118	108.062	119.408	122.058	124.961	110.81	125.656	133.294
ENSG00000156687,10	UNC5D	protein_coding	23.1211	20.3595	10.7442	11.2074	11.112	11.3806	12.8697	5.97094	12.1573
ENSG00000116833,13	NR5A2	protein_coding	0.712542	0.975957	0.681438	0.697987	0.547893	0.623853	0.286611	0.27168	0.451013
ENSG00000183978,7	COA3	protein_coding	85.6741	102.916	148.943	97.7999	108.269	113.488	150.54	203.857	154.696
ENSG00000185339,8	TCN2	protein_coding	2.98313	3.68458	3.86866	4.56725	4.40177	6.39791	5.88807	5.57313	5.09708
ENSG00000151229,12	SLC2A13	protein_coding	7.20211	6.28297	4.32786	3.60435	3.78546	3.38943	4.38377	2.97497	4.06144
ENSG00000182004,12	SNRPE	protein_coding	192.411	214.266	348.19	288.779	275.875	324.621	326.466	576.033	336.907
ENSG00000163513,17	TGFBR2	protein_coding	12.4232	12.6554	11.3388	11.7099	9.75127	10.5141	9.12476	7.26755	10.195
ENSG00000105792,19	CFAP69	protein_coding	0.134509	0.993561	0.90913	0.469872	0.47187	1.51943	0.100145	0.169042	0.188542
ENSG00000211450,9	SELENOH	protein_coding	132.246	152.838	203.415	152.271	157.969	184.936	215.303	348.207	197.596
ENSG00000143226,13	FCGR2A	protein_coding	47.4522	48.0386	69.8152	22.8943	22.2533	20.3927	40.4032	31.9351	35.6139
ENSG00000170689,9	HOXB9	protein_coding	92.1168	80.0784	87.3653	80.2469	82.3058	81.2793	104.702	86.2116	116.192
ENSG00000167740,9	CYB5D2	protein_coding	25.1122	27.8836	27.3086	25.6133	31.7399	25.822	35.5009	35.0823	33.4208
ENSG00000169964,7	TMEM42	protein_coding	12.2439	12.0044	13.6198	8.54006	11.9009	13.3394	14.5803	26.3003	19.8023
ENSG00000270011,7	ZNF559-ZNF177	protein_coding	3.48648	6.44856	4.94625	4.22487	4.21191	3.82806	0.570474	2.76494	1.74291
ENSG00000198513,11	ATL1	protein_coding	9.83163	8.97577	9.85388	14.8133	12.5636	14.2544	14.1166	9.66352	14.6232
ENSG00000130066,16	SAT1	protein_coding	86.8618	104.05	134.975	79.0126	83.0265	85.1362	138.257	185.13	143.917
ENSG00000158669,11	GPAT4	protein_coding	195.538	211.318	167.555	170.033	152.371	155.235	151.635	98.3169	160.918
ENSG00000156858,11	PRR14	protein_coding	39.8627	39.508	55.5042	48.6289	45.9081	50.7201	51.8349	84.3411	63.5004
ENSG00000137880,5	GCHFR	protein_coding	1.01405	1.0315	0.615788	1.22989	1.84355	1.25136	3.34727	2.14475	2.94912
ENSG00000095574,11	IKZF5	protein_coding	11.5122	9.96844	11.2911	10.8443	10.4776	8.55319	8.61973	5.56405	8.05894
ENSG00000177576,11	C18orf32	protein_coding	29.6731	31.0591	42.8003	20.6076	30.3696	30.456	56.7609	64.2015	39.9902
ENSG00000010256,10	UQCRC1	protein_coding	202.604	247.794	220.929	234.842	243.742	270.05	264.674	274.584	277.596
ENSG00000086475,14	SEPHS1	protein_coding	112.939	105.128	103.978	115.577	99.6474	110.364	87.5696	60.6876	91.3173
ENSG00000213397,10	HAUS7	protein_coding	21.6754	18.0852	20.1783	25.5724	21.9188	25.1484	28.0066	25.5699	25.5197
ENSG00000152253,8	SPC25	protein_coding	51.8606	56.1257	69.2008	73.9865	72.0818	83.9669	71.2929	133.396	73.8356
ENSG00000140937,13	CDH11	protein_coding	5.37806	4.94738	2.93298	5.00178	2.63872	2.36984	2.13073	1.46151	2.78196
ENSG00000171208,9	NETO2	protein_coding	146.207	141.27	148.191	149.986	130.477	129.502	108.557	91.7574	128.801
ENSG00000174276,6	ZNHIT2	protein_coding	6.26365	7.48788	5.93456	7.5197	7.53196	9.18572	8.24253	10.9642	10.5157
ENSG00000203875,11	SNHG5	processed_transcript	248.955	317.544	430.818	274.765	312.771	326.661	420.308	723.429	440.152
ENSG00000123243,14	ITIH5	protein_coding	0.743768	0.817965	0.902205	0.348204	0.689488	0.750088	0.413041	0.187631	0.438548
ENSG00000121864,9	ZNF639	protein_coding	54.5242	56.0923	48.7491	51.2153	50.068	52.0269	42.5359	35.2312	45.1596
ENSG00000136783,9	NIPSNAP3A	protein_coding	9.10634	9.31767	10.1279	12.183	10.5482	11.6771	14.129	13.9092	11.7698
ENSG00000166311,9	SMPD1	protein_coding	27.0284	27.4973	31.2925	26.8198	33.9103	34.4398	34.734	48.3727	36.5772
ENSG00000137802,13	MAPKBP1	protein_coding	10.059	12.9811	9.15478	10.5859	12.9244	11.8187	8.78248	4.88313	7.38
ENSG00000119471,14	HSDL2	protein_coding	40.2761	41.7751	34.2436	45.7728	40.397	40.6076	49.163	39.5671	52.3723
ENSG00000011243,17	AKAP8L	protein_coding	91.7563	79.199	86.9846	56.0598	54.1311	64.8766	64.3938	49.9735	75.4197
ENSG00000100271,16	TTLL1	protein_coding	14.223	15.6341	17.7503	15.8745	15.0186	18.2337	21.5718	23.1553	20.1969
ENSG00000002330,13	BAD	protein_coding	49.663	55.3905	61.5599	51.5988	52.9798	62.4843	68.3983	81.8099	72.8979
ENSG00000106004,4	HOXA5	protein_coding	7.49072	13.317	9.51916	12.1577	10.6604	11.8876	13.3023	12.7728	21.8168
ENSG00000137497,17	NUMA1	protein_coding	129.43	132.13	92.575	103.462	101.925	111.027	87.6385	66.8341	100.104
ENSG00000125347,13	IRF1	protein_coding	3.77599	5.70145	5.02019	9.3467	12.9062	11.2508	6.06325	7.28001	9.06062
ENSG00000115295,19	CLIP4	protein_coding	10.0158	10.0146	9.86103	10.1901	9.07819	7.64968	6.01108	5.87351	8.19266
ENSG00000106245,10	BUD31	protein_coding	261.335	316.557	421.9	421.371	412.55	460.981	399.513	664.674	446.727
ENSG00000138767,13	CNOT6L	protein_coding	10.0025	8.53515	4.90556	12.6441	8.71507	8.81651	4.79927	3.06087	5.62404
ENSG00000165406,15	MARCH8	protein_coding	9.86777	9.63778	7.74401	10.3707	10.493	10.5591	12.8004	9.51407	11.6895
ENSG00000011405,13	PIK3C2A	protein_coding	29.0171	23.0445	16.4738	23.7218	24.0471	21.3349	18.1492	9.53504	15.6239
ENSG00000136247,14	ZDHHC4	protein_coding	78.922	78.8034	107.57	85.7902	91.6255	105.633	106.719	136.141	122.055
ENSG00000147123,10	NDUFB11	protein_coding	79.122	94.0279	138.778	97.7063	100.664	113.33	134.402	225.791	135.196
ENSG00000125629,14	INSIG2	protein_coding	60.5253	73.6021	75.9204	36.0988	28.15	45.575	38.5772	47.6256	50.1502
ENSG00000170385,9	SLC30A1	protein_coding	9.56911	9.19445	6.09816	14.3588	14.2231	14.027	11.1639	9.84152	11.2041
ENSG00000090013,10	BLVRB	protein_coding	11.3696	15.5034	20.9558	13.2193	11.2614	13.4148	23.5194	25.6621	27.2196
ENSG00000153012,11	LGI2	protein_coding	105.891	96.908	83.7913	93.6524	82.7156	90.2902	83.7386	54.2105	70.417
ENSG00000185697,16	MYBL1	protein_coding	11.0037	10.6737	7.58538	9.98637	8.44466	8.67369	7.19494	4.73665	7.42434
ENSG00000102763,17	VWA8	protein_coding	6.11435	8.30833	4.81446	5.47722	4.38274	5.28585	4.23874	3.72202	4.44702
ENSG00000166925,8	TSC22D4	protein_coding	242.325	259.645	302.195	163.664	179.043	234.356	337.889	441.926	333.86
ENSG00000125868,15	DSTN	protein_coding	166.336	170.62	210.823	223.365	218.286	224.381	216.954	253.482	234.034
ENSG00000124785,8	NRN1	protein_coding	119.021	111.009	146.084	57.3544	62.446	60.9645	83.7504	91.9536	88.9364
ENSG00000105655,18	ISYNA1	protein_coding	47.1878	60.0535	57.1764	41.9342	41.5186	47.1501	69.668	60.5379	75.3825
ENSG00000151023,16	ENKUR	protein_coding	26.6277	24.9362	32.2251	24.9034	23.2843	27.0383	35.2354	38.6013	37.0325
ENSG00000189060,5	H1F0	protein_coding	111.478	101.088	136.681	81.4816	90.8134	92.969	81.6142	83.3005	82.8357
ENSG00000271270,6	TMCC1-AS1	antisense	12.3836	9.52328	9.30865	10.1854	10.197	9.48076	6.79106	6.72448	6.60225
ENSG00000282393,1	AC016588,2	lincRNA	5.5247	6.11984	4.85834	8.42499	9.1985	6.79755	8.85563	6.2754	7.74233
ENSG00000182263,13	FIGN	protein_coding	8.70154	9.92944	4.2617	5.98792	5.30246	4.404	5.13418	2.49697	01,04,9384
ENSG00000272831,1	AC027644,3	antisense	36.0548	35.5168	51.6313	39.1918	38.8566	36.4788	55.1587	72.2492	59.6991
ENSG00000229644,6	NAMPTP1	processed_pseudogene	4.19386	3.61814	4.39386	2.63697	2.62484	2.834	2.84556	2.2327	2.14717
ENSG00000137275,13	RIPK1	protein_coding	11.3763	12.4116	10.8431	17.6426	15.1304	15.7696	15.1596	12.2023	15.2532
ENSG00000126500,3	FLRT1	protein_coding	1.8782	1.95948	1.20492	1.17988	1.06148	1.10386	1.03602	0.546181	0.939343
ENSG00000153814,12	JAZF1	protein_coding	13.222	14.4658	13.347	5.36682	5.80607	8.60477	9.23383	7.68742	01,10,5419
ENSG00000244486,8	SCARF2	protein_coding	50.3415	49.2217	46.0273	47.267	47.1945	59.4868	56.0565	57.7838	61.9138
ENSG00000156869,13	FRRS1	protein_coding	2.41851	3.13021	2.08682	1.66899	1.55751	1.27485	1.43183	0.869749	1.33072
ENSG00000119013,8	NDUFB3	protein_coding	85.4173	101.644	140.793	111.946	87.6233	110.438	129.133	258.434	152.318
ENSG00000104626,14	ERI1	protein_coding	20.491	19.2838	15.615	27.832	27.4826	27.6722	23.3358	20.2398	22.8881
ENSG00000175567,8	UCP2	protein_coding	47.1555	56.9507	67.521	66.4598	66.0075	80.5431	75.0319	86.4702	73.7955
ENSG00000242485,5	MRPL20	protein_coding	128.605	121.335	195.959	143.583	160.051	172.794	189.946	270.775	203.239
ENSG00000147416,10	ATP6V1B2	protein_coding	70.004	73.3703	77.5479	89.6711	85.4711	95.1453	80.3226	93.9291	97.7201
ENSG00000099953,9	MMP11	protein_coding	8.61317	11.9829	12.479	8.59688	8.01514	11.6448	15.749	15.4628	15.9123
ENSG00000197056,10	ZMYM1	protein_coding	13.2796	17.87	13.6023	13.582	15.5094	13.2061	11.5962	7.05989	11.3144
ENSG00000143420,18	ENSA	protein_coding	118.988	124.106	151.707	135.614	143.332	157.151	157.505	182.075	169.213
ENSG00000137414,5	FAM8A1	protein_coding	16.8361	14.3509	14.698	13.98	13.7148	13.3539	11.7165	9.08024	13.254
ENSG00000203814,6	HIST2H2BF	protein_coding	4.85138	8.97934	2.27059	11.0514	7.45025	8.26101	3.27448	1.336	1.73354
ENSG00000165458,13	INPPL1	protein_coding	135.751	139.064	115.31	120.711	106.959	132.485	103.782	72.5302	110.386
ENSG00000213462,4	ERV3-1	protein_coding	21.5354	19.6982	18.1012	15.0888	16.3337	14.1798	16.3065	10.1389	14.3419
ENSG00000198888,2	MT-ND1	protein_coding	1229.92	1001.32	2859.4	1097.36	1259.91	977.927	988.85	831.945	914.589
ENSG00000113312,10	TTC1	protein_coding	51.4243	56.058	57.6245	62.9145	65.5957	63.6466	66.1652	64.8387	68.1653
ENSG00000143842,14	SOX13	protein_coding	24.7361	29.2326	24.0934	19.4794	22.4832	28.2338	19.3545	16.3343	19.6741
ENSG00000279207,1	AC015813,6	TEC	5.67319	6.51914	5.43814	8.49142	8.26855	8.84396	4.40557	3.12842	4.96796
ENSG00000122515,14	ZMIZ2	protein_coding	74.5305	72.083	67.2335	56.2256	55.1279	59.1016	58.1788	38.8602	61.9964
ENSG00000107021,15	TBC1D13	protein_coding	16.7389	18.4352	18.0526	23.7766	21.846	25.7121	21.5914	21.9179	21.6611
ENSG00000138363,14	ATIC	protein_coding	115.423	129.731	167.195	153.379	151.429	153.345	167.31	220.752	179.812
ENSG00000159055,3	MIS18A	protein_coding	47.6071	44.2035	48.3405	55.0685	55.6918	57.5962	55.3011	51.8702	59.2
ENSG00000268061,5	NAPA-AS1	antisense	3.18363	2.5375	3.28785	1.82439	3.88085	2.63091	5.53634	9.09283	3.94217
ENSG00000146574,15	CCZ1B	protein_coding	50.2735	53.4157	58.1133	87.6471	42.5445	83.2615	58.6866	117.461	91.8421
ENSG00000185246,17	PRPF39	protein_coding	32.4504	36.0534	40.6303	31.7445	29.7142	36.9126	24.0707	26.8084	25.3278
ENSG00000149932,16	TMEM219	protein_coding	40.5338	46.4079	74.3975	43.9419	44.6266	49.7757	69.6834	113.948	75.4634
ENSG00000197959,13	DNM3	protein_coding	2.58563	1.53035	1.96166	0.642021	0.52838	0.988041	1.27819	0.698743	1.00066
ENSG00000198618,5	PPIAP22	processed_pseudogene	8.05686	20.5732	16.4418	35.8616	13.9963	20.6879	20.8175	72.2604	22.1887
ENSG00000185158,12	LRRC37B	protein_coding	19.138	13.7654	15.8006	22.132	15.6902	20.0251	12.1303	7.66197	11.2688
ENSG00000198727,2	MT-CYB	protein_coding	2594.51	2002.09	5610.66	1742.8	2006.88	1430.51	1776.05	976.003	1532.39
ENSG00000182752,9	PAPPA	protein_coding	4.85389	4.59228	2.25153	6.74252	6.09323	4.89266	7.10303	3.85774	8.09608
ENSG00000110628,14	SLC22A18	protein_coding	4.60485	6.72378	6.83677	4.94695	5.04576	7.52625	7.27292	12.1588	11.5573
ENSG00000156170,12	NDUFAF6	protein_coding	21.2418	17.7828	20.2581	23.598	24.5843	25.6289	24.5869	24.7351	27.6516
ENSG00000144589,21	STK11IP	protein_coding	23.4144	33.0615	32.107	17.4727	14.3339	19.3655	19.3418	20.629	15.1946
ENSG00000002586,19	CD99	protein_coding	131.045	150.028	191.333	152.185	169.157	187.234	194.298	271.704	203.065
ENSG00000102780,16	DGKH	protein_coding	3.35422	4.44796	1.96475	4.69986	3.7895	3.58976	2.12605	1.48872	2.12003
ENSG00000167325,14	RRM1	protein_coding	152.987	147.281	154.154	201.485	200.36	204.434	163.559	184.971	192.013
ENSG00000164692,17	COL1A2	protein_coding	5.03105	9.16375	0.43955	0.582074	0.643883	1.06683	0.664668	0.405228	1.44594
ENSG00000165280,15	VCP	protein_coding	126.162	129.218	104.55	133.963	149.868	150.172	140.218	123.267	160.345
ENSG00000164031,16	DNAJB14	protein_coding	26.6147	29.8609	15.4335	24.8201	25.6703	19.8556	15.6131	10.9758	17.9649
ENSG00000107651,12	SEC23IP	protein_coding	36.6682	30.1283	30.3172	33.2941	35.3713	36.4657	19.8105	22.62	27.6236
ENSG00000145050,16	MANF	protein_coding	237.489	259.807	316.719	218.36	196.128	239.293	325.05	513.927	339.015
ENSG00000132383,11	RPA1	protein_coding	92.7076	81.8607	84.3263	102.183	101.436	128.657	104.889	95.8005	108.227
ENSG00000174672,15	BRSK2	protein_coding	28.946	30.3441	22.2384	20.0044	19.133	20.6503	20.5731	15.1653	22.4293
ENSG00000102755,11	FLT1	protein_coding	0.937765	0.713887	0.402006	0.51644	0.295586	0.528222	0.297194	0.168167	0.351846
ENSG00000204262,12	COL5A2	protein_coding	1.62067	0.952711	0.635451	0.285835	1.307	0.213285	0.40539	0.218817	0.319718
ENSG00000139146,13	SINHCAF	protein_coding	37.0637	36.6996	36.83	46.5322	46.1848	62.9367	43.7332	55.0107	46.6243
ENSG00000166189,7	HPS6	protein_coding	12.6895	13.9761	10.808	14.1249	14.7704	17.8595	15.8934	16.2248	15.8572
ENSG00000090971,4	NAT14	protein_coding	34.6848	41.3034	61.9051	39.0603	43.4298	64.4251	55.2305	113.15	68.3382
ENSG00000133983,14	COX16	protein_coding	39.3119	36.1258	55.9683	37.9862	44.8528	45.9026	53.2737	86.3343	60.4008
ENSG00000162976,12	PQLC3	protein_coding	10.0494	10.5712	15.0433	14.0401	11.8491	14.276	18.6617	22.2466	14.4292
ENSG00000137216,18	TMEM63B	protein_coding	29.1756	29.2912	25.0285	24.8608	30.9278	33.198	39.8049	26.2503	44.7184
ENSG00000130758,7	MAP3K10	protein_coding	14.0274	15.852	13.1016	11.1305	10.8287	12.3382	9.91192	8.17589	12.2977
ENSG00000111775,2	COX6A1	protein_coding	458.311	494.999	730.569	523.951	553.747	602.919	705.934	1080.61	722.996
ENSG00000103266,10	STUB1	protein_coding	89.1469	91.5657	131.851	106.849	89.0694	131.88	128.386	208.36	140.202
ENSG00000006459,10	KDM7A	protein_coding	6.19126	3.53144	2.29636	2.46266	4.18201	2.83712	01,02,2767	1.61108	2.43212
ENSG00000109920,12	FNBP4	protein_coding	69.8687	67.8163	58.4416	60.428	54.63	68.6266	50.0465	35.7477	56.6847
ENSG00000127540,11	UQCR11	protein_coding	140.872	143.425	234.162	144.386	162.458	173.187	232.064	337.08	222.173
ENSG00000166689,15	PLEKHA7	protein_coding	6.27929	4.44003	2.67345	3.05876	2.15057	2.30477	2.45126	1.81559	2.78607
ENSG00000125991,19	ERGIC3	protein_coding	157.45	188.378	229.011	173.728	173.324	211.833	236.708	295.792	251.098
ENSG00000164405,10	UQCRQ	protein_coding	237.073	269.958	419.068	303.049	296.602	336.867	389.401	603.25	424.251
ENSG00000069812,11	HES2	protein_coding	0	0.02826	0.028164	0	0.091665	0	0.253774	0.282989	0.259031
ENSG00000133028,11	SCO1	protein_coding	17.7735	17.3663	20.9228	22.787	22.6968	24.3343	23.7761	26.4053	22.4725
ENSG00000087087,19	SRRT	protein_coding	216.691	190.406	220.901	190.611	192.78	204.79	156.587	154.335	174.284
ENSG00000272655,2	POLR2J4	transcribed_unprocessed_pseudogene	37.4396	21.9894	40.6952	25.5264	23.568	12.1729	24.2525	12.1086	12.8746
ENSG00000099330,8	OCEL1	protein_coding	5.33111	5.77623	8.58042	5.53699	5.15117	8.30473	9.62464	16.7413	10.4741
ENSG00000131944,9	FAAP24	protein_coding	3.20008	4.55996	5.33326	9.33015	8.66787	8.08925	5.56447	6.58505	10.173
ENSG00000182180,13	MRPS16	protein_coding	55.321	48.9491	66.3301	68.5874	58.3128	75.8929	72.2807	77.6067	74.1331
ENSG00000184304,14	PRKD1	protein_coding	27.569	27.4472	25.2551	18.2417	15.492	15.4439	21.3735	16.7499	22.0253
ENSG00000262633,2	AC005670,2	protein_coding	3.84519	0.317879	0.415092	1.85699	1.53465	1.31123	0.385056	0.145641	0.256533
ENSG00000151276,23	MAGI1	protein_coding	40.2732	41.0725	23.166	29.9794	33.0558	28.0358	24.3607	15.3053	27.089
ENSG00000229117,8	RPL41	protein_coding	4447.97	4913.64	6999.56	5270.09	5700.94	6099.24	6895.5	9292.23	7038.67
ENSG00000256779,2	AP002383,3	transcribed_processed_pseudogene	0	0	0	0	0.3701	0	0.493969	0.284381	1.87428
ENSG00000214827,9	MTCP1	protein_coding	7.48248	4.99853	14.129	11.4966	13.1733	13.3018	13.3972	21.893	18.2244
ENSG00000160584,15	SIK3	protein_coding	35.0363	39.2422	26.9272	32.6814	32.5683	32.9043	27.865	17.2972	25.7187
ENSG00000018610,14	CXorf56	protein_coding	22.8598	21.021	20.1322	23.8827	23.3613	28.7625	27.3314	25.6405	26.8769
ENSG00000148925,10	BTBD10	protein_coding	27.7094	24.0278	28.2429	28.6095	36.8888	31.1986	35.3206	29.8057	35.6442
ENSG00000165152,8	TMEM246	protein_coding	13.939	13.796	15.1067	15.9776	15.7909	17.1427	16.4775	16.4907	18.8578
ENSG00000197921,5	HES5	protein_coding	5.01092	4.8513	4.25397	2.10526	1.88299	2.14584	2.14649	2.5861	2.47428
ENSG00000259134,6	LINC00924	lincRNA	1.91061	2.01798	1.82691	1.01878	2.22299	1.77854	1.06279	0.58964	1.00929
ENSG00000132475,10	H3F3B	protein_coding	580.68	685.356	785.442	723.481	775.813	852.07	853.372	904.489	857.324
ENSG00000213722,8	DDAH2	protein_coding	71.537	81.4029	100.483	69.8953	70.069	100.186	105.003	158.279	110.197
ENSG00000185019,16	UBOX5	protein_coding	3.78843	3.96923	3.71911	3.87928	4.72919	4.26492	4.90433	4.2777	5.97242
ENSG00000177301,14	KCNA2	protein_coding	32.4006	33.6935	19.8266	30.3397	27.4662	25.7903	22.9555	11.6248	19.7394
ENSG00000101199,12	ARFGAP1	protein_coding	82.6332	87.6703	83.504	59.4068	61.0673	73.374	72.3777	53.7175	65.8159
ENSG00000125995,15	ROMO1	protein_coding	144.161	192.357	251.416	176.459	187.389	244.362	255.788	478.752	243.04
ENSG00000155115,6	GTF3C6	protein_coding	53.2184	50.4686	73.8349	64.5363	67.1001	64.4858	74.0319	93.3995	80.7411
ENSG00000148411,7	NACC2	protein_coding	20.9386	21.4308	14.0165	29.457	28.9722	34.3531	27.2389	18.4401	29.6701
ENSG00000151320,10	AKAP6	protein_coding	4.16549	4.97614	2.09858	1.58956	1.57995	1.31912	1.97022	1.11144	2.81152
ENSG00000159352,15	PSMD4	protein_coding	187.272	186.165	208.909	203.468	217.934	225.148	221.522	285.509	239.041
ENSG00000111752,10	PHC1	protein_coding	44.0421	36.6845	33.1891	37.6526	39.4089	38.1847	29.0879	18.6959	32.7129
ENSG00000152270,8	PDE3B	protein_coding	4.00793	4.64911	3.11523	3.98138	3.62928	3.35079	2.58645	2.41736	2.73468
ENSG00000158769,17	F11R	protein_coding	0	0.025102	0.012509	0.066375	0.862311	0.070204	0.20206	0.205064	0.165421
ENSG00000167552,13	TUBA1A	protein_coding	1945.14	1870.28	2216.65	1915.64	2004.58	2052.48	2409.32	2265.55	2454.13
ENSG00000160932,10	LY6E	protein_coding	4.81945	5.29068	7.27614	4.34851	4.94207	6.42606	9.09656	11.5897	8.89931
ENSG00000131374,14	TBC1D5	protein_coding	33.489	30.0725	22.2699	21.5101	20.2009	17.5682	23.1129	11.1691	20.5898
ENSG00000078668,13	VDAC3	protein_coding	135.737	143.476	176.734	157.526	168.244	175.527	179.939	213.927	195.744
ENSG00000180891,12	CUEDC1	protein_coding	62.7073	73.4607	60.9395	76.1245	74.576	80.1243	82.7984	64.024	92.5173
ENSG00000127241,16	MASP1	protein_coding	45.8958	40.6494	36.9841	23.4878	27.1422	24.3467	34.0649	23.589	32.7687
ENSG00000168067,11	MAP4K2	protein_coding	9.17564	7.07989	6.20867	7.51732	6.23088	11.63	11.6154	10.6808	10.749
ENSG00000159256,12	MORC3	protein_coding	30.4485	30.5283	24.4349	26.9764	26.6474	25.914	22.3055	20.3064	21.8964
ENSG00000204469,12	PRRC2A	protein_coding	144.875	147.217	113.71	123.33	124.446	134.09	111.718	81.9108	113.543
ENSG00000178904,18	DPY19L3	protein_coding	32.5913	39.1086	27.0261	36.5355	34.3388	32.2077	25.6086	17.9553	26.6596
ENSG00000204054,13	LINC00963	processed_transcript	25.6351	22.4844	17.8091	23.0353	24.6083	21.3143	25.978	24.4535	34.3166
ENSG00000285918,1	AC092376,3	antisense	1.61082	1.72199	0.571631	0.09946	0.27953	0	0	0.072068	0.384887
ENSG00000101439,8	CST3	protein_coding	119.313	129.682	194.849	112.666	129.134	149.83	187.936	295.646	193.461
ENSG00000106211,8	HSPB1	protein_coding	255.524	284.177	481.506	274.832	302.337	317.575	471.623	630.153	449.635
ENSG00000170276,5	HSPB2	protein_coding	0	0	0	0	0.41677	0.47509	0.334507	0.452264	0.344209
ENSG00000051596,9	THOC3	protein_coding	36.9026	42.8522	47.7329	43.4737	44.414	52.9676	55.347	48.8067	59.3247
ENSG00000257923,10	CUX1	protein_coding	45.1962	45.9065	34.1714	34.0569	30.3527	30.9851	32.3448	21.1155	35.2167
ENSG00000171914,16	TLN2	protein_coding	6.50246	7.55024	3.45526	7.93988	3.56492	5.69102	3.0716	3.16646	3.10712
ENSG00000170667,14	RASA4B	protein_coding	10.2736	14.5862	12.6682	10.8601	9.50986	16.8159	19.6535	15.5349	18.9315
ENSG00000161800,12	RACGAP1	protein_coding	97.3511	94.9595	81.9302	106.682	94.3556	98.9213	73.9748	59.5331	78.5304
ENSG00000279861,1	AC073548,1	TEC	1.20734	0.845032	1.22562	0.599324	0.771943	0.525237	0.145605	0.544443	0.070995
ENSG00000180190,11	TDRP	protein_coding	7.83892	8.42096	10.198	4.81111	6.13579	5.89816	5.70885	6.06679	5.80532
ENSG00000121481,10	RNF2	protein_coding	25.2979	25.5484	22.8793	24.6009	25.0061	17.9893	19.6075	12.1876	18.3322
ENSG00000169031,19	COL4A3	protein_coding	0	0	0	0.038405	0	0.013527	0.011838	0.409722	0
ENSG00000225449,3	RAB6C-AS1	transcribed_unprocessed_pseudogene	0	0	0	0.119103	0.207309	0.252962	0.277686	0.205456	0.099803
ENSG00000047249,17	ATP6V1H	protein_coding	28.1774	34.5596	29.3633	30.4613	28.8875	30.7427	37.5546	49.2743	36.4217
ENSG00000103707,9	MTFMT	protein_coding	10.1901	8.94509	9.74901	16.4312	14.7062	15.5494	14.8521	9.96911	14.2944
ENSG00000250479,8	CHCHD10	protein_coding	45.3977	44.3148	76.6178	42.2474	44.7662	50.8732	81.8369	114.396	70.509
ENSG00000167123,18	CERCAM	protein_coding	32.821	37.7409	36.4656	25.8048	25.5607	33.5105	43.0522	51.8118	44.4918
ENSG00000127220,5	ABHD8	protein_coding	3.50764	4.46425	4.12359	2.83697	3.67092	3.3516	5.53502	5.77204	6.49739
ENSG00000280043,1	AC118282,4	TEC	0	0.076689	0	0.066926	0.124438	0.142255	0.312487	0.53297	0.256767
ENSG00000268083,5	AC008982,1	protein_coding	0	0	0.690921	0	0.835256	3.22433	1.62288	5.56017	1.13471
ENSG00000279161,1	AC093503,3	TEC	2.96082	4.0755	2.43109	1.03412	1.87033	2.44265	1.88071	1.15642	1.56974
ENSG00000117724,12	CENPF	protein_coding	116.697	115.016	120.788	128.771	138.914	151.558	139.058	117.103	151.155
ENSG00000167526,13	RPL13	protein_coding	1513.12	1574.71	1975.36	1489.44	1617.39	1804.7	1981.85	2738.88	2122.88
ENSG00000281398,4	SNHG4	lincRNA	20.7212	22.2642	21.88	16.0091	15.2793	18.8322	13.4182	16.3408	13.3399
ENSG00000179168,14	GGN	protein_coding	0.919527	0.566321	1.76273	0.744192	1.07397	1.45111	3.064	4.03022	1.51584
ENSG00000244115,1	DNAJC25-GNG10	protein_coding	35.7709	28.0287	44.1809	32.3462	33.2042	36.5962	41.9705	68.0294	49.8306
ENSG00000076003,4	MCM6	protein_coding	69.4974	74.3006	70.8431	66.7011	66.3218	75.3039	54.2286	50.9027	63.6253
ENSG00000099251,14	HSD17B7P2	transcribed_unprocessed_pseudogene	7.11843	6.75633	9.05953	3.94792	1.48886	2.66496	3.37658	4.54744	2.70575
ENSG00000068878,14	PSME4	protein_coding	39.5626	37.4502	43.9812	47.9152	42.8282	46.0164	47.8261	44.9414	51.6738
ENSG00000119673,14	ACOT2	protein_coding	29.0075	30.8282	36.9687	31.8496	30.3652	44.1179	39.0438	53.7279	43.9853
ENSG00000119669,4	IRF2BPL	protein_coding	80.3232	75.6402	59.1897	81.0829	80.7487	90.3888	89.5792	71.8316	99.3832
ENSG00000285238,2	AC006064,6	protein_coding	8.08916	7.31342	10.7148	10.4847	20.6081	20.4073	10.3439	14.4308	17.8539
ENSG00000182154,7	MRPL41	protein_coding	34.0628	41.4449	51.841	37.4654	43.7191	48.578	54.2278	68.5856	56.9347
ENSG00000141540,10	TTYH2	protein_coding	8.62299	6.25195	7.25981	6.91235	3.92954	3.5795	3.94389	4.03081	4.86005
ENSG00000174348,13	PODN	protein_coding	0.693628	0.70098	0.548867	0.665671	0.654039	1.03711	1.32561	1.58497	1.16363
ENSG00000145337,4	PYURF	protein_coding	80.0016	82.096	103.708	93.1	87.4066	98.8102	110.242	155.555	105.517
ENSG00000166106,3	ADAMTS15	protein_coding	0.295222	0.25131	0.146105	0.535727	0.39056	0.605476	0.581431	0.360636	0.559849
ENSG00000104221,12	BRF2	protein_coding	6.23337	5.92416	6.76307	8.62885	8.13397	7.80774	8.63366	8.46595	8.13819
ENSG00000146556,14	WASH2P	transcribed_unprocessed_pseudogene	9.03035	7.27059	7.00484	5.13127	6.72094	6.47465	5.08741	5.14345	4.91315
ENSG00000012061,15	ERCC1	protein_coding	98.9454	86.9787	110.794	103.893	93.4626	114.503	122.697	183.376	114.874
ENSG00000196422,10	PPP1R26	protein_coding	22.6162	21.6925	20.6069	15.6836	22.4617	24.2927	15.3788	10.3364	18.2769
ENSG00000170396,7	ZNF804A	protein_coding	2.57178	2.39038	1.83409	0.859594	0.99779	0.762226	1.1208	0.483924	1.72076
ENSG00000012983,11	MAP4K5	protein_coding	37.8194	44.3718	31.5184	26.0096	33.1791	35.472	25.6555	18.2009	33.0301
ENSG00000167978,16	SRRM2	protein_coding	280.293	306.376	250.167	259.551	249.381	247.133	209.821	216.935	189.192
ENSG00000027001,9	MIPEP	protein_coding	10.3432	10.6291	11.0359	10.943	9.09663	13.6535	12.8894	15.7086	15.1381
ENSG00000150316,11	CWC15	protein_coding	58.5915	56.9068	71.033	66.8131	69.3976	65.4838	70.7147	102.778	81.8035
ENSG00000128833,12	MYO5C	protein_coding	19.457	19.2934	14.8717	12.5742	11.3242	9.77828	14.502	9.10437	13.5223
ENSG00000099864,17	PALM	protein_coding	25.8049	28.4519	26.6529	24.7438	24.1348	29.805	31.2457	33.8908	34.6662
ENSG00000243317,7	STMP1	protein_coding	69.4605	74.6879	96.9003	81.6756	84.2384	88.8246	97.0376	133.595	100.745
ENSG00000256940,1	AP001453,2	antisense	5.48699	2.29319	5.49915	8.97078	7.46555	7.5684	10.4029	14.5159	8.843
ENSG00000279965,1	AL390755,1	TEC	1.78066	1.70885	2.11239	1.71664	1.59159	1.64582	3.35422	2.88559	3.28303
ENSG00000133789,14	SWAP70	protein_coding	39.5924	40.1262	33.2883	30.7529	26.966	29.7942	30.4088	22.5485	32.316
ENSG00000103326,11	CAPN15	protein_coding	19.689	21.9115	16.5778	15.334	17.7025	20.2473	12.9501	11.5182	16.7517
ENSG00000177239,14	MAN1B1	protein_coding	60.4791	61.7516	59.2577	59.3216	57.7135	66.3816	66.0608	72.327	76.5246
ENSG00000168778,11	TCTN2	protein_coding	8.20869	8.00211	8.71012	9.29955	10.3185	8.49118	10.359	10.4224	11.4311
ENSG00000049192,14	ADAMTS6	protein_coding	1.19775	0.683838	0.520579	0.199038	0.118905	0.221416	0.288945	0.273583	0.393436
ENSG00000137504,13	CREBZF	protein_coding	64.3158	63.8801	66.7734	57.0516	50.7432	61.151	50.4941	49.2462	45.2145
ENSG00000146707,14	POMZP3	protein_coding	19.416	17.6923	20.4285	24.3305	22.6603	25.9038	24.6436	24.122	24.3062
ENSG00000277053,4	GTF2IP1	transcribed_unprocessed_pseudogene	142.819	139.257	130.106	117.118	114.482	112.915	110.285	91.1913	125.847
ENSG00000166250,11	CLMP	protein_coding	5.93751	5.57104	4.10056	6.18177	4.77161	4.85352	3.86304	3.03123	3.26455
ENSG00000281183,1	NPTN-IT1	sense_intronic	2.05177	2.00689	1.72185	1.17229	1.31133	1.60616	1.36394	0.530183	0.746048
ENSG00000184047,17	DIABLO	protein_coding	47.6067	52.676	54.6265	54.3893	56.8226	64.8588	65.6087	64.6259	61.5071
ENSG00000164919,10	COX6C	protein_coding	400.06	441.275	762.417	444.374	457.099	505.105	640.155	1283.45	717.126
ENSG00000137714,2	FDX1	protein_coding	12.2724	12.5901	13.7472	13.5919	13.6242	14.9638	14.5215	17.935	17.1138
ENSG00000228300,13	C19orf24	protein_coding	23.9757	26.7991	33.5173	30.3365	27.622	31.6786	31.6082	62.1624	39.7781
ENSG00000204149,10	AGAP6	protein_coding	9.48558	10.6286	12.8669	8.32044	8.01995	9.79716	7.08714	7.1527	8.04046
ENSG00000272949,1	AC093668,2	protein_coding	0	0.152688	0	0.405184	0.115155	0	0.323389	0.369704	0.620076
ENSG00000182544,8	MFSD5	protein_coding	12.5343	17.0872	20.6919	20.6352	22.1524	21.7772	21.2371	29.8262	23.0068
ENSG00000113845,9	TIMMDC1	protein_coding	86.0785	104.613	110.929	114.218	98.7193	108.892	119.244	202.278	120.424
ENSG00000171840,11	NINJ2	protein_coding	4.24957	3.73731	6.5137	1.73231	1.17128	0.615632	1.96169	1.99166	2.03306
ENSG00000041353,9	RAB27B	protein_coding	1.07854	1.06726	0.435155	0.685307	0.66866	0.69406	0.343371	0.258045	0.55377
ENSG00000116133,12	DHCR24	protein_coding	142.01	138.387	104.806	119.002	117.811	124.261	95.4839	65.0327	114.407
ENSG00000129473,9	BCL2L2	protein_coding	26.2592	29.636	22.1539	21.5178	22.4088	24.2571	18.8471	19.3977	15.2335
ENSG00000136810,12	TXN	protein_coding	284.384	310.136	487.331	366.077	388.77	406.457	452.181	706.002	467.472
ENSG00000170153,10	RNF150	protein_coding	0.98452	0.978101	0.592327	0.486534	0.892508	0.255718	0.362886	0.242346	0.467507
ENSG00000229807,11	XIST	lincRNA	131.907	146.867	105.681	125.786	117.622	118.055	99.8582	92.4815	93.6932
ENSG00000213977,7	TAX1BP3	protein_coding	32.2934	30.1371	44.6054	33.0678	37.0333	46.2369	44.677	62.856	48.2721
ENSG00000123989,13	CHPF	protein_coding	113.694	117.456	117.124	85.6131	90.4594	117.061	135.726	142.982	147.785
ENSG00000149100,12	EIF3M	protein_coding	198.191	232.044	260.323	237.723	236.502	265.512	274.355	375.375	280.853
ENSG00000054690,13	PLEKHH1	protein_coding	8.29533	5.52835	5.81761	4.45209	4.959	8.1892	4.98204	2.78199	3.75465
ENSG00000143369,14	ECM1	protein_coding	3.349	3.76998	5.65915	8.56245	7.21431	7.6347	6.72797	6.37116	6.61759
ENSG00000123505,15	AMD1	protein_coding	36.7187	39.5012	35.7382	41.1464	41.3589	47.4705	41.9619	42.6971	46.4357
ENSG00000197747,8	S100A10	protein_coding	156.92	166.432	362.086	204.327	225.003	200.942	357.645	427.167	328.795
ENSG00000269893,6	SNHG8	lincRNA	30.3923	50.1718	65.8675	60.9541	74.3485	64.393	70.3194	117.421	68.1541
ENSG00000116604,17	MEF2D	protein_coding	13.6036	13.09	11.2789	11.7154	10.0862	10.7693	10.795	7.77153	8.94228
ENSG00000165801,9	ARHGEF40	protein_coding	72.3253	73.1306	54.7503	68.8446	73.5833	81.9626	46.1589	45.9989	56.5821
ENSG00000169020,9	ATP5ME	protein_coding	310.773	287.372	604.514	320.967	357.627	363.17	548.762	893.188	543.059
ENSG00000136827,11	TOR1A	protein_coding	54.2837	49.6815	62.2476	68.0149	71.4022	73.0202	64.9163	66.0169	72.6885
ENSG00000156374,15	PCGF6	protein_coding	14.494	12.1896	13.1523	15.2103	15.2497	18.7464	15.6245	18.8944	17.4608
ENSG00000169851,15	PCDH7	protein_coding	36.5572	39.8194	18.6715	21.4177	23.42	20.7627	19.1379	11.4703	25.82
ENSG00000007047,14	MARK4	protein_coding	26.1611	29.2459	20.408	31.0264	21.8854	31.3636	35.6549	26.4613	40.0104
ENSG00000128626,11	MRPS12	protein_coding	23.517	24.4954	37.5605	29.7697	27.1347	31.026	38.0233	46.9368	40.2538
ENSG00000204291,10	COL15A1	protein_coding	17.9317	15.2336	14.9408	14.999	16.5574	16.3882	12.0795	10.8637	13.6645
ENSG00000169288,17	MRPL1	protein_coding	24.5934	21.863	21.0877	29.7267	25.5974	32.2083	27.6448	29.6036	28.5425
ENSG00000255339,6	AL133352,1	protein_coding	4.0228	6.57191	4.57786	8.846	3.97767	2.91396	2.37695	1.87885	2.49149
ENSG00000142552,7	RCN3	protein_coding	4.44509	7.09684	5.14501	2.40195	2.15159	4.01841	2.21679	3.57432	1.75219
ENSG00000013583,9	HEBP1	protein_coding	26.6093	24.9706	28.1593	22.7809	28.3312	30.9207	36.6589	32.7782	33.6569
ENSG00000147684,8	NDUFB9	protein_coding	110.229	137.736	172.312	137.935	154.518	172.458	165.304	264.916	186.809
ENSG00000110717,12	NDUFS8	protein_coding	100.368	106.459	169.049	104.037	124.511	131.461	165.179	235.715	162.969
ENSG00000204822,6	MRPL53	protein_coding	47.4266	45.6483	79.5663	51.3684	67.8639	59.827	68.2834	144.363	77.4968
ENSG00000115520,8	COQ10B	protein_coding	15.2261	15.015	15.6862	13.5263	15.7725	19.0471	19.6418	17.8753	20.8894
ENSG00000134013,15	LOXL2	protein_coding	29.6546	27.6655	28.5658	23.7276	26.3931	29.4242	23.9612	17.1584	23.5587
ENSG00000092068,19	SLC7A8	protein_coding	1.68883	1.4006	1.24497	2.29785	2.58715	2.43739	3.14264	1.76059	2.25177
ENSG00000125877,12	ITPA	protein_coding	59.2674	68.8116	79.6767	66.7468	76.0566	93.7517	86.6353	129.637	84.503
ENSG00000186106,11	ANKRD46	protein_coding	10.1206	8.33385	9.16042	10.0813	9.15038	11.469	14.1443	9.79804	12.5475
ENSG00000185800,11	DMWD	protein_coding	47.8618	50.1072	36.8471	41.4879	41.4306	45.1719	35.4049	25.514	37.5107
ENSG00000100395,14	L3MBTL2	protein_coding	21.02	23.3826	21.6282	26.0051	29.0935	31.4321	25.5391	27.8261	27.1056
ENSG00000278948,1	AL031587,5	TEC	18.0032	14.6767	8.81487	18.2237	20.7939	21.7677	20.2063	14.2574	29.2658
ENSG00000124067,16	SLC12A4	protein_coding	35.8832	43.7623	28.5155	50.6292	41.2732	45.0383	48.692	37.2906	54.5159
ENSG00000090924,14	PLEKHG2	protein_coding	35.5988	55.2333	32.9428	45.5591	35.5378	49.0255	33.612	16.8781	26.8647
ENSG00000128268,11	MGAT3	protein_coding	9.1555	9.01036	6.86419	4.74142	5.41263	5.82798	6.20133	4.81183	6.73918
ENSG00000204366,3	ZBTB12	protein_coding	22.7303	18.3853	20.2443	15.5847	17.8308	18.5404	16.2267	12.0242	15.9635
ENSG00000119185,12	ITGB1BP1	protein_coding	84.2208	92.7073	104.967	102.005	108.989	109.44	110.484	140.105	116.492
ENSG00000008294,20	SPAG9	protein_coding	101.719	104.656	72.8945	81.1987	82.7148	82.9991	74.1773	43.2865	76.249
ENSG00000149557,13	FEZ1	protein_coding	229.68	235.582	271.929	202.115	227.928	229.273	290.622	309.587	299.414
ENSG00000148700,14	ADD3	protein_coding	24.1682	22.0277	22.7361	16.5118	20.1509	16.0666	17.9505	11.4818	19.3293
ENSG00000159403,16	C1R	protein_coding	29.1561	29.1283	32.933	24.0083	23.035	43.6918	38.1338	53.2581	43.462
ENSG00000125611,15	CHCHD5	protein_coding	23.4754	31.101	46.4434	21.7003	28.6787	30.8219	46.9233	75.6752	46.8093
ENSG00000128595,16	CALU	protein_coding	557.526	547.545	571.737	571.414	580.103	584.617	485.727	390.774	482.856
ENSG00000076108,11	BAZ2A	protein_coding	47.4248	53.2651	22.8926	40.7356	40.2739	35.1917	28.7104	14.7049	29.1573
ENSG00000127334,10	DYRK2	protein_coding	9.30613	9.38843	6.28437	8.87971	9.18455	6.96317	5.97546	3.86908	6.52322
ENSG00000249590,7	AC004832,3	protein_coding	0	0.751601	2.37244	4.61037	0.308933	2.14358	7.26526	2.58869	6.6314
ENSG00000137154,12	RPS6	protein_coding	1389.92	1454.44	1736.35	1501.46	1596.11	1763	1793.89	2156.36	1873.33
ENSG00000103489,11	XYLT1	protein_coding	17.6985	17.6834	11.8641	9.73458	9.46543	9.69594	13.2528	6.62067	11.2584
ENSG00000149548,14	CCDC15	protein_coding	4.58214	4.10553	2.96257	6.99519	6.77627	5.84022	4.74757	4.57368	7.06989
ENSG00000188859,6	FAM78B	protein_coding	0.394278	0.373373	0.181959	0.072053	0.186066	0	0.066767	0	0
ENSG00000005194,14	CIAPIN1	protein_coding	71.2648	76.3481	82.2737	87.0923	87.0416	105.918	88.1159	96.5623	98.4656
ENSG00000169330,8	KIAA1024	protein_coding	0.417771	0.486535	0.295539	0.464326	0.405083	0.42533	0.171839	0.100709	0.205053
ENSG00000197822,10	OCLN	protein_coding	4.25601	5.3806	4.25408	2.77895	3.89767	3.26209	3.48418	1.30571	2.99376
ENSG00000132549,18	VPS13B	protein_coding	7.65794	7.28531	6.59741	4.89619	3.98653	3.76309	6.43202	3.66264	4.31156
ENSG00000105376,4	ICAM5	protein_coding	3.53499	4.72893	3.41486	0.939122	0.740435	0.880009	2.60294	1.48575	2.43351
ENSG00000251615,3	AC104825,1	lincRNA	0.326981	0.037724	0.037592	0.165843	0.061187	0.175618	0	0	0
ENSG00000132846,5	ZBED3	protein_coding	13.6827	8.3811	9.29216	10.2348	12.3615	9.06516	7.44333	4.36968	8.10154
ENSG00000204624,7	DISP3	protein_coding	4.27511	3.67083	3.98686	3.49577	2.81535	3.65377	2.40829	1.80913	3.45322
ENSG00000179029,14	TMEM107	protein_coding	35.3702	36.9534	44.6228	33.6592	36.3775	40.5983	48.4494	56.8569	49.688
ENSG00000198816,6	ZNF358	protein_coding	48.8757	55.7204	45.8077	60.0215	51.4761	73.3899	56.5922	76.3115	65.973
ENSG00000167118,10	URM1	protein_coding	94.13	99.0979	115.337	109.2	99.7024	131.386	125.933	138.413	128.441
ENSG00000280081,3	LINC01667	lincRNA	0	0	0	0.108074	0.101454	0.176366	0.508407	0.336632	0.314387
ENSG00000267666,2	AC004156,1	lincRNA	0.089012	0.073741	0.110226	0.356661	0.418615	0.240325	0.481445	0.254369	0.30819
ENSG00000119242,8	CCDC92	protein_coding	38.4235	33.0278	36.4019	38.3888	37.5321	43.3852	41.2686	41.0864	46.8814
ENSG00000111142,13	METAP2	protein_coding	116.975	111.156	100.632	132.304	130.95	125.283	112.928	132.543	153.369
ENSG00000124193,14	SRSF6	protein_coding	113.885	116.653	107.48	118.909	123.937	124.787	98.9523	65.6529	94.4464
ENSG00000175906,4	ARL4D	protein_coding	3.28857	4.02846	4.4224	4.58697	4.26913	5.48713	5.091	9.02959	5.7817
ENSG00000179935,9	LINC00652	lincRNA	0.241256	0.414175	0.351319	0.358964	0.812582	1.01518	1.1808	1.00575	0.594849
ENSG00000249087,6	ZNF436-AS1	antisense	5.85665	5.22353	9.26782	6.72442	5.52328	7.361	14.2857	12.4923	7.97656
ENSG00000105379,9	ETFB	protein_coding	69.6139	73.9565	95.227	61.9386	67.7626	83.9726	99.8745	131.417	101.222
ENSG00000176826,15	FKBP9P1	transcribed_unprocessed_pseudogene	8.74078	9.05009	6.78708	6.82749	8.88877	7.25559	11.5922	01,08,8245	12.4133
ENSG00000123268,8	ATF1	protein_coding	29.8371	17.7375	20.3527	21.6161	15.6188	23.8667	14.2666	14.2425	14.0306
ENSG00000117394,21	SLC2A1	protein_coding	108.477	102.693	100.633	71.6251	70.9566	85.7016	89.8354	69.8603	83.1525
ENSG00000064995,17	TAF11	protein_coding	36.6071	35.0095	47.0534	40.9472	47.0605	38.2565	48.0411	53.7203	54.8645
ENSG00000173272,15	MZT2A	protein_coding	85.9859	80.7364	111.119	78.9527	89.7719	102.543	113.372	149.914	121.396
ENSG00000281591,1	DBET	lincRNA	0.236642	0.218215	0.054341	0.287752	0.147409	0.406232	0.237355	0.93717	0.647026
ENSG00000181649,6	PHLDA2	protein_coding	41.0016	44.5224	80.0026	49.8818	58.2271	62.4027	73.3596	112.548	78.4541
ENSG00000184611,11	KCNH7	protein_coding	0.577784	0.322774	0.264216	0.158763	0.055467	0.255909	0	0.086516	0.057214
ENSG00000168802,12	CHTF8	protein_coding	97.5931	97.133	100.12	119.972	132.179	130.589	111.684	99.6308	129.928
ENSG00000124772,11	CPNE5	protein_coding	11.3418	13.2553	14.5795	7.99664	6.55154	9.05187	15.9537	16.0069	22.1532
ENSG00000104936,17	DMPK	protein_coding	50.3828	55.759	47.6337	37.8261	45.4033	54.2447	38.359	34.7358	40.1254
ENSG00000072858,10	SIDT1	protein_coding	0	0	0	0.062157	0.019055	0.074454	0.057562	0.029963	0.339384
ENSG00000268471,6	MIR4453HG	bidirectional_promoter_lncRNA	5.25469	3.57636	5.12033	3.17857	4.5007	3.90265	3.05241	2.50832	3.12727
ENSG00000132424,15	PNISR	protein_coding	47.284	56.9312	49.7199	40.5212	45.7599	40.4056	36.8594	29.1351	46.7778
ENSG00000232533,1	AC093673,1	antisense	41.1776	54.5831	53.3082	41.6595	41.7371	47.2518	54.6357	98.7885	69.3283
ENSG00000148343,18	MIGA2	protein_coding	28.6711	31.6814	21.5709	24.0541	21.967	28.7923	18.3903	19.492	18.2654
ENSG00000149212,11	SESN3	protein_coding	43.4127	40.7682	25.8941	34.1625	33.2491	32.9691	28.6299	17.3224	28.5415
ENSG00000093167,17	LRRFIP2	protein_coding	27.9665	28.6559	27.8121	33.912	37.4641	29.6344	43.3441	29.8495	34.18
ENSG00000188761,12	BCL2L15	protein_coding	2.82993	0.020338	0.044691	0.131631	0.581548	0.373103	0.116253	0.121863	0.07495
ENSG00000185340,15	GAS2L1	protein_coding	20.8761	20.4583	17.5931	17.604	19.0434	21.8059	21.6531	24.3769	26.8637
ENSG00000206503,12	HLA-A	protein_coding	158.195	175.687	219.116	156.217	160.67	176.979	222.217	316.138	221.683
ENSG00000125148,6	MT2A	protein_coding	59.1795	58.0378	129.554	70.9748	80.3241	91.3702	108.132	193.945	120.296
ENSG00000240065,7	PSMB9	protein_coding	14.58	14.3438	20.3043	15.3616	18.4889	16.1317	20.3709	30.9373	25.1385
ENSG00000136944,17	LMX1B	protein_coding	2.48017	3.7194	2.05591	2.06446	1.36144	1.82232	1.3707	1.0174	2.12881
ENSG00000004142,11	POLDIP2	protein_coding	80.5331	76.2951	71.98	89.2114	92.761	102.435	90.8932	76.1095	93.3486
ENSG00000170296,9	GABARAP	protein_coding	278.723	340.572	519.247	379.081	367.064	398.826	456.985	711.542	529.41
ENSG00000168152,12	THAP9	protein_coding	5.56372	4.46595	3.77663	4.69007	5.90855	4.58096	3.13513	2.57959	2.97363
ENSG00000170876,7	TMEM43	protein_coding	34.3529	37.1374	38.3249	46.7362	48.1904	50.7908	43.6321	38.1899	45.9753
ENSG00000101812,12	H2BFM	protein_coding	3.50073	2.35739	3.68553	1.92493	1.56337	0.958268	1.23432	1.61105	1.61264
ENSG00000162572,20	SCNN1D	protein_coding	7.68324	7.15646	8.96388	4.65611	4.59487	4.2907	4.37752	5.36203	5.73051
ENSG00000120885,21	CLU	protein_coding	430.752	411.321	580.757	404.698	446.933	451.497	587.448	704.26	588.327
ENSG00000126070,19	AGO3	protein_coding	9.10647	15.2827	7.04855	8.72241	8.39957	5.62818	6.73537	4.96001	7.00537
ENSG00000069943,9	PIGB	protein_coding	6.33335	5.42623	7.14332	5.759	6.92839	8.02521	6.88602	10.7132	11.8709
ENSG00000102409,9	BEX4	protein_coding	0.223254	0.542088	0.617671	0.584764	1.21023	0.499871	1.76726	1.6903	1.39319
ENSG00000175183,9	CSRP2	protein_coding	104.587	107.556	165.886	138.576	161.046	158.59	156.186	233.519	162.937
ENSG00000111726,12	CMAS	protein_coding	40.6625	45.985	44.0256	44.0428	42.6112	52.5863	50.5487	69.6159	53.197
ENSG00000099139,13	PCSK5	protein_coding	24.9917	25.4918	19.4585	17.2467	17.6279	19.4567	17.7036	12.6359	20.5704
ENSG00000138674,16	SEC31A	protein_coding	109.362	102.21	86.8423	99.4266	101.149	97.3603	83.8779	64.1961	84.105
ENSG00000130829,17	DUSP9	protein_coding	1.85554	1.80992	2.38277	0.33897	0.58271	0.997145	0.856315	0.770887	0.924415
ENSG00000197410,13	DCHS2	protein_coding	4.73118	3.99322	2.24607	2.51062	3.05932	2.46405	2.6929	1.18223	2.31095
ENSG00000154027,18	AK5	protein_coding	1.15288	1.53602	1.24494	0.269556	0.608684	0.105302	0.04834	0.133466	0.671735
ENSG00000155254,12	MARVELD1	protein_coding	99.0312	87.2779	91.0773	93.125	90.5234	94.6084	106.568	92.8962	114.056
ENSG00000146540,14	C7orf50	protein_coding	233.457	253.126	273.9	190.569	232.645	267.022	294.787	375.868	318.415
ENSG00000144785,8	AC073896,1	protein_coding	2.55786	2.87407	2.28406	2.65851	2.58158	2.66852	3.11594	10.7325	4.97188
ENSG00000170889,13	RPS9	protein_coding	996.418	1038.93	1415.87	1132.34	1193.65	1261.24	1404.36	1898.65	1403.51
ENSG00000258947,6	TUBB3	protein_coding	134.387	132.37	158.153	151.575	161.805	175.563	172.62	155.937	179.216
ENSG00000228327,3	AL669831,1	transcribed_unprocessed_pseudogene	4.64439	6.43021	4.72271	4.38403	3.85886	4.70124	3.84839	3.11343	4.02218
ENSG00000244462,7	RBM12	protein_coding	65.4997	56.5842	47.7354	50.4749	50.9531	47.7558	45.7977	33.1537	47.8665
ENSG00000125945,14	ZNF436	protein_coding	13.0126	13.8425	10.3015	17.858	17.5376	17.1757	18.0348	11.6744	17.9015
ENSG00000124181,14	PLCG1	protein_coding	201.569	209.051	168.043	157.45	162.029	162.371	159.002	116.093	169.643
ENSG00000188157,14	AGRN	protein_coding	134.324	155.153	120.592	109.192	116.798	132.431	114.419	91.7744	108.264
ENSG00000139190,16	VAMP1	protein_coding	5.55861	8.43429	9.76422	4.17167	4.39004	5.50705	4.70869	5.11022	4.69152
ENSG00000174928,15	C3orf33	protein_coding	2.81213	5.2615	4.10083	4.2622	4.63764	6.21468	5.53357	7.54821	6.47259
ENSG00000196547,14	MAN2A2	protein_coding	48.6163	52.9701	41.5217	45.4631	45.291	46.6074	41.603	21.6212	36.52
ENSG00000161048,11	NAPEPLD	protein_coding	10.5452	12.4764	6.69846	10.1321	8.27107	11.3701	6.00587	5.53472	7.34609
ENSG00000111670,15	GNPTAB	protein_coding	5.06092	5.55868	4.74458	5.66867	6.35347	5.63699	7.43433	4.95466	7.47314
ENSG00000109458,8	GAB1	protein_coding	32.4496	34.2637	24.0346	32.0357	30.1664	25.0613	22.824	10.2327	24.0891
ENSG00000256028,2	AC026362,1	processed_transcript	2.16258	2.34685	2.63546	1.32704	1.55467	1.02943	1.76831	0.947643	1.57681
ENSG00000152894,14	PTPRK	protein_coding	10.7826	12.7061	6.3816	5.66949	4.62685	6.71795	7.6072	4.70957	5.91842
ENSG00000176142,12	TMEM39A	protein_coding	19.709	18.8449	17.2057	12.9946	16.5461	16.2551	16.1887	8.57288	13.019
ENSG00000100934,14	SEC23A	protein_coding	70.8262	54.2755	39.5085	47.2298	52.5854	53.964	41.07	25.5229	43.5988
ENSG00000258315,5	C17orf49	protein_coding	58.2248	56.8592	102.708	52.7291	62.6382	68.3822	96.2831	138.618	99.8358
ENSG00000091732,16	ZC3HC1	protein_coding	38.8301	48.994	48.0955	49.7902	49.6686	55.8774	53.5437	59.2978	57.2049
ENSG00000083807,9	SLC27A5	protein_coding	14.2392	12.784	17.0361	11.6629	11.5736	12.6814	23.0611	25.1545	18.8604
ENSG00000114019,14	AMOTL2	protein_coding	18.1553	19.8799	15.3518	15.0776	14.5301	16.9905	14.5547	10.0063	14.5923
ENSG00000142168,14	SOD1	protein_coding	413.999	468.346	667.159	522.525	567.026	575.026	620.203	921.286	662.048
ENSG00000101158,13	NELFCD	protein_coding	99.0176	90.1452	116.722	78.9089	77.9158	78.3723	77.9161	73.2239	77.5829
ENSG00000186468,12	RPS23	protein_coding	1634.29	1852.19	2887.14	1922.37	2092.62	2191.29	2523.89	4347.72	2754.58
ENSG00000110169,10	HPX	protein_coding	0.926453	0.946706	0.749714	1.12328	0.97587	0.893095	0.755403	0.901299	11.1036
ENSG00000166682,11	TMPRSS5	protein_coding	9.08801	9.28878	11.1268	8.21591	10.2746	10.7438	16.1902	11.6472	13.9593
ENSG00000258738,1	AL121603,2	antisense	8.28557	6.14875	6.15615	8.97143	9.43753	8.84821	9.04458	8.78407	9.17813
ENSG00000013561,17	RNF14	protein_coding	43.2791	45.1862	38.0238	48.3414	50.2809	52.4469	49.7201	44.8188	51.4386
ENSG00000149218,4	ENDOD1	protein_coding	25.5857	24.0095	20.1565	28.7539	28.5291	27.0057	29.3092	22.2263	33.3491
ENSG00000088367,21	EPB41L1	protein_coding	14.1869	20.8627	13.7259	16.0449	9.29032	8.95862	11.8597	6.91171	10.4008
ENSG00000121390,18	PSPC1	protein_coding	59.8726	60.1423	57.3313	50.1495	49.9173	54.8699	66.7479	61.8806	73.0989
ENSG00000137936,17	BCAR3	protein_coding	11.2432	12.7659	12.5526	16.1091	14.8294	15.4826	15.4107	13.0211	16.208
ENSG00000166848,5	TERF2IP	protein_coding	58.9466	59.7145	67.1607	66.2381	63.9209	69.5902	66.9143	81.6683	81.3712
ENSG00000076554,15	TPD52	protein_coding	24.8942	14.67	24.6262	12.3488	13.7817	10.21	15.9556	12.3621	11.8683
ENSG00000038210,12	PI4K2B	protein_coding	27.1709	27.221	24.8186	27.9262	27.9943	28.3073	29.6039	27.0994	34.128
ENSG00000163344,5	PMVK	protein_coding	35.4688	38.5773	53.8639	44.2454	39.9036	44.9612	57.0896	76.9456	50.6181
ENSG00000189376,11	C8orf76	protein_coding	24.841	23.0804	29.3515	31.3733	39.6539	25.8861	36.5041	40.0814	32.253
ENSG00000184178,15	SCFD2	protein_coding	15.7191	16.6088	14.4944	11.8678	10.4082	11.7324	12.1965	8.40663	13.3874
ENSG00000130560,8	UBAC1	protein_coding	50.4909	56.5113	60.2207	55.8107	53.7268	62.5211	66.3432	69.2505	68.5351
ENSG00000167524,14	SGK494	protein_coding	19.2768	17.6782	14.9874	16.2593	14.8029	13.4105	13.2083	6.71047	13.1286
ENSG00000177614,10	PGBD5	protein_coding	0.437879	1.01135	0.672994	0.809147	0.275739	0.148836	0.410949	0.074696	0.150886
ENSG00000235043,3	TECRP1	processed_pseudogene	0	0	0	10.0791	2.72255	0	6.57768	60.3848	0
ENSG00000121068,13	TBX2	protein_coding	3.54979	3.08241	3.33002	4.58102	5.24366	5.73246	4.99481	3.32604	5.65127
ENSG00000069399,14	BCL3	protein_coding	18.3953	20.9752	24.6861	25.7104	26.0737	30.0009	25.5133	27.3965	30.2935
ENSG00000188610,12	FAM72B	protein_coding	13.0124	11.182	13.1381	17.1885	10.9858	14.5453	16.188	18.92	16.3655
ENSG00000139410,14	SDSL	protein_coding	7.18755	8.04183	6.42926	7.1453	5.95781	9.21369	8.60974	13.9938	10.6885
ENSG00000214063,10	TSPAN4	protein_coding	35.8082	34.3407	40.4258	21.554	23.179	26.3093	30.4757	22.1351	27.1344
ENSG00000009307,15	CSDE1	protein_coding	319.734	292.163	250.697	297.237	274.073	271.262	232.281	163.308	253.418
ENSG00000134452,19	FBH1	protein_coding	38.6918	42.9638	45.0108	45.9427	50.5189	53.8033	52.3967	47.5372	51.0828
ENSG00000139915,19	MDGA2	protein_coding	1.19876	1.47955	0.894579	0.288752	0.385265	0.175468	0.211279	0.141574	0.876077
ENSG00000164941,13	INTS8	protein_coding	36.2343	38.1628	42.0923	49.0462	40.6585	39.5733	20.7162	23.4082	35.2012
ENSG00000179010,14	MRFAP1	protein_coding	433.751	471.849	498.128	492.966	493.378	527.1	530.673	637.705	555.972
ENSG00000273771,1	AC024337,2	lincRNA	0.432332	0.133052	0.287256	0.116836	0.25179	0.082533	0.036185	0.028174	0.037081
ENSG00000148842,17	CNNM2	protein_coding	5.49582	7.07036	4.82364	3.87248	4.46001	3.71294	4.48965	3.41822	4.03644
ENSG00000138468,15	SENP7	protein_coding	25.6119	20.2425	19.6682	19.4645	17.1507	19.04	18.6727	11.0796	16.5958
ENSG00000259848,8	AC097374,1	transcribed_unprocessed_pseudogene	0.019338	0.089153	0.008886	0.031476	0.028914	0.033269	0.697275	0.056891	0.07447
ENSG00000106683,14	LIMK1	protein_coding	106.162	110.034	91.9893	110.849	118.948	125.53	119.034	102.57	129.834
ENSG00000174516,14	PELI3	protein_coding	3.71655	3.4263	3.03113	4.00855	3.91373	4.42085	7.80114	3.49711	4.69943
ENSG00000128973,12	CLN6	protein_coding	32.4906	29.7191	29.0563	31.0782	31.1743	33.2803	23.9349	20.2084	26.6091
ENSG00000189159,15	JPT1	protein_coding	318.9	327.256	464.367	288.782	345.953	364.252	438.284	674.773	466.4
ENSG00000246090,6	AP002026,1	antisense	3.47685	2.8893	1.66694	1.16527	2.54776	1.30775	0.566998	1.71076	0.760329
ENSG00000126603,8	GLIS2	protein_coding	16.2129	18.7349	17.346	13.5128	14.5776	16.5934	12.9601	11.5048	14.9688
ENSG00000175221,14	MED16	protein_coding	31.1802	37.9951	27.4237	33.6366	31.9286	37.3174	36.0154	51.3085	40.568
ENSG00000116205,13	TCEANC2	protein_coding	4.79183	5.59213	4.44218	6.30389	3.70936	8.62698	2.89647	3.02869	2.97238
ENSG00000159140,19	SON	protein_coding	378.968	404.676	250.195	382.877	391.186	319.624	238.92	198.308	285.924
ENSG00000132680,10	KHDC4	protein_coding	40.0393	35.8869	41.2774	38.6066	40.3614	40.3114	34.0486	26.1804	27.5571
ENSG00000176531,10	PHLDB3	protein_coding	5.83309	6.03328	3.99515	3.44913	5.60952	8.20776	8.68007	10.5092	7.3964
ENSG00000243156,7	MICAL3	protein_coding	24.4911	28.3263	15.0371	23.7663	18.6989	23.8371	17.8457	10.745	15.0989
ENSG00000167971,15	CASKIN1	protein_coding	6.90275	9.90823	4.07878	6.12948	5.17828	4.46146	4.81309	3.06967	4.15283
ENSG00000130748,6	TMEM160	protein_coding	69.575	70.9071	90.2326	61.3379	63.113	82.3686	90.8616	137.607	100.646
ENSG00000177971,8	IMP3	protein_coding	48.5497	49.9308	66.3728	51.479	56.0681	59.6801	63.2739	102.736	69.7928
ENSG00000162402,13	USP24	protein_coding	52.2626	49.4748	30.4297	39.8951	33.3904	35.9594	33.3561	18.0719	34.7258
ENSG00000108179,13	PPIF	protein_coding	59.0706	67.3569	77.6674	89.9036	93.9175	106.348	81.926	90.444	84.6955
ENSG00000006534,15	ALDH3B1	protein_coding	11.0575	10.3542	9.50558	11.0742	10.8321	11.5216	13.8834	10.3109	14.2033
ENSG00000133027,17	PEMT	protein_coding	22.3367	31.2013	35.2771	34.3301	26.5463	40.0546	29.6863	83.8202	42.6634
ENSG00000100058,12	CRYBB2P1	transcribed_unprocessed_pseudogene	35.7377	33.1912	44.0266	21.5386	26.3839	20.9331	26.8232	25.9311	23.711
ENSG00000179965,11	ZNF771	protein_coding	12.8693	13.4685	16.3536	16.2032	14.2287	16.3288	18.4625	20.6083	18.2148
ENSG00000174891,12	RSRC1	protein_coding	49.0217	40.1568	43.0107	34.8204	35.6262	32.0177	36.5052	23.2178	35.9113
ENSG00000185825,16	BCAP31	protein_coding	123.617	120.551	134.317	116.299	134.218	135.614	150.349	156.89	148.288
ENSG00000183023,18	SLC8A1	protein_coding	0.38016	0.260624	0.293463	0.190684	0.044557	0.046204	0.179387	0.049205	0.036712
ENSG00000205629,11	LCMT1	protein_coding	29.0405	24.6013	35.5346	26.9703	35.805	28.3219	35.0533	39.5286	48.3765
ENSG00000090316,15	MAEA	protein_coding	52.1371	50.1304	48.8367	58.123	56.5297	64.8716	53.6053	69.6229	63.8904
ENSG00000163597,14	SNHG16	processed_transcript	90.8871	89.124	90.3187	112.743	111.177	118.709	105.099	97.1526	103.439
ENSG00000113732,8	ATP6V0E1	protein_coding	74.5429	81.4076	135.392	99.2081	95.8627	96.2787	130.652	173.97	125.724
ENSG00000144579,7	CTDSP1	protein_coding	44.6121	46.3155	42.9949	50.4472	43.8155	58.1999	52.3626	50.7034	57.5766
ENSG00000129055,12	ANAPC13	protein_coding	52.2285	49.2253	68.3282	61.6595	62.1349	68.0715	67.2511	85.7156	73.1392
ENSG00000205476,8	CCDC85C	protein_coding	10.1377	10.1681	8.71903	5.88129	6.98018	9.82689	6.00366	5.35065	8.06541
ENSG00000033030,13	ZCCHC8	protein_coding	19.5807	19.0856	18.9853	17.6554	18.1998	17.867	16.6108	11.7689	14.9675
ENSG00000124177,14	CHD6	protein_coding	27.2472	24.4927	13.2008	17.6853	16.646	13.0436	13.6499	5.94884	17.3624
ENSG00000229637,3	PRAC2	protein_coding	31.6316	23.4426	51.5705	33.8547	38.9007	38.9522	51.7853	73.6143	50.2295
ENSG00000214253,8	FIS1	protein_coding	244.672	262.522	350.681	253.25	268.407	314.865	346.571	487.03	352.269
ENSG00000137434,11	C6orf52	protein_coding	14.7201	15.3573	27.8842	20.8667	26.1886	24.1703	34.0369	39.9448	26.0579
ENSG00000169599,12	NFU1	protein_coding	52.8004	54.1073	77.2359	65.7932	69.9862	71.2557	67.9993	92.8189	95.542
ENSG00000159461,14	AMFR	protein_coding	64.4849	56.3234	32.4945	70.8214	61.6886	79.399	77.9616	58.3393	73.1007
ENSG00000163545,8	NUAK2	protein_coding	2.30625	1.48984	1.85582	2.97409	2.7616	3.27044	2.77926	2.43736	2.9056
ENSG00000140464,19	PML	protein_coding	11.3859	13.5783	9.25332	14.9759	14.2695	15.3493	14.2889	13.2422	15.2082
ENSG00000213920,8	MDP1	protein_coding	16.0265	21.3231	25.0658	20.6735	19.5966	24.4586	29.7854	36.1322	27.595
ENSG00000131037,14	EPS8L1	protein_coding	6.26295	10.8217	11.6923	13.8247	12.3758	11.5338	11.7534	25.4294	15.747
ENSG00000121851,12	POLR3GL	protein_coding	47.3588	43.0956	58.8303	41.7305	38.7387	43.3509	61.7754	62.29	66.8849
ENSG00000104886,11	PLEKHJ1	protein_coding	92.3022	90.1664	115.279	101.791	113.372	149.398	122.358	168.271	120.986
ENSG00000182040,8	USH1G	protein_coding	0	0.102683	0	0.150574	0.08327	0.127518	0.251423	0.152466	0.314678
ENSG00000170006,11	TMEM154	protein_coding	3.07154	3.79521	3.01796	7.68251	5.1737	3.49209	2.82143	0.988582	1.22831
ENSG00000066248,14	NGEF	protein_coding	2.24722	2.3903	1.33353	3.12992	2.37561	2.89623	4.51912	2.03662	4.02245
ENSG00000224592,5	AL139158,2	lincRNA	2.76487	01,02,9348	4.44186	2.62222	4.70897	4.95028	6.23314	8.16879	8.94504
ENSG00000066084,12	DIP2B	protein_coding	37.0454	40.1571	23.0875	33.6127	32.0791	30.6061	26.2575	15.2433	25.5391
ENSG00000149929,15	HIRIP3	protein_coding	26.5178	26.69	36.9269	38.1052	35.3801	39.0347	40.3189	44.7107	35.8645
ENSG00000204922,4	UQCC3	protein_coding	11.1439	14.2393	15.8528	12.1881	16.0403	18.0782	18.7624	28.5213	15.7052
ENSG00000165572,7	KBTBD6	protein_coding	13.6739	12.8093	10.29	16.9922	17.255	17.1278	15.0409	12.0659	17.877
ENSG00000145354,11	CISD2	protein_coding	43.6005	44.4175	52.5942	56.2652	53.821	54.0138	53.7458	71.1709	58.0783
ENSG00000134202,10	GSTM3	protein_coding	79.5126	93.9637	117.903	82.5462	90.6605	99.8059	117.875	162.157	122.831
ENSG00000116151,13	MORN1	protein_coding	8.50158	10.2898	8.03035	5.451	5.77437	7.8088	5.96355	5.27581	5.79292
ENSG00000263002,7	ZNF234	protein_coding	7.91999	6.8875	6.69013	7.70072	8.68434	6.644	5.52815	3.70473	5.50584
ENSG00000234771,3	SLC25A25-AS1	antisense	1.40475	1.83447	1.89957	1.46972	1.59037	1.50177	1.39023	0.791049	0.989252
ENSG00000108387,14	SEPT4	protein_coding	3.39409	4.23056	4.41061	4.59217	5.01364	5.26627	6.17751	5.39817	6.5582
ENSG00000229833,9	PET100	protein_coding	63.9274	91.2704	130.053	104.252	99.5459	90.8359	114.218	245.598	119.757
ENSG00000133422,12	MORC2	protein_coding	46.0318	45.0481	39.2917	58.5566	54.8923	55.5752	49.9017	47.9239	51.3632
ENSG00000179304,16	FAM156B	protein_coding	10.5745	10.7921	16.4398	15.5806	7.29807	16.5996	18.5116	21.6203	20.1476
ENSG00000243444,7	PALM2	protein_coding	1.39584	0.590437	0.236733	0.808023	0.748621	0.509664	0	0.095723	0.370983
ENSG00000275496,4	CU633906,1	lincRNA	6.94694	4.96304	8.50835	9.20816	1.54932	6.08503	2.1689	0.737589	0
ENSG00000156261,12	CCT8	protein_coding	319.109	336.46	323.45	358.034	355.103	379.758	350.767	443.322	395.01
ENSG00000240694,8	PNMA2	protein_coding	105.59	95.7035	85.5138	93.5595	90.2964	93.9183	80.657	63.65	83.6731
ENSG00000169813,16	HNRNPF	protein_coding	243.359	226.057	251.129	219.57	242.097	243.911	204.713	150.794	207.959
ENSG00000197380,10	DACT3	protein_coding	52.2926	49.0173	43.5436	26.3426	27.9071	30.3669	38.0513	34.8741	40.9067
ENSG00000280269,1	AP000577,1	TEC	0.751013	1.57017	0.434121	1.04624	0.425074	0	0	0	0.14654
ENSG00000226200,6	SGMS1-AS1	antisense	1.03998	1.98674	0.368993	0.70429	0.668656	0.595057	0.566557	0.353368	0.556114
ENSG00000140264,19	SERF2	protein_coding	612.865	669.736	990.718	606.658	684.188	697.586	913.371	1449.5	935.536
ENSG00000169855,19	ROBO1	protein_coding	69.0398	62.3402	47.912	53.231	47.4211	44.2469	45.44	24.4621	50.6877
ENSG00000111203,12	ITFG2	protein_coding	14.2617	17.0677	13.766	14.4004	15.0114	14.337	11.2793	01,09,9141	11.3009
ENSG00000206560,11	ANKRD28	protein_coding	25.7195	25.7262	17.9197	22.2422	21.4503	20.9296	15.8509	12.2226	20.7499
ENSG00000076984,17	MAP2K7	protein_coding	26.7651	24.673	19.2951	19.8519	21.0923	21.6607	18.147	11.7359	20.2654
ENSG00000144840,9	RABL3	protein_coding	26.2603	20.0686	19.6411	28.0965	20.174	24.2571	15.3722	11.283	18.8424
ENSG00000168824,14	NSG1	protein_coding	3.54481	2.99272	3.62436	6.26767	7.59167	7.01367	3.90622	5.42495	5.70592
ENSG00000003402,19	CFLAR	protein_coding	24.9797	29.2305	25.5046	26.3964	29.7323	31.7032	32.2464	32.1563	31.0676
ENSG00000131495,8	NDUFA2	protein_coding	64.7735	62.3572	87.4241	52.0248	57.4412	55.8657	91.5343	119.193	86.6182
ENSG00000205363,5	INSYN1	protein_coding	2.53063	5.62464	4.60677	6.51815	5.62295	6.85593	8.77085	4.74117	7.94754
ENSG00000099624,7	ATP5F1D	protein_coding	90.8295	118.3	156.439	84.1754	94.3515	117.453	139.893	300.897	149.937
ENSG00000246859,2	STARD4-AS1	antisense	0.093371	0.064582	0.075091	0.056961	0	0.020076	0	0	0
ENSG00000279283,1	AC131009,4	TEC	1.79089	0.827995	0.337437	1.31415	0.48855	0.349118	0.245385	0	0.315015
ENSG00000171094,17	ALK	protein_coding	1.07326	1.58976	0.902445	0.856508	0.895023	1.15395	0.543967	0.640683	0.742588
ENSG00000011009,10	LYPLA2	protein_coding	36.5573	36.253	46.2308	44.2342	42.3667	55.8536	50.8166	60.2817	47.5136
ENSG00000235217,6	TSPY26P	transcribed_processed_pseudogene	11.0977	11.2844	8.99522	12.5989	13.1947	14.2738	12.2162	10.9776	15.0425
ENSG00000197965,11	MPZL1	protein_coding	100.639	97.129	79.7283	88.6396	89.2484	81.4862	73.8164	51.3136	81.6659
ENSG00000189043,9	NDUFA4	protein_coding	267.917	319.585	464.243	372.863	314.415	388.146	399.954	775.534	440.958
ENSG00000168286,2	THAP11	protein_coding	29.6008	30.7925	31.6717	33.2992	32.7655	38.5897	35.1525	45.0604	36.9224
ENSG00000145425,9	RPS3A	protein_coding	1595.71	1619.69	2039.34	1748.25	1805.51	1942.31	1989.91	2933.48	2106.09
ENSG00000114120,12	SLC25A36	protein_coding	96.7607	84.5894	57.1526	65.5923	57.3405	67.3545	54.8275	47.6121	65.395
ENSG00000280287,1	AC131212,3	TEC	1.05273	0.714113	0.498167	0.427714	0.416933	0.718735	0.233185	0.163751	0.501252
ENSG00000169762,16	TAPT1	protein_coding	15.7007	14.4715	20.2496	17.8692	13.4321	17.1621	12.8458	10.0435	11.9895
ENSG00000245888,6	FLJ21408	antisense	0.694699	0.622519	0.777758	0.253502	0.786078	0.589118	0.039279	0.152839	0.281838
ENSG00000241506,1	PSMC1P1	processed_pseudogene	29.1442	19.0262	22.2499	20.4027	22.0627	14.7831	10.854	2.50503	19.1719
ENSG00000263280,1	AC003965,1	lincRNA	1.10332	1.8018	1.79109	1.73746	2.30095	1.40767	4.58602	4.42098	3.46901
ENSG00000277142,1	LINC00235	lincRNA	2.19168	1.51852	1.34487	1.03476	1.14049	1.25445	1.10081	0.64181	0.56451
ENSG00000234327,7	AC012146,1	processed_transcript	36.3786	29.1389	48.5287	40.1946	34.4857	41.456	53.2305	92.673	43.9016
ENSG00000129595,12	EPB41L4A	protein_coding	0.24837	0.661833	0.304423	1.1572	0.165126	0.261024	2.20632	0.113558	2.88444
ENSG00000101333,16	PLCB4	protein_coding	0.822017	1.19737	1.05102	0.614605	0.406196	0.860212	0.548244	0.468863	0.566009
ENSG00000134030,13	CTIF	protein_coding	6.66336	6.38682	5.12505	3.48841	5.49811	3.13263	3.53163	4.19889	3.21726
ENSG00000013375,15	PGM3	protein_coding	16.9484	11.6347	11.6456	9.00512	10.1173	10.4217	11.5854	6.46399	8.95213
ENSG00000103978,15	TMEM87A	protein_coding	47.624	51.713	38.7986	57.3502	58.6348	60.7919	53.5395	51.591	56.7731
ENSG00000137038,7	DMAC1	protein_coding	12.2185	17.878	17.8507	14.2454	16.8223	15.3073	21.0579	35.8626	18.0714
ENSG00000126107,14	HECTD3	protein_coding	20.0496	23.2802	21.7128	27.9622	23.9976	28.6337	28.2403	22.4511	27.7408
ENSG00000154305,16	MIA3	protein_coding	29.7959	31.6505	24.184	40.99	38.1475	37.116	23.6988	13.3771	23.2242
ENSG00000198804,2	MT-CO1	protein_coding	9010.13	7560.45	14223	6792.72	7338.17	6192.38	7260.92	6385.32	6659.4
ENSG00000079785,14	DDX1	protein_coding	97.6745	103.677	103.966	119.508	117.852	115.641	113.426	117.841	121.755
ENSG00000170540,14	ARL6IP1	protein_coding	284.878	301.348	303.54	283.927	271.408	281.312	332.37	423.911	344.233
ENSG00000177283,7	FZD8	protein_coding	18.9464	20.0286	16.2547	13.8609	12.8375	15.2261	13.7306	13.3463	14.833
ENSG00000101608,12	MYL12A	protein_coding	38.9719	41.7959	69.4814	56.7644	63.1592	58.0256	69.3629	73.9423	70.8777
ENSG00000184164,14	CRELD2	protein_coding	39.8052	43.5806	46.4714	31.6309	32.0043	39.9189	49.5732	71.0964	53.4256
ENSG00000184659,5	FOXD4L4	protein_coding	0.238587	0.420756	0.08155	0.143982	0.138605	0.379623	0.046392	0	0
ENSG00000004779,9	NDUFAB1	protein_coding	129.195	116.359	197.378	153.296	161.729	142.464	189.694	285.607	179.505
ENSG00000133619,17	KRBA1	protein_coding	25.9188	39.8608	29.707	17.6385	20.8638	20.8661	16.3523	21.5695	25.4818
ENSG00000154803,12	FLCN	protein_coding	20.2318	20.7861	15.515	17.7825	15.5513	16.9271	15.1906	9.71152	15.0705
ENSG00000091513,15	TF	protein_coding	2.39002	1.05723	1.96078	1.56056	1.3886	1.41548	0.828201	1.16541	0.749912
ENSG00000188385,11	JAKMIP3	protein_coding	0.41291	0.480534	0.48982	0.726409	0.575101	0.491817	0.160126	0.167416	0.300322
ENSG00000084234,17	APLP2	protein_coding	683.446	676.463	681.932	705.628	715.605	756.878	747.124	735.611	790.648
ENSG00000111678,10	C12orf57	protein_coding	268.437	300.868	416.389	263.291	301.964	340.166	404.796	546.524	416.843
ENSG00000123297,17	TSFM	protein_coding	39.2627	40.5435	44.9418	41.3311	56.2455	51.406	48.2311	59.0871	54.9232
ENSG00000146731,10	CCT6A	protein_coding	390.376	405.636	433.65	447.356	461.265	468.01	452.387	542.776	489.11
ENSG00000163931,15	TKT	protein_coding	272.212	251.431	247.189	338.175	341.15	376.677	306.228	248.138	310.745
ENSG00000177425,10	PAWR	protein_coding	0	0.038444	0.019159	0.713775	0.566605	0.035883	0	0.29473	0.295072
ENSG00000180229,12	HERC2P3	transcribed_unprocessed_pseudogene	22.438	22.5582	18.9074	23.6514	16.9635	22.1744	17.3919	11.9236	12.9394
ENSG00000106976,20	DNM1	protein_coding	211.072	203.496	120.663	131.29	167.379	140.731	127.596	82.1076	145.122
ENSG00000166033,12	HTRA1	protein_coding	76.269	80.2657	89.6596	75.2674	74.6467	82.6952	92.4509	101.595	103.027
ENSG00000204264,9	PSMB8	protein_coding	26.6015	36.4656	39.3317	35.028	34.1485	40.8476	46.4654	61.0302	38.8045
ENSG00000258920,1	FOXN3-AS1	antisense	2.74085	3.34436	2.33104	2.19418	2.9322	2.83768	4.13438	5.5251	5.16127
ENSG00000257056,2	LINC02282	lincRNA	1.89684	2.47204	1.54902	2.15607	2.65266	1.25695	1.2996	0.60427	0.400534
ENSG00000148290,9	SURF1	protein_coding	49.1283	44.1798	55.2777	44.9036	53.3669	45.4572	64.064	65.8605	59.5966
ENSG00000255639,3	AC005833,1	protein_coding	3.17344	4.56309	4.70636	9.82413	7.86257	5.90968	4.56603	11.8747	5.49802
ENSG00000138336,8	TET1	protein_coding	11.8414	11.5199	5.30176	7.85327	7.44127	6.40459	7.15741	3.28081	6.39286
ENSG00000104129,9	DNAJC17	protein_coding	47.5409	45.8648	54.3496	41.9926	54.3218	51.3789	60.2549	62.282	66.3836
ENSG00000169188,4	APEX2	protein_coding	11.2587	11.03	14.9366	16.9021	17.9743	18.0884	15.783	13.4494	19.9898
ENSG00000153404,14	PLEKHG4B	protein_coding	0	0.009212	0	0.051478	0.008194	0.017499	0.015051	0.172447	0.02532
ENSG00000101150,17	TPD52L2	protein_coding	40.9465	40.8872	42.1685	44.1098	47.2242	51.1888	48.0777	47.2783	48.7675
ENSG00000134569,9	LRP4	protein_coding	38.0429	39.1734	34.1021	35.9054	39.786	36.972	43.8175	36.314	46.7846
ENSG00000196705,8	ZNF431	protein_coding	14.7685	11.8058	9.78767	11.0263	10.5853	11.6108	10.4405	6.85292	8.34413
ENSG00000151552,11	QDPR	protein_coding	38.9983	33.1855	46.7255	38.8342	44.5955	48.2991	50.0513	60.5908	47.9896
ENSG00000205810,8	KLRC3	protein_coding	5.81603	7.76901	8.36448	4.5881	4.97472	5.8736	4.80109	2.13679	4.187
ENSG00000151883,17	PARP8	protein_coding	18.625	18.8635	17.8957	16.3951	16.7006	18.4996	15.4814	9.46625	15.5428
ENSG00000267284,1	AC022031,2	lincRNA	0	0	0	0.970496	1.02005	0.621867	0.277658	1.27247	1.07645
ENSG00000111788,10	AC009533,1	unprocessed_pseudogene	01,05,2864	6.66498	4.68465	6.13141	4.96981	4.97219	3.90086	3.27266	3.83662
ENSG00000132676,15	DAP3	protein_coding	106.251	101.95	121.923	132.781	127.973	127.011	132.673	152.496	126.854
ENSG00000130638,16	ATXN10	protein_coding	211.359	212.294	235.249	233.176	214.99	240.342	247.989	245.58	271.566
ENSG00000137364,4	TPMT	protein_coding	4.43194	4.82392	5.03775	5.05492	5.53958	6.25152	5.88912	6.42935	6.4841
ENSG00000127481,14	UBR4	protein_coding	52.7389	58.4276	45.8733	69.0926	60.4468	59.2016	52.2326	68.3802	78.3865
ENSG00000144290,16	SLC4A10	protein_coding	0.323567	0.323604	0.222524	0.157324	1.0223	0.099889	0.017492	0.054647	0.060102
ENSG00000151067,21	CACNA1C	protein_coding	0	0.025918	0.008633	0.007639	0	0.016134	0.035683	0.016565	0.369398
ENSG00000179915,22	NRXN1	protein_coding	0.031381	0.036847	0.062955	0	0	0.143626	0.055955	0.733274	0.474335
ENSG00000138750,14	NUP54	protein_coding	62.0623	53.8551	53.901	55.8737	56.4416	45.3993	42.5063	38.5273	47.126
ENSG00000168772,10	CXXC4	protein_coding	8.44975	8.02321	4.90594	6.46747	7.2167	5.79143	5.59769	3.32659	4.85501
ENSG00000273763,2	AC007318,2	transcribed_processed_pseudogene	0.715012	0.600598	0.658227	1.31749	0.584626	0.557963	0.587696	5.56704	0.753646
ENSG00000124635,8	HIST1H2BJ	protein_coding	38.3793	42.1182	16.4538	18.2191	23.626	25.4887	18.5983	12.5204	18.6203
ENSG00000164306,10	PRIMPOL	protein_coding	21.4323	20.4056	23.4046	26.0668	26.928	24.4105	24.609	30.3208	28.6172
ENSG00000182481,8	KPNA2	protein_coding	228.759	243.358	246.305	244.553	244.427	237.285	268.507	382.769	275.279
ENSG00000112514,15	CUTA	protein_coding	154.371	185.874	269.277	178.791	188.338	211.253	237.069	430.053	253.91
ENSG00000188215,9	DCUN1D3	protein_coding	3.96304	3.03642	2.17393	5.80972	5.64016	4.62747	5.1023	2.99699	5.24532
ENSG00000122574,10	WIPF3	protein_coding	1.15573	0.930843	0.860641	0.319156	0.597466	0.197009	0.532177	0.36545	0.357824
ENSG00000172590,18	MRPL52	protein_coding	96.2859	98.4422	157.399	126.132	123.137	126.797	156.486	244.351	133.578
ENSG00000064309,14	CDON	protein_coding	9.26757	7.68681	5.28238	4.31563	5.21062	6.57077	5.87877	2.69156	4.82959
ENSG00000157502,13	MUM1L1	protein_coding	3.18073	3.36262	2.45717	1.99171	1.61129	1.42412	2.14598	1.65451	1.78823
ENSG00000107518,17	ATRNL1	protein_coding	2.58543	2.19402	1.96956	1.52933	1.40349	0.996469	1.16704	0.684791	1.36138
ENSG00000163156,11	SCNM1	protein_coding	39.5805	52.4277	57.3904	54.7411	60.959	58.543	65.2911	68.0017	62.8621
ENSG00000101367,8	MAPRE1	protein_coding	110.443	111.926	118.493	125.149	119.097	122.825	132.132	132.704	130.104
ENSG00000262814,7	MRPL12	protein_coding	109.996	111.896	129.875	118.417	117.275	143.169	132.821	183.775	143.365
ENSG00000178980,14	SELENOW	protein_coding	210.254	248.531	311.52	204.283	217.409	260.778	285.154	521.059	318.323
ENSG00000090905,18	TNRC6A	protein_coding	36.0832	34.2722	23.3422	39.6556	41.0387	38.5299	25.2993	16.5556	24.8803
ENSG00000260578,1	AC110597,1	lincRNA	2.55477	2.74463	1.73345	2.3448	2.44531	1.90741	1.67193	0.958651	1.35718
ENSG00000267128,1	RNF157-AS1	antisense	2.60802	3.2125	4.68731	2.34392	1.40401	2.70131	8.0216	4.59092	8.33878
ENSG00000001497,16	LAS1L	protein_coding	35.9884	30.0384	34.1908	28.1977	26.9031	32.1576	27.2357	22.374	27.2156
ENSG00000119632,3	IFI27L2	protein_coding	18.6334	25.0766	32.7175	15.6117	17.7725	14.6245	38.1641	53.4406	33.5667
ENSG00000128606,12	LRRC17	protein_coding	37.0871	38.8803	44.075	24.7443	25.906	24.4819	28.182	30.3333	30.1959
ENSG00000130433,7	CACNG6	protein_coding	1.89442	1.26092	1.1166	1.28542	1.02293	1.04022	1.99855	2.56985	3.16094
ENSG00000171492,14	LRRC8D	protein_coding	23.5807	22.8392	16.7497	23.9103	21.7344	22.4946	16.8423	11.8826	16.9927
ENSG00000197448,13	GSTK1	protein_coding	120.238	136.657	172.345	114.821	136.058	138.532	172.584	225.432	175.72
ENSG00000119041,10	GTF3C3	protein_coding	29.468	22.2997	17.754	32.5382	25.2655	23.8901	17.6106	13.4254	16.1161
ENSG00000008128,22	CDK11A	protein_coding	26.5579	32.9007	37.4033	22.6544	29.4582	25.9808	25.9902	16.9272	24.0482
ENSG00000088448,14	ANKRD10	protein_coding	162.921	161.131	113.444	137.512	138.822	148.726	116.054	91.7825	117.635
ENSG00000196839,12	ADA	protein_coding	58.7889	59.1521	62.8122	49.0037	50.3925	53.8635	68.5062	75.1785	72.2754
ENSG00000170049,9	KCNAB3	protein_coding	6.80021	6.41866	7.45016	5.39535	4.03426	6.79455	3.30219	4.15569	4.94793
ENSG00000258643,5	BCL2L2-PABPN1	protein_coding	14.2098	8.81685	10.3804	9.07434	5.56001	12.7911	8.36666	2.70476	4.86649
ENSG00000213123,10	TCTEX1D2	protein_coding	42.5345	38.6565	74.1843	58.0724	57.8078	57.7748	66.6583	92.0566	76.8609
ENSG00000260236,1	AC099778,1	antisense	1.90269	1.55578	1.98799	2.01054	1.53648	1.31867	0.661718	0.599226	1.30184
ENSG00000143379,12	SETDB1	protein_coding	30.263	32.2335	27.544	27.7822	28.5383	24.514	22.2541	21.7486	24.8144
ENSG00000141664,9	ZCCHC2	protein_coding	7.16379	7.82342	3.7393	5.41416	4.50472	7.05417	3.24881	3.37674	4.51053
ENSG00000186283,13	TOR3A	protein_coding	16.2107	16.8737	19.9708	21.9032	21.6521	24.9153	20.3666	23.284	23.2592
ENSG00000063177,12	RPL18	protein_coding	1128.2	1186.58	1824.68	1172.61	1364.96	1449.11	1670.8	2509.64	1720.53
ENSG00000104427,11	ZC2HC1A	protein_coding	11.3582	13.3352	13.9547	10.7869	14.5049	10.5927	9.86122	6.87212	10.0126
ENSG00000275023,4	MLLT6	protein_coding	33.7493	37.4747	27.0012	29.4611	30.3911	32.0173	25.0422	15.2447	29.1074
ENSG00000164329,13	TENT2	protein_coding	30.0002	32.627	24.7226	26.838	26.7941	23.7682	23.2377	20.0231	22.0385
ENSG00000106268,15	NUDT1	protein_coding	147.739	142.182	219.645	166.347	185.847	183.448	222.542	250.011	214.063
ENSG00000136450,12	SRSF1	protein_coding	313.461	311.987	312.2	309.113	308.665	320.201	252.904	248.031	257.567
ENSG00000117691,9	NENF	protein_coding	54.6696	59.1884	78.6191	50.5493	65.9028	76.2217	82.6376	102.52	81.6121
ENSG00000085063,15	CD59	protein_coding	202.935	224.21	241.885	213.98	218.752	229.062	263.171	258.388	263.607
ENSG00000184787,18	UBE2G2	protein_coding	109.287	107.693	79.031	117.043	107.373	107.595	81.9115	55.0435	80.9589
ENSG00000172409,5	CLP1	protein_coding	11.287	10.7145	13.8245	16.3229	16.3494	13.9338	15.0744	17.5686	15.6268
ENSG00000178177,15	LCORL	protein_coding	16.0658	14.2213	12.4945	11.5881	9.62059	10.7156	10.8006	10.5614	8.91898
ENSG00000133104,13	SPART	protein_coding	64.3525	57.3452	63.1204	59.3673	68.9048	63.0773	47.9852	41.3844	55.1681
ENSG00000114383,9	TUSC2	protein_coding	19.2618	23.7536	29.6309	26.0716	25.1178	30.9036	32.672	36.0557	30.0018
ENSG00000157881,13	PANK4	protein_coding	28.0963	32.4403	27.6502	21.9996	31.1958	31.7916	21.3902	19.6288	22.1678
ENSG00000140455,16	USP3	protein_coding	28.6576	31.9982	31.3256	32.8235	26.7164	27.6248	21.6183	21.177	26.1231
ENSG00000165209,18	STRBP	protein_coding	31.295	24.8902	23.2961	24.4541	23.0958	22.8084	19.3113	13.6187	24.0425
ENSG00000047346,12	FAM214A	protein_coding	20.4386	17.2423	15.7213	14.277	13.6266	16.2743	11.3281	11.7708	15.5427
ENSG00000125977,6	EIF2S2	protein_coding	99.1863	96.7942	99.048	138.465	139.857	129.819	105.116	109.335	125.119
ENSG00000123411,14	IKZF4	protein_coding	3.36435	4.55068	3.71996	5.03922	4.16883	5.1667	2.62666	1.79269	3.20471
ENSG00000206149,10	HERC2P9	transcribed_unprocessed_pseudogene	25.3711	26.519	25.3386	29.4181	30.979	27.8683	21.8814	16.4746	20.9219
ENSG00000151065,13	DCP1B	protein_coding	8.62559	11.8136	9.73029	13.1195	15.2739	14.9659	12.9911	11.2485	14.5334
ENSG00000196154,11	S100A4	protein_coding	5.49744	6.45402	13.4753	8.97259	7.41526	12.4925	16.3251	29.6994	9.92845
ENSG00000100577,18	GSTZ1	protein_coding	53.4008	62.7536	72.9088	40.8672	43.6704	49.3297	72.8795	102.649	78.9903
ENSG00000254004,6	ZNF260	protein_coding	32.1655	28.2955	16.474	32.1952	30.2277	24.0411	18.5298	12.4514	19.1453
ENSG00000172331,11	BPGM	protein_coding	39.2455	33.7296	40.2636	46.3276	48.3938	49.6691	43.8035	45.4954	46.5377
ENSG00000272068,1	AL365181,2	lincRNA	2.43316	2.77864	1.6879	2.81107	3.51905	2.62247	3.29263	2.68688	4.23172
ENSG00000243927,5	MRPS6	protein_coding	118.814	132.044	201.493	143.726	154.18	149.94	187.329	268.36	188.778
ENSG00000158882,14	TOMM40L	protein_coding	12.7433	12.1124	12.3322	15.0408	16.3789	16.1911	15.2999	17.4143	14.0986
ENSG00000164587,12	RPS14	protein_coding	1310.51	1568.97	1957.94	1440.19	1649.66	1723.83	1877.97	2725.71	1978.46
ENSG00000283103,1	AC010642,2	antisense	3.38748	2.91932	4.54354	2.05689	3.97459	3.24736	4.88991	7.34219	5.44975
ENSG00000164683,16	HEY1	protein_coding	18.2257	23.0292	20.262	21.8957	20.8011	22.1191	13.4327	16.0641	13.6591
ENSG00000143437,20	ARNT	protein_coding	20.0827	21.7195	16.745	18.6392	18.3659	17.1969	15.4563	11.7257	16.7948
ENSG00000146063,19	TRIM41	protein_coding	23.4561	24.3904	21.4583	20.3194	20.0391	23.3006	18.7868	15.2955	20.0944
ENSG00000175895,3	PLEKHF2	protein_coding	9.76951	11.2525	8.22874	10.3365	10.1014	12.1501	11.459	11.1009	14.1833
ENSG00000242616,3	GNG10	protein_coding	99.9308	104.926	123.566	105.068	103.339	97.4605	120.586	179.933	134.391
ENSG00000145348,16	TBCK	protein_coding	23.9745	22.0106	20.7754	11.2843	15.8691	13.1426	17.8433	14.7687	16.3781
ENSG00000198648,10	STK39	protein_coding	26.0586	26.3146	21.4577	22.2635	24.3881	23.0371	30.2295	26.5629	28.9542
ENSG00000066379,14	ZNRD1	protein_coding	29.4757	22.2438	36.7767	23.8765	27.5949	25.5282	37.7465	46.499	40.8473
ENSG00000140262,17	TCF12	protein_coding	204.473	194.745	157.649	197.592	196.101	191.776	161.668	110.23	154.032
ENSG00000125753,13	VASP	protein_coding	33.8399	35.2721	34.742	42.2386	34.3792	37.8999	40.4947	48.8543	40.6577
ENSG00000163823,3	CCR1	protein_coding	1.57756	1.72969	1.79157	1.19885	0.701431	1.10105	1.07695	0.607115	0.951471
ENSG00000198753,11	PLXNB3	protein_coding	49.6994	56.8106	55.6139	46.9737	49.9149	56.2896	62.549	82.6592	62.0377
ENSG00000254505,9	CHMP4A	protein_coding	56.8846	60.0115	85.4844	62.1247	72.1022	61.8991	87.5257	107.455	83.9012
ENSG00000138029,13	HADHB	protein_coding	53.3128	56.9244	63.637	53.6578	55.5824	60.46	67.9287	73.5528	69.3373
ENSG00000184281,14	TSSC4	protein_coding	28.9569	29.877	30.696	27.9882	26.8512	38.8501	36.412	52.6214	35.1328
ENSG00000091947,9	TMEM101	protein_coding	19.6947	21.6094	24.0948	19.2333	24.6022	27.6303	25.5113	32.633	29.3984
ENSG00000159131,16	GART	protein_coding	161.123	178.138	152.963	197.938	175.975	179.85	141.521	99.8365	139.729
ENSG00000259330,2	INAFM2	protein_coding	24.9389	22.2076	22.5155	20.4567	26.9648	27.7572	28.3146	31.7853	27.2565
ENSG00000197119,12	SLC25A29	protein_coding	81.4081	85.5716	84.8611	53.6748	60.1527	66.9324	66.7844	63.147	65.9445
ENSG00000243678,11	NME2	protein_coding	423.431	455.902	702.042	528.832	571.119	574.912	619.365	911.623	689.146
ENSG00000259399,1	TGIF2-RAB5IF	protein_coding	0	2.73653	1.39769	3.3379	2.87642	1.39958	3.11031	3.1954	7.2937
ENSG00000154864,12	PIEZO2	protein_coding	0	0.028404	0	0	0	0	0.526944	0.222658	0.105573
ENSG00000125257,14	ABCC4	protein_coding	5.96326	7.19539	4.0965	4.95226	4.50738	3.96349	4.51255	2.48311	4.02228
ENSG00000031691,6	CENPQ	protein_coding	26.0061	26.8456	26.3668	32.6738	33.9891	30.3728	32.7872	26.9514	34.6229
ENSG00000067177,14	PHKA1	protein_coding	11.6143	11.5637	9.48528	7.58298	7.38808	6.97923	9.02958	6.05148	9.03503
ENSG00000139579,12	NABP2	protein_coding	64.1039	63.6863	81.0492	70.1306	77.4413	83.0066	88.3086	76.9065	91.2499
ENSG00000175197,12	DDIT3	protein_coding	31.5893	25.7972	40.4623	20.712	24.8835	21.5695	19.1666	23.4742	19.8143
ENSG00000196405,12	EVL	protein_coding	98.0807	94.2072	102.845	78.6995	82.9337	80.4356	79.1901	74.6295	81.1362
ENSG00000110442,11	COMMD9	protein_coding	36.5971	33.5771	44.1595	51.8867	37.6145	47.7046	51.8446	53.3256	46.2768
ENSG00000132581,9	SDF2	protein_coding	53.7385	53.6699	81.5009	76.7359	64.9489	80.0172	84.0555	94.6947	79.2353
ENSG00000092054,12	MYH7	protein_coding	1.20312	1.08997	0.756541	1.61434	1.68863	1.72473	1.653	1.06785	1.72346
ENSG00000123154,11	WDR83	protein_coding	6.34374	8.17003	9.51738	9.94303	7.6901	01,09,9904	9.80358	12.9559	12.9195
ENSG00000214548,16	MEG3	lincRNA	93.0324	103.71	128.449	61.0171	66.0523	63.254	71.6814	84.6716	73.581
ENSG00000150459,12	SAP18	protein_coding	137.839	139.087	196.028	158.465	152.529	169.495	182.951	277.488	192.506
ENSG00000136122,15	BORA	protein_coding	18.4176	13.5843	16.1445	14.6238	12.3796	11.1998	12.0586	10.4247	11.5868
ENSG00000174231,16	PRPF8	protein_coding	147.182	152.592	91.7782	140.399	135.093	126.712	100.66	61.5056	107.103
ENSG00000143590,13	EFNA3	protein_coding	21.7574	16.5747	20.402	7.58377	12.375	8.89641	11.2286	14.1551	11.4329
ENSG00000184261,4	KCNK12	protein_coding	0.082462	0.057029	0.028419	0.016775	0.092481	0.035465	0.062095	0.237489	0.458169
ENSG00000188785,11	ZNF548	protein_coding	20.984	13.8388	12.9634	15.0012	16.1561	10.0417	11.4182	7.65275	11.3763
ENSG00000121152,9	NCAPH	protein_coding	49.831	50.2982	55.6624	68.3081	72.7685	71.8306	61.7677	58.1873	61.5679
ENSG00000100387,8	RBX1	protein_coding	73.0351	80.486	121.63	75.9779	90.4052	94.4639	118.329	158.521	113.126
ENSG00000144227,4	NXPH2	protein_coding	4.60602	2.75627	3.91076	2.73421	1.79014	2.92219	2.4655	1.12038	1.50287
ENSG00000269242,1	AC010422,3	protein_coding	0	0.768307	1.07113	1.7531	0	2.26755	1.79271	5.67794	2.84771
ENSG00000169554,19	ZEB2	protein_coding	22.1552	21.6657	13.3547	23.4129	19.7343	21.0206	14.8532	9.96142	14.5224
ENSG00000174132,8	FAM174A	protein_coding	5.00846	5.74589	7.88148	3.67785	6.34042	5.40982	8.45435	11.8616	9.71178
ENSG00000104756,15	KCTD9	protein_coding	18.358	17.8219	15.4387	15.9716	18.7324	17.8627	14.8068	9.75491	13.5341
ENSG00000183765,21	CHEK2	protein_coding	16.8661	16.8394	24.072	22.2226	22.3672	20.8319	24.7803	33.49	23.4403
ENSG00000162373,12	BEND5	protein_coding	28.6116	20.5389	42.8321	15.6473	14.4381	16.3952	19.2483	16.1422	22.8753
ENSG00000165233,17	CARD19	protein_coding	39.5602	37.4239	53.9349	30.2729	30.5243	46.6877	56.339	73.901	57.7914
ENSG00000196419,12	XRCC6	protein_coding	336.514	340.755	365.821	380.431	391.883	397.338	380.303	392.03	419.325
ENSG00000106948,16	AKNA	protein_coding	13.1883	13.1147	11.7604	13.0523	14.4647	13.4861	9.44068	7.15811	11.7778
ENSG00000176444,18	CLK2	protein_coding	62.1331	58.8462	68.5869	46.7902	48.9096	46.5114	52.4882	44.8683	49.2253
ENSG00000168792,4	ABHD15	protein_coding	9.28945	8.09782	7.63081	9.74878	8.43529	10.7615	11.0064	9.013	10.6759
ENSG00000084110,10	HAL	protein_coding	0.258617	1.44421	0	0.083205	0.035872	0	0	0	0
ENSG00000110237,4	ARHGEF17	protein_coding	20.6411	22.6627	21.0208	13.904	14.6708	19.0268	17.8338	12.0413	17.5312
ENSG00000074410,13	CA12	protein_coding	107.321	98.8685	96.7418	127.079	131.375	120.913	133.875	88.9856	146.972
ENSG00000106399,11	RPA3	protein_coding	118.604	122.049	192.311	148.971	154.663	172.362	192.557	255.738	168.217
ENSG00000244731,7	C4A	protein_coding	1.68093	4.86704	2.3941	2.44571	4.45543	4.93451	5.6137	6.70574	4.18297
ENSG00000100298,15	APOBEC3H	protein_coding	0	0	0.06911	0	0	0.206083	1.12337	0.624655	0.728366
ENSG00000177150,12	FAM210A	protein_coding	25.594	25.0041	23.655	20.8385	23.2321	17.9342	19.8885	13.9663	20.6917
ENSG00000225953,2	SATB2-AS1	antisense	35.461	40.3378	30.7648	29.5799	35.0659	42.194	52.5684	43.9079	43.4538
ENSG00000224023,10	FLJ37035	lincRNA	3.31819	1.38541	3.13347	3.54026	4.39541	3.50346	7.62554	3.75699	5.37756
ENSG00000167985,6	SDHAF2	protein_coding	30.3292	40.9599	39.3758	37.1593	29.237	38.5465	44.696	58.2482	47.4319
ENSG00000131127,13	ZNF141	protein_coding	16.8559	14.6402	9.77164	14.0167	13.7748	12.5563	9.57883	6.29444	11.1229
ENSG00000224689,9	ZNF812P	transcribed_unprocessed_pseudogene	0	0	0	0	0.062981	0	0.760171	0.245187	0.12996
ENSG00000164327,12	RICTOR	protein_coding	6.4317	5.21868	3.29084	5.66141	5.29007	4.83581	3.64912	2.70427	3.48713
ENSG00000198843,12	SELENOT	protein_coding	71.4473	76.2751	81.1466	73.057	69.3948	78.9565	92.5357	99.6161	85.8661
ENSG00000266904,5	LINC00663	lincRNA	7.91198	10.736	7.02133	9.42821	9.77873	8.56428	10.1524	15.8667	12.9057
ENSG00000104714,13	ERICH1	protein_coding	14.1182	12.9934	13.2491	9.3194	8.02248	11.6143	8.50245	8.482	10.8019
ENSG00000021776,10	AQR	protein_coding	19.0641	19.8346	19.0121	20.2969	19.8486	20.0596	16.2457	9.6355	16.8687
ENSG00000267169,1	AC022098,1	antisense	2.9112	6.39266	4.17894	6.00129	3.7246	8.99798	7.05107	8.84936	7.7173
ENSG00000069849,10	ATP1B3	protein_coding	89.3627	95.9298	121.09	120.092	116.456	117.703	108.136	132.806	151.707
ENSG00000183569,17	SERHL2	protein_coding	1.37446	1.71181	2.30293	1.20629	2.0422	2.23425	4.04628	2.31291	4.66377
ENSG00000279117,1	AP001972,5	TEC	2.51287	2.80696	2.85056	2.69687	2.27678	2.96052	4.44668	3.49203	3.97297
ENSG00000102109,8	PCSK1N	protein_coding	36.192	41.1678	49.9312	26.5725	30.7304	37.6972	51.9271	83.2769	50.1469
ENSG00000165240,19	ATP7A	protein_coding	5.50737	4.78335	2.88388	3.19524	3.09791	2.99573	3.42029	2.04697	2.99854
ENSG00000215769,8	ARHGAP27P1-BPTFP1-KPNA2P3	processed_transcript	5.06919	4.21576	3.68339	2.64277	2.76764	3.39913	2.62623	2.75223	2.50321
ENSG00000026950,16	BTN3A1	protein_coding	11.889	11.6147	8.50766	9.21137	8.3688	6.10592	7.85224	6.05612	7.45429
ENSG00000169220,17	RGS14	protein_coding	11.0582	9.91461	11.362	15.0809	12.4085	15.8132	11.9167	16.1839	15.3397
ENSG00000133872,13	SARAF	protein_coding	239.754	248.454	297.181	252.722	243.228	263.124	291.515	388.34	316.588
ENSG00000137965,10	IFI44	protein_coding	48.0685	45.2835	52.3904	36.9296	37.7345	36.8817	35.7297	36.5822	35.7024
ENSG00000131389,17	SLC6A6	protein_coding	11.8359	14.2052	12.1809	12.1795	11.1192	13.7123	10.555	6.67442	10.6471
ENSG00000115486,11	GGCX	protein_coding	28.7888	31.9334	28.2494	33.2349	29.0338	32.2232	33.668	37.9124	35.5008
ENSG00000149970,15	CNKSR2	protein_coding	4.4587	4.00359	2.60876	4.22993	2.29554	2.0595	2.01823	1.76869	2.47682
ENSG00000084207,16	GSTP1	protein_coding	593.632	629.486	1023.76	715.158	786.115	890.793	918.993	1237.47	993.722
ENSG00000104812,14	GYS1	protein_coding	46.4633	42.7242	35.183	28.7129	26.9774	31.0316	32.509	27.8802	35.5602
ENSG00000167904,14	TMEM68	protein_coding	26.9901	19.4151	26.6065	31.1556	33.8529	34.6681	32.7889	30.6534	28.8322
ENSG00000171823,6	FBXL14	protein_coding	14.2021	15.9293	10.8452	13.1127	13.3919	13.4266	11.243	5.55521	10.118
ENSG00000205903,6	ZNF316	protein_coding	56.6066	55.002	38.5511	39.1505	44.2835	52.2414	37.5858	29.8578	41.9314
ENSG00000141759,14	TXNL4A	protein_coding	149.271	140.714	176.418	146.946	142.018	171.411	177.14	268.836	182.899
ENSG00000179058,6	C9orf50	protein_coding	3.64455	3.2217	3.0654	2.33328	1.96101	2.51087	3.69261	6.92763	7.57227
ENSG00000135439,11	AGAP2	protein_coding	26.8896	21.8584	14.8636	14.83	15.255	15.7024	15.1105	9.8454	17.8898
ENSG00000128692,8	EIF2S2P4	processed_pseudogene	1.47307	0.469058	1.04965	0.750358	0	0.38252	0	0.222951	0
ENSG00000034152,18	MAP2K3	protein_coding	18.79	21.4733	18.498	17.9072	19.7334	19.7612	22.0796	23.3282	25.1768
ENSG00000163879,10	DNALI1	protein_coding	16.2339	18.5617	22.9074	22.829	23.8599	18.126	26.7425	24.5672	24.8009
ENSG00000131378,13	RFTN1	protein_coding	1.11129	1.37753	0.350454	1.35487	0.486922	0.346589	0.168808	0.324072	0.270299
ENSG00000166823,5	MESP1	protein_coding	0.691157	0.3724	0.37105	1.09916	0.388361	0.840769	2.32225	1.11359	0.489431
ENSG00000176095,11	IP6K1	protein_coding	33.7776	33.0133	25.4525	38.7835	40.8158	41.2747	34.8037	32.2239	41.2426
ENSG00000227471,8	AKR1B15	protein_coding	0.139914	0.064653	0.161033	0.113106	0.367131	0.300183	0.421695	0.55337	0.649137
ENSG00000070601,9	FRMPD1	protein_coding	0.417019	0.216355	0.359371	0.08477	0.097463	0.044826	0.137394	0.045972	0.120508
ENSG00000170004,16	CHD3	protein_coding	71.279	68.2013	41.6606	50.6209	52.6923	57.2652	44.6804	35.4158	48.4538
ENSG00000165169,10	DYNLT3	protein_coding	42.186	40.9822	48.6855	47.4827	48.1943	49.0947	52.0561	52.8265	52.6035
ENSG00000245532,8	NEAT1	lincRNA	74.5626	78.6818	89.0993	47.6118	50.8391	52.4985	55.9287	65.4149	56.917
ENSG00000115419,12	GLS	protein_coding	127.889	108.15	92.3996	88.3016	103.589	95.6171	95.3384	70.0862	81.3266
ENSG00000241685,9	ARPC1A	protein_coding	288.58	286.831	378.79	339.743	325.989	341.103	361.231	478.845	390.465
ENSG00000121621,6	KIF18A	protein_coding	25.6108	25.8676	22.1272	24.3246	24.7566	22.2852	17.3805	16.8029	22.1022
ENSG00000177398,18	UMODL1	protein_coding	0.051534	0	0.011287	0	0	0	0.533399	0.112312	0.415077
ENSG00000134970,13	TMED7	protein_coding	66.7338	58.3572	57.4906	58.3274	50.7989	57.3961	54.5661	39.2621	47.1056
ENSG00000166446,14	CDYL2	protein_coding	0.077999	0.67557	0.057335	0.127019	0.02332	0.107369	0.035238	0.018365	0.084079
ENSG00000108861,8	DUSP3	protein_coding	18.0691	19.5692	17.6798	18.0327	17.9279	17.9657	21.139	21.4657	21.6356
ENSG00000234546,3	LNCTAM34A	lincRNA	1.70444	0.449819	1.53383	2.49256	2.59224	2.30037	3.16883	3.96562	1.78232
ENSG00000162601,9	MYSM1	protein_coding	19.5041	25.9181	15.1502	18.0698	18.8777	14.3798	16.0883	9.98278	14.7456
ENSG00000163346,16	PBXIP1	protein_coding	26.4432	25.1659	23.8186	15.2188	17.2416	16.0219	20.5058	17.8692	20.6827
ENSG00000109771,15	LRP2BP	protein_coding	1.83588	1.37604	1.33068	0.982443	0.953747	0.405365	0.485493	0.863301	0.718516
ENSG00000180376,16	CCDC66	protein_coding	17.0872	17.0959	15.8135	23.1202	17.1926	14.2539	13.0043	6.9434	12.8288
ENSG00000187135,7	VSTM2B	protein_coding	6.53654	5.59726	6.20477	1.72878	2.19765	2.34135	3.82393	3.92663	2.87293
[truncated: 56,296 more rows]
