# Supplementary material for: The Nitro Group Reshapes the Effects of Pyrido[3,4-g]quinazoline Derivatives on DYRK/CLK Activity and RNA Splicing in Glioblastoma Cells
Source: Cancers (Basel). 2024 Feb 19;16(4):834. doi: 10.3390/cancers16040834 (PMC10886777; doi:10.3390/cancers16040834)
Supplement: Supplementary file 1 [file cancers-16-00834-s001.zip › Supporting Table S5.xlsx]

## Sheet: AS
Supporting Table 5 (Related to Figure 7). RNAseq analysis of alternative RNA splicing in control GBM cells or GBM cells treated for 6 or 24 hours with 2.
Event coordinates	Event Type	GeneID	Gene Name	Chromosome	FDR_control_2-6h	IncLevelDifference_control_2-6h	FDR_control_2-24h	IncLevelDifference_control_2-24h	FDR_2-6h_2-24h	IncLevelDifference_2-6h_2-24h
AC010522,1_ 57856103_ 57856233_ 57856106_ 57856233_ 57820493_ 57820549	A3	ENSG00000268750,6	AC010522,1	chr19	0.0175485	-0.389	0.0406699	-0.276	0.624054	0.113
ACTR8_ 53873031_ 53873146_ 53873031_ 53873127_ 53875947_ 53876080	A3	ENSG00000113812,13	ACTR8	chr3	0.00477799	0.667	NA	NA	1	-0.667
ADAMTS10_ 8589451_ 8589585_ 8589451_ 8589574_ 8589888_ 8589991	A3	ENSG00000142303,13	ADAMTS10	chr19	2.78874e-05	-0.373	1	-0.068	0.00142076	0.305
AKAP10_ 19962839_ 19963022_ 19962839_ 19962991_ 19968413_ 19968461	A3	ENSG00000108599,14	AKAP10	chr17	0.0107942	-0.232	0.00521155	-0.254	1	-0.021
ALKBH6_ 36010737_ 36011077_ 36010737_ 36011045_ 36011403_ 36011464	A3	ENSG00000239382,10	ALKBH6	chr19	0.014911	0.105	1	0.032	0.0732131	-0.073
ARSE_ 2960377_ 2960468_ 2960377_ 2960420_ 2964223_ 2964264	A3	ENSG00000157399,14	ARSE	chrX	0.0145092	0.368	0.00177752	0.388	1	0.02
AURKB_ 8207737_ 8207901_ 8207737_ 8207840_ 8210529_ 8210581	A3	ENSG00000178999,12	AURKB	chr17	0.00593479	0.195	0.957608	0.132	0.0950262	-0.063
BAZ2B_159448241_159448409_159448241_159448403_159478574_159478721	A3	ENSG00000123636,17	BAZ2B	chr2	0.000414601	0.545	1	0.174	1	-0.371
CCDC138_108804888_108805008_108804891_108805008_108798427_108798586	A3	ENSG00000163006,11	CCDC138	chr2	0.00733609	0.14	0.000225887	0.231	0.812318	0.091
CCNL2_ 1390765_ 1392803_ 1390765_ 1390865_ 1393395_ 1393460	A3	ENSG00000221978,11	CCNL2	chr1	0.0216337	0.242	1	0.098	0.475275	-0.143
CELF2_ 11321188_ 11321386_ 11321206_ 11321386_ 11314138_ 11314258	A3	ENSG00000048740,18	CELF2	chr10	0.0180177	0.147	1	0.067	0.0798922	-0.08
CEP192_ 13038369_ 13038579_ 13038514_ 13038579_ 13037236_ 13037301	A3	ENSG00000101639,18	CEP192	chr18	0.0300386	0.151	NA	NA	0.0269721	-0.151
CHRDL1_110721384_110721530_110721384_110721527_110759660_110759754	A3	ENSG00000101938,14	CHRDL1	chrX	0.00518726	-0.194	0.954775	-0.03	0.314773	0.164
CRBN_ 3175162_ 3175269_ 3175162_ 3175266_ 3179620_ 3179710	A3	ENSG00000113851,14	CRBN	chr3	0.036023	-0.107	0.0817891	-0.093	1	0.014
D2HGDH_241743621_241743815_241743638_241743815_241742434_241742574	A3	ENSG00000180902,17	D2HGDH	chr2	0.00568468	-0.191	0.340986	-0.116	0.361337	0.074
DCLK2_150220702_150220778_150220705_150220778_150198001_150198103	A3	ENSG00000170390,15	DCLK2	chr4	0.0102735	-0.394	1	-0.129	1	0.265
EP400P1_132104377_132105304_132104566_132105304_132103996_132104170	A3	ENSG00000185684,14	EP400P1	chr12	0.040923	0.346	0.00877927	0.479	1	0.133
FAM13C_ 59252798_ 59252998_ 59252798_ 59252995_ 59254347_ 59254443	A3	ENSG00000148541,12	FAM13C	chr10	3.66797e-06	0.835	1	1	1	0.165
FDXR_ 74866783_ 74866879_ 74866783_ 74866876_ 74872035_ 74872107	A3	ENSG00000161513,11	FDXR	chr17	0.0210866	-0.148	0.117693	-0.081	0.587393	0.067
FKBP7_178469651_178469785_178469651_178469782_178473028_178473142	A3	ENSG00000079150,17	FKBP7	chr2	3.05296e-06	0.85	1	0.56	1	-0.291
HDAC8_ 72462003_ 72462098_ 72462003_ 72462095_ 72464558_ 72464731	A3	ENSG00000147099,20	HDAC8	chrX	0.0491631	0.141	0.00177752	0.169	1	0.028
IL17RC_ 9929848_ 9929897_ 9929851_ 9929897_ 9928304_ 9928486	A3	ENSG00000163702,19	IL17RC	chr3	0.0204899	-0.307	1	0.041	0.00554747	0.347
LRRC28_ 99333922_ 99334129_ 99334017_ 99334129_ 99287813_ 99287951	A3	ENSG00000168904,14	LRRC28	chr15	0.0415431	-0.132	0.259459	-0.123	1	0.009
LTBP1_ 33257283_ 33257511_ 33257442_ 33257511_ 33252676_ 33252844	A3	ENSG00000049323,15	LTBP1	chr2	0.0318749	0.508	1	0.232	1	-0.276
MFSD11_ 76741968_ 76742048_ 76741993_ 76742048_ 76740956_ 76741064	A3	ENSG00000092931,11	MFSD11	chr17	0.00584988	-0.146	1	-0.05	0.284783	0.096
MPPE1_ 11886712_ 11886781_ 11886712_ 11886778_ 11886916_ 11887025	A3	ENSG00000154889,16	MPPE1	chr18	3.05296e-06	0.374	1	0.132	3.61304e-05	-0.242
MRPS33_141010418_141010660_141010418_141010617_141014550_141014679	A3	ENSG00000090263,15	MRPS33	chr7	0.045386	0.109	0.58398	0.045	0.541603	-0.064
MTG1_133401528_133402245_133402148_133402245_133396162_133396267	A3	ENSG00000148824,18	MTG1	chr10	0.0421678	-0.203	NA	NA	1	-0.049
NAB1_190649830_190649982_190649845_190649982_190649232_190649360	A3	ENSG00000138386,16	NAB1	chr2	0.0204899	0.203	1	0.098	1	-0.105
NAB1_190685475_190685638_190685478_190685638_190673100_190673152	A3	ENSG00000138386,16	NAB1	chr2	0.0079809	0.272	1	0.2	0.520063	-0.072
NCAPH_ 96341674_ 96341894_ 96341713_ 96341894_ 96335800_ 96335848	A3	ENSG00000121152,9	NCAPH	chr2	0.00584988	0.285	0.285449	0.121	0.516031	-0.165
NECAB3_ 33659884_ 33660003_ 33659884_ 33659998_ 33660258_ 33660395	A3	ENSG00000125967,16	NECAB3	chr20	0.0401134	-0.105	1	-0.077	1	0.028
NPHP1_110163047_110163135_110163047_110163132_110164687_110164730	A3	ENSG00000144061,12	NPHP1	chr2	0.00495744	-0.527	1	0.165	6.94303e-05	0.692
NPRL2_ 50349385_ 50349828_ 50349385_ 50349494_ 50349930_ 50350022	A3	ENSG00000114388,12	NPRL2	chr3	0.0196882	0.411	0.0740185	0.228	1	-0.183
NVL_224313049_224313155_224313049_224313151_224317693_224317793	A3	ENSG00000143748,17	NVL	chr1	0.0016786	0.742	1	0.872	1	0.131
PEX1_ 92501506_ 92502079_ 92501506_ 92501673_ 92503040_ 92503195	A3	ENSG00000127980,15	PEX1	chr7	0.0204899	-0.18	0.106965	-0.074	1	0.106
PHF1_ 4864314_ 4864395_ 4864317_ 4864395_ 4863959_ 4864054	A3	ENSG00000225553,7	PHF1	chrGL000256,2	0.00600627	-0.642	1	-0.197	0.0483998	0.445
PLEKHH3_ 42672085_ 42672392_ 42672085_ 42672212_ 42673175_ 42673296	A3	ENSG00000068137,14	PLEKHH3	chr17	0.0421678	0.21	1	0.007	0.184467	-0.204
POU6F1_ 51198549_ 51198775_ 51198549_ 51198686_ 51199746_ 51199868	A3	ENSG00000184271,17	POU6F1	chr12	0.0218317	0.226	1	0.078	0.0880849	-0.148
PPARA_ 46198341_ 46198591_ 46198344_ 46198591_ 46151887_ 46151970	A3	ENSG00000186951,16	PPARA	chr22	0.0119906	-0.382	1	0.084	1	0.466
PPIL3_200885261_200885367_200885261_200885343_200885697_200885772	A3	ENSG00000240344,8	PPIL3	chr2	0.018513	0.213	1	0.049	0.0425487	-0.164
PPP1R21_ 48454555_ 48454741_ 48454594_ 48454741_ 48451007_ 48451076	A3	ENSG00000162869,15	PPP1R21	chr2	0.0419703	-0.276	1	-0.064	0.0919266	0.212
PPP4C_ 30082745_ 30083567_ 30083393_ 30083567_ 30082483_ 30082534	A3	ENSG00000149923,13	PPP4C	chr16	0.0491631	0.154	1	0.005	0.0547541	-0.149
PRDM5_120816452_120816924_120816452_120816574_120818352_120818527	A3	ENSG00000138738,10	PRDM5	chr4	0.0184148	0.241	0.978754	0.086	0.44155	-0.155
PROSER3_ 35765033_ 35765176_ 35765066_ 35765176_ 35764853_ 35764936	A3	ENSG00000167595,15	PROSER3	chr19	0.00411537	0.377	0.438259	-0.004	0.167807	-0.381
PRPF40B_ 49633013_ 49633547_ 49633426_ 49633547_ 49632854_ 49632880	A3	ENSG00000110844,13	PRPF40B	chr12	0.00518726	0.375	1	0.132	0.513287	-0.243
PRUNE1_151018466_151018669_151018556_151018669_151017811_151017904	A3	ENSG00000143363,16	PRUNE1	chr1	0.00518726	0.487	1	0.176	1	-0.311
PTPN4_119877442_119877542_119877463_119877542_119877322_119877365	A3	ENSG00000088179,8	PTPN4	chr2	0.0288425	0.122	0.00177752	0.164	1	0.042
RBM3_ 48575814_ 48576083_ 48575921_ 48576083_ 48575560_ 48575667	A3	ENSG00000102317,17	RBM3	chrX	0.0420938	-0.305	0.377646	-0.328	0.66657	-0.023
RBM5_ 50100531_ 50103166_ 50103082_ 50103166_ 50099981_ 50100051	A3	ENSG00000003756,16	RBM5	chr3	0.0330061	-0.372	1	-0.121	0.278631	0.251
SCNN1D_ 1282241_ 1282315_ 1282275_ 1282315_ 1281410_ 1281610	A3	ENSG00000162572,20	SCNN1D	chr1	0.0345595	-0.245	0.299446	0.088	1	0.333
SEMA5B_122912171_122912342_122912171_122912234_122912842_122913061	A3	ENSG00000082684,15	SEMA5B	chr3	0.00390145	-0.164	0.225753	-0.092	1	0.072
SFPQ_ 35176377_ 35176474_ 35176377_ 35176471_ 35177318_ 35177399	A3	ENSG00000116560,10	SFPQ	chr1	0.0472736	-0.162	0.655928	-0.094	0.814426	0.067
SLC43A1_ 57501151_ 57501374_ 57501151_ 57501329_ 57513957_ 57514124	A3	ENSG00000149150,8	SLC43A1	chr11	0.00411537	0.342	0.0943792	0.253	1	-0.089
ST7L_112616812_112616895_112616812_112616844_112618908_112619189	A3	ENSG00000007341,18	ST7L	chr1	0.0218317	0.18	1	0.022	0.0378978	-0.158
SYNGAP1_ 33447829_ 33447932_ 33447842_ 33447932_ 33446574_ 33446786	A3	ENSG00000197283,16	SYNGAP1	chr6	0.00931861	-0.174	0.00267068	-0.192	1	-0.018
TACO1_ 63606312_ 63607464_ 63607286_ 63607464_ 63604533_ 63604640	A3	ENSG00000136463,7	TACO1	chr17	0.0415431	0.188	NA	NA	0.0390349	-0.188
TBC1D7_ 13326786_ 13326963_ 13326786_ 13326906_ 13328315_ 13328583	A3	ENSG00000145979,17	TBC1D7	chr6	0.00409838	-0.22	0.211617	-0.063	0.22001	0.158
TCTN1_110627929_110628224_110628051_110628224_110626361_110626492	A3	ENSG00000204852,15	TCTN1	chr12	0.0126125	-0.63	0.158747	-0.407	0.541158	0.223
TMEM134_ 67467500_ 67467590_ 67467500_ 67467563_ 67468016_ 67468092	A3	ENSG00000172663,8	TMEM134	chr11	0.0300386	0.193	0.0786044	0.111	1	-0.082
TMEM218_125102131_125102351_125102131_125102317_125102733_125102809	A3	ENSG00000150433,9	TMEM218	chr11	0.00733609	-0.122	0.212715	-0.042	0.886554	0.08
TP73-AS1_ 3742803_ 3742960_ 3742803_ 3742911_ 3743060_ 3743190	A3	ENSG00000227372,12	TP73-AS1	chr1	0.0016786	0.276	1	-0.123	0.10102	-0.399
TTLL3_ 9818554_ 9818920_ 9818821_ 9818920_ 9817644_ 9817759	A3	ENSG00000214021,15	TTLL3	chr3	0.0411133	0.582	0.513977	0.45	1	-0.132
WDR45_ 49076644_ 49076753_ 49076644_ 49076750_ 49077836_ 49077911	A3	ENSG00000196998,17	WDR45	chrX	0.036023	-0.316	1	-0.028	0.095292	0.288
WDR90_ 666454_ 666792_ 666672_ 666792_ 666219_ 666350	A3	ENSG00000161996,18	WDR90	chr16	0.00239205	0.168	1	0.048	0.0845121	-0.121
WDTC1_ 27303620_ 27305193_ 27305000_ 27305193_ 27301225_ 27301461	A3	ENSG00000142784,15	WDTC1	chr1	0.00362821	-0.436	0.0360651	-0.327	1	0.109
WSB1_ 27307743_ 27309272_ 27309099_ 27309272_ 27306781_ 27306882	A3	ENSG00000109046,14	WSB1	chr17	0.000162176	0.281	0.0591449	0.188	0.869452	-0.094
ZC3H13_ 46045390_ 46045516_ 46045390_ 46045513_ 46052697_ 46052759	A3	ENSG00000123200,16	ZC3H13	chr13	0.011264	0.533	0.00593247	0.26	0.773036	-0.274
ZNF19_ 71478878_ 71479100_ 71478878_ 71479005_ 71482081_ 71482143	A3	ENSG00000157429,15	ZNF19	chr16	0.0415431	-0.399	0.316417	-0.199	1	0.201
ZNF286A_ 15700047_ 15700366_ 15700134_ 15700366_ 15699576_ 15699777	A3	ENSG00000187607,15	ZNF286A	chr17	0.0210162	-0.254	1	-0.034	0.0524229	0.219
ZNF575_ 43534336_ 43534501_ 43534405_ 43534501_ 43533794_ 43533902	A3	ENSG00000176472,10	ZNF575	chr19	0.000162176	0.52	1	-0.115	5.25559e-05	-0.635
ZNF692_248857233_248857497_248857233_248857436_248857827_248857859	A3	ENSG00000171163,15	ZNF692	chr1	0.0216337	-0.166	0.517881	-0.076	1	0.091
ZNF7_144829444_144829604_144829477_144829604_144829042_144829090	A3	ENSG00000147789,15	ZNF7	chr8	0.0103741	-0.276	NA	NA	0.00909102	0.276
ZNF711_ 85246929_ 85247651_ 85247546_ 85247651_ 85245902_ 85246022	A3	ENSG00000147180,16	ZNF711	chrX	0.00362821	-0.439	0.0468906	-0.369	1	0.07
ZNF764_ 30553763_ 30556110_ 30553763_ 30556107_ 30557732_ 30557846	A3	ENSG00000169951,9	ZNF764	chr16	0.0324696	0.236	0.35104	0.136	1	-0.1
ZSWIM8_ 73797780_ 73798070_ 73797935_ 73798070_ 73797376_ 73797605	A3	ENSG00000214655,10	ZSWIM8	chr10	0.0218317	-0.177	0.0174587	-0.181	1	-0.004
ABI2_203395655_203395780_203395658_203395780_203391045_203391143	A3	ENSG00000138443,15	ABI2	chr2	1	0.106	0.0388573	-0.164	0.00466974	-0.27
AC022384,1_ 10260136_ 10260670_ 10260185_ 10260670_ 10249371_ 10249614	A3	ENSG00000272410,5	AC022384,1	chr3	1	0.021	0.0108157	0.203	0.0204465	0.182
ADNP_ 50889047_ 50894512_ 50889047_ 50889957_ 50902016_ 50902109	A3	ENSG00000101126,16	ADNP	chr20	1	-0.042	9.29697e-05	-0.474	0.00142076	-0.432
ADSSL1_104739749_104739816_104739766_104739816_104739327_104739378	A3	ENSG00000185100,10	ADSSL1	chr14	1	-0.245	0.0135285	-0.461	1	-0.216
AHDC1_ 27553073_ 27553290_ 27553073_ 27553185_ 27558304_ 27558530	A3	ENSG00000126705,14	AHDC1	chr1	1	0.007	0.0268486	0.145	0.0146791	0.138
AKAP13_ 85710578_ 85710645_ 85710581_ 85710645_ 85708018_ 85708086	A3	ENSG00000170776,21	AKAP13	chr15	1	-0.032	0.155454	0.135	0.00951933	0.167
AL392172,1_222836922_222837384_222837218_222837384_222835118_222835215	A3	ENSG00000228106,5	AL392172,1	chr1	1	0.333	0.0200347	-0.434	1	-0.767
AMOTL2_134358539_134358719_134358539_134358716_134359282_134359503	A3	ENSG00000114019,14	AMOTL2	chr3	0.901647	-0.106	0.0429811	-0.221	0.414239	-0.115
AP5S1_ 3823870_ 3825302_ 3823874_ 3825302_ 3822101_ 3822293	A3	ENSG00000125843,10	AP5S1	chr20	0.322521	-0.096	1	0.02	0.0143808	0.116
APRT_ 88809468_ 88809840_ 88809468_ 88809706_ 88810069_ 88810148	A3	ENSG00000198931,10	APRT	chr16	1	0.019	0.126416	-0.11	0.018364	-0.129
ATG4D_ 10546838_ 10547253_ 10547188_ 10547253_ 10544956_ 10545130	A3	ENSG00000130734,9	ATG4D	chr19	0.374827	-0.136	0.415289	0.172	5.25559e-05	0.308
ATG9A_219228433_219228485_219228433_219228482_219229534_219229639	A3	ENSG00000198925,11	ATG9A	chr2	1	-0.035	0.0248135	-0.216	0.0211086	-0.18
ATP10D_ 47536685_ 47536938_ 47536730_ 47536938_ 47536436_ 47536564	A3	ENSG00000145246,13	ATP10D	chr4	0.883381	0.141	1	-0.071	0.0242194	-0.213
ATP6V0D1_ 67438970_ 67439147_ 67438970_ 67439095_ 67439273_ 67439351	A3	ENSG00000159720,11	ATP6V0D1	chr16	0.231897	0.062	0.001097	0.141	0.519397	0.079
CACNB3_ 48826244_ 48826518_ 48826419_ 48826518_ 48825659_ 48825769	A3	ENSG00000167535,7	CACNB3	chr12	0.872257	-0.117	0.0481199	-0.204	1	-0.087
CBWD5_ 65732946_ 65733122_ 65732992_ 65733122_ 65731801_ 65731867	A3	ENSG00000147996,16	CBWD5	chr9	1	-0.003	0.108675	0.214	0.018364	0.217
CCDC88A_ 55287847_ 55291164_ 55287847_ 55288355_ 55291675_ 55291775	A3	ENSG00000115355,16	CCDC88A	chr2	0.141552	0.149	0.0196284	0.328	1	0.179
CENPK_ 65554796_ 65554946_ 65554796_ 65554898_ 65561462_ 65561564	A3	ENSG00000123219,12	CENPK	chr5	0.141552	0.073	0.0190282	0.118	1	0.045
CEP76_ 12698978_ 12699203_ 12698978_ 12699165_ 12699829_ 12699900	A3	ENSG00000101624,10	CEP76	chr18	0.109562	-0.129	1	0.089	0.0412875	0.218
CIRBP_ 1273493_ 1273715_ 1273600_ 1273715_ 1271980_ 1272051	A3	ENSG00000099622,13	CIRBP	chr19	1	-0.144	0.106501	0.28	0.0146093	0.424
CIZ1_128180720_128180814_128180720_128180799_128185546_128185776	A3	ENSG00000148337,20	CIZ1	chr9	0.872257	-0.042	0.0043274	-0.109	0.0858824	-0.067
CLK1_200856890_200857884_200856890_200856985_200857972_200858089	A3	ENSG00000013441,15	CLK1	chr2	0.0743011	0.128	1	-0.033	0.0320625	-0.161
CNIH4_224375794_224379452_224379068_224379452_224365878_224365991	A3	ENSG00000143771,11	CNIH4	chr1	1	-0.263	0.000225887	-0.565	0.156696	-0.302
COL18A1_ 45505834_ 45505966_ 45505837_ 45505966_ 45505357_ 45505431	A3	ENSG00000182871,14	COL18A1	chr21	1	0.036	0.0344126	-0.246	0.00760456	-0.282
COMMD6_ 75530310_ 75530408_ 75530310_ 75530405_ 75537663_ 75537675	A3	ENSG00000188243,12	COMMD6	chr13	1	0.163	0.000125046	0.663	1	0.5
CORO6_ 29614755_ 29615857_ 29614755_ 29615854_ 29615944_ 29616175	A3	ENSG00000167549,18	CORO6	chr17	1	-0.003	0.00521155	0.245	0.036471	0.248
DLG4_ 7204007_ 7204067_ 7204007_ 7204058_ 7204198_ 7204252	A3	ENSG00000132535,19	DLG4	chr17	0.943962	-0.049	0.0178985	0.117	0.000366165	0.166
DLGAP4_ 36499587_ 36499676_ 36499602_ 36499676_ 36497446_ 36497602	A3	ENSG00000080845,17	DLGAP4	chr20	1	-0.055	1	0.089	0.0310429	0.144
DPF1_ 38222547_ 38222708_ 38222547_ 38222703_ 38229558_ 38229677	A3	ENSG00000011332,19	DPF1	chr19	1	-0.047	0.133356	0.079	0.00555532	0.126
DSN1_ 36770872_ 36771024_ 36770872_ 36770977_ 36771424_ 36771473	A3	ENSG00000149636,15	DSN1	chr20	1	0.049	0.0043274	0.302	0.0148499	0.252
ECI2_ 4133548_ 4133711_ 4133548_ 4133701_ 4135510_ 4135597	A3	ENSG00000198721,12	ECI2	chr6	1	0.062	0.184844	-0.124	0.0300688	-0.186
EDA2R_ 66599473_ 66599866_ 66599473_ 66599860_ 66602632_ 66602797	A3	ENSG00000131080,14	EDA2R	chrX	0.0542204	-0.09	0.00883364	-0.296	0.645445	-0.206
EME1_ 50378594_ 50378681_ 50378599_ 50378681_ 50376065_ 50376193	A3	ENSG00000154920,14	EME1	chr17	0.242398	-0.075	0.0228392	-0.105	1	-0.03
EXOSC9_121813754_121814047_121813865_121814047_121811582_121811671	A3	ENSG00000123737,12	EXOSC9	chr4	1	0.349	1	-0.183	0.00281093	-0.532
FAM193B_177531952_177532200_177531952_177532131_177532442_177532641	A3	ENSG00000146067,15	FAM193B	chr5	1	0.117	0.0380917	-0.19	1	-0.307
FANK1_126009053_126009592_126009372_126009592_126008406_126008550	A3	ENSG00000203780,10	FANK1	chr10	1	0.39	0.0402094	-0.477	1	-0.867
FMR1_147944868_147945051_147944904_147945051_147943130_147943326	A3	ENSG00000102081,14	FMR1	chrX	0.209338	0.166	0.71178	-0.12	0.00668487	-0.286
FST_ 53484996_ 53485227_ 53484999_ 53485227_ 53484068_ 53484293	A3	ENSG00000134363,11	FST	chr5	1	0.037	0.000225887	0.238	0.00508899	0.202
HM13_ 31548964_ 31549114_ 31549028_ 31549114_ 31548676_ 31548793	A3	ENSG00000101294,17	HM13	chr20	1	-0.005	0.00030448	0.308	NA	NA
HPS4_ 26470718_ 26470922_ 26470718_ 26470813_ 26471212_ 26471388	A3	ENSG00000100099,20	HPS4	chr22	1	-0.113	1	0.121	0.0257274	0.234
ILF3_ 10684415_ 10685765_ 10684858_ 10685765_ 10683916_ 10683970	A3	ENSG00000129351,17	ILF3	chr19	0.0189358	0.087	1	-0.024	0.00142076	-0.111
IRAK1_154013042_154013433_154013042_154013343_154016031_154016097	A3	ENSG00000184216,13	IRAK1	chrX	1	0.167	1	-0.5	0.00310317	-0.667
KALRN_124434306_124434525_124434333_124434525_124430655_124430775	A3	ENSG00000160145,15	KALRN	chr3	0.405507	-0.31	0.00104802	0.396	0.000186575	0.707
LRRC45_ 82029018_ 82029185_ 82029092_ 82029185_ 82028612_ 82028683	A3	ENSG00000169683,7	LRRC45	chr17	0.144152	0.105	1	-0.026	0.0437056	-0.131
LUC7L3_ 50749218_ 50749344_ 50749223_ 50749344_ 50746541_ 50746702	A3	ENSG00000108848,15	LUC7L3	chr17	0.250522	-0.057	0.517535	0.09	0.00369556	0.147
MDM4_204537429_204537497_204537458_204537497_204532190_204532246	A3	ENSG00000198625,12	MDM4	chr1	0.0532502	0.157	1	-0.017	0.00909102	-0.174
MED24_ 40033344_ 40033771_ 40033344_ 40033456_ 40034915_ 40034972	A3	ENSG00000008838,19	MED24	chr17	0.216754	0.145	0.0043274	0.214	1	0.068
MEG8_100959801_100960179_100960060_100960179_100958261_100958343	A3	ENSG00000225746,11	MEG8	chr14	1	0.037	0.0481199	-0.151	0.49732	-0.187
MFSD9_102723699_102723909_102723699_102723878_102726844_102726974	A3	ENSG00000135953,10	MFSD9	chr2	0.0526949	0.322	1	-0.035	0.00310317	-0.358
MIAT_ 26665456_ 26666937_ 26665530_ 26666937_ 26663315_ 26663398	A3	ENSG00000225783,7	MIAT	chr22	0.369841	-0.155	0.0617129	0.114	0.00142076	0.269
MLLT10_ 21740029_ 21740236_ 21740153_ 21740236_ 21735138_ 21735235	A3	ENSG00000078403,16	MLLT10	chr10	0.0592572	-0.141	0.0200347	-0.161	1	-0.02
MPND_ 4357252_ 4357421_ 4357339_ 4357421_ 4355096_ 4355173	A3	ENSG00000008382,15	MPND	chr19	1	-0.05	0.625479	0.073	0.018364	0.123
MUTYH_ 45333412_ 45333603_ 45333412_ 45333594_ 45334390_ 45334511	A3	ENSG00000132781,17	MUTYH	chr1	1	-0.161	0.00877927	-0.667	0.0143629	-0.506
MYADM_ 53869689_ 53869838_ 53869753_ 53869838_ 53867882_ 53867943	A3	ENSG00000179820,15	MYADM	chr19	1	-0.051	0.00177752	0.269	0.174483	0.32
NAB1_190685475_190685638_190685478_190685638_190683737_190683827	A3	ENSG00000138386,16	NAB1	chr2	1	-0.044	0.00102983	-0.157	0.0444277	-0.113
NAGK_ 71075554_ 71076701_ 71076603_ 71076701_ 71072640_ 71073594	A3	ENSG00000124357,12	NAGK	chr2	1	-0.043	0.0411747	-0.104	0.427495	-0.061
NDUFAF6_ 95036301_ 95036494_ 95036370_ 95036494_ 95035453_ 95035576	A3	ENSG00000156170,12	NDUFAF6	chr8	1	-0.006	1	0.37	0.0269721	0.376
NPAS3_ 33367185_ 33367268_ 33367191_ 33367268_ 33215181_ 33215426	A3	ENSG00000151322,18	NPAS3	chr14	1	-0.04	0.0178229	-0.104	0.38283	-0.064
NR1H2_ 50379001_ 50379181_ 50379133_ 50379181_ 50378521_ 50378796	A3	ENSG00000131408,13	NR1H2	chr19	0.432388	0.057	0.0200347	-0.052	3.61304e-05	-0.109
NR1H2_ 50379091_ 50379181_ 50379133_ 50379181_ 50378521_ 50378796	A3	ENSG00000131408,13	NR1H2	chr19	0.794697	0.117	0.00539109	-0.098	6.94303e-05	-0.214
NSUN5_ 73304229_ 73304408_ 73304229_ 73304404_ 73304746_ 73304862	A3	ENSG00000130305,16	NSUN5	chr7	0.995963	-0.17	0.0277451	-0.271	0.948789	-0.101
OSBP2_ 30889176_ 30889234_ 30889179_ 30889234_ 30888222_ 30888340	A3	ENSG00000184792,15	OSBP2	chr22	1	-0.049	0.424845	0.177	0.0101264	0.226
PHF21A_ 45935120_ 45935246_ 45935120_ 45935157_ 45935635_ 45935739	A3	ENSG00000135365,15	PHF21A	chr11	1	-0.027	9.29697e-05	-0.596	3.61304e-05	-0.568
PHF21A_ 45969814_ 45969904_ 45969814_ 45969901_ 45971115_ 45971367	A3	ENSG00000135365,15	PHF21A	chr11	1	0.009	0.00522669	-0.131	0.0108435	-0.14
PILRB_100353372_100354012_100353894_100354012_100353209_100353270	A3	ENSG00000121716,20	PILRB	chr7	1	0.086	0.0392919	0.296	0.25287	0.21
PLD3_ 40366383_ 40366510_ 40366418_ 40366510_ 40365552_ 40365585	A3	ENSG00000105223,19	PLD3	chr19	1	0.052	0.0173974	-0.406	0.00180359	-0.458
PMS2_ 5999107_ 5999275_ 5999107_ 5999226_ 6002452_ 6002636	A3	ENSG00000122512,15	PMS2	chr7	1	-0.011	0.00627708	-0.136	0.00710459	-0.126
POLK_ 75593877_ 75594049_ 75593965_ 75594049_ 75590343_ 75590440	A3	ENSG00000122008,15	POLK	chr5	1	-0.117	0.0426549	-0.13	1	-0.013
PPHLN1_ 42445972_ 42446290_ 42445990_ 42446290_ 42442640_ 42442741	A3	ENSG00000134283,17	PPHLN1	chr12	1	-0.071	0.0588038	0.249	0.00664913	0.32
PPP1R3E_ 23298292_ 23298917_ 23298292_ 23298547_ 23299400_ 23299541	A3	ENSG00000235194,8	PPP1R3E	chr14	1	-0.085	0.00877927	-0.385	0.278631	-0.3
PPP4R1L_ 58232687_ 58232922_ 58232687_ 58232829_ 58235239_ 58235374	A3	ENSG00000124224,16	PPP4R1L	chr20	1	0.234	1	-0.314	6.94303e-05	-0.548
PRR13_ 53443540_ 53443773_ 53443566_ 53443773_ 53442694_ 53442733	A3	ENSG00000205352,10	PRR13	chr12	1	0.178	0.0259443	0.426	0.46622	0.249
PSMD2_184301770_184302071_184301793_184302071_184301536_184301658	A3	ENSG00000175166,16	PSMD2	chr3	1	-0.524	0.0402094	-0.209	1	0.316
PTBP2_ 96804784_ 96804939_ 96804799_ 96804939_ 96785058_ 96785254	A3	ENSG00000117569,18	PTBP2	chr1	1	-0.025	0.0318992	0.157	0.0183903	0.182
PXK_ 58412900_ 58412963_ 58412903_ 58412963_ 58410089_ 58410159	A3	ENSG00000168297,15	PXK	chr3	0.237788	-0.39	0.037536	-0.385	0.895565	0.005
RACK1_181240215_181240345_181240215_181240327_181241491_181241639	A3	ENSG00000204628,11	RACK1	chr5	0.454023	0.254	1	-0.218	0.0162852	-0.472
RCE1_ 66843955_ 66844039_ 66843959_ 66844039_ 66843758_ 66843861	A3	ENSG00000173653,7	RCE1	chr11	0.934454	-0.119	0.479258	0.165	0.0257274	0.284
RETREG2_219180109_219180245_219180197_219180245_219179732_219179763	A3	ENSG00000144567,10	RETREG2	chr2	0.391228	-0.029	0.0272039	0.096	6.94303e-05	0.125
REV1_ 99406324_ 99406490_ 99406324_ 99406431_ 99408028_ 99408131	A3	ENSG00000135945,9	REV1	chr2	1	-0.03	0.156649	0.075	0.0269721	0.105
RNF216_ 5740972_ 5741815_ 5740972_ 5741644_ 5752845_ 5752979	A3	ENSG00000011275,18	RNF216	chr7	0.00409838	0.099	0.00233406	0.103	1	0.005
RUSC1_155326609_155327132_155326897_155327132_155325863_155325910	A3	ENSG00000160753,15	RUSC1	chr1	0.791069	-0.061	1	0.049	0.0366607	0.11
SEMA4C_ 96867777_ 96867926_ 96867777_ 96867923_ 96868415_ 96868588	A3	ENSG00000168758,10	SEMA4C	chr2	0.784214	0.309	0.117693	-0.131	0.00171459	-0.44
SERAC1_158119028_158119170_158119028_158119120_158120424_158120575	A3	ENSG00000122335,15	SERAC1	chr6	0.337815	-0.166	0.0178229	-0.22	1	-0.054
SLC25A37_ 23568258_ 23568378_ 23568321_ 23568378_ 23566107_ 23566336	A3	ENSG00000147454,13	SLC25A37	chr8	0.168632	0.477	0.117693	-0.083	0.00588585	-0.56
SLC38A6_ 61078809_ 61078927_ 61078829_ 61078927_ 61046066_ 61046167	A3	ENSG00000139974,15	SLC38A6	chr14	0.180277	-0.508	0.0215634	-0.589	1	-0.081
SMYD5_ 73219951_ 73220190_ 73220069_ 73220190_ 73218860_ 73218969	A3	ENSG00000135632,11	SMYD5	chr2	1	0.361	0.00233587	0.592	1	0.232
STAG3L5P-PVRIG2P-PILRB_100352162_100352478_100352261_100352478_100351251_100351410	A3	ENSG00000272752,6	STAG3L5P-PVRIG2P-PILRB	chr7	1	0.014	0.0843959	-0.201	0.0280237	-0.214
SUPT20H_ 37022010_ 37023044_ 37022010_ 37022317_ 37024034_ 37024193	A3	ENSG00000102710,19	SUPT20H	chr13	0.116359	-0.293	0.735511	0.024	0.00909102	0.317
TAF1D_ 93733349_ 93733505_ 93733349_ 93733397_ 93734624_ 93734660	A3	ENSG00000166012,16	TAF1D	chr11	0.647811	0.077	0.751462	-0.064	0.0274701	-0.141
TCTN1_110647195_110647336_110647210_110647336_110640382_110640517	A3	ENSG00000204852,15	TCTN1	chr12	0.58505	0.396	0.0445454	0.446	1	0.05
TIAL1_119580470_119580846_119580470_119580538_119581921_119582009	A3	ENSG00000151923,17	TIAL1	chr10	1	0.038	0.0321022	0.243	0.0858824	0.205
TRMT44_ 8449668_ 8449888_ 8449697_ 8449888_ 8446475_ 8446590	A3	ENSG00000155275,18	TRMT44	chr4	1	-0.098	0.0499082	-0.306	0.108434	-0.208
TTLL5_ 75792912_ 75793100_ 75792915_ 75793100_ 75783146_ 75783530	A3	ENSG00000119685,19	TTLL5	chr14	1	0.073	0.0445454	0.224	0.854975	0.151
UBE3A_ 25407066_ 25407262_ 25407066_ 25407137_ 25409087_ 25409207	A3	ENSG00000114062,19	UBE3A	chr15	1	-0.014	0.0465486	0.485	0.00149087	0.499
UBR4_ 19154917_ 19155078_ 19154917_ 19155075_ 19155440_ 19155668	A3	ENSG00000127481,14	UBR4	chr1	0.0126559	-0.073	0.0342511	-0.166	1	-0.093
USP37_218558497_218558717_218558497_218558677_218560819_218560883	A3	ENSG00000135913,10	USP37	chr2	0.829872	-0.035	1	0.099	0.00310317	0.134
XPO1_ 61483936_ 61485962_ 61483936_ 61484105_ 61488164_ 61488271	A3	ENSG00000082898,16	XPO1	chr2	1	0.004	0.00471688	-0.131	0.000634626	-0.135
ZFP30_ 37643264_ 37643363_ 37643264_ 37643360_ 37644609_ 37644736	A3	ENSG00000120784,16	ZFP30	chr19	0.91441	0.186	0.0253296	0.306	1	0.12
ZNF326_ 90007344_ 90007750_ 90007611_ 90007750_ 90005132_ 90005244	A3	ENSG00000162664,16	ZNF326	chr1	0.692751	0.068	0.0215908	0.207	0.444133	0.138
ZNF419_ 57491467_ 57491597_ 57491470_ 57491597_ 57487717_ 57487983	A3	ENSG00000105136,20	ZNF419	chr19	1	-0.42	1	0.328	0.00588585	0.748
ZNF512_ 27598066_ 27598254_ 27598069_ 27598254_ 27583657_ 27583716	A3	ENSG00000243943,9	ZNF512	chr2	0.367222	-0.101	0.654143	0.116	0.0135967	0.217
COPS2_ 49137347_ 49137458_ 49137347_ 49137437_ 49144226_ 49144304	A3	ENSG00000166200,14	COPS2	chr15	NA	NA	NA	NA	6.94303e-05	-0.372
GJA9-MYCBP_ 38866879_ 38867009_ 38866879_ 38866999_ 38873017_ 38873090	A3	ENSG00000274944,4	GJA9-MYCBP	chr1	NA	NA	1	-0.51	0.000931099	-0.51
NR1H3_ 47261546_ 47262018_ 47261918_ 47262018_ 47261240_ 47261449	A3	ENSG00000025434,18	NR1H3	chr11	NA	NA	0.037536	0.391	0.0318418	0.391
PRKAG1_ 49005461_ 49005592_ 49005461_ 49005543_ 49013061_ 49013110	A3	ENSG00000181929,12	PRKAG1	chr12	NA	NA	0.0165507	-0.452	0.0425487	-0.397
RHPN1_143379828_143380175_143380061_143380175_143379314_143379508	A3	ENSG00000158106,13	RHPN1	chr8	NA	NA	0.0392919	0.255	0.0346212	0.255
RTEL1_ 63694318_ 63694488_ 63694375_ 63694488_ 63693142_ 63693283	A3	ENSG00000258366,8	RTEL1	chr20	NA	NA	0.00177752	0.508	1	0.508
ADAMTS14_ 70730101_ 70730258_ 70730101_ 70730249_ 70732253_ 70732359	A5	ENSG00000138316,10	ADAMTS14	chr10	0.00310337	-0.537	1	-0.376	0.120693	0.161
ADPRM_ 10704909_ 10705615_ 10704909_ 10705527_ 10706437_ 10706554	A5	ENSG00000170222,11	ADPRM	chr17	0.0162316	0.395	0.939975	0.182	0.191099	-0.213
AP1G2_ 23565815_ 23566160_ 23566063_ 23566160_ 23565605_ 23565701	A5	ENSG00000213983,11	AP1G2	chr14	0.00463295	-0.374	0.0325483	-0.307	1	0.067
BANP_ 87975047_ 87975207_ 87975047_ 87975203_ 87981035_ 87981127	A5	ENSG00000172530,20	BANP	chr16	0.0208353	0.329	1	0.915	1	0.586
C18orf54_ 54361642_ 54362431_ 54361642_ 54361891_ 54362770_ 54362921	A5	ENSG00000166845,14	C18orf54	chr18	0.0449238	0.184	0.00033084	0.238	0.428931	0.054
CASP8AP2_ 89829899_ 89830106_ 89829899_ 89830067_ 89846561_ 89846644	A5	ENSG00000118412,12	CASP8AP2	chr6	0.00337884	0.449	0.841515	0.166	0.0670066	-0.283
CCDC159_ 11346504_ 11346634_ 11346504_ 11346627_ 11349653_ 11349687	A5	ENSG00000183401,11	CCDC159	chr19	0.0421601	0.311	1	0.086	0.0702228	-0.225
CLTCL1_ 19201328_ 19201493_ 19201390_ 19201493_ 19199733_ 19199841	A5	ENSG00000070371,15	CLTCL1	chr22	0.0187363	0.244	0.0776278	0.123	1	-0.121
CTNND1_ 57761796_ 57762119_ 57761796_ 57762068_ 57789036_ 57789155	A5	ENSG00000198561,13	CTNND1	chr11	0.00322593	0.412	1	0.084	0.0698317	-0.328
CYB5A_ 74255740_ 74260944_ 74260914_ 74260944_ 74253296_ 74253665	A5	ENSG00000166347,18	CYB5A	chr18	0.0148316	0.3	1	-0.045	0.00404729	-0.345
CYB5RL_ 54190737_ 54190896_ 54190747_ 54190896_ 54187651_ 54187739	A5	ENSG00000215883,10	CYB5RL	chr1	4.753e-06	-0.605	1	-0.052	0.000909625	0.553
DAG1_ 49476848_ 49476905_ 49476848_ 49476900_ 49510418_ 49510819	A5	ENSG00000173402,11	DAG1	chr3	0.0203449	0.465	0.155169	0.302	0.956217	-0.163
ELMOD3_ 85371085_ 85371562_ 85371085_ 85371209_ 85377343_ 85377474	A5	ENSG00000115459,17	ELMOD3	chr2	0.0218416	0.48	0.77748	0.232	0.159353	-0.248
EWSR1_ 29288605_ 29291599_ 29288605_ 29288786_ 29292136_ 29292169	A5	ENSG00000182944,17	EWSR1	chr22	0.0221593	-0.111	1	0.126	0.00148355	0.236
FAM66B_ 7348972_ 7349146_ 7349082_ 7349146_ 7325136_ 7325198	A5	ENSG00000215374,5	FAM66B	chr8	0.0404363	-0.301	0.432368	-0.111	0.649928	0.19
FAM66C_ 8188471_ 8188645_ 8188471_ 8188535_ 8194202_ 8194481	A5	ENSG00000226711,6	FAM66C	chr12	0.00337884	0.445	0.0513503	0.366	1	-0.079
GSS_ 34942487_ 34943006_ 34942930_ 34943006_ 34936942_ 34937023	A5	ENSG00000100983,10	GSS	chr20	0.0194931	0.373	1	0.035	0.015539	-0.338
GSTCD_105717592_105718039_105717592_105717778_105719059_105719527	A5	ENSG00000138780,14	GSTCD	chr4	0.0196796	-0.218	1	-0.058	0.0262276	0.16
KRBOX4_ 46463197_ 46463308_ 46463197_ 46463293_ 46472752_ 46473594	A5	ENSG00000147121,15	KRBOX4	chrX	0.0014149	0.408	1	-0.157	0.00199805	-0.564
MID1_ 10566887_ 10567603_ 10567001_ 10567603_ 10523091_ 10523187	A5	ENSG00000101871,14	MID1	chrX	0.00663071	0.521	1	-0.06	1	-0.581
MUTYH_ 45338185_ 45338656_ 45338506_ 45338656_ 45334390_ 45334511	A5	ENSG00000132781,17	MUTYH	chr1	0.012643	-0.397	1	-0.157	1	0.24
NFATC1_ 79486247_ 79486937_ 79486247_ 79486630_ 79527527_ 79529323	A5	ENSG00000131196,17	NFATC1	chr18	0.000862446	-0.38	1	-0.093	1	0.287
NFIB_ 14116180_ 14116346_ 14116207_ 14116346_ 14112998_ 14113081	A5	ENSG00000147862,16	NFIB	chr9	0.0449238	0.321	1	0.521	1	0.199
NHEJ1_219078073_219078206_219078088_219078206_219077245_219077364	A5	ENSG00000187736,12	NHEJ1	chr2	2.70778e-06	-0.178	1	-0.049	0.0220252	0.129
NOL3_ 67174161_ 67174464_ 67174161_ 67174340_ 67174620_ 67174944	A5	ENSG00000140939,14	NOL3	chr16	0.0449238	0.122	1	0.005	0.0483337	-0.118
NPHP1_110164519_110164730_110164687_110164730_110163047_110163132	A5	ENSG00000144061,12	NPHP1	chr2	0.0154387	-0.448	1	-0.018	0.00997897	0.431
NUDT4_ 93378577_ 93378790_ 93378577_ 93378693_ 93394608_ 93394719	A5	ENSG00000173598,13	NUDT4	chr12	0.0196796	-0.563	0.0186281	-0.501	1	0.062
PARK7_ 7961662_ 7961793_ 7961662_ 7961735_ 7962762_ 7962875	A5	ENSG00000116288,12	PARK7	chr1	0.0117174	0.121	0.171552	0.079	0.903804	-0.042
PCBP1-AS1_ 70083506_ 70083687_ 70083537_ 70083687_ 70059642_ 70059680	A5	ENSG00000179818,13	PCBP1-AS1	chr2	0.0169098	-0.538	1	-0.055	0.0165056	0.482
PHC3_170181686_170181733_170181701_170181733_170178772_170178938	A5	ENSG00000173889,15	PHC3	chr3	0.0301947	0.492	1	0.047	1	-0.445
PIGA_ 15331215_ 15331992_ 15331589_ 15331992_ 15325913_ 15326046	A5	ENSG00000165195,15	PIGA	chrX	0.0154387	-0.47	0.00572438	-0.481	1	-0.011
PNISR_ 99403828_ 99404702_ 99404602_ 99404702_ 99402539_ 99402710	A5	ENSG00000132424,15	PNISR	chr6	0.0203449	-0.114	0.0236369	-0.111	1	0.003
POLM_ 44074130_ 44074530_ 44074397_ 44074530_ 44073782_ 44074025	A5	ENSG00000122678,16	POLM	chr7	0.00601718	-0.245	0.621193	-0.091	0.667183	0.154
RPL6_112409040_112409574_112409492_112409574_112408419_112408656	A5	ENSG00000089009,15	RPL6	chr12	0.000222892	0.667	1	0.704	1	0.037
SAMD9L_ 93146882_ 93147146_ 93147087_ 93147146_ 93145384_ 93146040	A5	ENSG00000177409,11	SAMD9L	chr7	0.0107004	0.295	0.0115072	0.331	1	0.036
SEMA3B_ 50275011_ 50275459_ 50275011_ 50275053_ 50275559_ 50275615	A5	ENSG00000012171,19	SEMA3B	chr3	0.0340383	0.2	1	0.003	0.0611393	-0.197
SEMA5B_122911359_122911535_122911490_122911535_122910839_122911045	A5	ENSG00000082684,15	SEMA5B	chr3	0.00163959	0.143	1	0.063	0.0116692	-0.079
SHMT2_ 57230359_ 57230660_ 57230359_ 57230462_ 57230802_ 57231000	A5	ENSG00000182199,10	SHMT2	chr12	0.0449238	0.311	1	0.014	0.00454993	-0.297
SLC25A19_ 75288387_ 75288591_ 75288501_ 75288591_ 75286632_ 75286802	A5	ENSG00000125454,11	SLC25A19	chr17	0.0301947	0.244	1	-0.034	0.0144149	-0.278
SLC25A19_ 75288497_ 75288591_ 75288501_ 75288591_ 75286632_ 75286802	A5	ENSG00000125454,11	SLC25A19	chr17	0.000172865	0.886	1	0.886	NA	NA
SLC33A1_155833467_155834041_155833856_155834041_155829687_155829903	A5	ENSG00000169359,14	SLC33A1	chr3	0.0154387	-0.319	0.0205248	-0.263	1	0.056
SLC37A4_119027627_119028426_119028193_119028426_119026936_119027095	A5	ENSG00000137700,18	SLC37A4	chr11	2.70778e-06	0.64	NA	NA	1	-0.64
SNHG14_ 25087466_ 25089866_ 25087466_ 25087599_ 25091589_ 25091719	A5	ENSG00000224078,13	SNHG14	chr15	0.00163959	-0.454	0.072561	-0.312	1	0.142
STARD4_111512384_111512535_111512390_111512535_111506329_111506379	A5	ENSG00000164211,12	STARD4	chr5	0.00505006	0.438	NA	NA	0.00389981	-0.438
STUB1_ 681792_ 681903_ 681792_ 681880_ 682058_ 682076	A5	ENSG00000103266,10	STUB1	chr16	0.00444845	0.335	NA	NA	1	-0.069
TMEM218_125102636_125102809_125102733_125102809_125102131_125102351	A5	ENSG00000150433,9	TMEM218	chr11	0.00635437	0.225	0.0477469	0.105	0.872366	-0.12
TRA2A_ 23522120_ 23522432_ 23522353_ 23522432_ 23521706_ 23521840	A5	ENSG00000164548,10	TRA2A	chr7	0.0229063	0.245	1	0.009	0.0376499	-0.236
TRA2A_ 23522131_ 23522432_ 23522353_ 23522432_ 23521706_ 23521840	A5	ENSG00000164548,10	TRA2A	chr7	0.0154387	0.353	1	0.07	0.120693	-0.283
TRERF1_ 42362946_ 42363079_ 42362996_ 42363079_ 42300637_ 42300749	A5	ENSG00000124496,12	TRERF1	chr6	0.0203449	0.46	0.926057	0.162	0.121283	-0.298
TRRAP_ 99030594_ 99030764_ 99030594_ 99030757_ 99030884_ 99031000	A5	ENSG00000196367,13	TRRAP	chr7	0.0117752	0.371	0.298268	0.328	1	-0.043
ULK3_ 74842534_ 74842676_ 74842538_ 74842676_ 74842279_ 74842420	A5	ENSG00000140474,13	ULK3	chr15	0.035082	0.513	0.224927	0.234	0.367682	-0.279
WWC1_168441681_168441849_168441681_168441834_168444493_168444585	A5	ENSG00000113645,14	WWC1	chr5	0.000222892	-0.366	0.298268	-0.06	0.193489	0.306
ZNF207_ 32369598_ 32369782_ 32369598_ 32369745_ 32373398_ 32373457	A5	ENSG00000010244,18	ZNF207	chr17	0.00601718	0.667	1	0.241	0.0198676	-0.425
ZNF688_ 30571433_ 30572734_ 30572121_ 30572734_ 30571009_ 30571123	A5	ENSG00000229809,8	ZNF688	chr16	0.0412103	-0.33	0.0159015	-0.408	1	-0.079
ABCD4_ 74288659_ 74288765_ 74288715_ 74288765_ 74287809_ 74287886	A5	ENSG00000119688,20	ABCD4	chr14	0.110065	-0.427	0.047887	-0.457	1	-0.03
ADAMTS10_ 8595761_ 8595903_ 8595772_ 8595903_ 8592762_ 8592870	A5	ENSG00000142303,13	ADAMTS10	chr19	1	0.024	0.0114978	-0.383	0.275212	-0.407
ALG13_111682131_111682300_111682131_111682235_111684964_111685103	A5	ENSG00000101901,11	ALG13	chrX	1	-0.15	0.000690451	-0.582	0.00364002	-0.432
ANK1_ 41661800_ 41661941_ 41661875_ 41661941_ 41655300_ 41655753	A5	ENSG00000029534,20	ANK1	chr8	1	-0.04	0.398706	0.13	0.0412185	0.171
ARHGEF40_ 21075331_ 21075765_ 21075331_ 21075499_ 21076359_ 21076456	A5	ENSG00000165801,9	ARHGEF40	chr14	1	0.04	0.0908685	-0.071	0.00997897	-0.111
ASAH1_ 18064456_ 18067298_ 18067219_ 18067298_ 18063184_ 18063230	A5	ENSG00000104763,18	ASAH1	chr8	0.685825	0.159	0.00263793	0.215	1	0.056
ATP13A2_ 17004691_ 17004821_ 17004706_ 17004821_ 17004331_ 17004408	A5	ENSG00000159363,17	ATP13A2	chr1	1	-0.173	0.449146	0.147	0.0165056	0.32
BHLHB9_102720956_102721091_102720956_102721027_102747816_102747911	A5	ENSG00000198908,11	BHLHB9	chrX	0.937319	0.164	0.0274587	-0.199	0.0119541	-0.363
BICD1_ 32337498_ 32337816_ 32337498_ 32337706_ 32338785_ 32338979	A5	ENSG00000151746,13	BICD1	chr12	1	-0.01	0.000421146	0.493	0.100762	0.503
BSCL2_ 62706202_ 62706344_ 62706258_ 62706344_ 62705300_ 62705617	A5	ENSG00000168000,14	BSCL2	chr11	0.690503	-0.068	0.994129	0.06	0.0165226	0.128
CCDC136_128806236_128806858_128806236_128806395_128807359_128807545	A5	ENSG00000128596,16	CCDC136	chr7	0.166833	0.252	0.0205248	0.364	1	0.112
CCDC78_ 725412_ 725580_ 725445_ 725580_ 725236_ 725293	A5	ENSG00000162004,16	CCDC78	chr16	1	-0.211	0.155423	0.159	0.00389981	0.37
CCNL1_157151728_157151930_157151916_157151930_157150281_157150381	A5	ENSG00000163660,11	CCNL1	chr3	0.0979642	-0.288	0.0325483	-0.359	1	-0.072
CDK20_ 87970567_ 87970897_ 87970775_ 87970897_ 87969795_ 87969919	A5	ENSG00000156345,17	CDK20	chr9	1	-0.039	0.0227386	-0.543	0.00389981	-0.504
CEP152_ 48741600_ 48741704_ 48741630_ 48741704_ 48738150_ 48739288	A5	ENSG00000103995,13	CEP152	chr15	0.351664	0.089	1	-0.049	0.0412185	-0.138
CHCHD7_ 56212761_ 56212909_ 56212761_ 56212889_ 56214597_ 56214667	A5	ENSG00000170791,17	CHCHD7	chr8	1	0.026	0.0164357	0.126	0.694365	0.1
CHD9_ 53307680_ 53307953_ 53307680_ 53307905_ 53308685_ 53308854	A5	ENSG00000177200,17	CHD9	chr16	0.313107	-0.158	8.84738e-05	-0.309	0.00342234	-0.151
CIC_ 42294172_ 42294304_ 42294172_ 42294298_ 42294603_ 42294735	A5	ENSG00000079432,7	CIC	chr19	0.501556	0.106	0.0283438	0.165	1	0.059
CNBP_129171633_129171771_129171654_129171771_129171445_129171508	A5	ENSG00000169714,16	CNBP	chr3	0.868165	0.054	0.0433292	0.112	1	0.058
CNN2_ 1032558_ 1032669_ 1032558_ 1032663_ 1036129_ 1036246	A5	ENSG00000064666,14	CNN2	chr19	0.510712	-0.149	0.0405545	-0.232	1	-0.083
CPS1_210519550_210519784_210519550_210519670_210556718_210556859	A5	ENSG00000021826,15	CPS1	chr2	1	-0.031	3.75366e-13	-0.832	1	-0.8
CPSF7_ 61420469_ 61421608_ 61421389_ 61421608_ 61419921_ 61420094	A5	ENSG00000149532,15	CPSF7	chr11	0.568722	0.062	1	-0.071	0.037142	-0.133
DET1_ 88530622_ 88531473_ 88531296_ 88531473_ 88527598_ 88527786	A5	ENSG00000140543,14	DET1	chr15	1	0.087	0.0442636	0.305	0.0477238	0.218
DGLUCY_ 91173288_ 91173439_ 91173288_ 91173403_ 91175933_ 91176056	A5	ENSG00000133943,20	DGLUCY	chr14	0.463326	-0.087	0.421037	0.279	0.000805357	0.365
FAM114A2_154038292_154038434_154038387_154038434_154034743_154034967	A5	ENSG00000055147,18	FAM114A2	chr5	1	0.031	0.0140387	0.261	0.0566905	0.229
FANCA_ 89798950_ 89799232_ 89799165_ 89799232_ 89792470_ 89792547	A5	ENSG00000187741,14	FANCA	chr16	1	0.097	0.07316	0.329	0.032711	0.232
FIGNL1_ 50449117_ 50449723_ 50449544_ 50449723_ 50448180_ 50448289	A5	ENSG00000132436,11	FIGNL1	chr7	0.930421	0.205	0.294978	-0.341	0.00661211	-0.546
GABPB1_ 50301220_ 50301368_ 50301256_ 50301368_ 50300788_ 50300902	A5	ENSG00000104064,17	GABPB1	chr15	1	0.03	0.00509781	0.231	0.00036026	0.202
GARNL3_127243078_127243253_127243078_127243249_127264951_127265021	A5	ENSG00000136895,18	GARNL3	chr9	1	-0.208	0.000186599	0.453	4.23544e-05	0.661
GCFC2_ 75702198_ 75702423_ 75702312_ 75702423_ 75701189_ 75701287	A5	ENSG00000005436,13	GCFC2	chr2	1	0.031	0.0274587	0.217	0.26795	0.186
GDAP1_ 74351273_ 74351466_ 74351273_ 74351321_ 74360136_ 74360310	A5	ENSG00000104381,12	GDAP1	chr8	1	-0.059	0.906453	-0.183	0.0164146	-0.125
GIT2_109951166_109951316_109951211_109951316_109947255_109947504	A5	ENSG00000139436,20	GIT2	chr12	0.118299	0.141	1	-0.039	0.00157461	-0.18
HSCB_ 28744614_ 28744709_ 28744614_ 28744704_ 28751240_ 28751288	A5	ENSG00000100209,9	HSCB	chr22	1	0.195	1	-0.196	0.00042559	-0.391
IFI6_ 27669220_ 27669346_ 27669244_ 27669346_ 27668457_ 27668535	A5	ENSG00000126709,14	IFI6	chr1	0.173691	-0.124	1	0.013	0.015539	0.137
INTS2_ 61927653_ 61927982_ 61927921_ 61927982_ 61926351_ 61926662	A5	ENSG00000108506,12	INTS2	chr17	0.0831217	0.3	0.00919461	0.45	1	0.15
IRAK4_ 43772911_ 43773072_ 43772911_ 43772986_ 43773964_ 43774029	A5	ENSG00000198001,13	IRAK4	chr12	0.288658	0.151	1	-0.062	0.0116692	-0.213
KCTD18_200504747_200504959_200504769_200504959_200498890_200499084	A5	ENSG00000155729,12	KCTD18	chr2	1	0.045	0.0274587	0.108	0.0417061	0.062
KMT2D_ 49044190_ 49044304_ 49044199_ 49044304_ 49043867_ 49043998	A5	ENSG00000167548,15	KMT2D	chr12	0.59083	0.229	0.00688786	0.417	0.0998614	0.188
LINC00680_ 57948872_ 57949068_ 57948917_ 57949068_ 57946077_ 57947177	A5	ENSG00000215190,9	LINC00680	chr6	1	-0.022	0.906453	0.175	0.029296	0.196
LTK_ 41507513_ 41507657_ 41507561_ 41507657_ 41507094_ 41507290	A5	ENSG00000062524,15	LTK	chr15	1	-0.246	0.0308965	0.475	1	0.72
MDH1B_206756897_206757040_206756911_206757040_206755008_206755505	A5	ENSG00000138400,12	MDH1B	chr2	1	0.195	1	-0.023	0.00296742	-0.218
MTERF4_241095129_241096438_241096392_241096438_241094276_241094432	A5	ENSG00000122085,16	MTERF4	chr2	0.0614198	-0.338	0.000341094	-0.473	1	-0.135
MTRF1L_152995135_152995319_152995243_152995319_152994512_152994676	A5	ENSG00000112031,15	MTRF1L	chr6	0.963286	0.081	0.115334	-0.115	0.00454993	-0.196
MTRR_ 7869103_ 7869215_ 7869103_ 7869189_ 7870769_ 7870923	A5	ENSG00000124275,14	MTRR	chr5	0.332259	-0.161	0.0220221	-0.22	1	-0.059
MTX1_155210547_155212219_155210547_155210627_155212384_155212567	A5	ENSG00000173171,14	MTX1	chr1	1	0.055	0.0271817	-0.222	0.00342234	-0.277
NEK11_131026878_131028002_131026878_131027006_131029612_131029878	A5	ENSG00000114670,13	NEK11	chr3	1	0.555	1	-0.379	8.56208e-10	-0.934
NEMP1_ 57070673_ 57070893_ 57070819_ 57070893_ 57069233_ 57069306	A5	ENSG00000166881,9	NEMP1	chr12	0.431418	0.071	0.841515	-0.057	0.0102753	-0.129
NFKBIL1_ 2899553_ 2899775_ 2899553_ 2899730_ 2899946_ 2900754	A5	ENSG00000235125,8	NFKBIL1	chrGL000254,2	0.110065	0.414	0.0253627	-0.304	0.000138707	-0.717
NSUN4_ 46344800_ 46345144_ 46344800_ 46344962_ 46346920_ 46347075	A5	ENSG00000117481,10	NSUN4	chr1	0.832159	-0.133	0.0274587	-0.209	1	-0.076
NXPE3_101779733_101779934_101779733_101779900_101782109_101782290	A5	ENSG00000144815,15	NXPE3	chr3	0.138979	0.499	0.0220221	0.515	0.971695	0.016
OCIAD1_ 48831226_ 48831433_ 48831226_ 48831398_ 48832619_ 48832682	A5	ENSG00000109180,14	OCIAD1	chr4	1	0.02	1	-0.191	0.00450202	-0.211
OGFOD2_122977980_122978199_122977980_122978091_122978359_122978569	A5	ENSG00000111325,16	OGFOD2	chr12	0.267033	0.465	0.329733	-0.112	0.000735227	-0.577
PAX6_ 31801229_ 31801776_ 31801761_ 31801776_ 31800690_ 31800856	A5	ENSG00000007372,22	PAX6	chr11	0.0823264	-0.181	0.0126617	-0.311	1	-0.131
PLEC_143935010_143935117_143935022_143935117_143934809_143934929	A5	ENSG00000178209,15	PLEC	chr8	0.179612	0.115	0.0236369	0.204	0.871909	0.09
PNKP_ 49861607_ 49861881_ 49861771_ 49861881_ 49861448_ 49861510	A5	ENSG00000039650,11	PNKP	chr19	0.451525	0.105	0.906453	-0.05	0.00578264	-0.154
POLL_101584601_101584919_101584877_101584919_101583507_101583681	A5	ENSG00000166169,16	POLL	chr10	1	0.142	0.0422584	0.238	0.518191	0.096
POLR2G_ 62761794_ 62762866_ 62761794_ 62761904_ 62765181_ 62765232	A5	ENSG00000168002,11	POLR2G	chr11	1	0.232	0.544574	-0.162	0.0164146	-0.394
PRKCSH_ 11447438_ 11447618_ 11447438_ 11447597_ 11447692_ 11447789	A5	ENSG00000130175,9	PRKCSH	chr19	0.332259	0.093	0.00501231	0.16	0.694365	0.067
PTOV1_ 49850734_ 49851096_ 49850734_ 49850955_ 49854405_ 49854543	A5	ENSG00000104960,15	PTOV1	chr19	0.0831217	0.199	0.00501231	0.529	1	0.33
PUS7L_ 43754335_ 43755261_ 43755216_ 43755261_ 43748449_ 43748609	A5	ENSG00000129317,14	PUS7L	chr12	1	0.098	0.235831	-0.32	0.00149814	-0.418
RACK1_181242169_181242345_181242173_181242345_181241491_181241563	A5	ENSG00000204628,11	RACK1	chr5	0.829909	-0.22	0.0335754	-0.297	1	-0.077
RNASEK-C17orf49_ 7014144_ 7014878_ 7014144_ 7014277_ 7015061_ 7015156	A5	ENSG00000161939,19	RNASEK-C17orf49	chr17	1	-0.1	0.00752071	-0.168	1	-0.067
RNF146_127266882_127267095_127266882_127266925_127280230_127280340	A5	ENSG00000118518,15	RNF146	chr6	0.973507	-0.137	0.362917	0.232	0.0458272	0.369
RNF214_117238600_117239111_117238600_117238646_117239800_117239860	A5	ENSG00000167257,10	RNF214	chr11	1	-0.014	0.00851904	-0.171	0.0188501	-0.157
ROBO3_124877518_124878131_124877518_124877752_124878297_124878436	A5	ENSG00000154134,14	ROBO3	chr11	0.0634432	-0.275	1	-0.027	0.037142	0.247
RPL41_ 56116774_ 56116930_ 56116774_ 56116829_ 56117188_ 56117211	A5	ENSG00000229117,8	RPL41	chr12	0.319054	-0.091	0.14338	0.214	0.00404729	0.305
RPS6KB2_ 67432951_ 67433194_ 67432951_ 67433042_ 67433339_ 67433447	A5	ENSG00000175634,14	RPS6KB2	chr11	1	0.283	0.0597525	-0.209	0.0188501	-0.492
SERF2_ 43792367_ 43792611_ 43792367_ 43792578_ 43792974_ 43793083	A5	ENSG00000140264,19	SERF2	chr15	0.131339	-0.116	1	0.091	0.0484685	0.207
SGCB_ 52031851_ 52031961_ 52031864_ 52031961_ 52029677_ 52029863	A5	ENSG00000163069,12	SGCB	chr4	1	-0.119	0.0274587	0.152	0.0116692	0.271
SHF_ 45172146_ 45172318_ 45172148_ 45172318_ 45171882_ 45172002	A5	ENSG00000138606,19	SHF	chr15	1	0.041	0.0325483	-0.319	0.0622204	-0.36
SLC26A6_ 48631223_ 48631306_ 48631252_ 48631306_ 48630992_ 48631140	A5	ENSG00000225697,12	SLC26A6	chr3	0.599472	-0.145	0.0252485	-0.229	0.869456	-0.085
SPEG_219443107_219443637_219443107_219443150_219444652_219444742	A5	ENSG00000072195,14	SPEG	chr2	1	-0.1	0.0140387	-0.365	1	-0.266
SUV39H2_ 14896845_ 14897517_ 14896845_ 14896977_ 14899538_ 14899685	A5	ENSG00000152455,15	SUV39H2	chr10	1	0.097	0.287366	-0.076	0.0341669	-0.173
TATDN1_124504270_124504347_124504274_124504347_124503839_124503951	A5	ENSG00000147687,18	TATDN1	chr8	1	-0.406	0.000383327	-0.656	0.950418	-0.25
TAZ_154413206_154413358_154413206_154413339_154413481_154413567	A5	ENSG00000102125,15	TAZ	chrX	1	-0.013	0.0171537	-0.377	0.0409609	-0.363
TBC1D7_ 13328315_ 13328531_ 13328455_ 13328531_ 13326786_ 13326906	A5	ENSG00000145979,17	TBC1D7	chr6	0.535621	0.233	1	-0.043	0.0113354	-0.276
THAP9_ 82904735_ 82904941_ 82904735_ 82904931_ 82906323_ 82906627	A5	ENSG00000168152,12	THAP9	chr4	0.170256	0.222	0.00415692	0.289	1	0.067
TMEM218_125102636_125102809_125102733_125102809_125101200_125101303	A5	ENSG00000150433,9	TMEM218	chr11	0.250068	-0.215	1	-0.054	0.00321762	0.161
TRIM16_ 15682853_ 15682951_ 15682860_ 15682951_ 15680864_ 15680953	A5	ENSG00000221926,12	TRIM16	chr17	1	-0.095	0.266748	0.06	0.00389981	0.155
TRMT10B_ 37763628_ 37763865_ 37763628_ 37763753_ 37768075_ 37768228	A5	ENSG00000165275,9	TRMT10B	chr9	1	0.06	0.581122	-0.084	0.0476456	-0.144
TTPAL_ 44484336_ 44484530_ 44484336_ 44484428_ 44486595_ 44486706	A5	ENSG00000124120,10	TTPAL	chr20	1	-0.068	0.0120172	-0.237	0.0904245	-0.169
TVP23C-CDRT4_ 15553684_ 15553829_ 15553764_ 15553829_ 15547058_ 15547148	A5	ENSG00000259024,6	TVP23C-CDRT4	chr17	1	0.048	0.0167769	0.306	0.197754	0.258
TWNK_100990868_100991054_100990868_100991010_100993189_100994401	A5	ENSG00000107815,9	TWNK	chr10	0.996334	-0.049	0.268595	0.073	0.0165056	0.122
UBE2T_202335641_202335818_202335645_202335818_202333449_202333555	A5	ENSG00000077152,10	UBE2T	chr1	0.708438	-0.062	0.926057	0.229	0.00128228	0.291
UBL7-AS1_ 74461882_ 74462031_ 74461882_ 74462027_ 74466035_ 74466130	A5	ENSG00000247240,7	UBL7-AS1	chr15	0.753147	0.141	0.00181144	0.469	0.0451454	0.328
VEGFA_ 43780731_ 43780854_ 43780731_ 43780785_ 43781955_ 43782087	A5	ENSG00000112715,21	VEGFA	chr6	1	0.3	0.000805909	-0.7	1	-1
VPS29_110499456_110499546_110499534_110499546_110496011_110496203	A5	ENSG00000111237,18	VPS29	chr12	0.236763	0.071	0.537217	-0.077	0.00454993	-0.149
VPS29_110499456_110499546_110499534_110499546_110498819_110498859	A5	ENSG00000111237,18	VPS29	chr12	1	-0.104	0.0127356	-0.424	1	-0.32
WBP1_ 74458831_ 74459117_ 74458831_ 74458919_ 74459642_ 74459745	A5	ENSG00000239779,6	WBP1	chr2	1	-0.13	0.106756	0.112	0.0165056	0.242
ZNF101_ 19677863_ 19677990_ 19677863_ 19677986_ 19678725_ 19678786	A5	ENSG00000181896,11	ZNF101	chr19	0.821411	-0.072	0.155169	0.257	0.015539	0.329
ZNF610_ 52347706_ 52347944_ 52347706_ 52347831_ 52349153_ 52349235	A5	ENSG00000167554,14	ZNF610	chr19	1	0.118	0.0908685	-0.157	0.0102753	-0.275
FUK_ 70466881_ 70467471_ 70466881_ 70466954_ 70468848_ 70468968	A5	ENSG00000157353,16	FUK	chr16	NA	NA	1	0.802	3.36612e-05	0.802
AC006001,3_ 66576754_ 66576929_ 66588511_ 66588580_ 66573384_ 66573550_ 66592256_ 66592397	MXE	ENSG00000229180,7	AC006001,3	chr7	NA	NA	0.0402153	-0.159	0.00129695	-0.269
AC011530,1_ 45782192_ 45782250_ 45784640_ 45784715_ 45779777_ 45779869_ 45785593_ 45785713	MXE	ENSG00000268434,5	AC011530,1	chr19	0.406877	0.174	0.0497633	0.235	NA	NA
AC012313,3_ 58357951_ 58358286_ 58358488_ 58358585_ 58357584_ 58357649_ 58359196_ 58359323	MXE	ENSG00000268230,5	AC012313,3	chr19	1	0.839	NA	NA	3.69144e-09	-1
AC013394,1_ 92901166_ 92901299_ 92924320_ 92924552_ 92892003_ 92892072_ 92927243_ 92927330	MXE	ENSG00000279765,3	AC013394,1	chr15	0.0262819	0.101	NA	NA	0.241432	-0.09
AC068547,1_151860710_151860820_151870530_151870611_151855223_151855375_151872416_151872493	MXE	ENSG00000283228,1	AC068547,1	chr2	0.0418735	0.339	1	0.112	NA	NA
AC092718,3_ 81087600_ 81087664_ 81090600_ 81090680_ 81084462_ 81084594_ 81096130_ 81096233	MXE	ENSG00000260643,2	AC092718,3	chr16	0.00571145	0.131	0.0339996	0.124	1	-0.007
AC104472,3_155833467_155833585_155833856_155834041_155829687_155829903_155842431_155842997	MXE	ENSG00000284952,1	AC104472,3	chr3	0.673424	0.137	0.044954	0.231	0.787426	0.094
AC104472,3_155833856_155834041_155842431_155842997_155829687_155829903_155853222_155854442	MXE	ENSG00000284952,1	AC104472,3	chr3	3.40577e-06	-0.689	0.427321	-0.022	0.221189	0.667
AC118549,1_ 77631849_ 77633405_ 77639448_ 77639602_ 77584516_ 77584655_ 77641383_ 77641446	MXE	ENSG00000036549,12	AC118549,1	chr1	0.00817797	-0.104	0.465287	-0.037	NA	NA
AC118553,2_100015301_100015420_100043072_100043229_100011364_100011533_100049908_100050004	MXE	ENSG00000283761,1	AC118553,2	chr1	0.00245211	-0.196	0.042439	-0.165	0.756365	0.031
AC245100,4_148424062_148424189_148424626_148424678_148420371_148420607_148425505_148425664	MXE	ENSG00000231551,8	AC245100,4	chr1	1	-0.139	0.0268619	0.527	1	0.667
ACAD8_134257087_134257257_134258514_134258624_134256547_134256648_134259007_134259084	MXE	ENSG00000151498,11	ACAD8	chr11	0.490909	-0.123	0.0452641	-0.175	0.903448	-0.052
ACADM_ 75728400_ 75728488_ 75732643_ 75732741_ 75724705_ 75724817_ 75732852_ 75732922	MXE	ENSG00000117054,13	ACADM	chr1	0.0302565	0.124	0.0223019	0.127	1	0.002
ACTR10_ 58207935_ 58208018_ 58215204_ 58215284_ 58202854_ 58202927_ 58219693_ 58219729	MXE	ENSG00000131966,13	ACTR10	chr14	NA	NA	0.00773492	0.201	NA	NA
ACTR10_ 58215204_ 58215284_ 58219693_ 58219729_ 58208998_ 58209107_ 58223621_ 58223701	MXE	ENSG00000131966,13	ACTR10	chr14	NA	NA	0.0139958	0.102	1	0.019
ADAL_ 43335695_ 43335826_ 43336625_ 43336686_ 43334937_ 43335170_ 43340264_ 43340352	MXE	ENSG00000168803,15	ADAL	chr15	0.0329634	0.219	0.903377	0.035	0.321022	-0.185
ADCYAP1R1_ 31095666_ 31095750_ 31100126_ 31100210_ 31092643_ 31092735_ 31103236_ 31103366	MXE	ENSG00000078549,14	ADCYAP1R1	chr7	0.763138	-0.314	0.0116666	0.316	0.000981522	0.63
ADGRE5_ 14407060_ 14407229_ 14407907_ 14408009_ 14406868_ 14406960_ 14408091_ 14408275	MXE	ENSG00000123146,19	ADGRE5	chr19	1	0.01	0.00461404	0.106	0.0807824	0.096
AGBL3_134989249_134989310_134993492_134993678_134987888_134987996_135010041_135012511	MXE	ENSG00000146856,14	AGBL3	chr7	NA	NA	0.0145542	-0.299	0.578598	-0.179
AGPAT4_161154148_161154310_161166247_161166417_161153345_161153499_161232035_161232302	MXE	ENSG00000026652,13	AGPAT4	chr6	0.0330708	0.235	7.07213e-05	0.234	1	-0.001
AHI1_135495813_135495898_135497187_135497249_135492227_135492291_135497582_135497740	MXE	ENSG00000135541,20	AHI1	chr6	0.0208665	-0.488	0.957116	-0.061	0.511424	0.427
AL109827,1_ 35632794_ 35632923_ 35655201_ 35655344_ 35632516_ 35632696_ 35658929_ 35659014	MXE	ENSG00000272897,5	AL109827,1	chr20	0.632684	0.062	0.0297718	0.116	0.555624	0.054
ALAD_113392118_113392169_113393446_113393634_113391526_113391623_113401211_113401258	MXE	ENSG00000148218,15	ALAD	chr9	1	0.017	0.0316648	0.215	NA	NA
ALG8_ 78106806_ 78106946_ 78112649_ 78112770_ 78104355_ 78104453_ 78113885_ 78113989	MXE	ENSG00000159063,12	ALG8	chr11	NA	NA	0.0444361	0.136	0.127744	0.11
ANKRD11_ 89316932_ 89317075_ 89418283_ 89418368_ 89305205_ 89305344_ 89490244_ 89490320	MXE	ENSG00000167522,15	ANKRD11	chr16	0.589687	0.065	0.0489117	0.133	NA	NA
ANKRD27_ 32607634_ 32607832_ 32615657_ 32615780_ 32605834_ 32605954_ 32617588_ 32617633	MXE	ENSG00000105186,15	ANKRD27	chr19	0.799727	-0.114	0.0489117	-0.203	NA	NA
ANKZF1_219234825_219235312_219235473_219235585_219234132_219234288_219235707_219235875	MXE	ENSG00000163516,13	ANKZF1	chr2	0.0194367	-0.209	NA	NA	1	0.028
ANXA2_ 60390212_ 60390317_ 60396150_ 60396427_ 60386027_ 60386086_ 60397257_ 60397338	MXE	ENSG00000182718,16	ANXA2	chr15	0.195131	-0.13	0.620367	-0.342	0.048214	-0.212
AP3S1_115866669_115866761_115870016_115870128_115841480_115842106_115895086_115895158	MXE	ENSG00000177879,15	AP3S1	chr5	0.783915	0.047	0.0171241	0.109	0.373346	0.062
AREL1_ 74669946_ 74670126_ 74670761_ 74670871_ 74669648_ 74669774_ 74671407_ 74671483	MXE	ENSG00000119682,16	AREL1	chr14	0.42036	-0.092	0.00397137	-0.173	0.456046	-0.081
ARHGDIA_ 81869329_ 81869406_ 81869541_ 81869625_ 81869172_ 81869236_ 81869740_ 81869957	MXE	ENSG00000141522,11	ARHGDIA	chr17	0.375379	-0.057	0.0031993	-0.104	0.513606	-0.047
ARL3_102689892_102689943_102699372_102699489_102685815_102686001_102705345_102705489	MXE	ENSG00000138175,8	ARL3	chr10	0.748977	0.047	0.00602956	0.132	0.38942	0.084
ARMC1_ 65605421_ 65605538_ 65613243_ 65613433_ 65605262_ 65605337_ 65622262_ 65622354	MXE	ENSG00000104442,9	ARMC1	chr8	0.182445	0.105	9.30871e-06	0.207	0.0807824	0.102
ARMCX5-GPRASP2_102601463_102601509_102605481_102605653_102599705_102599859_102713781_102713849	MXE	ENSG00000271147,7	ARMCX5-GPRASP2	chrX	NA	NA	1	0.095	0.0209361	0.193
ATG4B_241651883_241651974_241653306_241653369_241651263_241651335_241653511_241653610	MXE	ENSG00000168397,16	ATG4B	chr2	0.0174489	-0.145	1	0.006	0.00787116	0.151
ATG7_ 11313303_ 11313420_ 11315343_ 11315493_ 11308983_ 11309061_ 11340644_ 11340735	MXE	ENSG00000197548,12	ATG7	chr3	1	0.075	0.00570636	0.147	0.354774	0.072
ATP5MC2_ 53669870_ 53669948_ 53672575_ 53672645_ 53665165_ 53665428_ 53676052_ 53676325	MXE	ENSG00000135390,18	ATP5MC2	chr12	NA	NA	0.0480845	0.167	1	-0.199
BBOF1_ 74046059_ 74046130_ 74049701_ 74050195_ 74040564_ 74040645_ 74055583_ 74055685	MXE	ENSG00000119636,15	BBOF1	chr14	0.0100914	0.491	NA	NA	0.692693	-0.105
BCAS3_ 61380505_ 61380571_ 61388617_ 61388708_ 61368326_ 61368494_ 61391976_ 61392831	MXE	ENSG00000141376,22	BCAS3	chr17	1	-0.29	0.046783	-0.381	NA	NA
C11orf58_ 16744600_ 16744684_ 16752784_ 16752894_ 16738400_ 16738841_ 16754870_ 16756223	MXE	ENSG00000110696,9	C11orf58	chr11	NA	NA	0.0289287	0.124	NA	NA
C11orf80_ 66748378_ 66748517_ 66756352_ 66756505_ 66744735_ 66744919_ 66759042_ 66759096	MXE	ENSG00000173715,16	C11orf80	chr11	0.49475	0.366	0.604771	-0.153	0.048214	-0.519
C11orf95_ 63764037_ 63764598_ 63764867_ 63765254_ 63759891_ 63763869_ 63765806_ 63766304	MXE	ENSG00000188070,9	C11orf95	chr11	0.361116	0.233	0.0106327	0.262	0.258141	0.028
CASK_ 41555599_ 41555635_ 41557031_ 41557100_ 41553718_ 41553915_ 41559778_ 41559847	MXE	ENSG00000147044,21	CASK	chrX	0.0270449	-0.108	1	-0.008	0.0208911	0.1
CAST_ 96729611_ 96729725_ 96736171_ 96736240_ 96727488_ 96727530_ 96737848_ 96737947	MXE	ENSG00000153113,23	CAST	chr5	NA	NA	0.00570273	0.109	0.923796	0.007
CBWD1_ 146101_ 146158_ 152033_ 152078_ 134978_ 135030_ 154708_ 154795	MXE	ENSG00000172785,18	CBWD1	chr9	0.0365625	-0.469	0.17163	-0.484	0.546139	-0.014
CCDC136_128815613_128815931_128817757_128817864_128814637_128814919_128821798_128822130	MXE	ENSG00000128596,16	CCDC136	chr7	0.0072262	-0.251	0.402159	-0.148	NA	NA
CCDC138_108856793_108856970_108873450_108873589_108846737_108846930_108876087_108876578	MXE	ENSG00000163006,11	CCDC138	chr2	1	-0.054	0.0482654	-0.251	0.0854925	-0.197
CCDC88A_ 55349517_ 55349599_ 55355578_ 55355751_ 55346174_ 55346333_ 55362307_ 55362448	MXE	ENSG00000115355,16	CCDC88A	chr2	0.42036	0.074	0.00602956	0.18	0.281714	0.106
CCNL1_157151485_157151591_157151728_157151930_157150281_157150381_157152176_157152241	MXE	ENSG00000163660,11	CCNL1	chr3	NA	NA	9.83016e-06	0.53	1.58883e-05	0.53
CCNL1_157151485_157151591_157151916_157151930_157150281_157150381_157152176_157152241	MXE	ENSG00000163660,11	CCNL1	chr3	NA	NA	1.30836e-09	0.802	1	0.802
CDC25C_138289500_138289563_138290638_138290740_138287168_138287267_138291969_138292116	MXE	ENSG00000158402,19	CDC25C	chr5	0.286732	-0.148	0.871317	0.051	0.0392941	0.198
CDC25C_138291969_138292116_138319218_138319374_138287168_138287267_138326020_138326054	MXE	ENSG00000158402,19	CDC25C	chr5	0.00245211	0.642	NA	NA	NA	NA
CDK2_ 55968777_ 55968948_ 55969474_ 55969576_ 55968048_ 55968169_ 55971043_ 55971099	MXE	ENSG00000123374,10	CDK2	chr12	0.929672	0.038	0.0328945	0.142	NA	NA
CDK4_ 57750655_ 57750765_ 57751499_ 57751736_ 57749453_ 57749504_ 57752174_ 57752326	MXE	ENSG00000135446,16	CDK4	chr12	NA	NA	0.00305391	0.113	0.0172488	0.082
CENPK_ 65542801_ 65542848_ 65551563_ 65551636_ 65529116_ 65529199_ 65552492_ 65552549	MXE	ENSG00000123219,12	CENPK	chr5	0.802697	0.059	0.0494603	0.134	NA	NA
CHD1L_147280025_147280191_147284350_147284499_147276103_147276257_147285323_147285487	MXE	ENSG00000131778,18	CHD1L	chr1	0.375379	-0.08	0.306028	0.053	0.00455436	0.133
CHD2_ 92998148_ 92998261_ 92998498_ 92998621_ 92997252_ 92997403_ 93000511_ 93000640	MXE	ENSG00000173575,20	CHD2	chr15	0.0154276	-0.112	NA	NA	0.807462	-0.021
CLHC1_ 55206817_ 55206940_ 55208625_ 55208710_ 55206269_ 55206376_ 55209403_ 55209516	MXE	ENSG00000162994,15	CLHC1	chr2	0.730317	-0.208	NA	NA	0.0247713	0.399
CLN6_ 68211555_ 68211643_ 68211674_ 68211921_ 68211262_ 68211318_ 68214289_ 68214388	MXE	ENSG00000128973,12	CLN6	chr15	0.534809	-0.077	0.0494603	-0.115	0.709105	-0.038
CNIH4_224365878_224365991_224371282_224371423_224360494_224360563_224375794_224379452	MXE	ENSG00000143771,11	CNIH4	chr1	0.170989	0.102	0.000479213	0.194	0.0712194	0.092
COA1_ 43650611_ 43650712_ 43657215_ 43657269_ 43648599_ 43648652_ 43665657_ 43665722	MXE	ENSG00000106603,18	COA1	chr7	0.0830972	-0.335	0.62527	0.115	0.00239337	0.45
CREM_ 35179133_ 35179276_ 35201450_ 35201486_ 35148367_ 35148491_ 35206894_ 35207051	MXE	ENSG00000095794,19	CREM	chr10	0.0262819	-0.167	0.0750336	-0.13	NA	NA
CRLS1_ 6026170_ 6026238_ 6028671_ 6028725_ 6015360_ 6015490_ 6031284_ 6031370	MXE	ENSG00000088766,11	CRLS1	chr20	9.16856e-09	0.734	1	0.71	NA	NA
CSNK2A1_ 492253_ 492364_ 495718_ 495802_ 489779_ 489881_ 497720_ 497780	MXE	ENSG00000101266,18	CSNK2A1	chr20	0.659391	0.044	0.0166766	0.13	0.231307	0.086
CTDSP2_ 57826345_ 57826402_ 57826995_ 57827097_ 57824226_ 57824319_ 57827551_ 57827590	MXE	ENSG00000175215,10	CTDSP2	chr12	0.137757	-0.1	0.662508	0.053	0.0141812	0.154
CTTN_ 70415662_ 70415717_ 70417012_ 70417123_ 70414541_ 70414652_ 70419745_ 70419856	MXE	ENSG00000085733,15	CTTN	chr11	0.825993	-0.041	0.0157092	-0.119	NA	NA
CUEDC1_ 57869121_ 57869193_ 57871285_ 57871369_ 57868149_ 57868243_ 57872662_ 57872855	MXE	ENSG00000180891,12	CUEDC1	chr17	0.755419	-0.069	0.0316648	-0.155	0.402836	-0.086
D2HGDH_241750150_241750294_241754630_241754746_241744708_241744877_241755044_241756014	MXE	ENSG00000180902,17	D2HGDH	chr2	0.0269433	-0.157	0.68608	-0.054	NA	NA
DAB2_ 39382617_ 39383271_ 39388304_ 39388367_ 39381453_ 39381616_ 39388798_ 39388852	MXE	ENSG00000153071,14	DAB2	chr5	1	0.227	0.00305391	-0.44	1	-0.667
DAGLB_ 6436361_ 6436533_ 6445952_ 6446104_ 6432836_ 6432959_ 6447747_ 6447932	MXE	ENSG00000164535,14	DAGLB	chr7	0.405244	-0.052	0.000479213	-0.123	0.331292	-0.071
DAP3_155721516_155721618_155725381_155725411_155709772_155709824_155725991_155726019	MXE	ENSG00000132676,15	DAP3	chr1	0.02951	-0.286	0.0125387	-0.231	1	0.055
DAP3_155727607_155727738_155729041_155729122_155725926_155726019_155729207_155729366	MXE	ENSG00000132676,15	DAP3	chr1	0.28684	0.068	0.00799318	0.133	0.439531	0.065
DARS_135961395_135961498_135979273_135979366_135943178_135943480_135983396_135983454	MXE	ENSG00000115866,10	DARS	chr2	0.716003	0.064	0.0307985	0.11	NA	NA
DARS_135979273_135979366_135983396_135983454_135961395_135961498_135985402_135985563	MXE	ENSG00000115866,10	DARS	chr2	1	0.02	0.0316648	0.114	0.178233	0.094
DCLRE1C_ 14945434_ 14945565_ 14947524_ 14947609_ 14945104_ 14945189_ 14949035_ 14949087	MXE	ENSG00000152457,17	DCLRE1C	chr10	0.581599	0.182	0.561233	-0.2	0.00033683	-0.382
DDX56_ 44570014_ 44570128_ 44570757_ 44570877_ 44569808_ 44569903_ 44571491_ 44571736	MXE	ENSG00000136271,10	DDX56	chr7	NA	NA	0.0145542	0.175	0.130285	0.141
DEPDC5_ 31806121_ 31806191_ 31809610_ 31809647_ 31804841_ 31804915_ 31810520_ 31810641	MXE	ENSG00000100150,17	DEPDC5	chr22	1	0.018	NA	NA	0.045303	-0.395
DHX35_ 38988792_ 38988917_ 38991453_ 38991515_ 38983698_ 38983776_ 38992355_ 38992425	MXE	ENSG00000101452,14	DHX35	chr20	0.0364238	-0.185	NA	NA	0.0905649	0.171
DLST_ 74889274_ 74889349_ 74889896_ 74889952_ 74889094_ 74889147_ 74891055_ 74891167	MXE	ENSG00000119689,14	DLST	chr14	0.115928	0.105	0.00627768	0.196	NA	NA
DOLPP1_129085022_129085107_129085206_129085306_129084667_129084768_129085517_129085616	MXE	ENSG00000167130,17	DOLPP1	chr9	0.863947	-0.072	NA	NA	0.0157363	0.212
DONSON_ 33583487_ 33583666_ 33584589_ 33584768_ 33582164_ 33582246_ 33587521_ 33587602	MXE	ENSG00000159147,17	DONSON	chr21	0.992308	0.024	5.76229e-05	0.122	NA	NA
DONSON_ 33584589_ 33584768_ 33585977_ 33586060_ 33579349_ 33579562_ 33587521_ 33587602	MXE	ENSG00000159147,17	DONSON	chr21	0.0257362	0.438	2.38885e-05	0.52	NA	NA
DONSON_ 33584589_ 33584768_ 33585977_ 33586181_ 33582164_ 33582246_ 33587521_ 33587602	MXE	ENSG00000159147,17	DONSON	chr21	1	0.011	0.0110333	-0.103	NA	NA
DPH5_100995109_100995149_101001466_101001544_100992636_100992740_101021640_101021765	MXE	ENSG00000117543,20	DPH5	chr1	0.967402	0.036	0.0449629	0.122	NA	NA
DRAXIN_ 11706248_ 11706709_ 11709274_ 11709465_ 11691728_ 11691853_ 11711850_ 11711965	MXE	ENSG00000162490,6	DRAXIN	chr1	0.079102	0.198	0.00296216	0.236	NA	NA
DRG1_ 31400619_ 31400743_ 31411011_ 31411081_ 31399522_ 31399725_ 31420255_ 31420425	MXE	ENSG00000185721,12	DRG1	chr22	NA	NA	0.0210036	0.135	0.00559142	0.156
DUXAP9_ 19068076_ 19068214_ 19068432_ 19068568_ 19066235_ 19066347_ 19092915_ 19093006	MXE	ENSG00000225210,10	DUXAP9	chr14	0.0929659	0.235	NA	NA	0.00228337	-0.555
DUXAP9_ 19068432_ 19068568_ 19092915_ 19093006_ 19066235_ 19066347_ 19130635_ 19131167	MXE	ENSG00000225210,10	DUXAP9	chr14	0.206259	-0.108	NA	NA	0.0191786	0.12
DUXAP9_ 19068432_ 19068568_ 19092915_ 19093006_ 19068076_ 19068214_ 19130635_ 19131167	MXE	ENSG00000225210,10	DUXAP9	chr14	0.51856	-0.118	0.235735	0.044	0.0156445	0.162
EGF_109994732_109994880_109999678_109999846_109988583_109988709_110004504_110004622	MXE	ENSG00000138798,11	EGF	chr4	NA	NA	0.00159467	-0.313	0.311489	-0.135
EGFL7_136670949_136671014_136671925_136672088_136670168_136670330_136672263_136672677	MXE	ENSG00000172889,15	EGFL7	chr9	0.320184	0.13	0.0435003	0.164	NA	NA
ELF2_139116648_139116807_139125163_139125329_139073453_139073567_139137629_139137867	MXE	ENSG00000109381,19	ELF2	chr4	0.106472	0.153	NA	NA	0.00129695	-0.182
ETV4_ 43536425_ 43536479_ 43544974_ 43545022_ 43533858_ 43533985_ 43545273_ 43545367	MXE	ENSG00000175832,12	ETV4	chr17	0.918026	-0.042	0.00865901	-0.166	NA	NA
FAM149A_186149565_186149704_186151902_186152045_186149172_186149283_186153644_186153770	MXE	ENSG00000109794,13	FAM149A	chr4	0.251354	0.278	0.0171241	0.358	NA	NA
FAM149A_186149592_186149704_186151902_186152045_186149172_186149283_186153644_186153770	MXE	ENSG00000109794,13	FAM149A	chr4	0.0703573	0.34	0.037604	0.353	NA	NA
FAM45A_119104763_119105006_119105310_119105495_119104116_119104197_119107967_119108164	MXE	ENSG00000119979,17	FAM45A	chr10	0.462101	0.213	0.306095	-0.082	0.00392591	-0.295
FAM45A_119104763_119105022_119105310_119105495_119104094_119104197_119107967_119108164	MXE	ENSG00000119979,17	FAM45A	chr10	0.440601	0.224	0.344804	-0.064	0.00411136	-0.288
FASTK_151076912_151077027_151077100_151077236_151076623_151076832_151077309_151077401	MXE	ENSG00000164896,19	FASTK	chr7	0.499544	0.06	0.0468021	0.103	0.646601	0.044
FAXDC2_154834842_154834934_154838130_154838178_154823386_154823592_154850482_154850603	MXE	ENSG00000170271,10	FAXDC2	chr5	NA	NA	0.00159467	0.276	0.0290064	0.128
FCHSD1_141642396_141642503_141643000_141643088_141641701_141641757_141644217_141644438	MXE	ENSG00000197948,10	FCHSD1	chr5	0.0300335	-0.063	0.861005	0.117	0.00757892	0.179
FDXR_ 74866445_ 74866568_ 74866783_ 74866879_ 74866130_ 74866244_ 74872035_ 74872133	MXE	ENSG00000161513,11	FDXR	chr17	0.0141555	-0.152	0.00113326	-0.133	1	0.019
FPGS_127806972_127807087_127807208_127807286_127804635_127804700_127807420_127807482	MXE	ENSG00000136877,14	FPGS	chr9	0.29088	-0.08	0.00758635	-0.125	0.627936	-0.045
FRMD8_ 65389360_ 65389528_ 65393572_ 65393674_ 65387036_ 65387121_ 65394040_ 65394099	MXE	ENSG00000126391,13	FRMD8	chr11	0.557305	-0.141	0.042439	-0.217	0.678554	-0.076
GABARAPL1_ 10213835_ 10214187_ 10214668_ 10214779_ 10212896_ 10213219_ 10218062_ 10218141	MXE	ENSG00000139112,10	GABARAPL1	chr12	1	-0.01	0.00119092	-0.639	NA	NA
GALNT7_173295763_173295843_173298114_173298297_173295395_173295526_173302046_173302164	MXE	ENSG00000109586,11	GALNT7	chr4	1	0.025	0.0208479	0.128	NA	NA
GCSH_ 81084462_ 81084594_ 81087600_ 81087664_ 81081937_ 81082963_ 81090600_ 81090680	MXE	ENSG00000140905,10	GCSH	chr16	0.0302565	0.108	0.00446751	0.121	0.994226	0.013
GK_ 30665510_ 30665584_ 30668011_ 30668118_ 30653358_ 30653615_ 30677374_ 30677452	MXE	ENSG00000198814,12	GK	chrX	0.88134	0.164	0.0417517	0.282	NA	NA
GLS_190913192_190913364_190920214_190920248_190910262_190910321_190921023_190921056	MXE	ENSG00000115419,12	GLS	chr2	0.886375	0.09	0.0108165	-0.299	0.00686605	-0.389
GNB1L_ 19806658_ 19806757_ 19812284_ 19812447_ 19801998_ 19802216_ 19854442_ 19854816	MXE	ENSG00000185838,13	GNB1L	chr22	0.0165627	-0.201	NA	NA	0.00481155	0.219
GRB10_ 50710874_ 50710990_ 50726012_ 50726035_ 50703820_ 50703908_ 50727792_ 50727890	MXE	ENSG00000106070,18	GRB10	chr7	0.0427712	0.11	1	-0.038	NA	NA
GRTP1_113325660_113325846_113325918_113326091_113324189_113324577_113344862_113344959	MXE	ENSG00000139835,13	GRTP1	chr13	0.0110316	0.572	0.454673	0.318	NA	NA
GSN_121283318_121283392_121297765_121297842_121281471_121281562_121300055_121300126	MXE	ENSG00000148180,19	GSN	chr9	NA	NA	0.00536849	-0.601	NA	NA
GTDC1_143970652_143970762_144007181_144007535_143952772_143952843_144141881_144142055	MXE	ENSG00000121964,14	GTDC1	chr2	1	0.014	0.0454379	-0.139	0.0754257	-0.153
GTF2A2_ 59650668_ 59650773_ 59652205_ 59652326_ 59642135_ 59642262_ 59657405_ 59657520	MXE	ENSG00000140307,10	GTF2A2	chr15	0.481132	0.066	0.0452641	0.119	0.638802	0.052
HACD1_ 17599289_ 17599411_ 17603929_ 17604047_ 17594204_ 17594383_ 17617082_ 17617377	MXE	ENSG00000165996,13	HACD1	chr10	0.0456947	-0.196	0.0489117	-0.163	1	0.033
HACE1_104833041_104833173_104843222_104843298_104796928_104797025_104849141_104849246	MXE	ENSG00000085382,11	HACE1	chr6	1	-0.048	0.000479213	-0.353	0.00810397	-0.305
HACE1_104833041_104833173_104849141_104849246_104796928_104797025_104850906_104850996	MXE	ENSG00000085382,11	HACE1	chr6	0.19364	-0.116	0.0408505	-0.246	NA	NA
HAUS2_ 42558197_ 42558290_ 42559338_ 42559408_ 42548827_ 42548965_ 42561269_ 42561402	MXE	ENSG00000137814,10	HAUS2	chr15	1	0.017	0.0356736	0.225	0.12663	0.209
HFM1_ 91316390_ 91316476_ 91319077_ 91319209_ 91316100_ 91316184_ 91319292_ 91319390	MXE	ENSG00000162669,15	HFM1	chr1	0.0102528	0.509	1	0.777	1	0.268
HMBS_119092124_119092163_119092403_119092523_119091412_119091526_119092757_119092811	MXE	ENSG00000256269,8	HMBS	chr11	0.289371	0.094	0.0328945	0.122	0.843192	0.028
HNRNPUL2_ 62723913_ 62723990_ 62724290_ 62724426_ 62723586_ 62723726_ 62726618_ 62727472	MXE	ENSG00000214753,3	HNRNPUL2	chr11	0.75337	0.038	0.010328	0.109	NA	NA
HSPB11_ 53928371_ 53928440_ 53930038_ 53930145_ 53923532_ 53923947_ 53939984_ 53940097	MXE	ENSG00000081870,11	HSPB11	chr1	0.933325	0.042	0.0343505	0.137	NA	NA
HTT_ 3086938_ 3087022_ 3099273_ 3099394_ 3074680_ 3075088_ 3103823_ 3103883	MXE	ENSG00000197386,12	HTT	chr4	0.39443	0.154	0.00210111	0.258	NA	NA
IFI44_ 78660553_ 78660654_ 78662703_ 78662878_ 78659311_ 78659483_ 78663764_ 78664078	MXE	ENSG00000137965,10	IFI44	chr1	0.712867	0.083	0.040375	0.147	0.826313	0.064
IL17RB_ 53856843_ 53856986_ 53857615_ 53858818_ 53852870_ 53852997_ 53860129_ 53860228	MXE	ENSG00000056736,9	IL17RB	chr3	1	0.05	0.00192293	0.335	NA	NA
INTS10_ 19819572_ 19819676_ 19820378_ 19820518_ 19818274_ 19818342_ 19822438_ 19822520	MXE	ENSG00000104613,11	INTS10	chr8	1	0.005	0.0059304	0.136	0.0156445	0.131
INTS7_211952568_211952701_211975165_211975372_211946606_211946705_211976581_211976658	MXE	ENSG00000143493,12	INTS7	chr1	0.382217	0.107	0.0292277	0.171	NA	NA
IPCEF1_154247448_154247488_154265911_154265964_154246590_154246760_154289712_154289756	MXE	ENSG00000074706,13	IPCEF1	chr6	NA	NA	0.0203982	0.29	0.733487	0.173
JPT1_ 75147555_ 75147653_ 75148528_ 75148671_ 75146665_ 75146684_ 75154341_ 75154683	MXE	ENSG00000189159,15	JPT1	chr17	0.38589	0.069	4.53953e-05	0.172	NA	NA
KDM3B_138420705_138420962_138424074_138424341_138418952_138419232_138425410_138425582	MXE	ENSG00000120733,13	KDM3B	chr5	0.0449269	0.125	0.0296433	0.129	1	0.004
KIAA0586_ 58440069_ 58440160_ 58441220_ 58441343_ 58432387_ 58432457_ 58442705_ 58442880	MXE	ENSG00000100578,14	KIAA0586	chr14	0.863947	0.093	0.0176605	-0.241	0.0863336	-0.333
KIF21A_ 39315931_ 39315970_ 39318072_ 39318201_ 39311416_ 39311553_ 39319905_ 39320013	MXE	ENSG00000139116,18	KIF21A	chr12	1	-0.01	0.0316648	-0.211	0.0558263	-0.201
KIFC3_ 57785463_ 57785666_ 57788574_ 57788713_ 57772222_ 57772288_ 57794998_ 57795141	MXE	ENSG00000140859,15	KIFC3	chr16	0.000615811	-0.664	0.00341388	-0.407	0.522031	0.257
KIFC3_ 57788574_ 57788713_ 57790929_ 57791066_ 57772222_ 57772288_ 57794998_ 57795141	MXE	ENSG00000140859,15	KIFC3	chr16	0.00117189	0.592	0.00192293	0.507	1	-0.085
LAPTM4B_ 97819139_ 97819238_ 97825057_ 97825153_ 97816057_ 97816180_ 97851396_ 97851474	MXE	ENSG00000104341,16	LAPTM4B	chr8	NA	NA	0.0120562	0.105	NA	NA
LDLR_ 11123173_ 11123344_ 11128007_ 11128085_ 11120369_ 11120522_ 11129512_ 11129670	MXE	ENSG00000130164,13	LDLR	chr19	1	0.02	0.0417517	0.123	0.267989	0.103
LIAS_ 39465284_ 39465342_ 39467517_ 39467646_ 39463524_ 39463605_ 39470018_ 39470164	MXE	ENSG00000121897,14	LIAS	chr4	0.0468132	-0.407	1	-0.08	0.0863336	0.326
LINC00511_ 72583043_ 72583138_ 72586653_ 72586825_ 72431127_ 72431224_ 72592202_ 72592692	MXE	ENSG00000227036,7	LINC00511	chr17	0.0137542	0.236	1	0.05	0.163189	-0.186
LINC01881_242094886_242095027_242114638_242114741_242088692_242088801_242118964_242119057	MXE	ENSG00000220804,8	LINC01881	chr2	0.575867	0.109	NA	NA	0.031557	-0.141
LRRFIP1_237727875_237727935_237739231_237739309_237708543_237708630_237748363_237748399	MXE	ENSG00000124831,18	LRRFIP1	chr2	NA	NA	0.00265566	0.667	NA	NA
LTBP1_ 33275800_ 33275923_ 33280038_ 33280158_ 33274964_ 33275090_ 33293159_ 33293282	MXE	ENSG00000049323,15	LTBP1	chr2	NA	NA	0.00570636	0.469	NA	NA
LTN1_ 28932469_ 28932664_ 28935108_ 28935329_ 28931154_ 28931322_ 28936525_ 28936697	MXE	ENSG00000198862,13	LTN1	chr21	1	-0.023	0.0193113	-0.176	0.204038	-0.153
LYPLA1_ 54052654_ 54052756_ 54055059_ 54055133_ 54051011_ 54051188_ 54062253_ 54062324	MXE	ENSG00000120992,17	LYPLA1	chr8	0.562296	0.067	0.00758635	0.144	0.325891	0.077
LYRM1_ 20915555_ 20915714_ 20920121_ 20920214_ 20900234_ 20900535_ 20923999_ 20925004	MXE	ENSG00000102897,9	LYRM1	chr16	0.682167	0.069	3.6983e-05	0.162	0.00941523	0.093
LYRM1_ 20915555_ 20915714_ 20920121_ 20920214_ 20900798_ 20900889_ 20923999_ 20924116	MXE	ENSG00000102897,9	LYRM1	chr16	0.366933	0.088	0.00627768	0.135	0.613512	0.047
MAMDC4_136858718_136858853_136859004_136859132_136858399_136858546_136859208_136859317	MXE	ENSG00000177943,13	MAMDC4	chr9	NA	NA	0.121181	0.212	0.0319666	0.348
MAP2_209690602_209690848_209692624_209696350_209680749_209680827_209700276_209700338	MXE	ENSG00000078018,19	MAP2	chr2	0.0734545	0.217	0.377339	-0.209	0.000902281	-0.426
MAP2_209690602_209690848_209692636_209696350_209680749_209680827_209700276_209700338	MXE	ENSG00000078018,19	MAP2	chr2	0.0631067	0.233	0.122371	-0.345	0.000387704	-0.578
MAPK10_ 86159297_ 86159467_ 86194335_ 86194407_ 86107222_ 86107352_ 86354529_ 86354644	MXE	ENSG00000109339,21	MAPK10	chr4	1	-0.001	0.042439	0.323	0.138827	0.325
MASTL_ 27167101_ 27167274_ 27169943_ 27171083_ 27165388_ 27165539_ 27173120_ 27173259	MXE	ENSG00000120539,14	MASTL	chr10	1	0.003	0.0307985	0.12	NA	NA
MCCC1_183072365_183072487_183086692_183086788_183071209_183071357_183094558_183094605	MXE	ENSG00000078070,12	MCCC1	chr3	0.575867	-0.071	0.027372	0.134	0.00019503	0.205
MED17_ 93796409_ 93796540_ 93796936_ 93797719_ 93793950_ 93794035_ 93801834_ 93801972	MXE	ENSG00000042429,11	MED17	chr11	0.00754557	0.161	0.341384	0.102	0.257304	-0.059
MEF2C_ 88760987_ 88761125_ 88761184_ 88761328_ 88751856_ 88752043_ 88804597_ 88804801	MXE	ENSG00000081189,15	MEF2C	chr5	1	-0.017	0.00505658	0.096	0.000493166	0.113
MEGF11_ 65909033_ 65909135_ 65912081_ 65912200_ 65906084_ 65906141_ 65913736_ 65913973	MXE	ENSG00000157890,17	MEGF11	chr15	1	0.07	0.00115628	0.327	NA	NA
MEGF8_ 42349498_ 42349699_ 42350147_ 42350384_ 42348271_ 42348472_ 42351215_ 42351334	MXE	ENSG00000105429,12	MEGF8	chr19	0.155999	-0.136	0.965679	0.022	0.0460685	0.158
MFSD14A_100049908_100050004_100058665_100058728_100038096_100038316_100059877_100060005	MXE	ENSG00000156875,13	MFSD14A	chr1	1	0.011	0.044954	0.123	NA	NA
MLC1_ 50079917_ 50080019_ 50080343_ 50080397_ 50077400_ 50077502_ 50083083_ 50083173	MXE	ENSG00000100427,15	MLC1	chr22	0.428234	-0.073	0.0171241	-0.129	0.440325	-0.056
MLH3_ 75038339_ 75038412_ 75039910_ 75040015_ 75032067_ 75032179_ 75041614_ 75041700	MXE	ENSG00000119684,15	MLH3	chr14	0.739032	0.083	0.221106	-0.168	0.0193742	-0.251
MPI_ 74892660_ 74892802_ 74896151_ 74896325_ 74891378_ 74891579_ 74897511_ 74897957	MXE	ENSG00000178802,17	MPI	chr15	0.0262819	0.114	NA	NA	NA	NA
MROH8_ 37119697_ 37119838_ 37120503_ 37120618_ 37115172_ 37115337_ 37120898_ 37121036	MXE	ENSG00000101353,14	MROH8	chr20	NA	NA	NA	NA	1.94117e-07	0.684
MRRF_122270863_122271075_122280442_122280598_122264655_122264938_122285168_122285287	MXE	ENSG00000148187,17	MRRF	chr9	0.0110316	0.109	0.0873648	0.081	0.78469	-0.028
MRRF_122280442_122280598_122285168_122285287_122270863_122271075_122291748_122291840	MXE	ENSG00000148187,17	MRRF	chr9	0.0692857	0.126	0.000833229	0.174	0.679373	0.047
MTHFD1_ 64411089_ 64411149_ 64412471_ 64412525_ 64400792_ 64400877_ 64415357_ 64415494	MXE	ENSG00000100714,15	MTHFD1	chr14	0.460978	0.082	0.0211265	0.148	0.53053	0.066
MTHFSD_ 86552032_ 86552146_ 86554644_ 86554748_ 86548463_ 86548577_ 86555168_ 86555235	MXE	ENSG00000103248,18	MTHFSD	chr16	0.0653664	-0.158	1	0.01	0.01025	0.168
MUC1_155187454_155187544_155187721_155187858_155187224_155187374_155188007_155188063	MXE	ENSG00000185499,16	MUC1	chr1	0.39902	-0.186	1	0.199	0.0246297	0.385
MUC1_155187454_155187576_155187721_155187858_155187224_155187374_155188007_155188063	MXE	ENSG00000185499,16	MUC1	chr1	0.52797	-0.128	1	0.168	0.0457242	0.296
N4BP1_ 48553538_ 48553669_ 48560753_ 48562444_ 48538725_ 48543261_ 48609774_ 48610209	MXE	ENSG00000102921,7	N4BP1	chr16	0.783198	-0.199	0.00575163	-0.292	NA	NA
N4BP2L2_ 32537005_ 32537027_ 32538617_ 32538684_ 32527457_ 32527532_ 32538777_ 32538885	MXE	ENSG00000244754,8	N4BP2L2	chr13	0.172111	0.095	1	-0.156	0.0133874	-0.251
NAA60_ 3476221_ 3476337_ 3479470_ 3479600_ 3448470_ 3448540_ 3482501_ 3482598	MXE	ENSG00000122390,18	NAA60	chr16	0.0210371	-0.119	0.0996233	-0.101	1	0.017
NAB1_190673100_190673152_190683737_190683827_190670325_190670459_190685478_190685638	MXE	ENSG00000138386,16	NAB1	chr2	0.849407	-0.044	0.000625822	-0.172	NA	NA
NADK2_ 36207169_ 36207265_ 36211843_ 36211922_ 36201105_ 36201161_ 36217747_ 36217884	MXE	ENSG00000152620,12	NADK2	chr5	0.405244	-0.178	0.0217094	-0.181	NA	NA
NAE1_ 66823528_ 66823600_ 66826522_ 66826583_ 66821449_ 66821559_ 66830846_ 66830955	MXE	ENSG00000159593,14	NAE1	chr16	0.0137542	0.505	1	-0.055	0.0100217	-0.56
NBPF12_146971182_146971394_146977465_146977671_146970646_146970719_146978958_146979010	MXE	ENSG00000268043,7	NBPF12	chr1	1	0.007	0.000582968	-0.285	NA	NA
NBPF9_149058924_149059097_149062092_149062265_149058163_149058215_149062861_149062913	MXE	ENSG00000269713,7	NBPF9	chr1	0.71112	0.171	0.579825	-0.167	0.0141895	-0.338
NCAPD2_ 6520985_ 6521110_ 6521797_ 6522037_ 6517778_ 6517959_ 6522827_ 6523002	MXE	ENSG00000010292,12	NCAPD2	chr12	0.849838	0.05	0.0480845	0.135	0.586968	0.085
NDUFS2_161212591_161212654_161213089_161213182_161212350_161212480_161213379_161213475	MXE	ENSG00000158864,12	NDUFS2	chr1	1	-0.035	1	-0.361	0.00757892	-0.325
NEO1_ 73298347_ 73298611_ 73301320_ 73301457_ 73289145_ 73289238_ 73302612_ 73302718	MXE	ENSG00000067141,16	NEO1	chr15	NA	NA	0.0124274	0.118	NA	NA
NLRC5_ 57028071_ 57028155_ 57029772_ 57029856_ 57025367_ 57027018_ 57029994_ 57030084	MXE	ENSG00000140853,15	NLRC5	chr16	0.0349055	0.338	NA	NA	0.124323	-0.1
NR2F1-AS1_ 93496056_ 93496103_ 93544794_ 93544915_ 93438702_ 93438741_ 93553760_ 93553863	MXE	ENSG00000237187,8	NR2F1-AS1	chr5	0.0212443	0.37	NA	NA	0.0157363	-0.37
NSUN5P2_ 72953325_ 72953430_ 72954358_ 72954479_ 72950057_ 72950196_ 72954624_ 72954717	MXE	ENSG00000106133,17	NSUN5P2	chr7	0.0812085	-0.14	0.0140903	-0.312	NA	NA
NUBP1_ 10752609_ 10752678_ 10756689_ 10756780_ 10747142_ 10747276_ 10757872_ 10758027	MXE	ENSG00000103274,10	NUBP1	chr16	0.762308	0.055	0.0374896	0.144	NA	NA
NUDT13_ 73125397_ 73125509_ 73126634_ 73126827_ 73125117_ 73125243_ 73130702_ 73131828	MXE	ENSG00000166321,13	NUDT13	chr10	NA	NA	0.00505658	-0.245	0.246115	-0.125
NUDT13_ 73125397_ 73125509_ 73126672_ 73126827_ 73125117_ 73125243_ 73130702_ 73131828	MXE	ENSG00000166321,13	NUDT13	chr10	NA	NA	0.00570636	-0.189	0.197603	-0.116
NUP54_ 76134174_ 76134362_ 76136185_ 76136412_ 76132522_ 76132719_ 76144148_ 76144292	MXE	ENSG00000138750,14	NUP54	chr4	0.522418	0.052	0.0217642	0.106	NA	NA
P2RX7_121166057_121166187_121167487_121167624_121165356_121165437_121175387_121175478	MXE	ENSG00000089041,16	P2RX7	chr12	0.17205	0.262	NA	NA	0.0193742	-0.386
PACRGL_ 20707802_ 20707870_ 20712787_ 20712922_ 20704659_ 20704814_ 20713431_ 20713539	MXE	ENSG00000163138,18	PACRGL	chr4	0.587694	-0.155	NA	NA	0.0474844	0.225
PACRGL_ 20709682_ 20709773_ 20712787_ 20712922_ 20704659_ 20704814_ 20713431_ 20713539	MXE	ENSG00000163138,18	PACRGL	chr4	0.892285	-0.017	NA	NA	0.0162991	0.102
PACRGL_ 20709682_ 20709773_ 20712787_ 20712922_ 20707802_ 20707870_ 20713431_ 20713539	MXE	ENSG00000163138,18	PACRGL	chr4	1	-0.077	NA	NA	0.0247713	0.248
PALLD_168894578_168894677_168898492_168898714_168890921_168891057_168903756_168903906	MXE	ENSG00000129116,18	PALLD	chr4	1	0.031	0.0124274	0.183	0.031271	0.152
PCBP1-AS1_ 70055713_ 70055910_ 70059642_ 70059680_ 70051202_ 70051305_ 70085546_ 70085624	MXE	ENSG00000179818,13	PCBP1-AS1	chr2	0.0362641	0.335	1	-0.007	1	-0.342
PCBP1-AS1_ 70055713_ 70055910_ 70059642_ 70059680_ 70053730_ 70053792_ 70085546_ 70085624	MXE	ENSG00000179818,13	PCBP1-AS1	chr2	1	0.156	0.044954	0.536	0.240577	0.38
PCBP1-AS1_ 70055713_ 70055910_ 70083506_ 70083687_ 70051202_ 70051305_ 70085546_ 70085624	MXE	ENSG00000179818,13	PCBP1-AS1	chr2	0.227266	0.217	0.983175	-0.017	0.0265597	-0.234
PCBP1-AS1_ 70055713_ 70055910_ 70083537_ 70083687_ 70051202_ 70051305_ 70085546_ 70085624	MXE	ENSG00000179818,13	PCBP1-AS1	chr2	0.186877	0.211	0.896797	-0.008	0.0419662	-0.219
PCDH15_ 53811548_ 53811619_ 53827392_ 53827548_ 53810555_ 53810664_ 53840319_ 53840496	MXE	ENSG00000150275,18	PCDH15	chr10	NA	NA	0.0202857	0.262	NA	NA
PCID2_113185484_113185560_113190871_113190975_113184345_113184487_113195070_113195125	MXE	ENSG00000126226,21	PCID2	chr13	0.257407	-0.099	0.0176605	-0.138	0.817732	-0.039
PCNX1_ 70988566_ 70988699_ 70995740_ 70995843_ 70976941_ 70978648_ 71009633_ 71009724	MXE	ENSG00000100731,15	PCNX1	chr14	1	-0.022	0.0236998	0.3	NA	NA
PGAP2_ 3811249_ 3811424_ 3823612_ 3823740_ 3808293_ 3808315_ 3823882_ 3824135	MXE	ENSG00000148985,19	PGAP2	chr11	0.0100914	0.195	1	0.06	0.278111	-0.135
PGD_ 10403070_ 10403136_ 10404160_ 10404279_ 10400392_ 10400572_ 10408070_ 10408140	MXE	ENSG00000142657,20	PGD	chr1	0.839648	-0.034	0.0494603	-0.117	NA	NA
PGS1_ 78400734_ 78400855_ 78403567_ 78404089_ 78399347_ 78399537_ 78414878_ 78415027	MXE	ENSG00000087157,18	PGS1	chr17	0.381784	-0.101	NA	NA	0.0188363	0.183
PHB2_ 6968410_ 6968708_ 6969497_ 6969577_ 6967891_ 6968021_ 6970195_ 6970280	MXE	ENSG00000215021,8	PHB2	chr12	0.251354	0.079	0.010328	0.126	NA	NA
PHC1_ 8921600_ 8921750_ 8922632_ 8922788_ 8920984_ 8921065_ 8930434_ 8930927	MXE	ENSG00000111752,10	PHC1	chr12	1	-0.002	0.0213152	-0.211	0.0375032	-0.209
PIGN_ 62162252_ 62162329_ 62163530_ 62163656_ 62161132_ 62161385_ 62186843_ 62187038	MXE	ENSG00000197563,10	PIGN	chr18	1	-0.028	0.0382437	-0.286	0.0690582	-0.257
PILRB_100353372_100353483_100353894_100354012_100353209_100353270_100355142_100355240	MXE	ENSG00000121716,20	PILRB	chr7	0.0595546	0.114	0.000541707	0.15	0.782426	0.035
PITPNA_ 1541565_ 1541640_ 1548295_ 1548387_ 1538868_ 1538952_ 1553003_ 1553149	MXE	ENSG00000174238,14	PITPNA	chr17	0.970152	0.029	0.016667	-0.129	0.00578672	-0.158
PMF1-BGLAP_156232319_156232425_156233627_156233728_156212981_156213176_156236287_156236483	MXE	ENSG00000260238,6	PMF1-BGLAP	chr1	1	0.017	0.00681803	0.117	0.0246297	0.1
PMS1_189805651_189805754_189818016_189818180_189795768_189795951_189843963_189844080	MXE	ENSG00000064933,17	PMS1	chr2	0.0330708	0.166	0.14457	0.132	NA	NA
PMS2CL_ 6741684_ 6741852_ 6746087_ 6746188_ 6735304_ 6735389_ 6747035_ 6747205	MXE	ENSG00000187953,10	PMS2CL	chr7	1	0.023	0.041546	0.204	NA	NA
POLR3GL_145974824_145974991_145977083_145977152_145964702_145964768_145977482_145977539	MXE	ENSG00000121851,12	POLR3GL	chr1	NA	NA	0.0202857	0.153	0.120046	0.122
POMK_ 43097523_ 43097615_ 43102504_ 43102600_ 43093517_ 43093563_ 43103527_ 43103830	MXE	ENSG00000185900,9	POMK	chr8	0.0418735	0.141	0.620401	0.06	0.300216	-0.081
PPP1R8_ 27838698_ 27838852_ 27843185_ 27843330_ 27832755_ 27832816_ 27847027_ 27847092	MXE	ENSG00000117751,17	PPP1R8	chr1	NA	NA	0.0328485	-0.135	NA	NA
PPP2R2B_146856498_146856583_147040716_147040805_146701044_146701142_147055664_147055931	MXE	ENSG00000156475,18	PPP2R2B	chr5	1	0.163	0.0489117	0.283	1	0.12
PPP2R2B_146878001_146878195_147035168_147035240_146701044_146701142_147040716_147040805	MXE	ENSG00000156475,18	PPP2R2B	chr5	1	0.279	0.00119092	0.279	NA	NA
PPP2R3C_ 35087950_ 35088010_ 35095047_ 35095184_ 35085466_ 35085778_ 35096557_ 35096633	MXE	ENSG00000092020,10	PPP2R3C	chr14	NA	NA	0.00865901	-0.167	0.231307	-0.125
PRDX5_ 64319733_ 64319868_ 64320660_ 64320792_ 64318087_ 64318386_ 64320864_ 64320903	MXE	ENSG00000126432,13	PRDX5	chr11	0.0174489	0.136	1.89686e-06	0.24	0.0506485	0.104
PRIMPOL_184665916_184666064_184672172_184672460_184661773_184661903_184678231_184678394	MXE	ENSG00000164306,10	PRIMPOL	chr4	0.00215091	-0.239	NA	NA	0.0754257	0.148
PRIMPOL_184678231_184678394_184685408_184685498_184672172_184672460_184685575_184685684	MXE	ENSG00000164306,10	PRIMPOL	chr4	0.0153316	0.238	0.0402153	0.183	0.806517	-0.055
PRIMPOL_184678231_184678394_184685411_184685498_184672172_184672460_184685575_184685684	MXE	ENSG00000164306,10	PRIMPOL	chr4	0.0194185	0.233	0.0402153	0.183	0.864505	-0.049
PRKRA_178436144_178436319_178441609_178441704_178431413_178432254_178443266_178443384	MXE	ENSG00000180228,12	PRKRA	chr2	1	0.025	0.0292277	0.145	0.129507	0.12
PRUNE1_151018466_151018669_151025514_151025673_151017811_151017904_151027232_151027327	MXE	ENSG00000143363,16	PRUNE1	chr1	0.0450654	0.165	0.728568	0.057	0.275433	-0.108
PUM2_ 20331716_ 20331937_ 20332966_ 20333063_ 20327309_ 20327378_ 20350596_ 20350702	MXE	ENSG00000055917,15	PUM2	chr2	0.0125079	-0.389	0.02541	-0.228	1	0.161
PUS7_105470687_105470848_105472131_105472193_105468336_105468463_105481051_105481177	MXE	ENSG00000091127,13	PUS7	chr7	0.31309	0.137	0.0254502	0.193	0.91883	0.056
RAB1A_ 65088938_ 65089070_ 65090982_ 65091078_ 65086854_ 65088690_ 65097970_ 65098066	MXE	ENSG00000138069,17	RAB1A	chr2	0.886735	0.025	0.000479213	0.118	0.0506485	0.093
RAB1A_ 65088938_ 65089070_ 65097970_ 65098066_ 65087870_ 65088690_ 65104733_ 65104806	MXE	ENSG00000138069,17	RAB1A	chr2	0.0925636	0.07	2.40504e-08	0.161	0.00754727	0.091
RAB1A_ 65090982_ 65091078_ 65097970_ 65098066_ 65088938_ 65089070_ 65104733_ 65104806	MXE	ENSG00000138069,17	RAB1A	chr2	0.909097	0.022	0.00481228	0.106	0.0707985	0.084
RAB1A_ 65097970_ 65098066_ 65104733_ 65104806_ 65087870_ 65088690_ 65129892_ 65130101	MXE	ENSG00000138069,17	RAB1A	chr2	1.02402e-05	-0.102	3.49689e-08	-0.113	NA	NA
RAD51_ 40709024_ 40709116_ 40718885_ 40718899_ 40701063_ 40701201_ 40728710_ 40728824	MXE	ENSG00000051180,16	RAD51	chr15	0.426188	-0.413	0.0407876	-0.464	0.903214	-0.051
RAD51AP1_ 4545218_ 4545312_ 4545781_ 4545832_ 4543762_ 4543911_ 4546308_ 4546418	MXE	ENSG00000111247,14	RAD51AP1	chr12	0.414082	-0.122	1	0.168	0.0237013	0.291
RAD51C_ 58709858_ 58709990_ 58720745_ 58720812_ 58703195_ 58703329_ 58724039_ 58724100	MXE	ENSG00000108384,14	RAD51C	chr17	0.910914	0.041	0.0494603	0.106	NA	NA
RAP1B_ 68624670_ 68624873_ 68641033_ 68641153_ 68610907_ 68611043_ 68648698_ 68648781	MXE	ENSG00000127314,17	RAP1B	chr12	0.172087	0.228	0.835456	-0.067	0.0141895	-0.295
RAP1B_ 68624674_ 68624873_ 68641037_ 68641153_ 68610907_ 68611052_ 68648698_ 68648781	MXE	ENSG00000127314,17	RAP1B	chr12	0.0782915	0.438	0.280767	-0.076	0.00399901	-0.514
RAPGEF4_172922280_172922300_172960759_172960813_172917801_172917874_172961121_172961228	MXE	ENSG00000091428,17	RAPGEF4	chr2	1	-0.028	0.0299089	0.108	0.53053	0.136
RAPH1_203477075_203477156_203489583_203490089_203461847_203461925_203491213_203491319	MXE	ENSG00000173166,17	RAPH1	chr2	0.0194367	0.116	0.684556	0.07	NA	NA
RBM23_ 22913723_ 22913845_ 22917027_ 22917166_ 22911327_ 22911403_ 22918998_ 22919149	MXE	ENSG00000100461,17	RBM23	chr14	1	0.029	0.00155034	0.197	0.219718	0.168
RBMX_136876502_136876655_136877914_136878086_136875470_136875585_136879016_136879123	MXE	ENSG00000147274,14	RBMX	chrX	NA	NA	0.0393745	0.102	0.26475	0.07
RBX1_ 40964046_ 40964117_ 40967798_ 40967884_ 40953554_ 40953633_ 40972475_ 40973309	MXE	ENSG00000100387,8	RBX1	chr22	0.684149	-0.041	0.00124272	-0.114	0.0560263	-0.073
RELA_ 65660123_ 65660215_ 65661686_ 65661835_ 65659665_ 65659797_ 65661936_ 65662088	MXE	ENSG00000173039,18	RELA	chr11	0.44315	0.118	0.0309293	0.171	0.806444	0.053
RINT1_105555027_105555227_105563732_105563947_105551569_105551707_105565276_105565457	MXE	ENSG00000135249,7	RINT1	chr7	0.483221	-0.117	NA	NA	0.0395108	0.152
RNASEH2B_ 50929474_ 50929582_ 50930682_ 50930759_ 50927406_ 50927478_ 50934884_ 50934999	MXE	ENSG00000136104,20	RNASEH2B	chr13	1	0.012	0.0217642	0.17	0.095709	0.158
RNASEH2B_ 50930682_ 50930759_ 50934884_ 50934999_ 50929474_ 50929582_ 50943320_ 50943394	MXE	ENSG00000136104,20	RNASEH2B	chr13	0.787278	0.046	0.0443989	0.142	0.28685	0.097
RNF165_ 46450703_ 46450799_ 46455973_ 46456080_ 46450295_ 46450400_ 46456518_ 46460820	MXE	ENSG00000141622,13	RNF165	chr18	0.636735	0.16	0.0432496	0.272	NA	NA
RNF19A_100274952_100275161_100287500_100288267_100269868_100270013_100309866_100310327	MXE	ENSG00000034677,12	RNF19A	chr8	1	0.024	0.0145542	0.103	0.0807824	0.079
RNF38_ 36369718_ 36369932_ 36375933_ 36376127_ 36357774_ 36357942_ 36400553_ 36400872	MXE	ENSG00000137075,17	RNF38	chr9	0.952677	0.065	0.0124274	0.173	NA	NA
ROBO3_124877160_124877184_124877266_124877309_124876120_124876460_124877518_124877658	MXE	ENSG00000154134,14	ROBO3	chr11	1	-0.013	1	-0.205	0.0336555	-0.192
RP9P_ 32918310_ 32918372_ 32921338_ 32921430_ 32916814_ 32917542_ 32930077_ 32930108	MXE	ENSG00000205763,13	RP9P	chr7	0.44315	-0.094	0.00688266	-0.154	0.801427	-0.06
RPL10A_ 35468798_ 35468873_ 35468946_ 35469285_ 35468419_ 35468439_ 35469380_ 35469529	MXE	ENSG00000198755,10	RPL10A	chr6	0.00302417	0.22	0.0601833	0.166	NA	NA
RPL18_ 48616725_ 48616824_ 48617315_ 48617423_ 48616078_ 48616202_ 48617790_ 48617877	MXE	ENSG00000063177,12	RPL18	chr19	0.211674	0.054	0.00119092	0.111	0.231172	0.056
RPL9_ 39454863_ 39454944_ 39456405_ 39456538_ 39454532_ 39454649_ 39457585_ 39457681	MXE	ENSG00000163682,16	RPL9	chr4	NA	NA	0.00767219	0.102	0.485822	0.047
RPRD2_150460059_150460317_150464526_150464727_150457287_150457570_150470560_150473556	MXE	ENSG00000163125,15	RPRD2	chr1	0.799983	-0.073	0.00191811	-0.274	0.0305607	-0.201
RPS3_ 75402351_ 75402379_ 75404019_ 75404207_ 75401639_ 75401733_ 75404671_ 75404868	MXE	ENSG00000149273,14	RPS3	chr11	0.33751	0.049	3.66122e-05	0.114	0.0156445	0.066
RSRC2_122513766_122513874_122514711_122514728_122511108_122511188_122515104_122515227	MXE	ENSG00000111011,17	RSRC2	chr12	0.0174489	0.266	0.00522756	0.306	1	0.039
RTN3_ 63704850_ 63704907_ 63718701_ 63721032_ 63681482_ 63681778_ 63749990_ 63750198	MXE	ENSG00000133318,13	RTN3	chr11	0.0227322	0.566	0.010086	0.566	NA	NA
RTN3_ 63752506_ 63752645_ 63753068_ 63753138_ 63749990_ 63750198_ 63753661_ 63753708	MXE	ENSG00000133318,13	RTN3	chr11	NA	NA	0.0499955	0.15	0.443149	0.075
RUFY3_ 70800140_ 70800205_ 70802955_ 70802983_ 70799404_ 70799875_ 70804347_ 70804416	MXE	ENSG00000018189,12	RUFY3	chr4	0.323701	0.213	0.0213152	0.269	NA	NA
SART3_108543027_108543152_108544426_108544478_108538933_108539089_108545138_108545323	MXE	ENSG00000075856,11	SART3	chr12	0.60191	-0.088	0.00531312	-0.212	NA	NA
SCAP_ 47428512_ 47428670_ 47435007_ 47435137_ 47427446_ 47427667_ 47442871_ 47443091	MXE	ENSG00000114650,19	SCAP	chr3	0.61451	0.063	0.00882763	0.159	NA	NA
SCN2A_165308665_165308794_165309351_165309443_165307847_165307937_165310322_165310595	MXE	ENSG00000136531,15	SCN2A	chr2	0.0209926	-0.533	0.000311624	-0.657	0.584802	-0.124
SEC11A_ 84680712_ 84680832_ 84687624_ 84687774_ 84670724_ 84670782_ 84691534_ 84691644	MXE	ENSG00000140612,13	SEC11A	chr15	0.130005	0.067	0.00624808	0.103	0.627936	0.036
SEC31A_ 82861630_ 82861708_ 82862533_ 82862572_ 82857688_ 82857764_ 82863317_ 82863392	MXE	ENSG00000138674,16	SEC31A	chr4	0.0172841	-0.147	0.548948	-0.056	0.204842	0.091
SEMA4F_ 74657852_ 74657951_ 74662731_ 74662825_ 74657564_ 74657624_ 74673456_ 74673576	MXE	ENSG00000135622,12	SEMA4F	chr2	0.16452	0.194	0.0415919	0.236	1	0.042
SENP6_ 75621531_ 75621625_ 75622750_ 75622858_ 75602223_ 75602576_ 75623899_ 75623960	MXE	ENSG00000112701,17	SENP6	chr6	0.41303	-0.047	NA	NA	0.00615909	0.164
SF3B2_ 66055534_ 66055585_ 66056837_ 66056955_ 66055075_ 66055315_ 66057265_ 66057375	MXE	ENSG00000087365,15	SF3B2	chr11	0.00171651	0.119	0.0299089	0.117	NA	NA
SFXN5_ 72968447_ 72968533_ 72988257_ 72988348_ 72961130_ 72961248_ 73020238_ 73020264	MXE	ENSG00000144040,12	SFXN5	chr2	0.0485416	-0.123	NA	NA	0.000902281	0.156
SGCE_ 94621848_ 94621995_ 94622515_ 94622626_ 94618757_ 94618956_ 94623324_ 94623397	MXE	ENSG00000127990,17	SGCE	chr7	1	-0.333	0.00179517	0.333	1	0.667
SGCE_ 94621848_ 94621995_ 94622545_ 94622626_ 94618757_ 94618956_ 94623324_ 94623397	MXE	ENSG00000127990,17	SGCE	chr7	1	-0.333	0.0432496	0.2	1	0.534
SGCE_ 94639340_ 94639448_ 94644605_ 94644667_ 94629718_ 94629841_ 94655989_ 94656186	MXE	ENSG00000127990,17	SGCE	chr7	0.750006	-0.183	0.00505658	-0.486	0.109424	-0.304
SKA3_ 21159901_ 21159987_ 21161789_ 21161875_ 21157921_ 21158125_ 21167987_ 21168399	MXE	ENSG00000165480,15	SKA3	chr13	NA	NA	0.00627768	-0.219	NA	NA
SLC25A32_103403163_103403324_103404775_103404861_103401940_103402054_103407633_103407784	MXE	ENSG00000164933,11	SLC25A32	chr8	0.847724	0.086	0.00627768	0.228	0.167238	0.142
SLC30A5_ 69118498_ 69118628_ 69121693_ 69121895_ 69117238_ 69117396_ 69123198_ 69123425	MXE	ENSG00000145740,18	SLC30A5	chr5	0.428234	-0.077	0.0316648	-0.105	0.927454	-0.028
SLC35A5_112569170_112569269_112573888_112573956_112563384_112563533_112580545_112580559	MXE	ENSG00000138459,8	SLC35A5	chr3	NA	NA	NA	NA	0.00866631	0.178
SLC38A9_ 55649206_ 55649314_ 55652528_ 55652723_ 55645788_ 55645895_ 55656714_ 55656774	MXE	ENSG00000177058,11	SLC38A9	chr5	0.0262819	-0.511	0.758187	-0.207	0.455135	0.304
SLC3A2_ 62882504_ 62882618_ 62882666_ 62882807_ 62881698_ 62882066_ 62882907_ 62882999	MXE	ENSG00000168003,16	SLC3A2	chr11	1	0.176	0.0139678	0.333	0.093238	0.158
SLC41A3_126033606_126033678_126050942_126051050_126026328_126026479_126067946_126068246	MXE	ENSG00000114544,16	SLC41A3	chr3	0.172413	0.174	0.0379815	0.185	NA	NA
SMARCA2_ 2159813_ 2159909_ 2161000_ 2161035_ 2158452_ 2158594_ 2161685_ 2161903	MXE	ENSG00000080503,23	SMARCA2	chr9	0.100891	0.156	NA	NA	0.0156445	-0.196
SMCHD1_ 2762104_ 2762236_ 2763636_ 2763789_ 2760400_ 2760739_ 2769693_ 2769807	MXE	ENSG00000101596,15	SMCHD1	chr18	NA	NA	0.042009	0.145	0.934188	0.049
SNHG7_136725054_136725110_136726310_136726416_136724657_136724939_136727045_136727086	MXE	ENSG00000233016,6	SNHG7	chr9	NA	NA	0.00501048	0.138	0.143059	0.09
SNRPF_ 95861167_ 95861293_ 95865323_ 95865388_ 95858927_ 95859076_ 95866004_ 95867053	MXE	ENSG00000139343,10	SNRPF	chr12	0.437197	0.059	0.00119092	0.12	0.219501	0.061
SNRPN_ 24967931_ 24968082_ 24976304_ 24976416_ 24962113_ 24962209_ 24976876_ 24977029	MXE	ENSG00000128739,22	SNRPN	chr15	0.930084	0.032	0.00609209	0.111	0.167238	0.08
SNX1_ 64123502_ 64123546_ 64126078_ 64126220_ 64118787_ 64118854_ 64127173_ 64127252	MXE	ENSG00000028528,14	SNX1	chr15	0.658965	-0.065	0.283668	0.057	0.0246297	0.122
SNX10_ 26354056_ 26354184_ 26357006_ 26357127_ 26346419_ 26346466_ 26360974_ 26361061	MXE	ENSG00000086300,15	SNX10	chr7	0.46772	0.093	0.00192293	0.163	0.822786	0.07
SORBS2_185690561_185690611_185734098_185734154_185684753_185684846_185775226_185775366	MXE	ENSG00000154556,18	SORBS2	chr4	NA	NA	0.0243583	-0.138	0.0405455	-0.138
SPAST_ 32098795_ 32098891_ 32114637_ 32114825_ 32089521_ 32089605_ 32115701_ 32115835	MXE	ENSG00000021574,12	SPAST	chr2	0.607969	-0.09	0.016667	-0.217	0.429947	-0.127
SPATA6_ 48411463_ 48411588_ 48451551_ 48451600_ 48403801_ 48403882_ 48452993_ 48453131	MXE	ENSG00000132122,11	SPATA6	chr1	1	0.02	0.0419573	0.112	0.33426	0.092
SPATS2L_200372108_200372251_200383866_200384017_200329430_200329480_200389222_200389283	MXE	ENSG00000196141,13	SPATS2L	chr2	0.749974	-0.197	0.00290116	-0.403	0.682286	-0.206
SPG21_ 64969254_ 64969362_ 64970113_ 64970222_ 64965319_ 64965460_ 64974601_ 64974747	MXE	ENSG00000090487,10	SPG21	chr15	0.677908	0.079	0.0283814	0.129	NA	NA
SPIN1_ 88415606_ 88415699_ 88418777_ 88418951_ 88388430_ 88388538_ 88426381_ 88426591	MXE	ENSG00000106723,16	SPIN1	chr9	0.714764	-0.183	0.0865154	0.056	0.00810397	0.239
SRBD1_ 45547521_ 45547612_ 45551124_ 45551282_ 45546731_ 45546839_ 45553622_ 45553730	MXE	ENSG00000068784,12	SRBD1	chr2	0.0702662	0.188	0.00552619	0.228	NA	NA
SSBP4_ 18431646_ 18431706_ 18431792_ 18431862_ 18430840_ 18430930_ 18431999_ 18432070	MXE	ENSG00000130511,15	SSBP4	chr19	0.912096	-0.048	0.0622593	0.113	0.0141812	0.161
SSX2IP_ 84650361_ 84650527_ 84651882_ 84651997_ 84643706_ 84647607_ 84655831_ 84656005	MXE	ENSG00000117155,16	SSX2IP	chr1	0.845091	-0.074	0.016667	-0.181	0.408171	-0.107
ST3GAL5_ 85846376_ 85846563_ 85847860_ 85848204_ 85839195_ 85840392_ 85861180_ 85861292	MXE	ENSG00000115525,17	ST3GAL5	chr2	0.414082	-0.11	0.374495	0.134	0.0193742	0.245
STYXL1_ 76028641_ 76028703_ 76030420_ 76030527_ 76021850_ 76021992_ 76047811_ 76047953	MXE	ENSG00000127952,16	STYXL1	chr7	NA	NA	0.0374896	0.134	0.246115	0.113
SUSD1_112052398_112052438_112058427_112058686_112041866_112041960_112062936_112063033	MXE	ENSG00000106868,16	SUSD1	chr9	NA	NA	0.0309293	0.149	0.0162991	0.144
SUZ12P1_ 30743300_ 30743369_ 30759490_ 30759539_ 30735032_ 30735097_ 30766502_ 30766588	MXE	ENSG00000264538,6	SUZ12P1	chr17	0.379905	-0.136	0.164843	0.147	0.00810397	0.283
TAB3_ 30842965_ 30843049_ 30846550_ 30846644_ 30834050_ 30834152_ 30852777_ 30852938	MXE	ENSG00000157625,15	TAB3	chrX	1	-0.002	0.0159829	-0.271	0.0149475	-0.269
TADA2A_ 37426949_ 37427009_ 37437737_ 37437922_ 37411268_ 37411390_ 37440504_ 37440662	MXE	ENSG00000276234,4	TADA2A	chr17	NA	NA	1	-1	0.00901857	-0.769
TAF1_ 71384944_ 71385049_ 71387260_ 71387461_ 71383961_ 71384135_ 71388236_ 71388378	MXE	ENSG00000147133,15	TAF1	chrX	NA	NA	0.215378	-0.158	0.00251426	-0.237
TARBP1_234392415_234392552_234393361_234393486_234391312_234391745_234393645_234393837	MXE	ENSG00000059588,9	TARBP1	chr1	0.159742	0.184	3.6983e-05	0.241	0.952667	0.056
TASP1_ 13580896_ 13580981_ 13587249_ 13587370_ 13559007_ 13559114_ 13623445_ 13623514	MXE	ENSG00000089123,15	TASP1	chr20	0.587694	-0.145	0.040375	-0.27	0.926854	-0.126
TASP1_ 13587249_ 13587370_ 13623445_ 13623514_ 13580896_ 13580981_ 13625184_ 13625252	MXE	ENSG00000089123,15	TASP1	chr20	0.00443113	0.507	0.29145	0.282	0.189016	-0.225
TBC1D7_ 13320907_ 13321095_ 13325093_ 13325174_ 13307599_ 13307745_ 13326786_ 13326906	MXE	ENSG00000145979,17	TBC1D7	chr6	NA	NA	0.0183093	-0.204	0.476958	-0.112
TECR_ 14564948_ 14564992_ 14565065_ 14565123_ 14564785_ 14564858_ 14565201_ 14565290	MXE	ENSG00000099797,14	TECR	chr19	0.122619	0.11	4.95898e-05	0.173	0.44894	0.063
TFDP1_113636533_113636700_113637817_113637896_113635976_113636128_113640119_113641470	MXE	ENSG00000198176,12	TFDP1	chr13	NA	NA	0.00165917	0.138	0.557012	0.051
TM9SF4_ 32155102_ 32155186_ 32157793_ 32157969_ 32150799_ 32150875_ 32158450_ 32158514	MXE	ENSG00000101337,15	TM9SF4	chr20	1	0.03	NA	NA	0.0102846	-0.151
TMEM147_ 35545887_ 35545957_ 35546525_ 35546585_ 35545594_ 35545816_ 35546671_ 35546808	MXE	ENSG00000105677,11	TMEM147	chr19	1	-0.005	0.0108165	0.114	NA	NA
TPM1_ 63061197_ 63061273_ 63061712_ 63061788_ 63060868_ 63060939_ 63062214_ 63062277	MXE	ENSG00000140416,20	TPM1	chr15	0.00206821	-0.164	0.042439	-0.106	0.571546	0.058
TSC22D2_150423048_150423120_150438197_150438354_150411178_150411308_150457075_150457127	MXE	ENSG00000196428,12	TSC22D2	chr3	0.00443113	-0.496	0.00174833	-0.533	1	-0.037
TSEN2_ 12505153_ 12505231_ 12519058_ 12519197_ 12503261_ 12503784_ 12528887_ 12528924	MXE	ENSG00000154743,17	TSEN2	chr3	1	-0.038	0.0458586	0.249	0.133534	0.287
TSGA10_ 99020279_ 99020482_ 99035229_ 99035439_ 99018535_ 99018640_ 99064938_ 99065124	MXE	ENSG00000135951,14	TSGA10	chr2	1	0.309	0.00505658	0.554	1	0.245
TSN_121761408_121761524_121763004_121763084_121758709_121758806_121765133_121767853	MXE	ENSG00000211460,11	TSN	chr2	0.769442	0.032	0.0176605	0.116	0.18313	0.085
TSNAX-DISC1_231537212_231537327_231542480_231542611_231529254_231529359_231561127_231561255	MXE	ENSG00000270106,6	TSNAX-DISC1	chr1	0.324728	-0.093	0.022184	-0.14	0.744102	-0.047
TTC25_ 41935470_ 41935543_ 41935598_ 41935749_ 41935216_ 41935348_ 41936472_ 41936534	MXE	ENSG00000204815,9	TTC25	chr17	0.267585	0.269	0.0360852	0.319	1	0.051
TTL_112502911_112503181_112520281_112520425_112501205_112501341_112528680_112541739	MXE	ENSG00000114999,7	TTL	chr2	0.0721026	0.102	0.000625822	0.174	0.373881	0.072
TTLL9_ 31919863_ 31919932_ 31922962_ 31923053_ 31909736_ 31909922_ 31925008_ 31925049	MXE	ENSG00000131044,17	TTLL9	chr20	0.00220806	0.425	0.231208	-0.302	2.85709e-08	-0.727
TYW1_ 67049948_ 67050066_ 67067284_ 67067403_ 67024899_ 67025022_ 67083429_ 67083539	MXE	ENSG00000198874,12	TYW1	chr7	0.936975	0.041	0.0139958	0.159	NA	NA
UBE2F-SCLY_237973091_237973225_237987962_237987992_237967013_237967132_237994743_237994809	MXE	ENSG00000258984,5	UBE2F-SCLY	chr2	0.981167	-0.048	0.0150063	-0.191	0.204651	-0.143
UBE2F_238016565_238016633_238025341_238025412_237973091_237973225_238035877_238035940	MXE	ENSG00000184182,18	UBE2F	chr2	0.778172	0.085	0.00159753	-0.365	0.00096786	-0.45
UBE2F_238016565_238016633_238025341_238025412_237987962_237987992_238035877_238035940	MXE	ENSG00000184182,18	UBE2F	chr2	0.0120471	0.38	0.0676642	-0.231	0.000257008	-0.611
UBE2J2_ 1264782_ 1264830_ 1266097_ 1266290_ 1263345_ 1263386_ 1267861_ 1267992	MXE	ENSG00000160087,20	UBE2J2	chr1	0.0311842	0.354	0.693137	0.042	0.413478	-0.312
UBE3A_ 25407066_ 25407137_ 25408619_ 25408684_ 25405460_ 25405502_ 25409087_ 25409207	MXE	ENSG00000114062,19	UBE3A	chr15	1	-0.151	1	0.06	0.0156445	0.211
UBE3A_ 25407066_ 25407262_ 25408619_ 25408684_ 25405460_ 25405502_ 25409087_ 25409207	MXE	ENSG00000114062,19	UBE3A	chr15	0.172087	-0.213	1	0.005	0.0156445	0.217
UBXN2B_ 58433159_ 58433243_ 58434394_ 58434504_ 58416849_ 58416953_ 58439632_ 58439770	MXE	ENSG00000215114,8	UBXN2B	chr8	1	0.029	0.0139958	-0.147	NA	NA
UPF3A_114286518_114286629_114291488_114291544_114281952_114282127_114291633_114291792	MXE	ENSG00000169062,14	UPF3A	chr13	NA	NA	0.221242	0.058	0.00411136	0.17
UROS_125798064_125798145_125807412_125807487_125796102_125796188_125812213_125812288	MXE	ENSG00000188690,13	UROS	chr10	0.0398362	-0.124	0.487431	-0.078	0.931256	0.046
USP28_113815173_113815382_113817657_113817837_113813754_113813955_113823604_113823700	MXE	ENSG00000048028,11	USP28	chr11	NA	NA	0.00720584	-0.245	0.643615	-0.088
USP37_218553552_218553724_218558497_218558717_218549808_218549909_218560819_218560883	MXE	ENSG00000135913,10	USP37	chr2	0.160895	-0.081	NA	NA	0.000981522	0.139
USP39_ 85623645_ 85623782_ 85625538_ 85625691_ 85621484_ 85621579_ 85630720_ 85630946	MXE	ENSG00000168883,19	USP39	chr2	0.959537	0.029	0.0477044	0.146	NA	NA
USP39_ 85625538_ 85625691_ 85630720_ 85630946_ 85623625_ 85623782_ 85636052_ 85636130	MXE	ENSG00000168883,19	USP39	chr2	1	0.016	0.0420923	0.172	NA	NA
USP54_ 73519796_ 73519992_ 73520907_ 73521027_ 73516374_ 73517747_ 73523582_ 73523750	MXE	ENSG00000166348,18	USP54	chr10	0.241198	0.167	0.00192293	0.31	0.354774	0.143
UXS1_106096717_106096821_106098715_106098773_106093302_106094157_106101057_106101118	MXE	ENSG00000115652,14	UXS1	chr2	NA	NA	0.00777464	0.146	0.410417	0.075
VCAN_ 83519348_ 83522309_ 83537006_ 83542268_ 83512102_ 83512396_ 83545536_ 83545650	MXE	ENSG00000038427,15	VCAN	chr5	0.0120471	0.153	0.107759	0.081	0.451689	-0.073
VPS13B_ 99507136_ 99507203_ 99507769_ 99507911_ 99502835_ 99502950_ 99511103_ 99511512	MXE	ENSG00000132549,18	VPS13B	chr8	0.29088	-0.031	0.000263929	-0.352	0.896219	-0.321
VPS50_ 93323610_ 93323732_ 93341426_ 93341575_ 93311165_ 93311272_ 93348710_ 93348807	MXE	ENSG00000004766,16	VPS50	chr7	NA	NA	0.00672701	0.19	NA	NA
WDR19_ 39186538_ 39186604_ 39189655_ 39189781_ 39185725_ 39185817_ 39199477_ 39199593	MXE	ENSG00000157796,17	WDR19	chr4	1	0.142	NA	NA	0.0156445	-0.246
WDR45B_ 82621608_ 82621799_ 82625388_ 82625483_ 82619042_ 82619128_ 82627203_ 82627291	MXE	ENSG00000141580,15	WDR45B	chr17	0.604833	-0.051	0.0252968	-0.102	NA	NA
WDR45B_ 82625388_ 82625483_ 82627203_ 82627291_ 82621608_ 82621799_ 82630920_ 82631022	MXE	ENSG00000141580,15	WDR45B	chr17	0.386754	-0.064	0.00624808	-0.122	NA	NA
WIPF2_ 40256390_ 40256522_ 40260534_ 40260667_ 40219321_ 40219492_ 40262524_ 40262641	MXE	ENSG00000171475,13	WIPF2	chr17	0.495893	0.117	0.0492572	0.229	0.466345	0.112
WRB-SH3BGR_ 39508997_ 39509027_ 39511679_ 39511809_ 39499822_ 39499915_ 39515087_ 39515321	MXE	ENSG00000285815,1	WRB-SH3BGR	chr21	0.162875	-0.189	0.0186892	-0.238	1	-0.048
ZFAS1_ 49279103_ 49279208_ 49280902_ 49280964_ 49278177_ 49278716_ 49289044_ 49289260	MXE	ENSG00000177410,12	ZFAS1	chr20	0.538547	0.046	0.0480888	0.123	NA	NA
ZFYVE28_ 2320169_ 2320271_ 2335704_ 2335794_ 2304288_ 2305536_ 2337406_ 2337496	MXE	ENSG00000159733,13	ZFYVE28	chr4	0.0123559	-0.343	NA	NA	0.373346	0.149
ZGRF1_112587279_112587929_112603523_112603697_112586444_112586583_112606007_112606091	MXE	ENSG00000138658,15	ZGRF1	chr4	1	0.028	NA	NA	0.0100217	0.25
ZMYM4_ 35387453_ 35387604_ 35388909_ 35389082_ 35387002_ 35387278_ 35389947_ 35390098	MXE	ENSG00000146463,11	ZMYM4	chr1	NA	NA	0.0458586	0.115	NA	NA
ZNF195_ 3361975_ 3362032_ 3362545_ 3362602_ 3361742_ 3361889_ 3370974_ 3371070	MXE	ENSG00000005801,17	ZNF195	chr11	1	-0.556	0.00695453	-0.556	NA	NA
ZNF250_144880364_144880458_144886839_144886902_144876535_144876661_144889580_144889694	MXE	ENSG00000196150,13	ZNF250	chr8	0.106472	-0.071	NA	NA	0.0157363	0.124
ZNF331_ 53539215_ 53539282_ 53555844_ 53555908_ 53522616_ 53522684_ 53563762_ 53563792	MXE	ENSG00000130844,17	ZNF331	chr19	0.832321	0.024	0.00505658	0.354	NA	NA
ZNF345_ 36862916_ 36863011_ 36876784_ 36876876_ 36851829_ 36851904_ 36892817_ 36893034	MXE	ENSG00000251247,10	ZNF345	chr19	0.00628997	0.482	0.00209095	0.556	NA	NA
ZNF346_177041777_177041870_177044391_177044533_177041125_177041229_177062057_177062151	MXE	ENSG00000113761,11	ZNF346	chr5	1	0.006	0.0316158	0.104	0.183528	0.099
ZNF420_ 37089038_ 37089127_ 37090994_ 37091121_ 37080344_ 37080388_ 37096030_ 37096115	MXE	ENSG00000197050,10	ZNF420	chr19	0.0456947	0.281	NA	NA	0.647728	-0.218
ZNF43_ 21843144_ 21843326_ 21845391_ 21845506_ 21819094_ 21819221_ 21850937_ 21851027	MXE	ENSG00000198521,11	ZNF43	chr19	0.0269433	0.323	1	0.034	0.214126	-0.289
ZNF43_ 21843144_ 21843326_ 21850937_ 21851027_ 21819094_ 21819221_ 21851904_ 21852017	MXE	ENSG00000198521,11	ZNF43	chr19	0.0205967	0.328	1	0.024	0.102172	-0.303
ZNF559-ZNF177_ 9341101_ 9341184_ 9364861_ 9364948_ 9338493_ 9338582_ 9376315_ 9376423	MXE	ENSG00000270011,7	ZNF559-ZNF177	chr19	NA	NA	0.0302376	0.227	1	0
ZNF621_ 40529318_ 40529445_ 40529494_ 40529575_ 40525778_ 40525864_ 40530208_ 40530316	MXE	ENSG00000172888,11	ZNF621	chr3	0.489543	-0.074	0.0367991	-0.121	0.953371	-0.047
ZNF772_ 57475659_ 57475786_ 57476633_ 57476672_ 57475023_ 57475146_ 57477276_ 57477570	MXE	ENSG00000197128,11	ZNF772	chr19	0.0243191	0.407	NA	NA	0.0561117	-0.361
ZSWIM7_ 15987265_ 15987368_ 15993756_ 15993778_ 15977890_ 15978163_ 15999502_ 15999681	MXE	ENSG00000214941,7	ZSWIM7	chr17	1	0.806	1	-0.194	2.22355e-09	-1
AC026412,1_ 1632643_ 1632906_ 1632643_ 1632751_ 1632844_ 1632906	RI	ENSG00000188002,10	AC026412,1	chr5	0.0251377	-0.468	1	-0.303	0.136872	0.165
ADAMTS10_ 8596072_ 8596412_ 8596072_ 8596219_ 8596306_ 8596412	RI	ENSG00000142303,13	ADAMTS10	chr19	1	0.055	0.00211233	0.182	1	0.127
AL365205,1_ 41783461_ 41784238_ 41783461_ 41783605_ 41784130_ 41784238	RI	ENSG00000124593,16	AL365205,1	chr6	1	0.891	0.00141601	0.806	1	-0.086
AP4M1_100101879_100102393_100101879_100101968_100102245_100102393	RI	ENSG00000221838,9	AP4M1	chr7	1	0.161	0.00494356	0.342	1	0.181
ATG4D_ 10546838_ 10547253_ 10546838_ 10547082_ 10547188_ 10547253	RI	ENSG00000130734,9	ATG4D	chr19	0.0290989	0.389	0.000113409	0.667	1	0.277
ATP6AP2_ 40599591_ 40600881_ 40599591_ 40599741_ 40600781_ 40600881	RI	ENSG00000182220,14	ATP6AP2	chrX	0.0687998	-0.176	0.00542907	-0.226	1	-0.05
CCDC159_ 11353450_ 11353874_ 11353450_ 11353572_ 11353791_ 11353874	RI	ENSG00000183401,11	CCDC159	chr19	0.00243477	0.12	0.0579865	0.09	1	-0.03
CCNL2_ 1390765_ 1392803_ 1390765_ 1390865_ 1392678_ 1392803	RI	ENSG00000221978,11	CCNL2	chr1	0.0436164	-0.321	0.933633	-0.21	1	0.11
CDK16_ 47226993_ 47227223_ 47226993_ 47227099_ 47227159_ 47227223	RI	ENSG00000102225,15	CDK16	chrX	1	0.32	0.0440812	0.524	1	0.204
COL20A1_ 63328078_ 63328498_ 63328078_ 63328127_ 63328330_ 63328498	RI	ENSG00000101203,16	COL20A1	chr20	1	-0.145	0.0248373	-0.287	1	-0.142
CPT1C_ 49705006_ 49705298_ 49705006_ 49705114_ 49705213_ 49705298	RI	ENSG00000169169,14	CPT1C	chr19	0.0290989	0.14	0.19378	0.106	1	-0.034
CTSF_ 66565670_ 66565927_ 66565670_ 66565749_ 66565830_ 66565927	RI	ENSG00000174080,10	CTSF	chr11	1	0.179	0.0413915	0.445	1	0.266
DPY19L3_ 32467473_ 32468813_ 32467473_ 32467626_ 32468730_ 32468813	RI	ENSG00000178904,18	DPY19L3	chr19	NA	NA	0.000282849	0.617	1	0.617
DSN1_ 36770872_ 36771473_ 36770872_ 36770977_ 36771424_ 36771473	RI	ENSG00000149636,15	DSN1	chr20	1	0.107	7.98823e-06	0.618	0.00212324	0.51
EIF2B5_184143051_184144224_184143051_184143142_184144098_184144224	RI	ENSG00000145191,13	EIF2B5	chr3	0.0629613	-0.548	0.0457403	-0.548	NA	NA
ELOB_ 2771413_ 2772102_ 2771413_ 2771604_ 2771993_ 2772102	RI	ENSG00000103363,14	ELOB	chr16	1	-0.038	0.00044713	-0.254	0.0972778	-0.216
EML3_ 62602758_ 62603247_ 62602758_ 62602779_ 62603148_ 62603247	RI	ENSG00000149499,11	EML3	chr11	1	0.061	0.0117178	0.215	0.970247	0.154
EPB41L2_130869851_130870126_130869851_130869944_130870038_130870126	RI	ENSG00000079819,18	EPB41L2	chr6	5.34566e-06	-0.478	0.934806	-0.189	0.000118318	0.289
EXOSC10_ 11076841_ 11077651_ 11076841_ 11076948_ 11077600_ 11077651	RI	ENSG00000171824,13	EXOSC10	chr1	0.00201013	-0.543	0.00101891	-0.543	NA	NA
GORASP1_ 39100304_ 39100877_ 39100304_ 39100503_ 39100787_ 39100877	RI	ENSG00000114745,13	GORASP1	chr3	0.0687998	-0.203	0.0224853	-0.302	1	-0.099
HAX1_154273335_154273961_154273335_154273534_154273773_154273961	RI	ENSG00000143575,14	HAX1	chr1	0.0575798	-0.345	0.0279043	-0.436	1	-0.091
HDLBP_241268953_241269295_241268953_241269105_241269205_241269295	RI	ENSG00000115677,16	HDLBP	chr2	0.000213356	-0.61	1	-0.61	NA	NA
HMG20B_ 3573691_ 3574586_ 3573691_ 3573800_ 3574340_ 3574586	RI	ENSG00000064961,18	HMG20B	chr19	1	0.333	0.667684	0.565	0.034266	0.231
HNRNPC_ 21263310_ 21263829_ 21263310_ 21263336_ 21263666_ 21263829	RI	ENSG00000092199,17	HNRNPC	chr14	1	-0.009	0.0229379	-0.535	0.0177537	-0.526
HSDL1_ 84129985_ 84130431_ 84129985_ 84130171_ 84130336_ 84130431	RI	ENSG00000103160,11	HSDL1	chr16	0.0436164	-0.249	0.000211684	-0.33	1	-0.08
HSF4_ 67169278_ 67169945_ 67169278_ 67169348_ 67169630_ 67169945	RI	ENSG00000102878,16	HSF4	chr16	0.504103	0.082	0.000402311	0.137	1	0.055
IFT80_160383436_160384646_160383436_160383504_160384405_160384646	RI	ENSG00000068885,14	IFT80	chr3	0.0436164	0.148	0.00741769	0.201	1	0.053
ILF3_ 10683916_ 10685765_ 10683916_ 10683970_ 10684858_ 10685765	RI	ENSG00000129351,17	ILF3	chr19	1	0.193	0.0111503	-0.614	5.72129e-11	-0.808
IMP4_130342893_130343194_130342893_130342962_130343085_130343194	RI	ENSG00000136718,9	IMP4	chr2	0.117572	0.102	0.0224853	0.117	1	0.016
KDM2B_121429508_121430469_121429508_121430163_121430276_121430469	RI	ENSG00000089094,18	KDM2B	chr12	NA	NA	4.97548e-05	0.72	NA	NA
KLRK1_ 10378553_ 10379792_ 10378553_ 10378705_ 10379699_ 10379792	RI	ENSG00000213809,8	KLRK1	chr12	0.048999	0.177	0.130399	0.153	1	-0.025
KLRK1_ 10379446_ 10379792_ 10379446_ 10379482_ 10379699_ 10379792	RI	ENSG00000213809,8	KLRK1	chr12	0.00110923	0.101	0.0520042	0.073	1	-0.028
LINC01089_121795266_121796242_121795266_121795726_121796190_121796242	RI	ENSG00000212694,8	LINC01089	chr12	5.93764e-09	-0.755	1	-0.133	1.00662e-07	0.622
LMO2_ 33869345_ 33869987_ 33869345_ 33869586_ 33869709_ 33869987	RI	ENSG00000135363,11	LMO2	chr11	0.0389416	-0.358	0.097301	-0.29	1	0.068
MLST8_ 2206357_ 2206659_ 2206357_ 2206409_ 2206554_ 2206659	RI	ENSG00000167965,17	MLST8	chr16	0.161129	-0.154	0.0440914	-0.177	1	-0.023
MUTYH_ 45332762_ 45333324_ 45332762_ 45332834_ 45333284_ 45333324	RI	ENSG00000132781,17	MUTYH	chr1	1	0.065	0.080565	-0.253	0.0138434	-0.318
NSUN5P1_ 75415591_ 75416191_ 75415591_ 75415770_ 75416102_ 75416191	RI	ENSG00000223705,9	NSUN5P1	chr7	1	-0.083	0.00894825	-0.257	1	-0.174
NT5C_ 75130964_ 75131281_ 75130964_ 75131081_ 75131180_ 75131281	RI	ENSG00000125458,6	NT5C	chr17	1	0.044	0.00807335	0.184	0.0188175	0.14
PAX6_ 31800690_ 31801776_ 31800690_ 31800856_ 31801761_ 31801776	RI	ENSG00000007372,22	PAX6	chr11	0.160671	-0.219	0.00342564	-0.386	1	-0.168
PKD1_ 2097727_ 2097984_ 2097727_ 2097777_ 2097867_ 2097984	RI	ENSG00000008710,19	PKD1	chr16	1	-0.015	0.030443	-0.11	0.169736	-0.095
POLM_ 44074130_ 44074530_ 44074130_ 44074220_ 44074397_ 44074530	RI	ENSG00000122678,16	POLM	chr7	0.0606472	0.095	1	-0.195	0.022486	-0.29
PPIL2_ 21694936_ 21695496_ 21694936_ 21695070_ 21695397_ 21695496	RI	ENSG00000100023,18	PPIL2	chr22	1	-0.077	0.00741769	-0.627	1	-0.551
PPP2R3B_ 14253_ 14877_ 14253_ 14343_ 14828_ 14877	RI	ENSG00000273850,3	PPP2R3B	chrKI270913,1	0.0389416	-0.493	1	0.07	0.0305803	0.563
PRPF4B_ 4060412_ 4061147_ 4060412_ 4060644_ 4061014_ 4061147	RI	ENSG00000112739,16	PRPF4B	chr6	0.0436164	0.222	0.480058	-0.094	1	-0.316
PRPF4B_ 4060412_ 4062299_ 4060412_ 4060686_ 4061654_ 4062299	RI	ENSG00000112739,16	PRPF4B	chr6	1	0.227	0.00558119	0.36	1	0.134
RHOT2_ 668352_ 668699_ 668352_ 668411_ 668655_ 668699	RI	ENSG00000140983,13	RHOT2	chr16	1	-0.353	1	0.388	7.73427e-07	0.741
RNASEK-C17orf49_ 7014144_ 7015156_ 7014144_ 7014277_ 7015061_ 7015156	RI	ENSG00000161939,19	RNASEK-C17orf49	chr17	0.236205	-0.158	0.000113409	-0.559	1	-0.401
RNF123_ 49704649_ 49705186_ 49704649_ 49704756_ 49705081_ 49705186	RI	ENSG00000164068,15	RNF123	chr3	1	-0.239	0.386436	0.099	0.0183877	0.338
RNF214_117238600_117239860_117238600_117238646_117239800_117239860	RI	ENSG00000167257,10	RNF214	chr11	1	0.054	0.000245107	-0.449	1.76147e-05	-0.502
SETMAR_ 4312897_ 4313761_ 4312897_ 4313229_ 4313666_ 4313761	RI	ENSG00000170364,12	SETMAR	chr3	0.842902	0.212	0.917987	-0.259	0.0288916	-0.471
SGK494_ 28611392_ 28611656_ 28611392_ 28611481_ 28611566_ 28611656	RI	ENSG00000167524,14	SGK494	chr17	0.0150788	0.502	0.00141601	0.555	1	0.053
SLC25A37_ 23566107_ 23568378_ 23566107_ 23566813_ 23568321_ 23568378	RI	ENSG00000147454,13	SLC25A37	chr8	0.0389416	0.19	0.434194	0.15	1	-0.04
SNHG5_ 85677794_ 85678032_ 85677794_ 85677899_ 85677953_ 85678032	RI	ENSG00000203875,11	SNHG5	chr6	1	0.074	0.0415491	-0.174	1	-0.248
SSPO_149791301_149791706_149791301_149791393_149791474_149791706	RI	ENSG00000197558,11	SSPO	chr7	1	0.243	0.00894825	0.618	1	0.375
STX16_ 58651271_ 58652087_ 58651271_ 58651414_ 58652072_ 58652087	RI	ENSG00000124222,22	STX16	chr20	0.403192	-0.106	0.00190911	-0.203	1	-0.097
TECR_ 14564785_ 14565123_ 14564785_ 14564858_ 14565065_ 14565123	RI	ENSG00000099797,14	TECR	chr19	1	0.004	1.54682e-06	-0.619	8.55888e-07	-0.623
TFR2_100627263_100627661_100627263_100627491_100627576_100627661	RI	ENSG00000106327,12	TFR2	chr7	0.0389416	0.129	1	0.017	0.560802	-0.112
TMEM138_ 61364249_ 61364518_ 61364249_ 61364315_ 61364432_ 61364518	RI	ENSG00000149483,11	TMEM138	chr11	0.363863	0.116	1	-0.052	0.00214899	-0.167
TMEM218_125102131_125102809_125102131_125102351_125102733_125102809	RI	ENSG00000150433,9	TMEM218	chr11	0.0152466	0.274	0.0196475	0.172	1	-0.101
TMUB2_ 44188934_ 44189299_ 44188934_ 44189091_ 44189206_ 44189299	RI	ENSG00000168591,15	TMUB2	chr17	0.339161	0.143	0.0440914	0.217	1	0.074
U2AF1L4_ 35743154_ 35743345_ 35743154_ 35743208_ 35743295_ 35743345	RI	ENSG00000161265,14	U2AF1L4	chr19	0.00067464	-0.714	1	-0.259	0.00294108	0.455
XPOT_ 64425037_ 64425457_ 64425037_ 64425138_ 64425337_ 64425457	RI	ENSG00000184575,11	XPOT	chr12	1	0.215	1	-0.067	0.000118318	-0.282
ZNF7_144829042_144829604_144829042_144829090_144829477_144829604	RI	ENSG00000147789,15	ZNF7	chr8	0.0389416	0.108	0.224923	0.074	1	-0.034
AAK1_ 69480859_ 69480961_ 69465845_ 69466551_ 69495984_ 69496080	SE	ENSG00000115977,18	AAK1	chr2	0.0418203	-0.237	0.341323	-0.277	1	-0.04
AAMDC_ 77831891_ 77832012_ 77821141_ 77821241_ 77841018_ 77841255	SE	ENSG00000087884,14	AAMDC	chr11	0.00427108	0.155	0.176062	0.102	0.536158	-0.053
ABCA11P_ 437445_ 437511_ 425814_ 426973_ 472574_ 472701	SE	ENSG00000251595,7	ABCA11P	chr4	0.44264	0.255	1	-0.164	0.0454386	-0.419
ABCB7_ 75114753_ 75114834_ 75112885_ 75112972_ 75156104_ 75156272	SE	ENSG00000131269,16	ABCB7	chrX	0.870664	0.078	1	-0.039	0.0268732	-0.117
ABCB8_151033604_151033917_151028422_151028610_151034272_151034428	SE	ENSG00000197150,12	ABCB8	chr7	1	0.012	0.00275935	-0.123	0.0102164	-0.135
ABCC4_ 95266111_ 95266264_ 95247642_ 95247753_ 95301240_ 95301302	SE	ENSG00000125257,14	ABCC4	chr13	1	-0.392	0.177278	0.027	0.0311415	0.42
ABI1_ 26763879_ 26763960_ 26751597_ 26751783_ 26765217_ 26765318	SE	ENSG00000136754,17	ABI1	chr10	0.0397465	-0.209	1	-0.542	1	-0.333
ABI2_203394699_203394846_203391043_203391143_203395655_203395780	SE	ENSG00000138443,15	ABI2	chr2	1	0.008	0.0110152	0.125	0.0251509	0.117
ABLIM1_114453378_114453483_114451623_114451671_114465697_114465827	SE	ENSG00000099204,19	ABLIM1	chr10	0.180833	0.105	1	-0.022	0.00260812	-0.127
AC000120,3_ 92244901_ 92245134_ 92242033_ 92242137_ 92245789_ 92245924	SE	ENSG00000285953,1	AC000120,3	chr7	1	0.154	0.071431	-0.146	0.0201503	-0.3
AC004130,1_ 20329689_ 20329782_ 20329366_ 20329513_ 20331649_ 20331747	SE	ENSG00000271133,5	AC004130,1	chr7	1	-0.383	0.00521014	-0.496	1	-0.113
AC004890,2_149288430_149289457_149287564_149287776_149289937_149290038	SE	ENSG00000244560,7	AC004890,2	chr7	1	-0.79	6.26672e-11	-0.79	NA	NA
AC006504,5_ 27797753_ 27798176_ 27793494_ 27793650_ 27805604_ 27805772	SE	ENSG00000267575,6	AC006504,5	chr19	1	-0.178	0.0410592	-0.398	0.137795	-0.219
AC006504,5_ 27797753_ 27798176_ 27794048_ 27794122_ 27805604_ 27805772	SE	ENSG00000267575,6	AC006504,5	chr19	0.0155455	0.24	0.000325068	0.621	0.410723	0.381
AC007566,1_ 92462957_ 92463026_ 92461318_ 92461410_ 92491242_ 92491610	SE	ENSG00000244055,1	AC007566,1	chr7	0.0331965	-0.276	0.0751459	-0.147	1	0.129
AC008267,2_ 66429883_ 66430017_ 66427948_ 66428040_ 66450070_ 66450236	SE	ENSG00000230189,7	AC008267,2	chr7	1	0.136	1	-0.424	0.00349181	-0.56
AC008966,1_ 53112239_ 53113034_ 53109841_ 53110148_ 53113858_ 53115123	SE	ENSG00000247796,2	AC008966,1	chr5	1	0.15	5.39957e-05	-0.553	0.00012079	-0.703
AC009041,2_ 976326_ 976400_ 975760_ 975995_ 976777_ 976912	SE	ENSG00000260807,6	AC009041,2	chr16	0.000165862	0.438	0.00483904	0.359	1	-0.079
AC009948,1_178426365_178426505_178413944_178414113_178430694_178430889	SE	ENSG00000223960,6	AC009948,1	chr2	1.68028e-05	0.319	0.00167646	0.235	1	-0.084
AC009948,1_178426365_178426505_178413944_178414113_178430769_178430889	SE	ENSG00000223960,6	AC009948,1	chr2	0.00198749	0.21	NA	NA	0.00129871	-0.21
AC009948,1_178426365_178426661_178413993_178414113_178430694_178430889	SE	ENSG00000223960,6	AC009948,1	chr2	2.11065e-06	0.474	0.00016406	0.341	1	-0.133
AC009948,1_178426365_178426661_178413993_178414113_178430769_178430889	SE	ENSG00000223960,6	AC009948,1	chr2	0.000639601	0.286	NA	NA	0.000360291	-0.286
AC009948,1_178426365_178426703_178414022_178414113_178430694_178430889	SE	ENSG00000223960,6	AC009948,1	chr2	1.07629e-06	0.515	NA	NA	1	-0.14
AC009948,1_178426365_178426703_178414022_178414113_178430769_178430889	SE	ENSG00000223960,6	AC009948,1	chr2	0.000348831	0.311	NA	NA	0.000218518	-0.311
AC010186,2_ 9656567_ 9656697_ 9655872_ 9655979_ 9656920_ 9656982	SE	ENSG00000256594,8	AC010186,2	chr12	0.254914	0.113	0.000292718	0.166	0.872417	0.053
AC010463,1_ 17273903_ 17274024_ 17268793_ 17269091_ 17276494_ 17276624	SE	ENSG00000269307,1	AC010463,1	chr19	NA	NA	0.0301198	0.294	1	0.294
AC010522,1_ 57820493_ 57820549_ 57819718_ 57819945_ 57856106_ 57856233	SE	ENSG00000268750,6	AC010522,1	chr19	0.976106	0.135	0.0321634	0.144	1	0.009
AC010522,1_ 57839022_ 57839149_ 57820493_ 57820549_ 57856103_ 57856233	SE	ENSG00000268750,6	AC010522,1	chr19	0.254914	0.369	0.0206999	0.431	1	0.062
AC019205,1_ 73270397_ 73270527_ 73263214_ 73263416_ 73299056_ 73301401	SE	ENSG00000229852,2	AC019205,1	chr6	0.320338	-0.274	0.673143	0.177	0.0124091	0.451
AC022167,2_ 8850932_ 8851050_ 8849848_ 8849993_ 8855033_ 8855217	SE	ENSG00000260276,2	AC022167,2	chr16	NA	NA	0.0100445	-0.466	NA	NA
AC022294,1_181439976_181440034_181438597_181438699_181442373_181442486	SE	ENSG00000241231,1	AC022294,1	chr3	0.383073	-0.188	0.000104401	-0.418	1	-0.23
AC026412,1_ 1626785_ 1626926_ 1602690_ 1602735_ 1632643_ 1632751	SE	ENSG00000188002,10	AC026412,1	chr5	1	0.283	NA	NA	0.00227054	-0.507
AC026412,1_ 1628754_ 1629630_ 1602690_ 1602735_ 1632643_ 1632751	SE	ENSG00000188002,10	AC026412,1	chr5	0.591383	0.37	0.00927696	-0.24	NA	NA
AC026412,1_ 1632643_ 1632751_ 1628754_ 1629630_ 1632844_ 1632906	SE	ENSG00000188002,10	AC026412,1	chr5	0.0275287	0.301	1	0.087	0.451306	-0.214
AC064875,1_ 13002423_ 13002608_ 13001587_ 13001741_ 13003780_ 13003951	SE	ENSG00000225649,5	AC064875,1	chr2	0.00516633	-0.196	1	-0.004	0.00551518	0.192
AC068152,1_ 47033277_ 47033381_ 47021581_ 47021721_ 47054117_ 47054213	SE	ENSG00000262879,5	AC068152,1	chr17	0.914447	0.039	1	-0.085	0.0204195	-0.124
AC068152,1_ 47054117_ 47054213_ 47021581_ 47021721_ 47056459_ 47056753	SE	ENSG00000262879,5	AC068152,1	chr17	1	0.034	0.0443329	0.473	0.0397767	0.439
AC068547,1_151860710_151860820_151855223_151855375_151870530_151870611	SE	ENSG00000283228,1	AC068547,1	chr2	0.0136425	-0.257	0.000239952	-0.388	1	-0.13
AC068547,1_151869176_151869735_151860710_151860820_151870530_151870611	SE	ENSG00000283228,1	AC068547,1	chr2	1	-0.175	0.0257301	-0.393	1	-0.218
AC079447,1_ 99206633_ 99206757_ 99195572_ 99195756_ 99215997_ 99216114	SE	ENSG00000241962,9	AC079447,1	chr2	1	0.047	0.453024	-0.327	0.0271819	-0.375
AC092821,3_ 9656567_ 9656649_ 9655872_ 9655979_ 9656920_ 9657302	SE	ENSG00000284634,1	AC092821,3	chr12	0.00226442	0.204	0.0279169	0.177	1	-0.027
AC092958,1_147995754_147995852_147940558_147940619_148006587_148006755	SE	ENSG00000239922,1	AC092958,1	chr3	0.0503205	-0.233	1	0.009	0.00133267	0.242
AC093157,1_101072659_101072830_101025877_101026061_101086851_101087268	SE	ENSG00000233184,6	AC093157,1	chr1	NA	NA	0.00294252	0.16	1	0.038
AC093157,1_101077362_101077508_101075394_101075716_101083460_101083574	SE	ENSG00000233184,6	AC093157,1	chr1	0.00344955	0.369	NA	NA	0.00230694	-0.369
AC097103,2_139419556_139419680_139389839_139389933_139423015_139423114	SE	ENSG00000248932,5	AC097103,2	chr3	1	0.112	0.0342604	0.222	0.0371833	0.111
AC097103,2_139419556_139419680_139389875_139390429_139423015_139423114	SE	ENSG00000248932,5	AC097103,2	chr3	0.00033759	0.477	1	0.04	0.000930215	-0.437
AC098487,1_102419263_102419359_102418716_102418988_102419696_102419794	SE	ENSG00000248161,5	AC098487,1	chr4	1	-0.111	0.861515	0.215	0.00287882	0.326
AC098487,1_102419263_102419359_102418716_102418988_102430396_102430498	SE	ENSG00000248161,5	AC098487,1	chr4	1	0.192	0.00182556	0.312	0.167494	0.12
AC098487,1_102419696_102419794_102418601_102418988_102431061_102431249	SE	ENSG00000248161,5	AC098487,1	chr4	1	0.021	1	-0.229	0.00491586	-0.25
AC098487,1_102419696_102419794_102419263_102419359_102431061_102431249	SE	ENSG00000248161,5	AC098487,1	chr4	0.00380137	-0.504	1	-0.356	1	0.148
AC098487,1_102430396_102430498_102419263_102419359_102431061_102431290	SE	ENSG00000248161,5	AC098487,1	chr4	0.000213379	-0.579	1	-0.254	1	0.325
AC105383,1_133140585_133140659_133139825_133139881_133142710_133142782	SE	ENSG00000250241,5	AC105383,1	chr4	0.743453	0.197	0.633571	-0.286	0.00933592	-0.483
AC109460,3_ 28981469_ 28982545_ 28977907_ 28978044_ 28982856_ 28982922	SE	ENSG00000261067,7	AC109460,3	chr16	1	-0.011	0.0311512	0.169	NA	NA
AC112128,1_113401583_113401739_113401239_113401287_113403851_113404016	SE	ENSG00000285943,1	AC112128,1	chr3	0.0165553	0.209	1	0.072	0.0280472	-0.137
AC118549,1_ 77631849_ 77633405_ 77584516_ 77584655_ 77641383_ 77641446	SE	ENSG00000036549,12	AC118549,1	chr1	0.0123648	-0.295	0.0118911	-0.295	NA	NA
AC118553,2_100017681_100017815_100015301_100015420_100049908_100050004	SE	ENSG00000283761,1	AC118553,2	chr1	3.63695e-05	0.46	1	0.122	0.103914	-0.337
AC135586,2_132704618_132704794_132690262_132690376_132714857_132714912	SE	ENSG00000256632,3	AC135586,2	chr12	1	-0.019	0.0138795	-0.355	0.0332788	-0.335
AC244021,1_121427981_121428064_121396959_121397304_121460018_121463429	SE	ENSG00000227082,2	AC244021,1	chr1	0.380439	-0.232	0.000172706	-0.474	0.154337	-0.242
AC245100,4_148424062_148424189_148420371_148420607_148424626_148424638	SE	ENSG00000231551,8	AC245100,4	chr1	1	0.061	0.000290747	0.698	1	0.637
ACAD10_111746143_111746284_111744570_111745043_111747048_111747186	SE	ENSG00000111271,14	ACAD10	chr12	0.0227859	-0.137	0.0106561	-0.141	1	-0.004
ACAD8_134257087_134257257_134256547_134256648_134258514_134258624	SE	ENSG00000151498,11	ACAD8	chr11	0.776927	-0.107	0.00276494	-0.193	0.163841	-0.086
ACADM_ 75728388_ 75728488_ 75724779_ 75724817_ 75732643_ 75732741	SE	ENSG00000117054,13	ACADM	chr1	0.00856435	0.146	0.679026	-0.023	1.82741e-05	-0.169
ACSF2_ 50464525_ 50464599_ 50464217_ 50464294_ 50471027_ 50471135	SE	ENSG00000167107,12	ACSF2	chr17	0.0158086	-0.222	0.529222	-0.077	0.498773	0.145
ACSF3_ 89100661_ 89101347_ 89093854_ 89093992_ 89102603_ 89102648	SE	ENSG00000176715,16	ACSF3	chr16	1	-0.182	0.00245288	-0.531	0.0149948	-0.349
ACSF3_ 89100661_ 89101347_ 89093882_ 89093996_ 89102603_ 89102648	SE	ENSG00000176715,16	ACSF3	chr16	0.104906	0.227	0.0196533	0.348	1	0.121
ACTR3B_152853493_152853577_152825029_152825122_152854457_152854949	SE	ENSG00000133627,17	ACTR3B	chr7	0.557576	-0.159	0.0121493	-0.217	1	-0.059
ADAT1_ 75618585_ 75618698_ 75617141_ 75617272_ 75620265_ 75620334	SE	ENSG00000065457,10	ADAT1	chr16	1	-0.062	0.0367743	-0.17	0.0601973	-0.109
ADCY9_ 4007367_ 4007558_ 3993348_ 3993510_ 4113749_ 4114026	SE	ENSG00000162104,9	ADCY9	chr16	1	-0.07	0.570817	0.068	0.0290836	0.138
ADCYAP1R1_ 31077990_ 31078098_ 31064830_ 31064936_ 31084140_ 31084250	SE	ENSG00000078549,14	ADCYAP1R1	chr7	1	-0.015	0.665863	0.172	0.0169779	0.187
ADCYAP1R1_ 31095666_ 31095750_ 31092643_ 31092735_ 31103236_ 31103366	SE	ENSG00000078549,14	ADCYAP1R1	chr7	0.482533	-0.131	0.121234	0.061	0.00490313	0.192
ADCYAP1R1_ 31100126_ 31100210_ 31095666_ 31095750_ 31103236_ 31103366	SE	ENSG00000078549,14	ADCYAP1R1	chr7	1	0.339	0.0189175	-0.309	0.00250973	-0.648
ADGRB2_ 31755998_ 31756815_ 31744647_ 31744731_ 31763883_ 31763922	SE	ENSG00000121753,12	ADGRB2	chr1	1	-0.067	0.0308871	-0.266	0.170227	-0.198
ADGRB3_ 69338915_ 69339014_ 69332922_ 69333008_ 69339332_ 69339504	SE	ENSG00000135298,13	ADGRB3	chr6	0.00482069	-0.154	0.226233	-0.09	1	0.064
ADGRL1_ 14167015_ 14167030_ 14164620_ 14164705_ 14170681_ 14170734	SE	ENSG00000072071,16	ADGRL1	chr19	0.00643992	0.517	1	0.201	0.0105845	-0.316
ADGRL3_ 61383123_ 61383189_ 61201257_ 61201765_ 61497120_ 61497348	SE	ENSG00000150471,16	ADGRL3	chr4	0.000865288	-0.315	0.000591413	-0.315	NA	NA
ADNP_ 50904765_ 50904849_ 50903888_ 50904001_ 50928650_ 50928816	SE	ENSG00000101126,16	ADNP	chr20	0.0291333	-0.102	0.00567657	-0.208	1	-0.107
ADNP_ 50904765_ 50904849_ 50903888_ 50904001_ 50930825_ 50930990	SE	ENSG00000101126,16	ADNP	chr20	0.000249211	-0.19	0.000104401	-0.235	1	-0.044
AFDN_167913402_167913423_167911283_167911489_167914167_167914313	SE	ENSG00000130396,20	AFDN	chr6	1	-0.004	0.0464434	-0.149	0.0692218	-0.145
AFG3L1P_ 89977604_ 89977802_ 89972616_ 89972765_ 89978809_ 89978878	SE	ENSG00000223959,8	AFG3L1P	chr16	0.018948	-0.272	1	-0.165	0.300986	0.106
AFG3L1P_ 89977677_ 89977802_ 89972592_ 89972765_ 89978809_ 89978878	SE	ENSG00000223959,8	AFG3L1P	chr16	0.0367081	-0.188	1	-0.097	0.399992	0.091
AGAP3_151139978_151140116_151134424_151134568_151141897_151142052	SE	ENSG00000133612,18	AGAP3	chr7	0.156864	0.112	1	-0.055	0.00348973	-0.166
AGBL3_134989249_134989310_134987874_134987996_134993492_134993678	SE	ENSG00000146856,14	AGBL3	chr7	0.826807	-0.135	0.010759	-0.269	1	-0.134
AGO3_ 36005718_ 36005858_ 36004340_ 36004475_ 36008689_ 36008777	SE	ENSG00000126070,19	AGO3	chr1	0.00832332	-0.144	0.0138361	-0.288	1	-0.144
AGPAT4_161165576_161165713_161153345_161153499_161166247_161166417	SE	ENSG00000026652,13	AGPAT4	chr6	1	-0.13	0.00897217	-0.399	1	-0.269
AHI1_135495813_135495898_135492227_135492291_135497187_135497249	SE	ENSG00000135541,20	AHI1	chr6	1.87378e-05	0.602	1	0.085	0.0100912	-0.517
AIMP2_ 6014901_ 6015052_ 6009254_ 6009378_ 6015145_ 6015352	SE	ENSG00000106305,9	AIMP2	chr7	0.00401612	-0.14	0.00539372	-0.161	1	-0.021
AKAP7_131199460_131199573_131169112_131169273_131219660_131219808	SE	ENSG00000118507,16	AKAP7	chr6	0.0190001	-0.114	0.018475	-0.114	NA	NA
AKT2_ 40268583_ 40268685_ 40265221_ 40265351_ 40270497_ 40270769	SE	ENSG00000105221,16	AKT2	chr19	0.0646888	-0.332	1	0.02	0.0065242	0.351
AL109811,4_ 11024063_ 11024335_ 11023192_ 11023329_ 11025109_ 11025208	SE	ENSG00000277726,4	AL109811,4	chr1	0.0116435	-0.335	0.524459	0.087	1	0.422
AL133352,1_100507424_100507567_100506320_100506420_100507907_100508051	SE	ENSG00000255339,6	AL133352,1	chr10	1	0.117	0.016358	-0.142	0.00623806	-0.259
AL139158,2_ 38102423_ 38102496_ 38047313_ 38047614_ 38103545_ 38103661	SE	ENSG00000224592,5	AL139158,2	chr1	0.034395	0.24	1	0.111	1	-0.129
AL139260,1_ 38875940_ 38876018_ 38859999_ 38860239_ 38913539_ 38913628	SE	ENSG00000228436,2	AL139260,1	chr1	1	-0.24	1	0.213	0.0162802	0.452
AL139300,1_103574106_103574170_103562961_103563124_103587273_103587364	SE	ENSG00000256500,5	AL139300,1	chr14	0.272908	-0.201	0.0190969	-0.262	NA	NA
AL139412,1_156455627_156455721_156446411_156446573_156456352_156456466	SE	ENSG00000236947,5	AL139412,1	chr1	NA	NA	9.54844e-05	0.457	1	0.457
AL157935,2_127897955_127898010_127896241_127896332_127899502_127899581	SE	ENSG00000257524,6	AL157935,2	chr9	0.172696	0.149	0.98409	-0.141	0.0337834	-0.29
AL355987,4_136809254_136809429_136807739_136808326_136809687_136810042	SE	ENSG00000273066,5	AL355987,4	chr9	0.485321	-0.161	0.00034583	-0.438	1	-0.277
AL360181,3_133401528_133401590_133399169_133399226_133402148_133402245	SE	ENSG00000254536,1	AL360181,3	chr10	0.0109231	-0.224	1	-0.09	0.0695033	0.134
ALG11_ 52024005_ 52024937_ 52018912_ 52019143_ 52028318_ 52028749	SE	ENSG00000253710,3	ALG11	chr13	0.662632	-0.18	0.00751515	-0.272	0.181797	-0.092
ALG8_ 78109441_ 78109581_ 78104355_ 78104453_ 78113885_ 78113989	SE	ENSG00000159063,12	ALG8	chr11	0.516838	-0.326	0.872262	0.062	0.000300386	0.388
ALKBH6_ 36013327_ 36013422_ 36013020_ 36013089_ 36014174_ 36014202	SE	ENSG00000239382,10	ALKBH6	chr19	1	-0.664	1	0.054	0.00015025	0.718
AMDHD2_ 2527572_ 2527615_ 2520983_ 2521123_ 2527772_ 2527836	SE	ENSG00000162066,15	AMDHD2	chr16	0.00941697	0.237	0.0103958	0.237	1	0.001
AMMECR1_110264488_110264599_110216517_110216632_110317598_110317771	SE	ENSG00000101935,9	AMMECR1	chrX	0.00137732	-0.222	0.218155	-0.116	1	0.105
AMOTL1_ 94795010_ 94795160_ 94740937_ 94740988_ 94799389_ 94799539	SE	ENSG00000166025,17	AMOTL1	chr11	0.172696	0.071	0.00316585	0.127	0.955563	0.057
ANAPC10_145097687_145097760_145095984_145096111_145098119_145098180	SE	ENSG00000164162,13	ANAPC10	chr4	1	0.017	0.291443	-0.104	0.0215587	-0.121
ANAPC16_ 72223887_ 72224056_ 72216047_ 72216138_ 72230365_ 72230440	SE	ENSG00000166295,8	ANAPC16	chr10	1	-0.058	0.0395066	-0.106	1	-0.048
ANK1_ 41661429_ 41661564_ 41653224_ 41655753_ 41661875_ 41661941	SE	ENSG00000029534,20	ANK1	chr8	1	-0.05	0.650919	0.405	0.0103769	0.456
ANK1_ 41672515_ 41672912_ 41672353_ 41672426_ 41684543_ 41684690	SE	ENSG00000029534,20	ANK1	chr8	1	0.095	0.0317102	-0.313	0.037739	-0.408
ANKAR_189705022_189705224_189696149_189696369_189706937_189707146	SE	ENSG00000151687,14	ANKAR	chr2	1	0.361	1	-0.422	6.77262e-06	-0.783
ANKDD1A_ 64926900_ 64926999_ 64926065_ 64926170_ 64930821_ 64930920	SE	ENSG00000166839,16	ANKDD1A	chr15	NA	NA	0.00480982	0.32	0.0040111	0.32
ANKDD1A_ 64944651_ 64944747_ 64943483_ 64943582_ 64947403_ 64947593	SE	ENSG00000166839,16	ANKDD1A	chr15	0.00526795	-0.235	0.684593	0.251	3.02628e-06	0.486
ANKMY1_240511860_240512001_240507559_240507691_240512801_240512942	SE	ENSG00000144504,15	ANKMY1	chr2	0.0864688	0.375	0.0329799	0.3	1	-0.075
ANKMY1_240526228_240526445_240525684_240525849_240529036_240529509	SE	ENSG00000144504,15	ANKMY1	chr2	0.00633683	0.343	1	-0.262	0.00062707	-0.605
ANKMY1_240529036_240529509_240525684_240525849_240560730_240560776	SE	ENSG00000144504,15	ANKMY1	chr2	0.00622198	-0.333	1	-0.083	1	0.25
ANKRD12_ 9195550_ 9195698_ 9182381_ 9182519_ 9208656_ 9208797	SE	ENSG00000101745,16	ANKRD12	chr18	1	-0.037	0.452202	0.07	0.0115281	0.107
ANKRD13C_ 70270855_ 70270956_ 70260587_ 70262847_ 70276764_ 70276843	SE	ENSG00000118454,12	ANKRD13C	chr1	1	-0.035	0.205376	-0.139	0.0331906	-0.104
ANKRD20A2_ 40227183_ 40227357_ 40226906_ 40227021_ 40231242_ 40231349	SE	ENSG00000183148,6	ANKRD20A2	chr9	0.00845288	0.517	NA	NA	1	-0.517
ANKRD36_ 97209799_ 97209872_ 97209680_ 97209709_ 97211545_ 97211574	SE	ENSG00000135976,18	ANKRD36	chr2	1	-0.081	0.0183584	-0.465	0.0645446	-0.384
ANKRD36C_ 95938828_ 95938901_ 95935615_ 95935644_ 95938986_ 95939015	SE	ENSG00000174501,14	ANKRD36C	chr2	0.029098	-0.48	1	-0.403	1	0.076
ANKRD6_ 89566833_ 89567096_ 89433169_ 89433375_ 89595915_ 89596014	SE	ENSG00000135299,16	ANKRD6	chr6	0.00182359	0.473	NA	NA	0.00119118	-0.473
ANKRD7_118236789_118236926_118236040_118236147_118239908_118239987	SE	ENSG00000106013,14	ANKRD7	chr7	0.0678265	-0.189	1	0.009	0.0191559	0.198
ANKS3_ 4726658_ 4726776_ 4724791_ 4724831_ 4726978_ 4727177	SE	ENSG00000168096,14	ANKS3	chr16	1	0.143	1	-0.043	0.0255153	-0.186
ANKS3_ 4726658_ 4726780_ 4724749_ 4724831_ 4726978_ 4727177	SE	ENSG00000168096,14	ANKS3	chr16	1	0.111	1	-0.033	0.0368267	-0.144
ANKS3_ 4726658_ 4726854_ 4724749_ 4724831_ 4726978_ 4727169	SE	ENSG00000168096,14	ANKS3	chr16	1	0.144	1	-0.046	0.0195375	-0.19
ANO6_ 45270461_ 45270524_ 45216084_ 45216391_ 45302013_ 45302093	SE	ENSG00000177119,15	ANO6	chr12	0.0176819	-0.093	0.0115418	-0.11	1	-0.017
ANP32B_ 98002275_ 98002387_ 97998555_ 97998678_ 98004934_ 98005135	SE	ENSG00000136938,8	ANP32B	chr9	0.00454902	0.447	1	0	0.00479361	-0.447
AP000295,1_ 33260596_ 33260727_ 33252661_ 33252830_ 33262792_ 33263637	SE	ENSG00000249624,9	AP000295,1	chr21	0.607782	0.084	0.98955	-0.036	0.0308227	-0.121
AP000347,1_ 23683724_ 23683867_ 23658093_ 23660000_ 23690231_ 23693185	SE	ENSG00000272578,5	AP000347,1	chr22	0.435184	0.244	0.0030783	0.325	1	0.081
AP000347,1_ 23686837_ 23686995_ 23683743_ 23683867_ 23690231_ 23690491	SE	ENSG00000272578,5	AP000347,1	chr22	0.0925259	0.186	1	-0.066	0.018637	-0.253
AP001362,2_ 65665420_ 65665543_ 65663085_ 65663148_ 65671422_ 65671716	SE	ENSG00000285533,1	AP001362,2	chr11	NA	NA	1	-0.128	0.0350992	0.205
AP002495,1_ 71923308_ 71923475_ 71918884_ 71919026_ 71928364_ 71928437	SE	ENSG00000254469,7	AP002495,1	chr11	0.327162	-0.143	0.00703364	-0.26	1	-0.117
AP003108,2_ 61438003_ 61438120_ 61430055_ 61430182_ 61445940_ 61446231	SE	ENSG00000256591,5	AP003108,2	chr11	0.0954794	0.101	1	-0.057	0.00442075	-0.158
AP1G2_ 23565815_ 23565892_ 23565605_ 23565701_ 23566063_ 23566160	SE	ENSG00000213983,11	AP1G2	chr14	0.0139362	-0.206	0.028984	-0.188	1	0.018
AP1G2_ 23566561_ 23566686_ 23566277_ 23566419_ 23567110_ 23567315	SE	ENSG00000213983,11	AP1G2	chr14	1	0.15	1	-0.139	0.0285001	-0.29
AP2M1_184180644_184180741_184180168_184180251_184180848_184180915	SE	ENSG00000161203,13	AP2M1	chr3	0.0495653	0.237	0.10811	0.211	1	-0.026
AP3S2_ 89877305_ 89877424_ 89871474_ 89871546_ 89878264_ 89878300	SE	ENSG00000157823,16	AP3S2	chr15	0.127095	-0.468	0.0416214	-0.2	1	0.268
AP4M1_100102674_100102746_100101879_100101968_100103408_100103519	SE	ENSG00000221838,9	AP4M1	chr7	1	-0.156	0.00355491	-0.284	0.073389	-0.128
AP4M1_100102674_100102781_100101865_100101968_100103408_100103519	SE	ENSG00000221838,9	AP4M1	chr7	1	-0.112	0.00592782	-0.245	0.086731	-0.133
APBB3_140561843_140561849_140561586_140561701_140562099_140562227	SE	ENSG00000113108,19	APBB3	chr5	1	0.552	0.000115995	0.716	1	0.164
APH1B_ 63287423_ 63287546_ 63286557_ 63286628_ 63302344_ 63302472	SE	ENSG00000138613,13	APH1B	chr15	0.0244777	0.121	1	0.012	0.038784	-0.108
ARFRP1_ 63701829_ 63701898_ 63699511_ 63700702_ 63702135_ 63706053	SE	ENSG00000101246,19	ARFRP1	chr20	0.0469636	0.15	1	0.068	1	-0.082
ARHGAP5_ 32090501_ 32094386_ 32077288_ 32077435_ 32117142_ 32117287	SE	ENSG00000100852,12	ARHGAP5	chr14	0.00815727	-0.355	1	0.011	0.00353036	0.365
ARHGEF39_ 35660093_ 35660967_ 35658874_ 35659173_ 35661712_ 35662002	SE	ENSG00000137135,17	ARHGEF39	chr9	1	-0.369	1	0.169	0.018358	0.538
ARHGEF40_ 21073931_ 21075180_ 21070269_ 21070399_ 21075331_ 21075499	SE	ENSG00000165801,9	ARHGEF40	chr14	0.0446897	0.132	0.0511803	0.167	1	0.035
ARID1B_157133027_157133207_157110471_157110561_157148623_157148951	SE	ENSG00000049618,23	ARID1B	chr6	1	-0.041	1	0.096	0.0149948	0.137
ARID4A_ 58347019_ 58347117_ 58346410_ 58346505_ 58347646_ 58347878	SE	ENSG00000032219,18	ARID4A	chr14	1	0.059	0.343072	-0.083	0.0152602	-0.142
ARIH2_ 48924717_ 48924839_ 48922747_ 48922811_ 48961611_ 48961679	SE	ENSG00000177479,19	ARIH2	chr3	0.147109	0.124	1	-0.058	0.00172897	-0.182
ARIH2_ 48927461_ 48927813_ 48922747_ 48922811_ 48961611_ 48961679	SE	ENSG00000177479,19	ARIH2	chr3	0.112917	0.113	1	-0.043	0.00204666	-0.155
ARL13B_ 93995873_ 93995944_ 93980148_ 93980482_ 94003658_ 94003908	SE	ENSG00000169379,15	ARL13B	chr3	1	-0.076	0.0115977	-0.171	0.792705	-0.094
ARL13B_ 93995877_ 93995944_ 93980213_ 93980482_ 94035330_ 94035436	SE	ENSG00000169379,15	ARL13B	chr3	0.00910471	0.333	0.0395066	0.463	1	0.13
ARL13B_ 93996547_ 93996684_ 93995873_ 93995944_ 94003658_ 94003902	SE	ENSG00000169379,15	ARL13B	chr3	0.0180042	0.133	1	-0.031	0.000248207	-0.164
ARL13B_ 93996562_ 93996684_ 93995873_ 93995944_ 94035330_ 94035436	SE	ENSG00000169379,15	ARL13B	chr3	1	-0.223	5.58499e-06	-0.647	0.0320467	-0.424
ARL13B_ 94003658_ 94003908_ 93995873_ 93995944_ 94035330_ 94035436	SE	ENSG00000169379,15	ARL13B	chr3	0.509131	-0.138	0.000698519	-0.238	0.7214	-0.1
ARMCX5-GPRASP2_102601463_102601509_102599525_102599847_102639399_102639527	SE	ENSG00000271147,7	ARMCX5-GPRASP2	chrX	0.0272723	-0.191	NA	NA	NA	NA
ARPP19_ 52564189_ 52564246_ 52557099_ 52557222_ 52568288_ 52568832	SE	ENSG00000128989,10	ARPP19	chr15	0.570543	-0.131	0.107176	0.349	0.00136231	0.479
ARRB2_ 4715012_ 4715043_ 4710488_ 4710744_ 4715972_ 4716033	SE	ENSG00000141480,17	ARRB2	chr17	0.591383	-0.139	1	0.063	0.024386	0.202
ARSB_ 78885583_ 78885827_ 78839355_ 78839426_ 78955294_ 78955374	SE	ENSG00000113273,16	ARSB	chr5	0.179922	-0.052	0.00894629	-0.117	1	-0.065
ASAH1_ 18064456_ 18064468_ 18063184_ 18063230_ 18067219_ 18067298	SE	ENSG00000104763,18	ASAH1	chr8	1	0.093	0.0479493	0.105	1	0.012
ASAH1_ 18064456_ 18064471_ 18063184_ 18063230_ 18067219_ 18067298	SE	ENSG00000104763,18	ASAH1	chr8	1	0.108	0.0395611	0.11	1	0.002
ASAH1_ 18064456_ 18064474_ 18063184_ 18063230_ 18067219_ 18067298	SE	ENSG00000104763,18	ASAH1	chr8	1	0.104	0.0416204	0.112	1	0.008
ATG10_ 82058494_ 82058602_ 81987557_ 81987678_ 82164398_ 82164537	SE	ENSG00000152348,15	ATG10	chr5	0.6085	-0.05	0.190266	0.163	0.000137034	0.213
ATG13_ 46630044_ 46630100_ 46618259_ 46618375_ 46644278_ 46644360	SE	ENSG00000175224,16	ATG13	chr11	0.909745	0.162	0.284581	-0.119	0.00551518	-0.281
ATG4B_241653306_241653369_241651883_241651974_241653511_241653524	SE	ENSG00000168397,16	ATG4B	chr2	0.0171571	0.268	NA	NA	0.0133419	-0.268
ATG4D_ 10546838_ 10547071_ 10544956_ 10545130_ 10547188_ 10547253	SE	ENSG00000130734,9	ATG4D	chr19	0.670539	-0.102	0.475901	0.137	0.000110017	0.239
ATG4D_ 10546838_ 10547082_ 10545119_ 10545130_ 10547188_ 10547253	SE	ENSG00000130734,9	ATG4D	chr19	0.571129	-0.116	0.527522	0.144	9.6872e-05	0.26
ATG4D_ 10546838_ 10547115_ 10544956_ 10545130_ 10547188_ 10547253	SE	ENSG00000130734,9	ATG4D	chr19	1	-0.067	0.337613	0.104	0.000420179	0.171
ATG7_ 11282192_ 11282438_ 11280993_ 11281102_ 11298685_ 11298855	SE	ENSG00000197548,12	ATG7	chr3	0.0856785	-0.145	0.00358745	-0.478	1	-0.333
ATG7_ 11313303_ 11313420_ 11308983_ 11309061_ 11315343_ 11315482	SE	ENSG00000197548,12	ATG7	chr3	1	0.029	0.00700664	0.152	0.0274588	0.123
ATP10D_ 47515475_ 47515670_ 47512503_ 47512830_ 47523011_ 47523216	SE	ENSG00000145246,13	ATP10D	chr4	0.022549	-0.169	0.0858932	-0.078	1	0.091
ATP11A_112878216_112878303_112875775_112875941_112881875_112886113	SE	ENSG00000068650,18	ATP11A	chr13	0.019939	-0.372	1	0.167	0.0023236	0.539
ATP11B_182905793_182905919_182902480_182902566_182913860_182913978	SE	ENSG00000058063,15	ATP11B	chr3	0.963705	0.075	0.000132281	0.657	0.0138723	0.582
ATP13A3_194457093_194457174_194455892_194455962_194459470_194459541	SE	ENSG00000133657,15	ATP13A3	chr3	0.374131	0.09	1	-0.04	0.0211306	-0.13
ATP1B3_141902135_141902227_141877528_141877562_141903619_141903748	SE	ENSG00000069849,10	ATP1B3	chr3	0.0353773	0.667	1	0.24	1	-0.427
ATP2C1_130894589_130894775_130893967_130894337_130930415_130930526	SE	ENSG00000017260,19	ATP2C1	chr3	0.00933725	0.153	0.00520687	0.169	1	0.017
ATP2C1_130894707_130894775_130893990_130894337_130930415_130930526	SE	ENSG00000017260,19	ATP2C1	chr3	0.0234441	0.187	0.00294249	0.197	1	0.01
ATP2C1_130894730_130894775_130894181_130894337_130930415_130930526	SE	ENSG00000017260,19	ATP2C1	chr3	0.0327674	0.195	0.00276494	0.239	1	0.043
ATP5F1C_ 7806973_ 7807010_ 7802757_ 7802854_ 7807658_ 7807793	SE	ENSG00000165629,19	ATP5F1C	chr10	1	-0.046	0.440871	0.062	0.0331486	0.108
ATP5MC2_ 53669870_ 53670114_ 53665238_ 53665428_ 53672575_ 53672645	SE	ENSG00000135390,18	ATP5MC2	chr12	NA	NA	0.00126005	0.417	0.000862022	0.417
ATP5MD_103395745_103396032_103394198_103394394_103396408_103396441	SE	ENSG00000173915,15	ATP5MD	chr10	0.0225991	0.31	1	0.095	0.0483819	-0.214
ATP6AP1L_ 82295492_ 82295544_ 82280959_ 82281011_ 82303486_ 82303527	SE	ENSG00000205464,12	ATP6AP1L	chr5	0.00864556	0.467	1	0.265	0.063653	-0.202
ATP9A_ 51690738_ 51690819_ 51676131_ 51676208_ 51696092_ 51696144	SE	ENSG00000054793,13	ATP9A	chr20	0.0460592	-0.542	1	-0.542	NA	NA
ATRIP_ 48459786_ 48459916_ 48459358_ 48459454_ 48460109_ 48460162	SE	ENSG00000164053,20	ATRIP	chr3	0.11227	0.085	1	-0.022	0.00739785	-0.108
ATXN2L_ 28836448_ 28836485_ 28835932_ 28836122_ 28836750_ 28837237	SE	ENSG00000168488,18	ATXN2L	chr16	1	0.086	0.466595	0.298	0.0353139	0.212
ATXN7_ 63997620_ 63997687_ 63995504_ 63996483_ 63999449_ 63999559	SE	ENSG00000163635,18	ATXN7	chr3	0.175096	-0.268	1	0.06	0.0452727	0.328
AURKA_ 56388686_ 56388784_ 56388155_ 56388202_ 56392153_ 56392215	SE	ENSG00000087586,17	AURKA	chr20	0.29474	-0.281	1	0.108	0.0332851	0.389
AURKA_ 56390555_ 56390665_ 56388686_ 56388784_ 56392153_ 56392215	SE	ENSG00000087586,17	AURKA	chr20	0.135343	0.186	1	-0.078	0.000521488	-0.264
AUTS2_ 70775356_ 70775386_ 70771548_ 70771644_ 70777102_ 70777174	SE	ENSG00000158321,16	AUTS2	chr7	0.0252031	-0.302	1	-0.147	1	0.155
AXIN1_ 346147_ 347106_ 314542_ 314683_ 352368_ 352449	SE	ENSG00000103126,14	AXIN1	chr16	0.021306	-0.347	1	-0.091	0.0962234	0.256
AZIN1-AS1_102967596_102967673_102937681_102937757_102977586_102977681	SE	ENSG00000253320,6	AZIN1-AS1	chr8	NA	NA	1	-0.081	0.00425913	-0.333
AZIN2_ 33082177_ 33082354_ 33081154_ 33081508_ 33083953_ 33084127	SE	ENSG00000142920,16	AZIN2	chr1	1	-0.025	0.0281037	-0.319	1	-0.294
AZIN2_ 33082177_ 33083142_ 33081390_ 33081508_ 33083953_ 33084127	SE	ENSG00000142920,16	AZIN2	chr1	1	-0.215	4.36846e-06	-0.821	0.00258422	-0.607
B4GALNT1_ 57631199_ 57631254_ 57630979_ 57631086_ 57631914_ 57632133	SE	ENSG00000135454,13	B4GALNT1	chr12	1	0.073	0.0110152	0.23	0.245704	0.157
B4GALNT1_ 57631199_ 57631364_ 57630979_ 57631086_ 57631914_ 57632133	SE	ENSG00000135454,13	B4GALNT1	chr12	1	0.018	0.0233213	0.118	0.150618	0.099
B4GALT4_119218649_119218772_119211739_119216344_119224057_119224245	SE	ENSG00000121578,12	B4GALT4	chr3	0.0139362	-0.127	0.309214	-0.078	1	0.049
B4GALT4_119218711_119218772_119216238_119216344_119224057_119224245	SE	ENSG00000121578,12	B4GALT4	chr3	0.00566575	-0.145	0.383496	-0.07	1	0.075
BAALC_103219464_103219554_103213410_103213594_103227988_103228166	SE	ENSG00000164929,16	BAALC	chr8	1	-0.004	0.0161711	-0.489	1	-0.485
BANP_ 87975047_ 87975203_ 87951431_ 87951515_ 87981035_ 87981127	SE	ENSG00000172530,20	BANP	chr16	0.0404927	0.233	0.0472847	0.247	1	0.013
BANP_ 87975047_ 87975207_ 87951434_ 87951515_ 87981035_ 87981127	SE	ENSG00000172530,20	BANP	chr16	0.040391	0.22	0.0150227	0.315	1	0.096
BARD1_214780559_214781509_214769231_214769312_214792296_214792445	SE	ENSG00000138376,10	BARD1	chr2	1	-0.124	0.566993	0.214	0.00353036	0.338
BAZ2B_159448241_159448403_159446781_159446975_159478574_159478721	SE	ENSG00000123636,17	BAZ2B	chr2	0.0397465	-0.256	1	-0.099	1	0.157
BAZ2B_159448241_159448409_159446781_159446975_159478574_159478721	SE	ENSG00000123636,17	BAZ2B	chr2	0.043003	-0.238	1	-0.113	1	0.125
BAZ2B_159453612_159453801_159448241_159448403_159478574_159478721	SE	ENSG00000123636,17	BAZ2B	chr2	0.00223126	0.354	1	0.081	0.0209686	-0.273
BBC3_ 47228157_ 47228446_ 47226563_ 47226754_ 47230928_ 47231194	SE	ENSG00000105327,17	BBC3	chr19	0.000275791	-0.386	1	-0.076	4.11335e-05	0.31
BBOF1_ 74049701_ 74050195_ 74040564_ 74040645_ 74055583_ 74055685	SE	ENSG00000119636,15	BBOF1	chr14	0.190679	0.2	NA	NA	0.00030143	-0.534
BCAT2_ 48806999_ 48807074_ 48800186_ 48800297_ 48810808_ 48810916	SE	ENSG00000105552,14	BCAT2	chr19	1	-0.029	1	0.346	0.00238564	0.375
BICRA_ 47681975_ 47682152_ 47679320_ 47681276_ 47694114_ 47694726	SE	ENSG00000063169,10	BICRA	chr19	5.56607e-07	-0.74	1	0.079	1.71765e-08	0.819
BIRC5_ 78215965_ 78216781_ 78214679_ 78214789_ 78222827_ 78222979	SE	ENSG00000089685,14	BIRC5	chr17	0.0371935	0.336	1	-0.091	0.0166409	-0.427
BLM_ 90759980_ 90760279_ 90754810_ 90754938_ 90760593_ 90761255	SE	ENSG00000197299,11	BLM	chr15	1	0.012	0.0178802	-0.21	0.00353036	-0.223
BLM_ 90760146_ 90760279_ 90754810_ 90754938_ 90760593_ 90761255	SE	ENSG00000197299,11	BLM	chr15	1	0.037	0.18092	-0.08	0.00336405	-0.116
BLOC1S6_ 45603099_ 45603187_ 45587235_ 45587525_ 45605427_ 45605470	SE	ENSG00000104164,10	BLOC1S6	chr15	1	-0.014	0.0404985	-0.15	0.0606877	-0.136
BLOC1S6_ 45603103_ 45603187_ 45587351_ 45587525_ 45605427_ 45605514	SE	ENSG00000104164,10	BLOC1S6	chr15	1	-0.027	0.0473248	-0.163	0.0974819	-0.137
BOLA2-SMG1P6_ 29446801_ 29447026_ 29444397_ 29444499_ 29454015_ 29454113	SE	ENSG00000261740,6	BOLA2-SMG1P6	chr16	1	0.032	0.0114603	-0.072	0.0268732	-0.104
BPHL_ 3138040_ 3138179_ 3137361_ 3137422_ 3140385_ 3140509	SE	ENSG00000137274,12	BPHL	chr6	1	-0.405	1	-0.1	0.0238924	0.305
BRIP1_ 61685835_ 61686165_ 61681265_ 61684140_ 61693429_ 61693512	SE	ENSG00000136492,8	BRIP1	chr17	0.0121504	0.148	0.0257301	0.199	1	0.051
BRIP1_ 61849128_ 61849256_ 61847100_ 61847220_ 61857057_ 61857231	SE	ENSG00000136492,8	BRIP1	chr17	0.15041	-0.08	1	0.042	0.0169076	0.122
BTN2A2_ 26385142_ 26385362_ 26383791_ 26383915_ 26388012_ 26388159	SE	ENSG00000124508,16	BTN2A2	chr6	1	0.201	0.0427427	0.378	0.724204	0.177
BTN2A3P_ 26427870_ 26428107_ 26426241_ 26426523_ 26428642_ 26428785	SE	ENSG00000124549,14	BTN2A3P	chr6	0.868105	-0.315	3.51199e-07	-0.618	0.0348396	-0.304
BTN3A3_ 26443569_ 26443659_ 26443366_ 26443442_ 26443956_ 26444284	SE	ENSG00000111801,15	BTN3A3	chr6	0.00566575	0.239	1	0.067	0.0645446	-0.172
BTN3A3_ 26443640_ 26443659_ 26443381_ 26443442_ 26443956_ 26444304	SE	ENSG00000111801,15	BTN3A3	chr6	0.00189753	0.625	1	0.268	1	-0.356
BTRC_101461980_101462058_101354106_101354228_101479367_101479457	SE	ENSG00000166167,17	BTRC	chr10	NA	NA	0.0321634	0.11	0.0276166	0.11
C12orf49_116723066_116723223_116719762_116719876_116737789_116738061	SE	ENSG00000111412,5	C12orf49	chr12	0.0333984	0.28	1	0.024	0.0379634	-0.256
C12orf49_116723066_116723223_116720295_116720447_116737789_116738061	SE	ENSG00000111412,5	C12orf49	chr12	0.656662	-0.09	0.00648484	-0.124	0.902575	-0.034
C16orf95_ 87311149_ 87311296_ 87305718_ 87305905_ 87314970_ 87315096	SE	ENSG00000260456,6	C16orf95	chr16	0.141555	0.101	0.0420811	0.113	NA	NA
C19orf12_ 29708253_ 29708423_ 29698885_ 29702977_ 29715124_ 29715224	SE	ENSG00000131943,17	C19orf12	chr19	0.0963586	0.184	0.0488943	0.267	1	0.084
C19orf44_ 16503064_ 16503380_ 16500791_ 16501551_ 16506700_ 16506774	SE	ENSG00000105072,8	C19orf44	chr19	0.841707	0.202	0.431145	-0.061	0.0124091	-0.263
C19orf57_ 13883307_ 13883400_ 13882354_ 13882952_ 13885960_ 13886055	SE	ENSG00000132016,11	C19orf57	chr19	3.59935e-05	-0.409	1	0.155	1.00264e-05	0.563
C19orf57_ 13895371_ 13895546_ 13893141_ 13893223_ 13904861_ 13904892	SE	ENSG00000132016,11	C19orf57	chr19	1	-0.016	0.00352149	0.212	0.00297294	0.229
C1orf109_ 37691458_ 37691581_ 37689645_ 37689886_ 37692029_ 37692216	SE	ENSG00000116922,14	C1orf109	chr1	0.0129928	0.365	1	0.165	0.525839	-0.2
C1orf61_156414653_156414753_156404255_156404601_156429375_156429392	SE	ENSG00000125462,16	C1orf61	chr1	0.971163	0.069	0.0576751	-0.105	0.00250579	-0.174
C1orf61_156416768_156416864_156414653_156414753_156417911_156418034	SE	ENSG00000125462,16	C1orf61	chr1	0.0505812	0.232	NA	NA	0.0415	-0.232
C1orf61_156417911_156418034_156414653_156414753_156420170_156420336	SE	ENSG00000125462,16	C1orf61	chr1	0.000865288	-0.265	1	-0.024	1	0.242
C1orf61_156426797_156426872_156404251_156404601_156429375_156429392	SE	ENSG00000125462,16	C1orf61	chr1	0.366424	0.073	0.0113857	-0.067	3.20723e-05	-0.14
C1RL_ 7108250_ 7108479_ 7101604_ 7102087_ 7109109_ 7109197	SE	ENSG00000139178,10	C1RL	chr12	0.047087	-0.376	0.0718754	-0.26	1	0.116
C21orf58_ 46318784_ 46318961_ 46318011_ 46318220_ 46320636_ 46320825	SE	ENSG00000160298,17	C21orf58	chr21	0.563487	-0.138	0.00357929	-0.218	0.874862	-0.08
C2CD2_ 41899052_ 41899347_ 41885111_ 41889344_ 41901621_ 41901652	SE	ENSG00000157617,16	C2CD2	chr21	0.0986425	0.13	1	-0.126	0.00318717	-0.256
C2CD2_ 41899052_ 41899362_ 41885111_ 41889344_ 41901621_ 41901749	SE	ENSG00000157617,16	C2CD2	chr21	1	0.094	1	-0.059	0.00892819	-0.153
C2CD3_ 74161398_ 74161556_ 74139604_ 74139828_ 74168343_ 74168613	SE	ENSG00000168014,16	C2CD3	chr11	0.509937	0.107	0.971482	-0.044	0.0438026	-0.15
C2orf76_119340158_119340361_119339826_119339971_119366356_119366682	SE	ENSG00000186132,14	C2orf76	chr2	0.317435	-0.087	0.00480982	-0.21	1	-0.123
C2orf76_119340158_119340361_119339826_119339971_119366435_119366742	SE	ENSG00000186132,14	C2orf76	chr2	0.211903	0.132	1	-0.073	0.00761915	-0.205
C3orf18_ 50565465_ 50565861_ 50561721_ 50561747_ 50567462_ 50567665	SE	ENSG00000088543,14	C3orf18	chr3	1	-0.272	0.0030189	-0.527	0.0296496	-0.255
C8orf44_ 66676744_ 66676902_ 66667651_ 66667701_ 66677641_ 66677954	SE	ENSG00000213865,7	C8orf44	chr8	0.742493	-0.515	5.93846e-09	-0.801	0.16841	-0.286
CALD1_134935687_134935765_134932987_134934077_134941091_134941237	SE	ENSG00000122786,19	CALD1	chr7	1	0.047	0.0494494	-0.088	0.0030858	-0.135
CAMK1_ 9765758_ 9765890_ 9763138_ 9763213_ 9767666_ 9767781	SE	ENSG00000134072,10	CAMK1	chr3	1	0.064	0.4407	-0.068	0.0371833	-0.132
CAPN10_240595933_240596521_240595023_240595304_240597887_240598087	SE	ENSG00000142330,19	CAPN10	chr2	0.0757516	0.389	1	-0.139	0.0371833	-0.528
CAPN7_ 15241452_ 15241588_ 15240753_ 15240853_ 15242177_ 15242253	SE	ENSG00000131375,9	CAPN7	chr3	0.0607797	-0.219	0.0386917	-0.212	1	0.007
CAPRIN2_ 30719078_ 30719225_ 30716289_ 30716676_ 30723258_ 30723314	SE	ENSG00000110888,17	CAPRIN2	chr12	1	0.29	0.0402194	-0.306	0.000420473	-0.596
CARD8_ 48223718_ 48223868_ 48221729_ 48221855_ 48231659_ 48232114	SE	ENSG00000105483,17	CARD8	chr19	1	0.195	NA	NA	0.0163523	0.38
CARD8_ 48230437_ 48230700_ 48221729_ 48221855_ 48231659_ 48231810	SE	ENSG00000105483,17	CARD8	chr19	NA	NA	0.0457546	0.109	0.113198	0.086
CARD8_ 48249522_ 48249633_ 48240961_ 48241063_ 48249750_ 48249810	SE	ENSG00000105483,17	CARD8	chr19	0.51041	0.103	1	-0.054	0.0423386	-0.156
CARF_202924356_202924415_202917876_202918043_202941859_202941980	SE	ENSG00000138380,17	CARF	chr2	0.0411995	0.169	1	-0.009	0.00623806	-0.178
CARHSP1_ 8868048_ 8868160_ 8859170_ 8859335_ 8868531_ 8868719	SE	ENSG00000153048,10	CARHSP1	chr16	0.109395	-0.292	0.0308021	-0.302	1	-0.01
CARMIL2_ 67656800_ 67656881_ 67656423_ 67656645_ 67657238_ 67657316	SE	ENSG00000159753,13	CARMIL2	chr16	1	0.843	1	0.134	0.00642081	-0.709
CASC15_ 21802656_ 21802740_ 21783631_ 21783708_ 21909469_ 21909603	SE	ENSG00000272168,6	CASC15	chr6	0.0243879	0.593	0.163649	0.21	0.426101	-0.383
CASK_ 41557031_ 41557100_ 41555599_ 41555635_ 41559778_ 41559847	SE	ENSG00000147044,21	CASK	chrX	0.000278609	-0.234	1	-0.008	0.000209479	0.225
CASP8_201272897_201272942_201272637_201272776_201276826_201276968	SE	ENSG00000064012,21	CASP8	chr2	1	-0.007	0.00251567	-0.307	0.00623806	-0.3
CASP8_201274888_201274953_201272637_201272776_201276826_201276968	SE	ENSG00000064012,21	CASP8	chr2	1	0.036	0.084078	-0.075	0.00921439	-0.111
CAST_ 96729152_ 96729209_ 96727488_ 96727530_ 96729611_ 96729691	SE	ENSG00000153113,23	CAST	chr5	0.0475513	-0.121	0.0955574	-0.103	1	0.018
CASTOR3_100211393_100211994_100200652_100202603_100213046_100213133	SE	ENSG00000239521,8	CASTOR3	chr7	1	-0.084	0.0161588	-0.351	0.381189	-0.267
CBWD1_ 146101_ 146158_ 134978_ 135030_ 152033_ 152078	SE	ENSG00000172785,18	CBWD1	chr9	0.257809	-0.214	1	0.036	0.00336405	0.25
CBWD5_ 65702969_ 65703014_ 65700250_ 65700337_ 65708901_ 65708958	SE	ENSG00000147996,16	CBWD5	chr9	1	-0.16	0.0170164	0.523	1	0.683
CBWD5_ 65707012_ 65707152_ 65702969_ 65703014_ 65708901_ 65708958	SE	ENSG00000147996,16	CBWD5	chr9	1	-0.197	0.0119107	-0.509	0.0180283	-0.313
CBWD6_ 41161600_ 41161723_ 41156382_ 41156439_ 41162332_ 41162377	SE	ENSG00000215126,10	CBWD6	chr9	0.408568	0.133	1	-0.077	0.0421201	-0.21
CBWD6_ 41165000_ 41165087_ 41162332_ 41162377_ 41166783_ 41166830	SE	ENSG00000215126,10	CBWD6	chr9	0.927329	-0.082	0.025559	-0.163	1	-0.081
CBY1_ 38656955_ 38657143_ 38656639_ 38656750_ 38665545_ 38665685	SE	ENSG00000100211,10	CBY1	chr22	0.0106954	-0.471	1	-0.369	1	0.101
CCDC102B_ 68823365_ 68823416_ 68798414_ 68798452_ 68836748_ 68837040	SE	ENSG00000150636,17	CCDC102B	chr18	1	0.017	1	-0.547	0.000360291	-0.564
CCDC136_128809449_128809644_128807359_128807545_128810138_128810366	SE	ENSG00000128596,16	CCDC136	chr7	1	0.192	0.270828	-0.401	4.42528e-05	-0.593
CCDC136_128817757_128817864_128815613_128815931_128821798_128822119	SE	ENSG00000128596,16	CCDC136	chr7	0.00566575	0.2	0.156077	0.146	1	-0.054
CCDC150_196672344_196672437_196669832_196669876_196674240_196674348	SE	ENSG00000144395,17	CCDC150	chr2	1	0.047	0.0404144	-0.161	0.00409468	-0.208
CCDC18-AS1_ 93326601_ 93326662_ 93325768_ 93325895_ 93337376_ 93339274	SE	ENSG00000223745,7	CCDC18-AS1	chr1	1	-0.247	0.00068354	0.322	1	0.569
CCDC18-AS1_ 93339155_ 93339274_ 93325768_ 93325895_ 93339356_ 93339536	SE	ENSG00000223745,7	CCDC18-AS1	chr1	NA	NA	0.0150227	0.273	0.0143773	0.273
CCDC18_ 93205509_ 93205631_ 93201891_ 93201988_ 93207106_ 93207398	SE	ENSG00000122483,17	CCDC18	chr1	0.00855269	0.18	1	0.019	1	-0.16
CCDC191_114031625_114031779_114018677_114018868_114034924_114035148	SE	ENSG00000163617,10	CCDC191	chr3	0.10522	-0.203	1	0.043	0.0332865	0.246
CCDC7_ 32567669_ 32567891_ 32565557_ 32565620_ 32584231_ 32584304	SE	ENSG00000216937,13	CCDC7	chr10	0.0576939	-0.441	1	0.264	0.000500546	0.706
CCDC78_ 723856_ 723936_ 722921_ 723161_ 724105_ 724205	SE	ENSG00000162004,16	CCDC78	chr16	1	-0.094	0.882241	0.04	0.0151713	0.135
CCDC88B_ 64355559_ 64355628_ 64355193_ 64355400_ 64357038_ 64357370	SE	ENSG00000168071,21	CCDC88B	chr11	0.00896838	0.291	NA	NA	0.00623806	-0.291
CCDC92_123944271_123944364_123943346_123943493_123972528_123972824	SE	ENSG00000119242,8	CCDC92	chr12	0.0584038	0.233	1	-0.108	0.00733349	-0.341
CCDC92_123956283_123956444_123943346_123943493_123972528_123972616	SE	ENSG00000119242,8	CCDC92	chr12	0.587716	0.112	0.651239	-0.321	0.0167914	-0.433
CCNI_ 77056248_ 77056323_ 77055149_ 77055380_ 77066248_ 77066405	SE	ENSG00000118816,9	CCNI	chr4	0.589142	0.258	0.00828016	-0.36	0.00012079	-0.618
CCNL2_ 1388625_ 1388743_ 1387953_ 1388065_ 1388949_ 1389047	SE	ENSG00000221978,11	CCNL2	chr1	0.781531	0.185	0.0075348	0.228	1	0.044
CCNL2_ 1391296_ 1391575_ 1390765_ 1390865_ 1392678_ 1392716	SE	ENSG00000221978,11	CCNL2	chr1	0.0167961	-0.267	1	-0.173	0.569014	0.094
CCNL2_ 1392678_ 1392803_ 1390765_ 1390865_ 1393395_ 1393460	SE	ENSG00000221978,11	CCNL2	chr1	0.00545878	0.113	0.992489	0.039	0.26455	-0.073
CCNL2_ 1392789_ 1392803_ 1390765_ 1390865_ 1393395_ 1393460	SE	ENSG00000221978,11	CCNL2	chr1	0.00662121	0.235	1	0.095	0.562536	-0.14
CCNT1_ 48695998_ 48696162_ 48695758_ 48695829_ 48698137_ 48698183	SE	ENSG00000129315,10	CCNT1	chr12	0.000249211	-0.166	0.000266562	-0.181	1	-0.015
CCNY_ 35516522_ 35516623_ 35501500_ 35501535_ 35529972_ 35530030	SE	ENSG00000108100,17	CCNY	chr10	0.0093112	0.117	1	0.07	1	-0.047
CCNY_ 35525963_ 35525999_ 35501500_ 35501535_ 35529972_ 35530030	SE	ENSG00000108100,17	CCNY	chr10	0.0106637	0.132	1	0.069	1	-0.063
CCNYL1_207733946_207734047_207726841_207726876_207737410_207737446	SE	ENSG00000163249,11	CCNYL1	chr2	1	-0.052	0.00655991	-0.21	0.140883	-0.157
CCNYL1_207740654_207740706_207726841_207726876_207742222_207742342	SE	ENSG00000163249,11	CCNYL1	chr2	1	0.06	NA	NA	0.044912	-0.192
CDC14B_ 96509672_ 96509789_ 96500107_ 96503789_ 96515648_ 96515792	SE	ENSG00000081377,16	CDC14B	chr9	0.427035	-0.253	0.0137179	-0.354	1	-0.102
CDC14B_ 96515648_ 96515792_ 96503564_ 96503789_ 96522505_ 96522603	SE	ENSG00000081377,16	CDC14B	chr9	1	0.1	0.000808893	0.363	0.0738621	0.263
CDC14B_ 96551795_ 96551872_ 96541825_ 96541892_ 96562692_ 96562785	SE	ENSG00000081377,16	CDC14B	chr9	0.100393	0.133	1	-0.054	0.000561592	-0.187
CDC25C_138289479_138289563_138287168_138287267_138291969_138292114	SE	ENSG00000158402,19	CDC25C	chr5	1	0.455	1	-0.545	3.30474e-08	-1
CDC27_ 47171916_ 47172064_ 47158205_ 47158303_ 47181561_ 47181637	SE	ENSG00000004897,11	CDC27	chr17	0.0265051	0.112	0.537588	0.058	NA	NA
CDC42BPA_227068653_227068701_227040130_227040236_227069776_227069853	SE	ENSG00000143776,18	CDC42BPA	chr1	1	0.02	NA	NA	0.0110572	0.37
CDC42BPA_227068653_227068701_227051880_227051985_227069776_227069853	SE	ENSG00000143776,18	CDC42BPA	chr1	1	-0.111	0.594207	0.103	0.0304946	0.214
CDIPT_ 29862585_ 29862635_ 29861105_ 29861259_ 29862814_ 29863276	SE	ENSG00000103502,13	CDIPT	chr16	1	0.081	0.0747667	-0.07	0.0105845	-0.151
CDK10_ 89687588_ 89687815_ 89686683_ 89686797_ 89689251_ 89689324	SE	ENSG00000185324,21	CDK10	chr16	0.00516907	-0.143	0.0106561	-0.184	1	-0.041
CDK20_ 87969795_ 87969919_ 87969193_ 87969349_ 87970775_ 87970897	SE	ENSG00000156345,17	CDK20	chr9	0.00187268	0.287	0.493451	0.142	1	-0.144
CDK20_ 87970567_ 87970630_ 87969795_ 87969919_ 87970775_ 87970897	SE	ENSG00000156345,17	CDK20	chr9	1	0.094	0.0392929	-0.271	0.0092621	-0.365
CDK5RAP1_ 33395012_ 33395116_ 33394031_ 33394066_ 33401427_ 33401505	SE	ENSG00000101391,20	CDK5RAP1	chr20	0.00633683	-0.178	1	0.016	0.00165091	0.195
CDK5RAP1_ 33396760_ 33397084_ 33394031_ 33394066_ 33401427_ 33401561	SE	ENSG00000101391,20	CDK5RAP1	chr20	2.10114e-05	-0.467	1	-0.132	0.00244237	0.336
CDKAL1_ 20535086_ 20535199_ 20534480_ 20534574_ 20535350_ 20535394	SE	ENSG00000145996,11	CDKAL1	chr6	0.750142	0.051	0.539387	-0.14	0.0383013	-0.191
CDKN1A_ 36677787_ 36677933_ 36676527_ 36676570_ 36684096_ 36684511	SE	ENSG00000124762,13	CDKN1A	chr6	0.00579849	-0.143	0.0732906	-0.061	0.620011	0.082
CDKN3_ 54399893_ 54399912_ 54396994_ 54397077_ 54408744_ 54408789	SE	ENSG00000100526,19	CDKN3	chr14	1	-0.274	0.04686	0.292	1	0.566
CDPF1_ 46248171_ 46248284_ 46247109_ 46247221_ 46250255_ 46250289	SE	ENSG00000205643,10	CDPF1	chr22	1	-0.135	1	0.031	0.0249456	0.166
CELF1_ 47471997_ 47472102_ 47470293_ 47470555_ 47472190_ 47472357	SE	ENSG00000149187,18	CELF1	chr11	0.00269411	0.362	0.0084698	0.338	1	-0.024
CEMIP_ 80873537_ 80873636_ 80779370_ 80779614_ 80873863_ 80873973	SE	ENSG00000103888,16	CEMIP	chr15	1	-0.067	0.0739635	0.111	0.00682677	0.179
CENPE_103139788_103140079_103138350_103138449_103140255_103140414	SE	ENSG00000138778,11	CENPE	chr4	0.0460592	0.034	0.160197	-0.1	1.14694e-05	-0.134
CENPL_173802962_173803505_173799549_173800519_173807266_173807310	SE	ENSG00000120334,15	CENPL	chr1	0.0487838	-0.131	1	0.016	0.0548703	0.148
CENPL_173806438_173806576_173799549_173800519_173807266_173807518	SE	ENSG00000120334,15	CENPL	chr1	1	-0.502	NA	NA	3.87803e-05	0.693
CEP135_ 56019352_ 56019555_ 56017647_ 56017857_ 56020675_ 56020780	SE	ENSG00000174799,10	CEP135	chr4	0.0132417	0.151	NA	NA	0.010314	-0.151
CEP250_ 35458303_ 35458374_ 35455200_ 35455516_ 35459982_ 35460105	SE	ENSG00000126001,15	CEP250	chr20	0.0442173	0.202	1	0.148	0.230469	-0.054
CEP250_ 35500048_ 35500169_ 35498594_ 35498716_ 35507737_ 35507851	SE	ENSG00000126001,15	CEP250	chr20	1	-0.075	0.669404	0.06	0.0111888	0.134
CEP295_ 93696319_ 93696417_ 93695496_ 93695673_ 93696681_ 93696854	SE	ENSG00000166004,14	CEP295	chr11	0.126424	0.137	1	-0.022	0.0423245	-0.159
CEP44_174316529_174316567_174316165_174316290_174317334_174318665	SE	ENSG00000164118,12	CEP44	chr4	0.864451	0.068	0.00149714	0.25	0.359374	0.182
CERS4_ 8210682_ 8210862_ 8209302_ 8209494_ 8251075_ 8251249	SE	ENSG00000090661,11	CERS4	chr19	1	-0.033	5.56394e-05	-0.372	0.000209479	-0.338
CERS4_ 8210705_ 8210862_ 8209312_ 8209494_ 8251043_ 8251249	SE	ENSG00000090661,11	CERS4	chr19	0.0304994	-0.172	0.04686	-0.146	1	0.026
CERS4_ 8210705_ 8210862_ 8209312_ 8209494_ 8251075_ 8251171	SE	ENSG00000090661,11	CERS4	chr19	1	0.012	0.00016406	-0.224	0.000779083	-0.236
CERS4_ 8241340_ 8241457_ 8209382_ 8209494_ 8251075_ 8251249	SE	ENSG00000090661,11	CERS4	chr19	1	-0.215	0.00167646	-0.67	0.00557957	-0.455
CFAP300_102075872_102076045_102066484_102066651_102081214_102081281	SE	ENSG00000137691,12	CFAP300	chr11	0.0130288	0.27	1	-0.038	0.00892819	-0.308
CFAP410_ 44335757_ 44335804_ 44333032_ 44333262_ 44337648_ 44337667	SE	ENSG00000160226,15	CFAP410	chr21	0.0301533	-0.123	0.290935	-0.099	0.649931	0.023
CFAP44_113333405_113333583_113330167_113330668_113358744_113358875	SE	ENSG00000206530,10	CFAP44	chr3	NA	NA	NA	NA	0.00847212	-0.571
CFAP44_113409105_113409322_113406926_113407041_113416524_113416627	SE	ENSG00000206530,10	CFAP44	chr3	1	0.024	4.29727e-07	-0.638	4.86981e-08	-0.662
CFAP54_ 96503885_ 96504029_ 96500833_ 96500939_ 96506927_ 96507099	SE	ENSG00000188596,10	CFAP54	chr12	1	0.225	0.00149714	0.595	1	0.37
CFDP1_ 75391379_ 75391508_ 75372290_ 75372568_ 75395089_ 75395136	SE	ENSG00000153774,8	CFDP1	chr16	0.0256506	-0.456	1	-0.003	0.00217477	0.452
CHD1L_147280025_147280191_147276103_147276257_147285323_147285487	SE	ENSG00000131778,18	CHD1L	chr1	1	0.041	0.0116484	-0.116	0.00123259	-0.157
CHD1L_147284350_147284499_147276103_147276257_147285323_147285487	SE	ENSG00000131778,18	CHD1L	chr1	1	0.044	0.00895366	-0.062	0.000107689	-0.107
CHD7_ 60741258_ 60743097_ 60678777_ 60679082_ 60780999_ 60781430	SE	ENSG00000171316,11	CHD7	chr8	0.000802696	-0.315	0.000669814	-0.315	NA	NA
CHRAC1_140514368_140514495_140511297_140511646_140515125_140515765	SE	ENSG00000104472,9	CHRAC1	chr8	1	-0.033	0.0402635	-0.123	0.289887	-0.09
CIAO2A_ 64081101_ 64081151_ 64075404_ 64075537_ 64088686_ 64088851	SE	ENSG00000166797,10	CIAO2A	chr15	0.0975405	0.09	0.10762	-0.063	4.89062e-06	-0.153
CIB2_ 78123704_ 78123739_ 78109234_ 78109382_ 78131164_ 78131225	SE	ENSG00000136425,13	CIB2	chr15	1	0.122	0.00130456	-0.431	0.000670368	-0.553
CKAP5_ 46753309_ 46753497_ 46751345_ 46751534_ 46758922_ 46759043	SE	ENSG00000175216,14	CKAP5	chr11	NA	NA	1	0.451	0.011348	0.451
CKLF_ 66558189_ 66558348_ 66552566_ 66552793_ 66563071_ 66563217	SE	ENSG00000217555,12	CKLF	chr16	1	-0.082	0.0209922	-0.165	0.644716	-0.083
CLASP1_121445448_121445496_121430072_121430177_121447336_121447507	SE	ENSG00000074054,18	CLASP1	chr2	1	0.028	0.100773	-0.078	0.0058008	-0.106
CLEC2D_ 9693415_ 9693948_ 9693033_ 9693115_ 9694759_ 9695138	SE	ENSG00000069493,14	CLEC2D	chr12	1	0.274	0.00362193	-0.396	1	-0.67
CLHC1_ 55206817_ 55206940_ 55206269_ 55206376_ 55209629_ 55209831	SE	ENSG00000162994,15	CLHC1	chr2	1	0.101	0.0140676	-0.502	0.000248207	-0.603
CLHC1_ 55209403_ 55209516_ 55206269_ 55206376_ 55209629_ 55209652	SE	ENSG00000162994,15	CLHC1	chr2	1	0.009	0.0559875	-0.509	0.024386	-0.518
CLMN_ 95193318_ 95193415_ 95191529_ 95191732_ 95193848_ 95193919	SE	ENSG00000165959,11	CLMN	chr14	0.0265051	0.151	0.0110152	0.168	NA	NA
CLOCK_ 55509911_ 55510065_ 55489373_ 55489465_ 55546781_ 55547138	SE	ENSG00000134852,14	CLOCK	chr4	1	0	0.0472847	0.198	0.0485023	0.198
CLUHP3_ 31701662_ 31701858_ 31700589_ 31700738_ 31702534_ 31702681	SE	ENSG00000131797,12	CLUHP3	chr16	1	0.051	0.000211745	0.561	0.377708	0.51
CLUHP3_ 31702534_ 31702681_ 31700634_ 31700738_ 31703155_ 31703367	SE	ENSG00000131797,12	CLUHP3	chr16	0.0112878	0.415	NA	NA	0.00861833	-0.415
CMC1_ 28263290_ 28263380_ 28241623_ 28241901_ 28316332_ 28316423	SE	ENSG00000187118,13	CMC1	chr3	1	-0.009	0.0061594	0.123	0.0013383	0.132
CNKSR2_ 21561470_ 21561560_ 21531855_ 21532067_ 21563237_ 21563452	SE	ENSG00000149970,15	CNKSR2	chrX	1	0.2	0.0178699	0.542	0.85974	0.342
CNOT10_ 32734799_ 32734976_ 32733422_ 32733544_ 32759457_ 32759571	SE	ENSG00000182973,18	CNOT10	chr3	1	0.134	1	-0.031	9.6872e-05	-0.165
CNOT2_ 70285399_ 70285586_ 70278131_ 70278274_ 70301704_ 70301865	SE	ENSG00000111596,12	CNOT2	chr12	0.00635872	0.614	1	-0.24	NA	NA
CNOT2_ 70332766_ 70332846_ 70319297_ 70319364_ 70335437_ 70335466	SE	ENSG00000111596,12	CNOT2	chr12	0.426976	-0.123	0.00472264	-0.271	0.275528	-0.148
CNOT8_154859352_154859496_154858638_154858801_154863206_154863395	SE	ENSG00000155508,13	CNOT8	chr5	NA	NA	0.0965425	-0.335	0.030036	-0.53
COA1_ 43650611_ 43650712_ 43647227_ 43648652_ 43665657_ 43665722	SE	ENSG00000106603,18	COA1	chr7	0.0848276	0.113	1	-0.03	0.0150661	-0.143
COASY_ 42562932_ 42563322_ 42562147_ 42562219_ 42564445_ 42564577	SE	ENSG00000068120,14	COASY	chr17	1	0.079	1	-0.318	0.0293895	-0.396
COBL_ 51083057_ 51083228_ 51043382_ 51043692_ 51085165_ 51085304	SE	ENSG00000106078,18	COBL	chr7	1	0.073	0.448068	-0.33	0.000769883	-0.403
COL9A1_ 70280811_ 70280874_ 70274718_ 70274772_ 70281003_ 70281039	SE	ENSG00000112280,16	COL9A1	chr6	0.00335671	-0.126	1	-0.089	1	0.037
COPZ2_ 48032685_ 48032741_ 48031645_ 48032233_ 48033862_ 48033944	SE	ENSG00000005243,9	COPZ2	chr17	0.0442173	-0.097	1	0.065	0.0113004	0.162
COQ5_120523884_120524002_120522213_120522363_120526456_120526546	SE	ENSG00000110871,14	COQ5	chr12	1	-0.03	0.0153911	-0.215	0.0294624	-0.184
CORO6_ 29619650_ 29619773_ 29619059_ 29619189_ 29621223_ 29621421	SE	ENSG00000167549,18	CORO6	chr17	0.00655771	0.291	1	0.134	0.107494	-0.157
CPA2_130275148_130275247_130273705_130273811_130276627_130276738	SE	ENSG00000158516,11	CPA2	chr7	0.026743	0.456	1	0	0.0195822	-0.456
CPNE5_ 36792395_ 36792443_ 36792032_ 36792096_ 36794589_ 36794649	SE	ENSG00000124772,11	CPNE5	chr6	1	0.465	0.0143383	0.311	1	-0.154
CRBN_ 3175162_ 3175266_ 3174058_ 3174261_ 3179620_ 3179710	SE	ENSG00000113851,14	CRBN	chr3	0.0309457	-0.162	1	-0.064	0.350091	0.098
CRBN_ 3175162_ 3175269_ 3173886_ 3174261_ 3179620_ 3179674	SE	ENSG00000113851,14	CRBN	chr3	0.0258433	-0.12	1	-0.054	0.371593	0.067
CREM_ 35188199_ 35188388_ 35179133_ 35179276_ 35201450_ 35201486	SE	ENSG00000095794,19	CREM	chr10	1	-0.127	0.0145707	-0.2	0.0332496	-0.072
CREM_ 35201450_ 35201486_ 35179133_ 35179276_ 35206894_ 35207051	SE	ENSG00000095794,19	CREM	chr10	0.0873495	0.09	0.0207997	0.102	1	0.012
CROCCP2_ 16633094_ 16633346_ 16632274_ 16632371_ 16635026_ 16635168	SE	ENSG00000215908,10	CROCCP2	chr1	1	-0.1	0.0118911	-0.171	1	-0.071
CROCCP2_ 16635026_ 16635168_ 16633094_ 16633346_ 16643027_ 16643145	SE	ENSG00000215908,10	CROCCP2	chr1	1	-0.025	0.0209826	0.191	0.0147508	0.216
CROCCP2_ 16642766_ 16642850_ 16633094_ 16633346_ 16643027_ 16643145	SE	ENSG00000215908,10	CROCCP2	chr1	1	-0.11	NA	NA	0.0127772	0.257
CRTC1_ 18771441_ 18771546_ 18768484_ 18768793_ 18775640_ 18775821	SE	ENSG00000105662,15	CRTC1	chr19	0.118045	0.191	1	-0.071	0.0127772	-0.262
CRYZ_ 74707102_ 74707204_ 74706898_ 74706994_ 74710097_ 74710247	SE	ENSG00000116791,13	CRYZ	chr1	0.0251066	0.159	0.777114	0.063	0.611878	-0.096
CSGALNACT1_ 19732455_ 19732566_ 19601770_ 19601865_ 19757849_ 19758029	SE	ENSG00000147408,14	CSGALNACT1	chr8	NA	NA	0.033375	-0.207	1	-0.234
CSNK1G3_123545416_123545841_123512098_123512570_123557494_123557564	SE	ENSG00000151292,17	CSNK1G3	chr5	0.0185829	-0.442	0.0178802	-0.442	NA	NA
CSNK2A1_ 527932_ 528049_ 505117_ 505229_ 543671_ 543712	SE	ENSG00000101266,18	CSNK2A1	chr20	0.828088	-0.266	5.67138e-09	-0.814	2.21992e-05	-0.548
CSNK2A1_ 527932_ 528049_ 508450_ 508660_ 543671_ 543712	SE	ENSG00000101266,18	CSNK2A1	chr20	0.00290509	-0.09	0.000797709	-0.105	1	-0.015
CSPP1_ 67074805_ 67074923_ 67074242_ 67074351_ 67076481_ 67076581	SE	ENSG00000104218,14	CSPP1	chr8	0.449963	-0.095	1	0.07	0.000936512	0.165
CTBP2_125122656_125122868_125110996_125111093_125159856_125159957	SE	ENSG00000175029,16	CTBP2	chr10	0.0341387	-0.579	0.477211	-0.228	0.289439	0.351
CTBP2_125133511_125133612_125038996_125039155_125160826_125161170	SE	ENSG00000175029,16	CTBP2	chr10	1	-0.754	NA	NA	0.000248207	0.616
CTBP2_125160318_125160520_125038996_125039155_125160826_125161170	SE	ENSG00000175029,16	CTBP2	chr10	0.0012172	-0.354	1	-0.017	0.00138102	0.336
CTC1_ 8228726_ 8228892_ 8228502_ 8228629_ 8229301_ 8229446	SE	ENSG00000178971,14	CTC1	chr17	0.877728	0.119	0.00949044	0.205	1	0.086
CTNND1_ 57789036_ 57789155_ 57761796_ 57762046_ 57795576_ 57795729	SE	ENSG00000198561,13	CTNND1	chr11	0.15712	-0.089	0.0173528	-0.109	NA	NA
CTNND1_ 57794009_ 57794081_ 57761796_ 57762046_ 57795576_ 57795729	SE	ENSG00000198561,13	CTNND1	chr11	0.368925	-0.116	0.0353713	-0.168	1	-0.052
CTNND1_ 57806460_ 57806478_ 57805881_ 57806035_ 57806914_ 57806983	SE	ENSG00000198561,13	CTNND1	chr11	0.0326915	0.106	1	0.016	0.118013	-0.091
CTNND2_ 11384664_ 11385229_ 11364695_ 11364890_ 11411535_ 11411652	SE	ENSG00000169862,18	CTNND2	chr5	0.0267467	-0.179	0.0257016	-0.179	NA	NA
CTSB_ 11862344_ 11862478_ 11853328_ 11853479_ 11864375_ 11864463	SE	ENSG00000164733,20	CTSB	chr8	NA	NA	0.0426854	-0.154	0.0375759	-0.154
CTTN_ 70422508_ 70422631_ 70420385_ 70420510_ 70422939_ 70422995	SE	ENSG00000085733,15	CTTN	chr11	0.028185	0.165	0.00421755	0.183	1	0.018
CTU2_ 88707135_ 88707210_ 88706462_ 88706598_ 88709937_ 88710016	SE	ENSG00000174177,12	CTU2	chr16	0.00442776	-0.106	0.0212138	-0.093	1	0.013
CUL5_108104189_108104902_108098405_108098529_108106206_108106852	SE	ENSG00000166266,13	CUL5	chr11	0.054651	-0.116	0.0241718	-0.156	1	-0.04
CUL9_ 43188522_ 43188715_ 43187712_ 43188118_ 43193000_ 43193208	SE	ENSG00000112659,13	CUL9	chr6	0.00896838	-0.192	1	-0.119	0.715172	0.074
CWF19L1_100250109_100250178_100246794_100246935_100253420_100253539	SE	ENSG00000095485,17	CWF19L1	chr10	1	-0.08	1	-0.702	8.20246e-05	-0.622
CYB561D1_109494519_109494623_109494098_109494287_109495142_109495180	SE	ENSG00000174151,14	CYB561D1	chr1	1	-0.011	0.00606048	-0.446	0.00937602	-0.435
CYB561D2_ 50352008_ 50352046_ 50350857_ 50351560_ 50353240_ 50354032	SE	ENSG00000114395,10	CYB561D2	chr3	0.0207929	0.156	0.734256	0.035	0.428798	-0.121
CYB5RL_ 54179148_ 54179352_ 54172335_ 54174822_ 54184160_ 54184265	SE	ENSG00000215883,10	CYB5RL	chr1	1	0.024	0.25119	-0.211	0.000670368	-0.235
CYP20A1_203246754_203246921_203245845_203245895_203251966_203252109	SE	ENSG00000119004,15	CYP20A1	chr2	0.0409758	0.183	1	-0.024	0.00759473	-0.207
CYP2R1_ 14880135_ 14880768_ 14879113_ 14879207_ 14885775_ 14885917	SE	ENSG00000186104,10	CYP2R1	chr11	0.352426	-0.375	1	0.059	0.00300925	0.434
CYP4F24P_ 15761208_ 15761375_ 15761084_ 15761149_ 15769584_ 15769714	SE	ENSG00000267594,5	CYP4F24P	chr19	0.000137016	-0.444	1	-0.18	0.0839194	0.264
CYTH1_ 78676994_ 78677050_ 78675655_ 78676169_ 78680189_ 78680344	SE	ENSG00000108669,16	CYTH1	chr17	0.0947085	0.107	0.0209826	0.129	1	0.022
D2HGDH_241749293_241749399_241748835_241748942_241750150_241750294	SE	ENSG00000180902,17	D2HGDH	chr2	NA	NA	1	0.185	0.0425356	0.404
D2HGDH_241749298_241749399_241748835_241748942_241750150_241750294	SE	ENSG00000180902,17	D2HGDH	chr2	0.104972	-0.122	1	0.191	0.043275	0.313
D2HGDH_241755044_241756014_241751245_241751388_241767709_241768811	SE	ENSG00000180902,17	D2HGDH	chr2	0.00702181	-0.238	1	0.055	0.000209479	0.293
DAB2IP_121742784_121742921_121678677_121678781_121757012_121757166	SE	ENSG00000136848,17	DAB2IP	chr9	0.463969	-0.561	0.0206173	-0.634	NA	NA
DAG1_ 49487253_ 49487415_ 49470315_ 49470433_ 49488625_ 49488745	SE	ENSG00000173402,11	DAG1	chr3	0.655767	0.131	0.356425	-0.331	0.00127683	-0.463
DAGLB_ 6416258_ 6416754_ 6412986_ 6413034_ 6416840_ 6416921	SE	ENSG00000164535,14	DAGLB	chr7	1	0.12	0.0110248	0.225	0.376019	0.106
DAGLB_ 6434761_ 6435020_ 6432836_ 6432959_ 6436361_ 6436533	SE	ENSG00000164535,14	DAGLB	chr7	0.549801	-0.092	0.000850713	-0.176	0.354702	-0.084
DBT_100206444_100206636_100206229_100206301_100210693_100210771	SE	ENSG00000137992,14	DBT	chr1	1	-0.034	0.289992	0.102	0.0492443	0.136
DCAF10_ 37819287_ 37819401_ 37800501_ 37801405_ 37842088_ 37842286	SE	ENSG00000122741,15	DCAF10	chr9	0.00784835	-0.106	0.0384511	-0.08	1	0.026
DCAF17_171457970_171458075_171453121_171453213_171468887_171469030	SE	ENSG00000115827,13	DCAF17	chr2	0.15712	0.194	1	-0.012	0.0353139	-0.206
DCLRE1C_ 14945434_ 14945565_ 14945104_ 14945189_ 14949035_ 14949087	SE	ENSG00000152457,17	DCLRE1C	chr10	0.364519	-0.155	0.885515	0.113	0.000204898	0.268
DCXR_ 82036413_ 82036448_ 82036283_ 82036308_ 82036543_ 82036581	SE	ENSG00000169738,7	DCXR	chr17	0.105586	-0.082	1	0.026	0.0337834	0.108
DDB2_ 47234572_ 47234672_ 47216857_ 47217049_ 47237836_ 47238001	SE	ENSG00000134574,11	DDB2	chr11	0.0723501	-0.211	0.0365355	-0.269	1	-0.058
DDHD1_ 53093315_ 53093444_ 53091784_ 53091932_ 53103682_ 53103856	SE	ENSG00000100523,14	DDHD1	chr14	0.047399	0.122	0.515815	0.09	1	-0.032
DDHD2_ 38234393_ 38234510_ 38232986_ 38233214_ 38237537_ 38237622	SE	ENSG00000085788,13	DDHD2	chr8	1	-0.023	0.187814	0.086	0.0285001	0.109
DDHD2_ 38234399_ 38234584_ 38232986_ 38233214_ 38237537_ 38237616	SE	ENSG00000085788,13	DDHD2	chr8	1	-0.009	0.219697	0.114	0.0366949	0.123
DDI2_ 15656616_ 15656679_ 15651705_ 15651895_ 15659836_ 15661057	SE	ENSG00000197312,11	DDI2	chr1	0.0006242	-0.287	0.835673	-0.199	1	0.088
DECR1_ 90005447_ 90005731_ 90001476_ 90001561_ 90018908_ 90018966	SE	ENSG00000104325,6	DECR1	chr8	0.664928	0.092	0.0146402	0.127	NA	NA
DENND4A_ 65700543_ 65700672_ 65697266_ 65697383_ 65701050_ 65701192	SE	ENSG00000174485,15	DENND4A	chr15	1	0.078	0.0276683	0.137	0.125286	0.06
DENND6B_ 50316565_ 50316626_ 50316369_ 50316475_ 50317292_ 50317373	SE	ENSG00000205593,11	DENND6B	chr22	1	0.349	1	-0.105	0.00145313	-0.454
DENND6B_ 50316565_ 50316712_ 50316369_ 50316475_ 50317292_ 50317373	SE	ENSG00000205593,11	DENND6B	chr22	1	0.419	1	-0.168	0.000107689	-0.588
DEPDC4_100263496_100263692_100262263_100262409_100266919_100267079	SE	ENSG00000166153,16	DEPDC4	chr12	0.00398644	-0.472	1	-0.059	0.0977998	0.413
DEPDC4_100263496_100263893_100262263_100262409_100266919_100267055	SE	ENSG00000166153,16	DEPDC4	chr12	0.00307079	-0.435	1	-0.014	0.0860645	0.421
DIAPH2_ 96763099_ 96763120_ 96758153_ 96758258_ 96881578_ 96881718	SE	ENSG00000147202,17	DIAPH2	chrX	0.0060248	-0.57	3.32397e-09	-0.926	0.00142587	-0.356
DIP2B_ 50692948_ 50693013_ 50686572_ 50686682_ 50695266_ 50695360	SE	ENSG00000066084,12	DIP2B	chr12	1	0.014	0.0233213	-0.09	0.010314	-0.104
DMXL2_ 51453549_ 51453641_ 51450194_ 51450346_ 51455150_ 51455213	SE	ENSG00000104093,13	DMXL2	chr15	1	-0.068	0.0212296	-0.203	1	-0.134
DNAAF4_ 55450221_ 55450367_ 55439471_ 55439581_ 55491122_ 55491256	SE	ENSG00000256061,7	DNAAF4	chr15	1	-0.073	0.00479499	0.436	1.95774e-06	0.508
DNMT3A_ 25249656_ 25249724_ 25248036_ 25248252_ 25251911_ 25252083	SE	ENSG00000119772,16	DNMT3A	chr2	1	0.156	0.0238433	0.41	NA	NA
DNMT3A_ 25249656_ 25249724_ 25248036_ 25248252_ 25274940_ 25275087	SE	ENSG00000119772,16	DNMT3A	chr2	1	0.04	0.00474839	0.2	0.00868952	0.159
DONSON_ 33583487_ 33583666_ 33582164_ 33582246_ 33584589_ 33584726	SE	ENSG00000159147,17	DONSON	chr21	1	-0.002	0.000405392	-0.147	0.000465128	-0.144
DPF3_ 72669951_ 72671338_ 72629623_ 72629736_ 72674239_ 72674368	SE	ENSG00000205683,11	DPF3	chr14	2.42622e-07	-0.66	NA	NA	1	0.19
DPH5_100995109_100995149_100990062_100990631_101013709_101013818	SE	ENSG00000117543,20	DPH5	chr1	1	0.116	0.0223519	0.29	0.151636	0.174
DPH5_101001466_101001544_100990062_100990631_101013709_101013818	SE	ENSG00000117543,20	DPH5	chr1	1	0.311	0.000832195	0.556	1	0.244
DPM1_ 50941128_ 50941209_ 50940864_ 50940933_ 50945736_ 50945762	SE	ENSG00000000419,12	DPM1	chr20	2.42622e-07	-0.924	2.85384e-07	-0.924	NA	NA
DPP8_ 65454262_ 65454415_ 65451959_ 65452102_ 65463760_ 65463906	SE	ENSG00000074603,18	DPP8	chr15	0.0921833	0.128	1	-0.051	0.00182335	-0.179
DPP8_ 65456224_ 65456371_ 65451959_ 65452102_ 65463760_ 65463845	SE	ENSG00000074603,18	DPP8	chr15	0.200983	0.093	1	-0.06	0.00363092	-0.153
DPY19L1P1_ 32593183_ 32593306_ 32585976_ 32586136_ 32620403_ 32620484	SE	ENSG00000229358,3	DPY19L1P1	chr7	0.0080834	0.426	1	0.333	0.112776	-0.093
DPY19L3_ 32467473_ 32468813_ 32464727_ 32464784_ 32477521_ 32477654	SE	ENSG00000178904,18	DPY19L3	chr19	0.257608	-0.188	0.00129073	-0.324	1	-0.136
DPY19L4_ 94765182_ 94765314_ 94761699_ 94761834_ 94765710_ 94765809	SE	ENSG00000156162,16	DPY19L4	chr8	1	-0.033	0.0269112	0.106	0.000343459	0.139
DTNBP1_ 15651312_ 15651363_ 15637743_ 15637804_ 15652086_ 15652140	SE	ENSG00000047579,19	DTNBP1	chr6	1	-0.051	0.613673	0.063	0.00339435	0.114
DTNBP1_ 15651312_ 15651408_ 15637743_ 15637804_ 15652086_ 15652140	SE	ENSG00000047579,19	DTNBP1	chr6	1	-0.143	0.767566	0.186	0.00012079	0.329
DTWD1_ 49633519_ 49633612_ 49625112_ 49625431_ 49634535_ 49634614	SE	ENSG00000104047,14	DTWD1	chr15	0.00187268	-0.568	1	0.252	1	0.82
DTX2P1_ 76995454_ 76995595_ 76990268_ 76990369_ 77000308_ 77000388	SE	ENSG00000186704,9	DTX2P1	chr7	0.0647403	-0.324	1	-0.066	0.0358017	0.258
DTX3_ 57605570_ 57605731_ 57604820_ 57604858_ 57605988_ 57606252	SE	ENSG00000178498,15	DTX3	chr12	1	0.094	1	-0.153	0.00169154	-0.247
DTYMK_241682798_241682915_241682154_241682333_241685768_241685877	SE	ENSG00000168393,12	DTYMK	chr2	3.06816e-05	-0.667	NA	NA	NA	NA
DUXAP10_ 19331481_ 19331617_ 19307020_ 19307111_ 19331834_ 19331924	SE	ENSG00000244306,11	DUXAP10	chr14	0.019083	0.329	1	-0.059	0.00063061	-0.388
DUXAP9_ 19092915_ 19093006_ 19068432_ 19068568_ 19130635_ 19131167	SE	ENSG00000225210,10	DUXAP9	chr14	0.324041	0.159	1	-0.019	0.0338185	-0.179
DYM_ 49391384_ 49391451_ 49390719_ 49390812_ 49391592_ 49391645	SE	ENSG00000141627,13	DYM	chr18	1	0.505	0.00375923	0.667	NA	NA
DYRK1A_ 37430268_ 37430400_ 37421773_ 37421866_ 37472683_ 37472829	SE	ENSG00000157540,20	DYRK1A	chr21	1	-0.126	1	0.08	0.0307728	0.206
DZIP1_ 95630713_ 95630813_ 95629988_ 95630113_ 95633233_ 95633321	SE	ENSG00000134874,17	DZIP1	chr13	0.0352435	0.104	0.117222	0.092	1	-0.012
DZIP1L_138084112_138084253_138081733_138081764_138086960_138087023	SE	ENSG00000158163,14	DZIP1L	chr3	0.120513	-0.123	0.0227612	-0.161	1	-0.038
E4F1_ 2233437_ 2233647_ 2233010_ 2233183_ 2233881_ 2233990	SE	ENSG00000167967,15	E4F1	chr16	1	-0.032	0.363123	0.08	0.0401382	0.112
ECPAS_111472896_111473000_111451424_111451555_111483984_111484057	SE	ENSG00000136813,14	ECPAS	chr9	0.0919407	0.173	1	-0.108	0.0006491	-0.281
EDA2R_ 66599473_ 66599866_ 66595641_ 66598093_ 66602632_ 66602797	SE	ENSG00000131080,14	EDA2R	chrX	0.0445082	-0.309	0.120245	-0.252	1	0.057
EDA2R_ 66605047_ 66605226_ 66602632_ 66602797_ 66615933_ 66616020	SE	ENSG00000131080,14	EDA2R	chrX	0.885374	0.263	1	-0.019	0.04708	-0.282
EDC3_ 74687090_ 74687179_ 74676940_ 74677022_ 74695879_ 74695936	SE	ENSG00000179151,12	EDC3	chr15	0.000419983	0.439	1	-0.037	1.95774e-06	-0.476
EEF1AKMT1_ 20737722_ 20737805_ 20731840_ 20732121_ 20757454_ 20757617	SE	ENSG00000150456,10	EEF1AKMT1	chr13	1	-0.046	0.00797137	-0.205	0.186901	-0.159
EEF2KMT_ 5091793_ 5091895_ 5090083_ 5090565_ 5095451_ 5095514	SE	ENSG00000118894,14	EEF2KMT	chr16	0.193978	-0.196	0.0161523	-0.217	1	-0.021
EGF_109993246_109993369_109988583_109988709_109994732_109994880	SE	ENSG00000138798,11	EGF	chr4	1	0.069	0.00539372	0.319	0.37764	0.25
EHD2_ 47716557_ 47717016_ 47713342_ 47713538_ 47718508_ 47718606	SE	ENSG00000024422,11	EHD2	chr19	0.00310052	-0.103	0.757742	-0.047	1	0.056
ELAVL1_ 7973558_ 7973625_ 7963629_ 7963807_ 7973724_ 7973878	SE	ENSG00000066044,14	ELAVL1	chr19	0.0440669	-0.2	1	-0.068	1	0.132
ELF2_139116648_139116807_139073453_139073567_139125163_139125329	SE	ENSG00000109381,19	ELF2	chr4	0.0130241	-0.226	1	0.028	0.000133893	0.254
ELMOD3_ 85363096_ 85363166_ 85362185_ 85362260_ 85368685_ 85368754	SE	ENSG00000115459,17	ELMOD3	chr2	0.855299	-0.108	0.0214145	-0.183	1	-0.076
ELMOD3_ 85371439_ 85371562_ 85371085_ 85371209_ 85377343_ 85377474	SE	ENSG00000115459,17	ELMOD3	chr2	0.0473345	0.201	1	0.088	0.493915	-0.114
ELOC_ 73970578_ 73970634_ 73959764_ 73959818_ 73971869_ 73971908	SE	ENSG00000154582,16	ELOC	chr8	1	-0.865	0.0225227	-0.532	1	0.333
EML2_ 45617629_ 45617697_ 45616764_ 45616853_ 45619059_ 45619090	SE	ENSG00000125746,16	EML2	chr19	0.0114432	0.148	0.807621	0.024	0.283517	-0.124
ENC1_ 74634683_ 74636362_ 74627408_ 74629992_ 74640306_ 74641424	SE	ENSG00000171617,13	ENC1	chr5	1	0.016	0.00149714	0.149	0.00261143	0.133
ENC1_ 74634683_ 74636498_ 74627405_ 74629992_ 74640306_ 74640429	SE	ENSG00000171617,13	ENC1	chr5	1	0.012	0.00355491	0.115	0.00616955	0.103
ENDOV_ 80422139_ 80422245_ 80415649_ 80415821_ 80423519_ 80423632	SE	ENSG00000173818,16	ENDOV	chr17	0.97997	-0.184	0.098175	0.366	2.96077e-06	0.55
ENDOV_ 80422205_ 80422245_ 80415314_ 80415821_ 80423519_ 80423587	SE	ENSG00000173818,16	ENDOV	chr17	1	-0.097	0.158854	0.14	6.09914e-05	0.237
ENKUR_ 24984209_ 24984376_ 24981978_ 24982770_ 24984735_ 24984905	SE	ENSG00000151023,16	ENKUR	chr10	0.352426	-0.071	1	0.237	0.049091	0.308
ENSA_150626478_150626526_150625554_150625808_150627311_150627592	SE	ENSG00000143420,18	ENSA	chr1	1	0.025	0.0411101	-0.391	1	-0.417
ENTR1_136408998_136409067_136407825_136407938_136409873_136410268	SE	ENSG00000165689,16	ENTR1	chr9	0.0197223	0.137	0.915663	0.065	NA	NA
EPB41L1_ 36214359_ 36214440_ 36212271_ 36212376_ 36221863_ 36221944	SE	ENSG00000088367,21	EPB41L1	chr20	0.720745	0.293	0.0150227	0.24	1	-0.053
EPB41L1_ 36219760_ 36219844_ 36218875_ 36218962_ 36221863_ 36221934	SE	ENSG00000088367,21	EPB41L1	chr20	1	0.021	0.091459	-0.103	0.03079	-0.124
EPB41L2_130876673_130876775_130870327_130870381_130885095_130885268	SE	ENSG00000079819,18	EPB41L2	chr6	0.687595	-0.187	0.0494494	-0.284	1	-0.097
EPB41L2_130878103_130878250_130870327_130870381_130885095_130885268	SE	ENSG00000079819,18	EPB41L2	chr6	1	-0.069	0.0178802	-0.232	0.530159	-0.163
EPC1_ 32273013_ 32273082_ 32272025_ 32272167_ 32273162_ 32273281	SE	ENSG00000120616,15	EPC1	chr10	1	0.013	0.258252	-0.217	0.0218503	-0.231
ERCC6_ 49524032_ 49524777_ 49515200_ 49517121_ 49528416_ 49528525	SE	ENSG00000225830,12	ERCC6	chr10	1	0.225	0.000200672	0.674	0.332711	0.449
ESCO1_ 21540576_ 21540700_ 21539919_ 21540009_ 21564202_ 21564317	SE	ENSG00000141446,10	ESCO1	chr18	0.0105586	0.241	1	-0.075	NA	NA
ETV1_ 13989267_ 13989464_ 13989007_ 13989139_ 13990552_ 13990690	SE	ENSG00000006468,13	ETV1	chr7	1	0.111	1	0	0.0435486	-0.111
EVA1C_ 32453311_ 32453508_ 32412005_ 32413013_ 32467695_ 32467848	SE	ENSG00000166979,12	EVA1C	chr21	1	-0.127	0.0388074	-0.173	0.70227	-0.046
EVI5_ 92624175_ 92624334_ 92607448_ 92607727_ 92625793_ 92625934	SE	ENSG00000067208,14	EVI5	chr1	0.455483	0.073	1	-0.032	0.0235799	-0.106
EXOC2_ 689138_ 689212_ 637700_ 637861_ 693018_ 693108	SE	ENSG00000112685,13	EXOC2	chr6	1	0.045	0.341913	-0.198	0.00197163	-0.242
EXOC7_ 76090328_ 76090397_ 76089174_ 76089320_ 76091142_ 76091235	SE	ENSG00000182473,21	EXOC7	chr17	0.040391	-0.154	1	-0.071	0.585144	0.083
F12_177404195_177404413_177403858_177404090_177404809_177404981	SE	ENSG00000131187,9	F12	chr5	1	0.107	0.0118515	0.35	0.0274588	0.243
FAM104A_ 73227164_ 73227182_ 73209604_ 73209768_ 73232085_ 73232320	SE	ENSG00000133193,12	FAM104A	chr17	1	0.174	1	-0.086	0.00880347	-0.26
FAM114A2_154038387_154038434_154034743_154034967_154038856_154038921	SE	ENSG00000055147,18	FAM114A2	chr5	1	0.025	0.0719915	-0.109	0.0438912	-0.133
FAM129B_127561147_127561237_127531724_127531778_127578921_127578989	SE	ENSG00000136830,11	FAM129B	chr9	NA	NA	0.00895366	-0.138	1	0.066
FAM149B1_ 73235192_ 73235318_ 73234816_ 73234940_ 73239311_ 73239384	SE	ENSG00000138286,14	FAM149B1	chr10	0.0026416	-0.185	0.0277129	-0.159	1	0.026
FAM151B_ 80505942_ 80506076_ 80501791_ 80501917_ 80513603_ 80513769	SE	ENSG00000152380,9	FAM151B	chr5	0.860951	-0.248	6.26672e-11	-0.891	0.0798087	-0.643
FAM172A_ 94050730_ 94050831_ 93964457_ 93964523_ 94053125_ 94053227	SE	ENSG00000113391,18	FAM172A	chr5	0.0338239	-0.175	1	-0.073	0.561655	0.102
FAM172A_ 94074645_ 94074769_ 94053125_ 94053227_ 94111510_ 94111635	SE	ENSG00000113391,18	FAM172A	chr5	0.0678265	-0.196	1	0.056	0.0311415	0.252
FAM189A1_ 1471992_ 1472127_ 1427301_ 1427409_ 1527901_ 1528012	SE	ENSG00000273564,2	FAM189A1	chrKI270905,1	1	-0.311	0.000974127	-0.311	NA	NA
FAM193B_177531281_177531521_177524184_177525205_177532442_177532533	SE	ENSG00000146067,15	FAM193B	chr5	0.971163	0.14	0.0438528	0.224	0.897243	0.084
FAM210A_ 13671861_ 13671973_ 13663346_ 13666713_ 13726328_ 13726560	SE	ENSG00000177150,12	FAM210A	chr18	0.00499283	-0.17	0.00276494	-0.177	NA	NA
FAM210A_ 13681604_ 13682105_ 13666002_ 13666713_ 13726328_ 13726505	SE	ENSG00000177150,12	FAM210A	chr18	0.0152908	-0.345	0.033269	-0.41	1	-0.064
FAM21EP_ 50056783_ 50056911_ 50054637_ 50054724_ 50059100_ 50059273	SE	ENSG00000235618,8	FAM21EP	chr10	0.202263	0.118	1	-0.419	0.00224033	-0.537
FAM227B_ 49577628_ 49577664_ 49577171_ 49577305_ 49588015_ 49588083	SE	ENSG00000166262,15	FAM227B	chr15	1	0.236	0.0269112	0.294	1	0.058
FAM45A_119105310_119105495_119104763_119105022_119107947_119108096	SE	ENSG00000119979,17	FAM45A	chr10	1	-0.099	0.0313276	-0.466	0.0415	-0.367
FAM49B_129880375_129880458_129871374_129871496_129903311_129903350	SE	ENSG00000153310,19	FAM49B	chr8	1	0.014	0.0259703	-0.301	0.0718105	-0.315
FAM66C_ 8193519_ 8193655_ 8188484_ 8188535_ 8194202_ 8194481	SE	ENSG00000226711,6	FAM66C	chr12	2.10114e-05	0.776	0.0030189	0.641	1	-0.135
FAM86DP_ 75429135_ 75429237_ 75426449_ 75426599_ 75430831_ 75430914	SE	ENSG00000244026,6	FAM86DP	chr3	0.00974651	-0.154	1	-0.016	0.0285001	0.137
FAM86DP_ 75429135_ 75429237_ 75426449_ 75426621_ 75430831_ 75430914	SE	ENSG00000244026,6	FAM86DP	chr3	0.015145	-0.261	NA	NA	1	0.155
FAM86HP_130104165_130104297_130102763_130102935_130111278_130111432	SE	ENSG00000253540,5	FAM86HP	chr3	NA	NA	NA	NA	0.00244237	-0.441
FANCB_ 14868922_ 14869043_ 14864559_ 14865580_ 14872985_ 14873052	SE	ENSG00000181544,14	FANCB	chrX	0.462742	-0.121	0.0105624	-0.211	1	-0.09
FANCI_ 89245194_ 89245311_ 89244249_ 89244280_ 89245755_ 89245839	SE	ENSG00000140525,17	FANCI	chr15	1	-0.067	1	-0.334	0.0353089	-0.266
FASTKD3_ 7866645_ 7868196_ 7865897_ 7865983_ 7868978_ 7869002	SE	ENSG00000124279,11	FASTKD3	chr5	0.00695335	-0.474	1	-0.152	0.290739	0.322
FAXDC2_154838130_154838178_154834842_154834934_154850482_154850590	SE	ENSG00000170271,10	FAXDC2	chr5	NA	NA	0.0104655	0.23	0.00880347	0.23
FBN3_ 8087076_ 8087211_ 8086199_ 8086325_ 8087824_ 8087947	SE	ENSG00000142449,12	FBN3	chr19	0.0042577	-0.213	0.175327	-0.13	1	0.082
FBXL12_ 9813230_ 9813274_ 9810266_ 9811717_ 9818544_ 9818617	SE	ENSG00000127452,8	FBXL12	chr19	0.121406	0.048	0.164015	-0.124	2.20844e-05	-0.173
FBXO16_ 28473771_ 28473807_ 28463611_ 28463818_ 28483347_ 28483462	SE	ENSG00000214050,7	FBXO16	chr8	1	-0.088	0.569243	0.104	0.024386	0.191
FBXO31_ 87358410_ 87358497_ 87347173_ 87347250_ 87360294_ 87360366	SE	ENSG00000103264,17	FBXO31	chr16	0.0281875	0.072	1	-0.034	0.00201666	-0.106
FBXW11_171957596_171957698_171914342_171914405_172006457_172006548	SE	ENSG00000072803,17	FBXW11	chr5	1	0.016	0.0786617	-0.171	0.0435486	-0.187
FCHO2_ 73078179_ 73078312_ 73077337_ 73077493_ 73081782_ 73081982	SE	ENSG00000157107,13	FCHO2	chr5	0.0196125	-0.126	0.0190774	-0.126	NA	NA
FDFT1_ 11821749_ 11821878_ 11809255_ 11809850_ 11826023_ 11826096	SE	ENSG00000079459,12	FDFT1	chr8	0.00566575	-0.525	1	-0.269	0.0288407	0.256
FER_108954728_108954932_108946129_108946222_108959224_108959347	SE	ENSG00000151422,12	FER	chr5	0.00372396	-0.176	0.00309558	-0.176	NA	NA
FGGY_ 59638227_ 59638375_ 59625987_ 59626049_ 59660218_ 59660293	SE	ENSG00000172456,17	FGGY	chr1	0.832083	0.026	0.0147167	-0.136	1	-0.162
FKBP7_178477061_178477213_178473028_178473142_178478278_178478317	SE	ENSG00000079150,17	FKBP7	chr2	0.1207	0.117	1	0	0.0281004	-0.117
FKRP_ 46748514_ 46748621_ 46748026_ 46748088_ 46755411_ 46755768	SE	ENSG00000181027,10	FKRP	chr19	0.000344417	0.327	2.72953e-06	0.454	1	0.126
FKRP_ 46748514_ 46748665_ 46747658_ 46748088_ 46755411_ 46755463	SE	ENSG00000181027,10	FKRP	chr19	0.002066	0.202	3.95255e-05	0.277	1	0.076
FKRP_ 46748514_ 46748717_ 46748026_ 46748088_ 46755411_ 46755610	SE	ENSG00000181027,10	FKRP	chr19	0.00128535	0.258	3.30856e-05	0.332	1	0.074
FKRP_ 46748514_ 46748884_ 46748026_ 46748088_ 46755411_ 46755449	SE	ENSG00000181027,10	FKRP	chr19	4.50691e-05	0.431	1.04611e-07	0.569	1	0.138
FKTN_105598085_105598183_105596597_105596657_105601144_105601348	SE	ENSG00000106692,14	FKTN	chr9	0.783431	0.027	0.572836	-0.079	0.00759473	-0.107
FKTN_105617958_105618092_105615277_105615407_105635050_105635148	SE	ENSG00000106692,14	FKTN	chr9	0.0177907	0.212	NA	NA	NA	NA
FKTN_105619933_105620061_105615277_105615407_105635050_105635148	SE	ENSG00000106692,14	FKTN	chr9	0.0179966	0.139	NA	NA	0.0142258	-0.139
FLOT2_ 28885856_ 28885947_ 28884224_ 28884315_ 28897525_ 28897652	SE	ENSG00000132589,15	FLOT2	chr17	1	0.084	0.0325473	-0.454	0.00409468	-0.538
FNIP1_131730903_131731038_131719316_131719417_131744563_131744690	SE	ENSG00000217128,11	FNIP1	chr5	0.00819883	-0.164	0.0298864	-0.154	1	0.01
FOSL1_ 65896808_ 65897006_ 65892473_ 65893296_ 65900240_ 65900419	SE	ENSG00000175592,8	FOSL1	chr11	0.0318717	0.191	0.159056	0.113	1	-0.078
FOXM1_ 2864884_ 2864945_ 2864682_ 2864755_ 2865354_ 2865399	SE	ENSG00000111206,12	FOXM1	chr12	0.0487838	-0.103	1	-0.039	0.736569	0.064
FOXN2_ 48328560_ 48328702_ 48314709_ 48314814_ 48346200_ 48346751	SE	ENSG00000170802,15	FOXN2	chr2	1	-0.03	0.00480982	0.241	0.0398212	0.271
FOXRED1_126271219_126271657_126269200_126269291_126272968_126273079	SE	ENSG00000110074,10	FOXRED1	chr11	0.00655771	0.213	1	0.027	0.024875	-0.187
FRYL_ 48549472_ 48549623_ 48548689_ 48548793_ 48550591_ 48550704	SE	ENSG00000075539,14	FRYL	chr4	0.022549	-0.144	0.099727	-0.114	1	0.03
FSD1L_105484380_105484502_105471903_105472005_105506398_105506475	SE	ENSG00000106701,11	FSD1L	chr9	0.297599	-0.15	0.356385	0.303	0.00265775	0.453
FSD1L_105513598_105513631_105512806_105512936_105534492_105534593	SE	ENSG00000106701,11	FSD1L	chr9	0.00815727	-0.255	1	-0.203	1	0.052
FUK_ 70467373_ 70467471_ 70466881_ 70466954_ 70468848_ 70468968	SE	ENSG00000157353,16	FUK	chr16	NA	NA	0.028984	0.437	0.0249142	0.437
FYN_111846588_111846629_111780565_111780635_111872967_111873037	SE	ENSG00000010810,17	FYN	chr6	0.797828	0.074	0.0298864	-0.138	0.000250738	-0.213
G2E3_ 30605504_ 30605812_ 30601998_ 30602131_ 30607887_ 30608002	SE	ENSG00000092140,15	G2E3	chr14	0.00570383	0.406	1	0.196	0.524815	-0.21
GABBR1_ 874410_ 874561_ 873782_ 873915_ 876100_ 876178	SE	ENSG00000237051,8	GABBR1	chrGL000253,2	0.00470575	-0.428	1	0.043	1	0.471
GAD1_170842568_170842648_170836792_170836883_170844044_170844157	SE	ENSG00000128683,13	GAD1	chr2	0.0133305	-0.281	1	-0.131	0.111447	0.15
GALNS_ 88842705_ 88842829_ 88841896_ 88841971_ 88856757_ 88856966	SE	ENSG00000141012,12	GALNS	chr16	1	-0.012	0.0457279	-0.114	0.00780086	-0.102
GANC_ 42329305_ 42329449_ 42327362_ 42327442_ 42330575_ 42330672	SE	ENSG00000214013,9	GANC	chr15	0.000467394	0.282	1	-0.001	0.000209479	-0.283
GAS2L3_100591735_100591856_100573710_100573785_100594874_100594922	SE	ENSG00000139354,10	GAS2L3	chr12	0.699046	0.103	0.0107188	0.166	1	0.063
GATAD2A_ 19427695_ 19427992_ 19386022_ 19386138_ 19436130_ 19436219	SE	ENSG00000167491,17	GATAD2A	chr19	1	0.419	1	0.054	0.0024395	-0.366
GATAD2A_ 19427695_ 19427992_ 19405837_ 19406019_ 19436130_ 19436219	SE	ENSG00000167491,17	GATAD2A	chr19	0.0239186	0.202	1	-0.214	0.0512467	-0.416
GATB_151672761_151672896_151670503_151671302_151679812_151679891	SE	ENSG00000059691,11	GATB	chr4	0.720713	0.072	0.285879	-0.035	0.00225939	-0.108
GATD1_ 770678_ 770903_ 767224_ 770398_ 770992_ 771104	SE	ENSG00000177225,16	GATD1	chr11	0.0355097	-0.112	0.710522	-0.043	1	0.069
GATD1_ 770678_ 770903_ 767224_ 770398_ 771332_ 771426	SE	ENSG00000177225,16	GATD1	chr11	NA	NA	0.0227982	0.534	1	0.284
GCFC2_ 75691976_ 75692100_ 75690487_ 75690719_ 75694240_ 75694427	SE	ENSG00000005436,13	GCFC2	chr2	0.00791365	-0.162	0.0487668	-0.15	1	0.012
GGA1_ 37613118_ 37613191_ 37608976_ 37609154_ 37614189_ 37614195	SE	ENSG00000100083,18	GGA1	chr22	0.00136845	-0.514	0.451376	-0.325	0.141326	0.188
GGT1_ 24609964_ 24610033_ 24607953_ 24608023_ 24610357_ 24610531	SE	ENSG00000100031,18	GGT1	chr22	1.62578e-05	-0.654	1	-0.228	0.000565431	0.425
GID4_ 18061844_ 18061975_ 18058867_ 18058969_ 18065179_ 18065283	SE	ENSG00000141034,9	GID4	chr17	0.00209587	0.165	NA	NA	0.00136231	-0.165
GIN1_103097313_103097490_103096540_103096826_103097589_103097781	SE	ENSG00000145723,16	GIN1	chr5	0.104776	-0.065	0.0150227	-0.12	1	-0.055
GIT2_109947255_109947504_109939164_109939247_109951211_109951316	SE	ENSG00000139436,20	GIT2	chr12	0.0042577	-0.418	0.00053313	-0.531	1	-0.113
GLMN_ 92266699_ 92266741_ 92266418_ 92266492_ 92267912_ 92268002	SE	ENSG00000174842,16	GLMN	chr1	0.402375	-0.187	0.00303336	-0.268	0.967329	-0.082
GLS_190913192_190913364_190910262_190910321_190920214_190920248	SE	ENSG00000115419,12	GLS	chr2	1	0.074	0.0944497	-0.253	0.0375933	-0.327
GNB1L_ 19821227_ 19821375_ 19812294_ 19812447_ 19854442_ 19854539	SE	ENSG00000185838,13	GNB1L	chr22	0.0292345	0.2	1	-0.041	0.00696896	-0.241
GNPDA1_142012287_142012339_142011911_142012041_142012668_142012996	SE	ENSG00000113552,15	GNPDA1	chr5	0.557212	-0.21	0.00149714	-0.371	1	-0.161
GNPDA1_142012287_142012377_142011911_142012041_142012668_142012973	SE	ENSG00000113552,15	GNPDA1	chr5	0.639955	-0.228	0.000661519	-0.415	1	-0.187
GOLGA2P7_ 84204176_ 84204331_ 84202801_ 84203020_ 84204425_ 84204516	SE	ENSG00000225151,10	GOLGA2P7	chr15	0.0101267	0.415	0.320826	0.333	1	-0.082
GOLT1B_ 21506884_ 21506976_ 21501814_ 21501948_ 21512294_ 21512376	SE	ENSG00000111711,9	GOLT1B	chr12	0.120173	-0.148	0.00637801	-0.195	1	-0.048
GORAB_170536309_170536421_170532150_170532284_170539209_170539567	SE	ENSG00000120370,12	GORAB	chr1	0.0123648	0.237	0.0622192	0.228	1	-0.009
GPCPD1_ 5586193_ 5586269_ 5584280_ 5584322_ 5593326_ 5593411	SE	ENSG00000125772,12	GPCPD1	chr20	0.28827	0.175	0.651349	-0.079	0.0135135	-0.254
GPR155_174483009_174483158_174482872_174482918_174486872_174487000	SE	ENSG00000163328,13	GPR155	chr2	0.15048	-0.32	0.00122705	-0.419	1	-0.099
GPR161_168114455_168114549_168104476_168104894_168137164_168137583	SE	ENSG00000143147,14	GPR161	chr1	0.318744	0.157	0.042059	0.272	1	0.116
GRB10_ 50705139_ 50705323_ 50703820_ 50703908_ 50710874_ 50710990	SE	ENSG00000106070,18	GRB10	chr7	1	-0.039	0.0291687	-0.232	0.138619	-0.193
GRB10_ 50710874_ 50710990_ 50705139_ 50705323_ 50726012_ 50726035	SE	ENSG00000106070,18	GRB10	chr7	1	0.033	0.000650385	-0.314	0.000360291	-0.347
GRB10_ 50710874_ 50710990_ 50705139_ 50705323_ 50732271_ 50732368	SE	ENSG00000106070,18	GRB10	chr7	0.516479	0.222	0.16158	-0.162	0.000360291	-0.385
GRB10_ 50727792_ 50727890_ 50705139_ 50705323_ 50732271_ 50732368	SE	ENSG00000106070,18	GRB10	chr7	NA	NA	0.369049	-0.209	0.00238624	-0.497
GRB10_ 50732271_ 50732368_ 50674435_ 50674658_ 50755886_ 50755903	SE	ENSG00000106070,18	GRB10	chr7	0.0216092	-0.118	1	-0.023	0.0679895	0.094
GSN_121300055_121300126_121281469_121281562_121301962_121302149	SE	ENSG00000148180,19	GSN	chr9	0.448293	0.084	0.484045	-0.111	0.0183794	-0.195
GXYLT2_ 72955097_ 72955349_ 72922203_ 72922335_ 72957228_ 72957352	SE	ENSG00000172986,12	GXYLT2	chr3	0.00539214	0.316	0.0249308	0.154	1	-0.162
HAGLR_176179028_176179098_176177331_176177494_176188418_176188479	SE	ENSG00000224189,7	HAGLR	chr2	1	0.08	0.0301251	-0.439	1	-0.519
HARS2_140696028_140696201_140695737_140695845_140696520_140696614	SE	ENSG00000112855,15	HARS2	chr5	1	0.067	0.0197478	0.152	0.497348	0.085
HDAC7_ 47802223_ 47802274_ 47798784_ 47798972_ 47819766_ 47819785	SE	ENSG00000061273,17	HDAC7	chr12	1	-0.182	0.0143996	-0.399	0.102154	-0.217
HDHD5_ 17143097_ 17143131_ 17138549_ 17138738_ 17145023_ 17145117	SE	ENSG00000069998,12	HDHD5	chr22	0.144321	0.093	1	-0.022	0.00799535	-0.115
HEATR6_ 60073745_ 60073886_ 60073163_ 60073279_ 60076129_ 60076237	SE	ENSG00000068097,14	HEATR6	chr17	0.0493376	-0.175	0.0903004	-0.142	1	0.033
HEMK1_ 50572114_ 50572208_ 50571709_ 50571801_ 50577051_ 50577132	SE	ENSG00000114735,9	HEMK1	chr3	0.0979318	0.104	1	-0.004	0.0436419	-0.108
HERC3_ 88597949_ 88598087_ 88595556_ 88595614_ 88605794_ 88606049	SE	ENSG00000138641,16	HERC3	chr4	0.77468	0.04	0.7014	-0.172	0.044569	-0.212
HERC4_ 67940938_ 67941105_ 67936152_ 67936235_ 67954594_ 67954738	SE	ENSG00000148634,15	HERC4	chr10	NA	NA	0.00580385	0.14	0.00157917	0.151
HEXIM2_ 45162487_ 45162635_ 45161895_ 45161939_ 45162749_ 45162859	SE	ENSG00000168517,10	HEXIM2	chr17	0.456191	-0.214	0.00897217	-0.261	1	-0.047
HIVEP3_ 41579736_ 41585318_ 41518401_ 41518488_ 41628748_ 41628947	SE	ENSG00000127124,15	HIVEP3	chr1	2.41399e-07	-0.645	NA	NA	NA	NA
HIVEP3_ 41918412_ 41918524_ 41848870_ 41849089_ 42035806_ 42035925	SE	ENSG00000127124,15	HIVEP3	chr1	0.029094	-0.097	1	0.066	0.00217477	0.163
HOTAIRM1_ 27099097_ 27099366_ 27096123_ 27096388_ 27099778_ 27099966	SE	ENSG00000233429,9	HOTAIRM1	chr7	0.0434073	0.223	0.822361	0.106	0.599501	-0.116
HPS5_ 18317750_ 18317907_ 18311516_ 18312024_ 18322132_ 18322178	SE	ENSG00000110756,17	HPS5	chr11	0.0404927	0.406	1	0.074	0.159259	-0.332
HSF2BP_ 43592224_ 43592328_ 43529191_ 43529962_ 43630321_ 43630454	SE	ENSG00000160207,8	HSF2BP	chr21	NA	NA	0.000321159	0.567	0.000236381	0.567
HSF4_ 67167302_ 67167402_ 67167119_ 67167222_ 67167503_ 67167543	SE	ENSG00000102878,16	HSF4	chr16	0.509937	-0.024	0.0335567	-0.235	1	-0.21
HSF4_ 67167302_ 67167402_ 67167119_ 67167222_ 67167823_ 67167947	SE	ENSG00000102878,16	HSF4	chr16	1	0.08	0.0209826	0.579	0.0162184	0.499
HSF4_ 67167460_ 67167599_ 67167119_ 67167222_ 67167823_ 67167947	SE	ENSG00000102878,16	HSF4	chr16	1	0.01	0.0209826	0.169	0.00287882	0.16
HSF4_ 67167474_ 67167599_ 67167119_ 67167222_ 67167823_ 67167917	SE	ENSG00000102878,16	HSF4	chr16	1	0.004	0.00370166	0.117	0.00225939	0.113
IDI1_ 1043998_ 1044171_ 1043300_ 1043393_ 1048863_ 1049170	SE	ENSG00000067064,11	IDI1	chr10	1	-0.017	0.00107121	-0.12	0.0261503	-0.103
IFI44L_ 78628950_ 78628999_ 78620381_ 78620571_ 78635336_ 78635489	SE	ENSG00000137959,15	IFI44L	chr1	1	0.075	0.00449251	-0.322	0.00238624	-0.397
IGSF11_118949228_118949318_118930111_118930275_119034530_119034955	SE	ENSG00000144847,12	IGSF11	chr3	0.0370798	0.121	0.122059	0.09	1	-0.031
IKBKG_154560406_154560559_154558531_154558650_154561687_154561763	SE	ENSG00000269335,5	IKBKG	chrX	1	0.24	1	-0.227	0.00106607	-0.466
IKZF4_ 56023670_ 56023764_ 56018125_ 56018177_ 56025053_ 56025158	SE	ENSG00000123411,14	IKZF4	chr12	1	-0.276	NA	NA	0.0320394	0.276
IL13RA1_118746953_118747092_118741016_118741156_118749657_118749778	SE	ENSG00000131724,10	IL13RA1	chrX	0.00161703	-0.131	0.00137216	-0.131	NA	NA
IL17RC_ 9918334_ 9918409_ 9917863_ 9918075_ 9918499_ 9918598	SE	ENSG00000163702,19	IL17RC	chr3	0.65929	0.061	0.346313	-0.061	0.00395118	-0.123
IL17RC_ 9928579_ 9928630_ 9928304_ 9928486_ 9929848_ 9929897	SE	ENSG00000163702,19	IL17RC	chr3	0.0160458	0.191	1	-0.019	0.00531199	-0.209
INCENP_ 62141499_ 62141511_ 62140912_ 62141044_ 62144981_ 62145091	SE	ENSG00000149503,12	INCENP	chr11	0.047087	0.155	1	0.023	0.244304	-0.132
INO80E_ 30001413_ 30001530_ 30000928_ 30001040_ 30005367_ 30005435	SE	ENSG00000169592,14	INO80E	chr16	0.0344098	-0.104	0.0317102	-0.112	1	-0.008
INO80E_ 30004567_ 30004657_ 30001211_ 30001530_ 30005367_ 30005435	SE	ENSG00000169592,14	INO80E	chr16	1	0.156	0.0249308	0.461	0.150833	0.305
INPP5K_ 1515887_ 1516118_ 1515426_ 1515585_ 1516455_ 1516612	SE	ENSG00000132376,19	INPP5K	chr17	0.0128127	0.447	1	0.333	0.0816623	-0.114
INSYN2_127176876_127177139_127175211_127176400_127195996_127196158	SE	ENSG00000188916,8	INSYN2	chr10	0.019083	-0.222	1	-0.08	0.563851	0.142
INVS_100214924_100215040_100126382_100126549_100215400_100215488	SE	ENSG00000119509,12	INVS	chr9	0.506642	-0.361	0.00529701	-0.649	0.0845946	-0.288
IQCB1_121828469_121828632_121826050_121826180_121828860_121828972	SE	ENSG00000173226,16	IQCB1	chr3	0.0666711	-0.194	0.0308871	-0.193	1	0.001
IQCD_113197540_113197612_113195442_113195889_113207437_113208259	SE	ENSG00000166578,9	IQCD	chr12	1	0.507	1	-0.236	0.000317541	-0.742
IQCD_113207437_113208259_113200579_113200813_113220996_113221094	SE	ENSG00000166578,9	IQCD	chr12	0.046218	-0.349	1	-0.035	0.0392506	0.314
IQCH_ 67400113_ 67400305_ 67388830_ 67389006_ 67416930_ 67417051	SE	ENSG00000103599,19	IQCH	chr15	0.0466376	0.367	1	0.178	1	-0.189
IQCK_ 19735352_ 19735450_ 19733697_ 19733827_ 19788837_ 19788922	SE	ENSG00000174628,16	IQCK	chr16	0.0258008	-0.163	0.264377	-0.165	1	-0.002
IQCK_ 19763847_ 19764112_ 19733697_ 19733827_ 19788837_ 19788922	SE	ENSG00000174628,16	IQCK	chr16	0.0475057	-0.301	1	-0.05	0.274634	0.251
IQSEC2_ 53279563_ 53279776_ 53266641_ 53267064_ 53281495_ 53281581	SE	ENSG00000124313,14	IQSEC2	chrX	0.279334	-0.146	1	0.032	0.015932	0.178
ITCH_ 34393769_ 34393881_ 34369393_ 34369470_ 34408650_ 34408792	SE	ENSG00000078747,14	ITCH	chr20	0.0223829	-0.114	0.0178268	-0.128	1	-0.014
ITGA10_145906732_145906824_145904683_145904811_145907040_145907150	SE	ENSG00000143127,12	ITGA10	chr1	0.0534731	0.086	1	-0.019	0.0458229	-0.106
ITGA7_ 55701133_ 55701154_ 55700671_ 55700971_ 55702871_ 55702951	SE	ENSG00000135424,16	ITGA7	chr12	0.0307228	0.312	NA	NA	0.0252311	-0.312
ITGA9-AS1_ 37818679_ 37818930_ 37808495_ 37808880_ 37821013_ 37821100	SE	ENSG00000235257,8	ITGA9-AS1	chr3	0.0921778	0.342	1	-0.054	0.0092621	-0.395
ITGA9-AS1_ 37818809_ 37818930_ 37808494_ 37808880_ 37821013_ 37821100	SE	ENSG00000235257,8	ITGA9-AS1	chr3	0.099581	0.257	1	-0.048	0.00869515	-0.305
JAKMIP2_147671677_147671954_147660947_147661445_147782455_147782542	SE	ENSG00000176049,15	JAKMIP2	chr5	0.0114073	-0.157	1	0.014	0.0710068	0.171
JAKMIP3_132163208_132163412_132153912_132153990_132164669_132164735	SE	ENSG00000188385,11	JAKMIP3	chr10	0.0374748	0.577	NA	NA	1	-0.577
JHY_122924896_122925010_122903924_122904444_122946497_122946792	SE	ENSG00000109944,10	JHY	chr11	0.0214015	0.469	NA	NA	1	-0.469
JHY_122934419_122935075_122924896_122925010_122946497_122946792	SE	ENSG00000109944,10	JHY	chr11	0.0136625	0.486	NA	NA	1	-0.486
JKAMP_ 59484989_ 59485116_ 59484442_ 59484593_ 59487673_ 59487828	SE	ENSG00000050130,17	JKAMP	chr14	0.284138	-0.152	NA	NA	0.00258653	0.341
JMJD8_ 684065_ 684155_ 683860_ 683909_ 684233_ 684334	SE	ENSG00000161999,11	JMJD8	chr16	1	0.036	0.0135759	0.106	0.329782	0.07
JPX_ 73994839_ 73994961_ 73946998_ 73947374_ 73998767_ 73998844	SE	ENSG00000225470,7	JPX	chrX	1	-0.181	0.885515	-0.024	0.0311415	0.157
JPX_ 73998767_ 73998844_ 73944583_ 73944662_ 74004269_ 74004351	SE	ENSG00000225470,7	JPX	chrX	1	0.003	0.0212296	0.319	0.00222927	0.316
KANTR_ 53094399_ 53094474_ 53094144_ 53094284_ 53099471_ 53099608	SE	ENSG00000232593,7	KANTR	chrX	1	0.622	2.44071e-05	0.61	0.973447	-0.012
KCNAB3_ 7923455_ 7923544_ 7921858_ 7923179_ 7923710_ 7923831	SE	ENSG00000170049,9	KCNAB3	chr17	0.0152856	-0.26	0.060793	-0.208	1	0.052
KCNJ10_160042045_160042532_159998840_159999494_160070021_160070119	SE	ENSG00000177807,9	KCNJ10	chr1	0.0404927	-0.191	0.000115995	-0.277	1	-0.086
KCTD15_ 33798263_ 33798390_ 33796845_ 33796987_ 33798670_ 33798766	SE	ENSG00000153885,14	KCTD15	chr19	1	-0.049	0.0104505	0.195	0.0195822	0.244
KCTD17_ 37060822_ 37060922_ 37059312_ 37059438_ 37061538_ 37061564	SE	ENSG00000100379,17	KCTD17	chr22	0.102679	-0.103	0.00149714	-0.13	1	-0.027
KCTD17_ 37061103_ 37061175_ 37059312_ 37059438_ 37061538_ 37061629	SE	ENSG00000100379,17	KCTD17	chr22	1	-0.156	0.00251567	-0.618	NA	NA
KCTD20_ 36451533_ 36451632_ 36443417_ 36443530_ 36470051_ 36470257	SE	ENSG00000112078,13	KCTD20	chr6	1	0.428	NA	NA	0.03198	-0.451
KCTD9_ 25446079_ 25446250_ 25440576_ 25440673_ 25458198_ 25458476	SE	ENSG00000104756,15	KCTD9	chr8	0.00472892	-0.5	0.0265804	-0.448	1	0.053
KCTD9_ 25446128_ 25446250_ 25440576_ 25440673_ 25458198_ 25458387	SE	ENSG00000104756,15	KCTD9	chr8	0.00290509	-0.485	0.0203935	-0.433	1	0.052
KDM1B_ 18185771_ 18185810_ 18171362_ 18171479_ 18197056_ 18197233	SE	ENSG00000165097,14	KDM1B	chr6	0.0172211	0.353	1	-0.04	0.00172897	-0.393
KDM4C_ 7105401_ 7105500_ 7103684_ 7103870_ 7128065_ 7128236	SE	ENSG00000107077,18	KDM4C	chr9	0.72658	0.227	0.0309845	0.278	1	0.05
KDM5B_202766925_202767051_202764048_202764145_202773117_202773288	SE	ENSG00000117139,17	KDM5B	chr1	0.144147	-0.103	0.000244338	-0.161	1	-0.058
KDM6A_ 45060021_ 45060156_ 45059246_ 45059466_ 45061323_ 45061419	SE	ENSG00000147050,14	KDM6A	chrX	1	0.09	1	-0.183	0.000838478	-0.273
KDM6A_ 45060608_ 45060764_ 45059246_ 45059466_ 45061323_ 45061419	SE	ENSG00000147050,14	KDM6A	chrX	1	0.119	0.8761	-0.19	0.000454991	-0.308
KIAA0556_ 27654607_ 27654736_ 27631064_ 27631162_ 27677728_ 27677818	SE	ENSG00000047578,12	KIAA0556	chr16	0.00286857	0.514	NA	NA	0.0427965	-0.352
KIAA0895_ 36336153_ 36336297_ 36335045_ 36335178_ 36356901_ 36357590	SE	ENSG00000164542,12	KIAA0895	chr7	0.94032	0.16	0.442231	-0.257	0.0458831	-0.417
KIAA1109_122325854_122325917_122325229_122325320_122328103_122328357	SE	ENSG00000138688,15	KIAA1109	chr4	0.0201275	0.13	1	0.038	0.268319	-0.092
KIAA1328_ 37084124_ 37084232_ 37066889_ 37067545_ 37160199_ 37160381	SE	ENSG00000150477,14	KIAA1328	chr18	1	0.078	0.000584948	0.416	1	0.339
KIAA1551_ 31980877_ 31985957_ 31970188_ 31970356_ 31992377_ 31993107	SE	ENSG00000174718,11	KIAA1551	chr12	0.101159	0.235	0.0397382	0.281	NA	NA
KIAA1755_ 38225664_ 38225781_ 38223537_ 38223636_ 38227153_ 38227240	SE	ENSG00000149633,11	KIAA1755	chr20	0.0175856	-0.245	1	-0.083	0.0171791	0.161
KIF21A_ 39315931_ 39315970_ 39311416_ 39311553_ 39318072_ 39318201	SE	ENSG00000139116,18	KIF21A	chr12	1	-0.084	0.381151	0.262	0.0203403	0.347
KIF21A_ 39315931_ 39315970_ 39311416_ 39311553_ 39319905_ 39320013	SE	ENSG00000139116,18	KIF21A	chr12	1	0.067	0.0262155	0.111	0.186901	0.043
KIF21B_200983055_200983094_200980959_200981096_200984858_200984972	SE	ENSG00000116852,14	KIF21B	chr1	1	0.399	0.0747667	-0.19	0.000475259	-0.589
KIF27_ 83870518_ 83870632_ 83859155_ 83859371_ 83880296_ 83880494	SE	ENSG00000165115,14	KIF27	chr9	0.00655771	-0.387	1	-0.387	NA	NA
KIF27_ 83880296_ 83880494_ 83870518_ 83870632_ 83883812_ 83884018	SE	ENSG00000165115,14	KIF27	chr9	0.0508515	0.232	1	-0.123	0.000410057	-0.356
KIF3A_132700215_132700284_132699170_132699295_132700646_132700700	SE	ENSG00000131437,15	KIF3A	chr5	0.763927	0.077	1	-0.044	0.0219008	-0.122
KIN_ 7774830_ 7774891_ 7769215_ 7769345_ 7778837_ 7779019	SE	ENSG00000151657,11	KIN	chr10	0.111409	-0.132	0.00276494	-0.216	NA	NA
KLHDC1_ 49709708_ 49709826_ 49709158_ 49709229_ 49710262_ 49710381	SE	ENSG00000197776,7	KLHDC1	chr14	1	0.438	NA	NA	9.6872e-05	-0.438
KLHDC4_ 87755193_ 87755292_ 87730551_ 87730644_ 87761948_ 87762040	SE	ENSG00000104731,13	KLHDC4	chr16	1	0.058	0.641157	-0.262	0.0138856	-0.32
KLHL17_ 961292_ 961552_ 960586_ 960800_ 961628_ 961750	SE	ENSG00000187961,13	KLHL17	chr1	0.0196436	-0.242	0.0196673	-0.242	NA	NA
KLHL20_173715522_173715654_173714940_173715078_173716002_173716066	SE	ENSG00000076321,10	KLHL20	chr1	0.314154	-0.221	0.907631	0.073	0.00967281	0.294
KLRC4-KLRK1_ 10391834_ 10391891_ 10388770_ 10388875_ 10405849_ 10405950	SE	ENSG00000255819,7	KLRC4-KLRK1	chr12	0.150387	0.231	0.215588	-0.262	0.0415	-0.492
KLRG1_ 8995118_ 8995288_ 8992069_ 8992310_ 9008974_ 9009075	SE	ENSG00000139187,9	KLRG1	chr12	1	-0.91	0.0340266	-0.704	1	0.206
KMT5A_123389432_123389554_123383772_123384208_123390629_123390786	SE	ENSG00000183955,12	KMT5A	chr12	0.0746513	0.154	0.0472279	0.216	1	0.062
KNL1_ 40620639_ 40625640_ 40618958_ 40619011_ 40628069_ 40628208	SE	ENSG00000137812,19	KNL1	chr15	0.0659475	-0.421	1.09651e-06	-0.633	1	-0.212
KNTC1_122529990_122530192_122527247_122527351_122534663_122534784	SE	ENSG00000184445,11	KNTC1	chr12	0.878228	0.06	0.878461	-0.072	0.00563955	-0.132
KRBA1_149715238_149715349_149714780_149715066_149719545_149719672	SE	ENSG00000133619,17	KRBA1	chr7	0.157054	0.388	0.968128	-0.328	0.00601644	-0.716
KRBOX4_ 46471141_ 46471185_ 46463197_ 46463293_ 46472752_ 46473594	SE	ENSG00000147121,15	KRBOX4	chrX	0.00551463	0.437	1	0.307	1	-0.13
KRBOX4_ 46471141_ 46471185_ 46463197_ 46463308_ 46472749_ 46474639	SE	ENSG00000147121,15	KRBOX4	chrX	0.53669	0.16	0.00895366	0.332	1	0.172
KRIT1_ 92244901_ 92245171_ 92242033_ 92242137_ 92245789_ 92245914	SE	ENSG00000001631,15	KRIT1	chr7	1	0.11	0.089104	-0.125	0.0335228	-0.235
KSR1_ 27601359_ 27601401_ 27597267_ 27597436_ 27603833_ 27603888	SE	ENSG00000141068,14	KSR1	chr17	0.0132417	0.265	1	0.166	0.708746	-0.099
KTN1_ 55663954_ 55664041_ 55661273_ 55661612_ 55667240_ 55667330	SE	ENSG00000126777,17	KTN1	chr14	0.635043	0.061	0.0472026	0.126	0.711068	0.066
KYAT1_128846679_128846859_128845352_128845411_128882406_128882494	SE	ENSG00000171097,13	KYAT1	chr9	NA	NA	0.00390777	-0.388	0.00349864	-0.457
L3HYPDH_ 59474438_ 59474526_ 59472860_ 59473090_ 59474727_ 59475208	SE	ENSG00000126790,11	L3HYPDH	chr14	2.42622e-07	-0.712	1	-0.21	3.55572e-05	0.502
L3MBTL2_ 41213850_ 41214026_ 41209695_ 41209933_ 41216138_ 41216262	SE	ENSG00000100395,14	L3MBTL2	chr22	0.0299036	0.127	0.953587	0.08	1	-0.048
LAMTOR5-AS1_110413320_110413410_110412172_110412293_110416008_110416186	SE	ENSG00000224699,8	LAMTOR5-AS1	chr1	1	0.295	1	-0.092	0.049203	-0.387
LAMTOR5-AS1_110414151_110414231_110412172_110412293_110416008_110416089	SE	ENSG00000224699,8	LAMTOR5-AS1	chr1	1	0.464	1	-0.106	0.00586491	-0.57
LARP4_ 50402674_ 50402813_ 50400888_ 50401028_ 50412404_ 50412453	SE	ENSG00000161813,21	LARP4	chr12	1	0.021	0.0335567	-0.233	0.0128449	-0.254
LCLAT1_ 30562145_ 30562292_ 30533115_ 30533314_ 30568059_ 30568176	SE	ENSG00000172954,13	LCLAT1	chr2	1	0.013	0.00988341	0.177	0.0262072	0.164
LCOR_ 96944112_ 96944245_ 96907667_ 96907747_ 96949007_ 96949295	SE	ENSG00000196233,13	LCOR	chr10	0.00791365	0.187	0.0190774	0.17	1	-0.018
LCTL_ 66563910_ 66563998_ 66561186_ 66561315_ 66565856_ 66565964	SE	ENSG00000188501,11	LCTL	chr15	1	-0.155	NA	NA	4.86981e-08	0.684
LDAH_ 20790254_ 20790398_ 20774809_ 20774979_ 20801309_ 20801465	SE	ENSG00000118961,14	LDAH	chr2	1	-0.07	0.0205897	-0.129	0.174502	-0.059
LETMD1_ 51058005_ 51058128_ 51056349_ 51056502_ 51059360_ 51060363	SE	ENSG00000050426,15	LETMD1	chr12	1	-0.032	0.755563	0.131	0.0164805	0.163
LETMD1_ 51058074_ 51058128_ 51056370_ 51056502_ 51059360_ 51059649	SE	ENSG00000050426,15	LETMD1	chr12	1	-0.05	0.92069	0.189	0.00585073	0.239
LIAS_ 39467517_ 39467646_ 39465284_ 39465342_ 39470018_ 39470164	SE	ENSG00000121897,14	LIAS	chr4	0.0211167	0.267	0.0211044	0.277	1	0.01
LIG1_ 48120166_ 48121322_ 48119136_ 48119190_ 48122933_ 48123016	SE	ENSG00000105486,13	LIG1	chr19	1	-0.048	0.414059	0.084	0.0150661	0.132
LIN54_ 82946257_ 82946474_ 82939888_ 82939962_ 82978882_ 82979006	SE	ENSG00000189308,10	LIN54	chr4	0.799354	0.112	NA	NA	0.0397767	-0.299
LIN54_ 82970326_ 82970469_ 82939888_ 82939962_ 82978882_ 82979006	SE	ENSG00000189308,10	LIN54	chr4	1	0.055	1	-0.086	0.0270555	-0.141
LINC00174_ 66439134_ 66439304_ 66427948_ 66428040_ 66450070_ 66450236	SE	ENSG00000179406,7	LINC00174	chr7	1	0.023	1	-0.516	0.0339512	-0.539
LINC00174_ 66467681_ 66467719_ 66450070_ 66450236_ 66476258_ 66476327	SE	ENSG00000179406,7	LINC00174	chr7	1	-0.231	1	0.58	0.000360291	0.81
LINC00680_ 57949858_ 57950011_ 57948872_ 57949068_ 57959027_ 57959111	SE	ENSG00000215190,9	LINC00680	chr6	1	0.041	0.00221886	-0.438	0.000360291	-0.478
LINC01128_ 849483_ 849602_ 847653_ 847806_ 851926_ 851987	SE	ENSG00000228794,8	LINC01128	chr1	1	-0.112	0.47071	0.173	0.0251509	0.284
LINC01184_128061143_128061244_127956803_127956921_128082734_128083100	SE	ENSG00000245937,7	LINC01184	chr5	1	-0.029	1	0.078	0.0272757	0.106
LINC01184_128061143_128061244_127965887_127966928_128082969_128083028	SE	ENSG00000245937,7	LINC01184	chr5	NA	NA	0.0571338	0.107	0.0498761	0.107
LINC01184_128081972_128082194_128076946_128077093_128082734_128082960	SE	ENSG00000245937,7	LINC01184	chr5	1	0.5	5.67138e-09	0.826	1	0.326
LINC01301_ 60408354_ 60408497_ 60403211_ 60405249_ 60413555_ 60413818	SE	ENSG00000251396,6	LINC01301	chr8	0.021233	-0.643	1	-0.077	0.0304946	0.566
LINC01778_ 30826130_ 30826194_ 30824297_ 30824373_ 30829747_ 30829882	SE	ENSG00000223382,4	LINC01778	chr1	1	0.597	0.0422813	0.634	1	0.037
LINC01881_242114638_242114741_242094886_242095027_242118964_242119057	SE	ENSG00000220804,8	LINC01881	chr2	0.0487838	0.379	NA	NA	0.0399817	-0.379
LINC01881_242116182_242116232_242114638_242114741_242118964_242119057	SE	ENSG00000220804,8	LINC01881	chr2	0.799334	0.407	1	-0.033	0.00454031	-0.441
LIPE_ 42406160_ 42406388_ 42405384_ 42405561_ 42407173_ 42407468	SE	ENSG00000079435,9	LIPE	chr19	1	0.183	0.72485	-0.218	0.00012079	-0.401
LIPT1_ 99156300_ 99156426_ 99154954_ 99155051_ 99161956_ 99162275	SE	ENSG00000144182,16	LIPT1	chr2	0.0115822	-0.592	1	-0.09	0.0736948	0.502
LMBR1_156688029_156688191_156677790_156684163_156724111_156724178	SE	ENSG00000105983,20	LMBR1	chr7	0.199766	0.094	1	-0.039	0.00932552	-0.133
LNPK_175994133_175994280_175992230_175992273_175995557_175995646	SE	ENSG00000144320,13	LNPK	chr2	NA	NA	0.00149714	-0.539	1	0
LPAR4_ 78748962_ 78749230_ 78747708_ 78748034_ 78750173_ 78750223	SE	ENSG00000147145,12	LPAR4	chrX	1	-0.225	0.00688101	0.178	0.0208044	0.403
LRCH3_197858833_197858905_197852327_197852620_197865422_197865471	SE	ENSG00000186001,13	LRCH3	chr3	0.0682838	0.142	1	-0.035	0.00336405	-0.178
LRRC23_ 6909889_ 6910026_ 6907314_ 6907445_ 6913890_ 6914228	SE	ENSG00000010626,14	LRRC23	chr12	0.0319643	0.358	1	-0.081	0.000239983	-0.439
LRRC23_ 6912729_ 6913027_ 6907314_ 6907445_ 6913890_ 6914194	SE	ENSG00000010626,14	LRRC23	chr12	0.229487	0.313	0.777533	-0.179	4.11335e-05	-0.492
LRRC37B_ 32017971_ 32018054_ 32007987_ 32008132_ 32020696_ 32020803	SE	ENSG00000185158,12	LRRC37B	chr17	0.011132	0.365	1	-0.056	0.00517941	-0.421
LRRC49_ 70900921_ 70901024_ 70895848_ 70895936_ 70904551_ 70904596	SE	ENSG00000137821,11	LRRC49	chr15	1	0.036	0.0423752	-0.119	0.0323328	-0.155
LRRCC1_ 85115374_ 85115584_ 85115099_ 85115275_ 85123412_ 85123606	SE	ENSG00000133739,15	LRRCC1	chr8	0.00339818	0.191	1	0.017	0.00629463	-0.174
LRRCC1_ 85123412_ 85123606_ 85115374_ 85115584_ 85124791_ 85124939	SE	ENSG00000133739,15	LRRCC1	chr8	0.00147822	-0.244	5.56394e-05	-0.273	1	-0.029
LRRFIP1_237751199_237751271_237749198_237749324_237753308_237753479	SE	ENSG00000124831,18	LRRFIP1	chr2	0.966502	0.073	0.688121	-0.126	0.042884	-0.198
LRRFIP1_237757455_237757548_237756094_237756187_237758728_237758821	SE	ENSG00000124831,18	LRRFIP1	chr2	0.00838816	-0.402	1	-0.16	0.168068	0.242
LRTOMT_ 72089028_ 72089165_ 72088296_ 72088380_ 72093495_ 72093701	SE	ENSG00000184154,14	LRTOMT	chr11	0.0954794	0.134	1	-0.005	0.00875563	-0.138
LTN1_ 28965864_ 28965906_ 28960516_ 28960706_ 28966369_ 28967179	SE	ENSG00000198862,13	LTN1	chr21	0.00137732	0.123	1	0.06	0.0852918	-0.063
LUC7L_ 228332_ 228402_ 227241_ 227336_ 229278_ 229374	SE	ENSG00000007392,16	LUC7L	chr16	0.0395018	0.123	0.922285	0.075	1	-0.048
LUC7L3_ 50749223_ 50749344_ 50746541_ 50746702_ 50750746_ 50751013	SE	ENSG00000108848,15	LUC7L3	chr17	1	0.037	0.0494494	-0.312	0.0149948	-0.349
LYPD6_149449048_149449147_149437637_149437826_149468644_149468775	SE	ENSG00000187123,14	LYPD6	chr2	1	-0.036	0.191401	0.167	0.0442931	0.203
LYRM1_ 20915555_ 20915714_ 20900234_ 20900535_ 20920121_ 20920214	SE	ENSG00000102897,9	LYRM1	chr16	0.0085522	-0.116	0.265268	-0.085	1	0.032
LYRM9_ 27880120_ 27880183_ 27879050_ 27879490_ 27880273_ 27880366	SE	ENSG00000232859,9	LYRM9	chr17	1	-0.161	0.0146157	-0.159	1	0.002
LZTFL1_ 45837926_ 45838047_ 45835589_ 45835784_ 45841988_ 45842116	SE	ENSG00000163818,16	LZTFL1	chr3	1	-0.035	0.0375888	-0.248	0.0482345	-0.213
LZTFL1_ 45837926_ 45838051_ 45834237_ 45835784_ 45841988_ 45842136	SE	ENSG00000163818,16	LZTFL1	chr3	1	-0.07	0.00919555	-0.193	0.0620698	-0.123
MACF1_ 39436481_ 39436490_ 39435557_ 39435761_ 39437776_ 39438008	SE	ENSG00000127603,25	MACF1	chr1	1	0.023	0.00304554	0.153	0.0125204	0.13
MAMDC4_136858718_136858853_136858399_136858546_136859208_136859317	SE	ENSG00000177943,13	MAMDC4	chr9	0.19807	0.151	1	-0.057	0.00861833	-0.209
MAMDC4_136858718_136859132_136857978_136858546_136859208_136860064	SE	ENSG00000177943,13	MAMDC4	chr9	0.124585	0.182	1	-0.066	0.00201666	-0.247
MAMDC4_136859004_136859132_136858399_136858546_136859208_136859317	SE	ENSG00000177943,13	MAMDC4	chr9	NA	NA	1	-0.07	0.00109022	-0.303
MAN2A2_ 90903230_ 90903734_ 90902925_ 90902975_ 90904189_ 90904339	SE	ENSG00000196547,14	MAN2A2	chr15	0.000249211	-0.526	1	0.123	6.32081e-06	0.648
MAP2_209696541_209696748_209692624_209696350_209700276_209700338	SE	ENSG00000078018,19	MAP2	chr2	1	-0.092	0.0408968	-0.157	0.802843	-0.065
MAP2_209723594_209723687_209709913_209710254_209725708_209725790	SE	ENSG00000078018,19	MAP2	chr2	1	-0.001	0.0335912	-0.107	0.0298866	-0.106
MAP3K15_ 19414259_ 19414332_ 19413356_ 19413464_ 19415106_ 19415257	SE	ENSG00000180815,14	MAP3K15	chrX	0.00110907	0.23	1	-0.019	0.000365045	-0.248
MAP3K3_ 63634708_ 63634801_ 63632680_ 63632802_ 63646033_ 63646074	SE	ENSG00000198909,7	MAP3K3	chr17	0.234386	0.218	0.0430482	0.238	1	0.02
MAP4_ 47915950_ 47917174_ 47877416_ 47877523_ 47921764_ 47921878	SE	ENSG00000047849,21	MAP4	chr3	0.0190953	-0.428	0.404798	-0.305	NA	NA
MAP4K4_101863820_101864051_101855976_101856138_101864929_101865003	SE	ENSG00000071054,16	MAP4K4	chr2	0.737943	0.115	1	-0.097	0.0105845	-0.212
MAPK10_ 86453029_ 86453181_ 86354529_ 86354644_ 86593909_ 86594062	SE	ENSG00000109339,21	MAPK10	chr4	0.00579849	0.241	1	-0.172	0.0601973	-0.413
MAPK12_ 50248661_ 50248751_ 50248365_ 50248472_ 50249102_ 50249454	SE	ENSG00000188130,13	MAPK12	chr22	NA	NA	0.059999	0.171	0.0320394	0.191
MARK1_220657789_220657834_220653097_220653352_220661811_220662458	SE	ENSG00000116141,15	MARK1	chr1	1	-0.035	0.00910644	-0.241	0.106828	-0.206
MASP1_187241480_187241555_187234081_187236567_187243483_187243585	SE	ENSG00000127241,16	MASP1	chr3	1	0.04	0.0298864	-0.116	0.0140089	-0.156
MAST4_ 66963706_ 66963787_ 66958869_ 66959294_ 67054403_ 67054492	SE	ENSG00000069020,18	MAST4	chr5	0.0395018	-0.257	0.0366707	-0.257	1	0
MATR3_139279934_139280058_139279050_139279129_139293452_139293575	SE	ENSG00000280987,4	MATR3	chr5	0.000393727	-0.333	0.89952	-0.089	NA	NA
MATR3_139293452_139293575_139279050_139279129_139307238_139308327	SE	ENSG00000280987,4	MATR3	chr5	0.00203125	0.256	0.81286	0.204	0.0330998	-0.051
MBD1_ 50271468_ 50271540_ 50268840_ 50269818_ 50272676_ 50272738	SE	ENSG00000141644,17	MBD1	chr18	0.0380823	0.274	1	0.046	0.0965839	-0.228
MBD5_148054390_148054449_148021392_148021684_148178699_148178793	SE	ENSG00000204406,13	MBD5	chr2	0.0121504	0.196	1	0.086	0.616375	-0.109
MCCC1_183092408_183092545_183086692_183086788_183094558_183094605	SE	ENSG00000078070,12	MCCC1	chr3	0.254481	0.184	0.0123097	-0.13	1.16872e-05	-0.315
MCM3AP-AS1_ 46236223_ 46236326_ 46229272_ 46229363_ 46240833_ 46242999	SE	ENSG00000215424,9	MCM3AP-AS1	chr21	1	0.234	0.0145875	0.402	NA	NA
MCTP1_ 94917895_ 94917973_ 94912805_ 94912976_ 94923961_ 94924021	SE	ENSG00000175471,19	MCTP1	chr5	0.0915509	-0.104	1	0.137	0.0274162	0.241
MCTP1_ 94923961_ 94924021_ 94912805_ 94912976_ 94931952_ 94931991	SE	ENSG00000175471,19	MCTP1	chr5	0.0452746	0.087	1	-0.045	0.0371833	-0.131
MDH1B_206760900_206761013_206757236_206757371_206765249_206765286	SE	ENSG00000138400,12	MDH1B	chr2	0.0262741	0.385	0.0279169	0.425	1	0.04
MDM1_ 68321346_ 68321446_ 68314947_ 68315265_ 68321524_ 68321628	SE	ENSG00000111554,14	MDM1	chr12	0.00469531	0.226	NA	NA	0.00295069	-0.226
MDM4_204544534_204544684_204542783_204542944_204546796_204546832	SE	ENSG00000198625,12	MDM4	chr1	0.0122568	0.112	0.0275978	0.11	1	-0.002
MED12L_151409242_151409332_151394655_151394867_151411277_151411507	SE	ENSG00000144893,12	MED12L	chr3	9.62402e-06	-0.505	1	-0.441	1	0.064
MEF2A_ 99598429_ 99598511_ 99565699_ 99566104_ 99632977_ 99633173	SE	ENSG00000068305,17	MEF2A	chr15	0.7897	-0.106	0.0138583	-0.21	0.441203	-0.104
MEG3_100831420_100831534_100831015_100831094_100835738_100835879	SE	ENSG00000214548,16	MEG3	chr14	1	0.664	0.000239952	0.518	1	-0.146
MEG8_100977604_100977722_100975410_100975496_100980576_100980663	SE	ENSG00000225746,11	MEG8	chr14	0.0185829	0.123	1	0.065	1	-0.058
METTL16_ 2467760_ 2467876_ 2464207_ 2464350_ 2473523_ 2473664	SE	ENSG00000127804,12	METTL16	chr17	1	0.029	0.0113744	-0.089	7.17324e-05	-0.118
METTL21A_207620640_207620694_207581694_207582160_207621805_207621917	SE	ENSG00000144401,14	METTL21A	chr2	0.00707472	0.197	1	0.092	NA	NA
METTL22_ 8644528_ 8644725_ 8642462_ 8642565_ 8646107_ 8646218	SE	ENSG00000067365,14	METTL22	chr16	1	-0.079	0.000115995	-0.407	1	-0.328
METTL22_ 8644556_ 8644725_ 8642462_ 8642565_ 8646107_ 8646191	SE	ENSG00000067365,14	METTL22	chr16	0.382115	-0.123	0.00276494	-0.216	1	-0.094
METTL23_ 76726969_ 76727178_ 76726850_ 76726879_ 76732977_ 76733215	SE	ENSG00000181038,13	METTL23	chr17	3.43201e-05	-0.34	0.0973727	-0.21	1	0.13
METTL23_ 76729689_ 76729794_ 76726829_ 76726879_ 76732977_ 76733215	SE	ENSG00000181038,13	METTL23	chr17	0.000165862	-0.281	0.00686774	-0.211	1	0.071
MFF_227347225_227347384_227342744_227342819_227355676_227355761	SE	ENSG00000168958,19	MFF	chr2	0.103875	0.27	1	0.008	0.0092621	-0.263
MFSD13A_102465981_102466087_102461394_102461450_102468954_102469197	SE	ENSG00000138111,14	MFSD13A	chr10	0.934314	-0.115	1	0.264	0.00162036	0.379
MFSD9_102732023_102732138_102731024_102731068_102732321_102732392	SE	ENSG00000135953,10	MFSD9	chr2	0.486547	-0.066	0.0395353	-0.213	1	-0.146
MGAT5B_ 76904251_ 76904422_ 76903302_ 76903376_ 76905168_ 76905333	SE	ENSG00000167889,12	MGAT5B	chr17	1	-0.039	0.398217	0.15	0.0343094	0.189
MGLL_127710575_127710665_127694974_127695190_127721052_127721163	SE	ENSG00000074416,14	MGLL	chr3	0.0197964	-0.264	0.159321	-0.2	1	0.063
MIATNB_ 26717252_ 26717459_ 26672804_ 26672987_ 26726643_ 26726794	SE	ENSG00000244625,5	MIATNB	chr22	0.000582493	-0.506	0.0811348	-0.347	1	0.159
MICAL1_109447874_109447963_109447680_109447722_109448202_109448393	SE	ENSG00000135596,17	MICAL1	chr6	0.00331082	-0.187	0.157755	-0.15	1	0.037
MICAL1_109450299_109450557_109449969_109450085_109451599_109451700	SE	ENSG00000135596,17	MICAL1	chr6	0.0374671	-0.158	1	-0.072	0.172163	0.086
MINDY1_151002164_151002706_151001724_151001782_151006311_151006871	SE	ENSG00000143409,15	MINDY1	chr1	1	0.068	0.0402635	0.248	0.482494	0.179
MINDY1_151002164_151002968_151001724_151001782_151006311_151006404	SE	ENSG00000143409,15	MINDY1	chr1	1	0.086	0.00910644	0.319	0.541829	0.233
MIR100HG_122064179_122066434_122033313_122033462_122100373_122100475	SE	ENSG00000255248,8	MIR100HG	chr11	3.31749e-05	-0.615	1	-0.615	NA	NA
MIR100HG_122155550_122155632_122091628_122091740_122180335_122180398	SE	ENSG00000255248,8	MIR100HG	chr11	0.0101267	0.218	1	0.164	1	-0.054
MIR100HG_122189453_122189525_122180335_122180398_122202763_122203062	SE	ENSG00000255248,8	MIR100HG	chr11	0.0434794	-0.171	NA	NA	0.0349408	0.171
MIR4435-2HG_111365560_111367575_111344060_111344237_111494884_111495120	SE	ENSG00000172965,15	MIR4435-2HG	chr2	0.00158662	-0.334	0.229278	-0.147	1	0.187
MIR762HG_ 30888713_ 30888958_ 30875911_ 30876118_ 30894547_ 30895220	SE	ENSG00000260083,1	MIR762HG	chr16	0.0879856	0.23	1	0.111	0.0270301	-0.118
MLF1_158588851_158588924_158571172_158571391_158592433_158592581	SE	ENSG00000178053,17	MLF1	chr3	0.0153392	0.271	1	0.098	0.0541511	-0.173
MLF1_158592433_158592581_158571163_158571391_158596861_158596945	SE	ENSG00000178053,17	MLF1	chr3	1	-0.041	0.0609574	0.08	0.00967281	0.121
MMAA_145651127_145651147_145645985_145646156_145653993_145654143	SE	ENSG00000151611,14	MMAA	chr4	0.00311812	0.667	NA	NA	0.00208665	-0.667
MPI_ 74897010_ 74897219_ 74896151_ 74896325_ 74897511_ 74898044	SE	ENSG00000178802,17	MPI	chr15	0.00864556	0.204	0.201317	0.088	0.50139	-0.115
MPP2_ 43904429_ 43904493_ 43898226_ 43898380_ 43907473_ 43907526	SE	ENSG00000108852,14	MPP2	chr17	1	-0.054	0.0571338	0.361	0.0470773	0.415
MROH1_144242601_144242628_144242368_144242515_144243493_144243616	SE	ENSG00000179832,17	MROH1	chr8	1	-0.145	0.0172048	-0.286	1	-0.141
MRPL55_228108954_228109021_228108234_228108318_228109148_228109299	SE	ENSG00000162910,18	MRPL55	chr1	0.0328997	0.254	1	0.03	0.0302947	-0.224
MRPS15_ 36461263_ 36461312_ 36457922_ 36457981_ 36463805_ 36463850	SE	ENSG00000116898,11	MRPS15	chr1	1	-0.106	0.00167646	-0.726	0.00967281	-0.62
MRPS28_ 80028694_ 80028796_ 80002998_ 80003180_ 80029760_ 80029912	SE	ENSG00000147586,9	MRPS28	chr8	0.0335712	0.226	1	0.027	0.0238948	-0.199
MRPS28_ 80028694_ 80028796_ 80002998_ 80003180_ 80029904_ 80029974	SE	ENSG00000147586,9	MRPS28	chr8	0.00219556	0.395	1	0.174	0.0012574	-0.221
MRPS28_ 80028694_ 80028796_ 80002998_ 80003180_ 80030053_ 80030232	SE	ENSG00000147586,9	MRPS28	chr8	0.0434794	0.122	1	0.07	0.67711	-0.052
MSANTD2_124779049_124779139_124774803_124774818_124799870_124800364	SE	ENSG00000120458,11	MSANTD2	chr11	0.393649	0.147	0.0408968	0.179	1	0.032
MTERF4_241097242_241097427_241094276_241094432_241102252_241102299	SE	ENSG00000122085,16	MTERF4	chr2	0.479308	-0.143	0.0106561	-0.216	1	-0.074
MTERF4_241099395_241099894_241094405_241094432_241102252_241102287	SE	ENSG00000122085,16	MTERF4	chr2	0.500021	-0.314	0.0002702	-0.544	1	-0.23
MTFP1_ 30427121_ 30427403_ 30426716_ 30426844_ 30428461_ 30428643	SE	ENSG00000242114,5	MTFP1	chr22	0.909961	0.141	0.481209	-0.059	0.0190361	-0.2
MTFP1_ 30427170_ 30427403_ 30426716_ 30426844_ 30428461_ 30429053	SE	ENSG00000242114,5	MTFP1	chr22	1	0.074	0.178757	-0.051	0.0171791	-0.125
MTFP1_ 30427239_ 30427403_ 30426716_ 30426844_ 30428461_ 30428951	SE	ENSG00000242114,5	MTFP1	chr22	1	0.093	0.263761	-0.049	0.0186476	-0.142
MTHFD2L_ 74160054_ 74160088_ 74158107_ 74158281_ 74174505_ 74174690	SE	ENSG00000163738,18	MTHFD2L	chr4	0.00343857	-0.225	1	-0.047	0.0195822	0.178
MTMR2_ 95887611_ 95887684_ 95865439_ 95865676_ 95888155_ 95888261	SE	ENSG00000087053,18	MTMR2	chr11	0.047087	0.126	1	-0.054	0.0620698	-0.18
MTMR4_ 58514991_ 58515083_ 58512851_ 58512941_ 58516579_ 58516618	SE	ENSG00000108389,9	MTMR4	chr17	0.479919	0.03	1	0.177	0.0410796	0.146
MUTYH_ 45338506_ 45338656_ 45334390_ 45334511_ 45339898_ 45339935	SE	ENSG00000132781,17	MUTYH	chr1	0.00594129	0.227	0.0240502	0.194	1	-0.033
MXRA7_ 76683846_ 76683927_ 76672550_ 76677702_ 76685071_ 76685165	SE	ENSG00000182534,13	MXRA7	chr17	0.881599	0.057	0.0262009	0.119	0.663614	0.062
MYLK_123732895_123733102_123725943_123726078_123733686_123734222	SE	ENSG00000065534,18	MYLK	chr3	0.0141491	0.516	1	-0.085	1	-0.601
MYO1B_191400748_191400835_191400381_191400468_191402631_191402718	SE	ENSG00000128641,18	MYO1B	chr2	1	0.259	0.00495717	0.503	0.161242	0.244
MYO5A_ 52343116_ 52343197_ 52340195_ 52340394_ 52346360_ 52346461	SE	ENSG00000197535,14	MYO5A	chr15	0.0915509	-0.155	0.215108	0.093	3.52547e-05	0.248
N4BP2_ 40097226_ 40097569_ 40073454_ 40073551_ 40102074_ 40103218	SE	ENSG00000078177,13	N4BP2	chr4	0.0126822	-0.395	0.00900982	-0.559	1	-0.164
N4BP2L2_ 32480589_ 32480637_ 32443965_ 32444126_ 32517856_ 32517920	SE	ENSG00000244754,8	N4BP2L2	chr13	2.42622e-07	-0.698	1	-0.31	1	0.388
N4BP2L2_ 32517856_ 32518003_ 32442387_ 32444126_ 32535768_ 32537027	SE	ENSG00000244754,8	N4BP2L2	chr13	1	-0.249	0.0253209	-0.249	NA	NA
N4BP2L2_ 32538617_ 32538684_ 32536426_ 32537027_ 32538777_ 32538825	SE	ENSG00000244754,8	N4BP2L2	chr13	1	-0.035	0.0370369	-0.108	0.114855	-0.074
NAA16_ 41355143_ 41355216_ 41336649_ 41336756_ 41358303_ 41358473	SE	ENSG00000172766,18	NAA16	chr13	0.842055	0.098	0.219697	-0.083	0.00305436	-0.181
NAB1_190655976_190656153_190649845_190649982_190659157_190659362	SE	ENSG00000138386,16	NAB1	chr2	1	-0.061	0.00480982	-0.308	0.016602	-0.247
NADK2_ 36208624_ 36208690_ 36207169_ 36207265_ 36211843_ 36211922	SE	ENSG00000152620,12	NADK2	chr5	0.0394287	0.117	1	-0.077	0.00508706	-0.194
NAE1_ 66823528_ 66823600_ 66821445_ 66821559_ 66826522_ 66826583	SE	ENSG00000159593,14	NAE1	chr16	0.0248168	-0.461	0.0111591	-0.423	1	0.038
NAE1_ 66823528_ 66823600_ 66821445_ 66821559_ 66830846_ 66830917	SE	ENSG00000159593,14	NAE1	chr16	0.0351473	-0.333	1	-0.667	1	-0.333
NAT9_ 74773865_ 74773939_ 74773575_ 74773685_ 74775598_ 74775707	SE	ENSG00000109065,11	NAT9	chr17	1.89918e-10	-0.84	NA	NA	1	0.309
NAV2_ 20056529_ 20056628_ 20055768_ 20055957_ 20062306_ 20062359	SE	ENSG00000166833,20	NAV2	chr11	0.860261	0.045	0.358017	-0.102	0.0321186	-0.146
NAXD_110625189_110625278_110624233_110624279_110634544_110634595	SE	ENSG00000213995,11	NAXD	chr13	0.020434	0.133	1	-0.041	NA	NA
NAXD_110627438_110627547_110624233_110624279_110634544_110634595	SE	ENSG00000213995,11	NAXD	chr13	0.0404927	0.099	1	-0.037	0.000467705	-0.136
NBPF15_144448774_144448916_144440140_144440295_144456536_144456805	SE	ENSG00000266338,6	NBPF15	chr1	0.024498	-0.232	0.769471	-0.12	1	0.113
NDRG2_ 21024029_ 21024096_ 21022879_ 21023321_ 21025676_ 21025776	SE	ENSG00000165795,23	NDRG2	chr14	1	-0.073	0.0227612	0.174	0.00611144	0.247
NDRG4_ 58500987_ 58501077_ 58500089_ 58500269_ 58503705_ 58503903	SE	ENSG00000103034,14	NDRG4	chr16	1	-0.041	0.0227982	0.261	0.000647546	0.302
NDST1_150518797_150518919_150508146_150508226_150520867_150521102	SE	ENSG00000070614,14	NDST1	chr5	0.0492756	-0.38	1	-0.213	1	0.167
NDUFB5_179616982_179617044_179604790_179604939_179623919_179624498	SE	ENSG00000136521,12	NDUFB5	chr3	NA	NA	0.0176697	0.149	0.0174104	0.149
NDUFS8_ 68032151_ 68032209_ 68030616_ 68030733_ 68032922_ 68033012	SE	ENSG00000110717,12	NDUFS8	chr11	0.00132462	-0.265	1	-0.021	0.000924975	0.244
NEDD1_ 96917620_ 96917737_ 96907603_ 96907856_ 96919984_ 96920118	SE	ENSG00000139350,11	NEDD1	chr12	0.0679654	-0.105	0.049122	-0.125	1	-0.021
NEDD4_ 55991925_ 55992005_ 55966472_ 55966546_ 55993510_ 55993602	SE	ENSG00000069869,16	NEDD4	chr15	0.0966905	-0.114	1	0.03	0.00789601	0.144
NEK11_131027929_131028002_131026882_131027006_131029612_131029878	SE	ENSG00000114670,13	NEK11	chr3	1	0.571	1	-0.143	0.000250738	-0.714
NFATC3_ 68121986_ 68123121_ 68085343_ 68085784_ 68126447_ 68126610	SE	ENSG00000072736,18	NFATC3	chr16	0.245267	0.151	0.0308871	0.242	1	0.092
NGLY1_ 25720013_ 25720191_ 25718943_ 25719635_ 25729132_ 25729318	SE	ENSG00000151092,16	NGLY1	chr3	0.254557	0.158	1	-0.049	0.0199032	-0.207
NHLRC3_ 39042104_ 39042305_ 39039563_ 39039711_ 39044089_ 39044181	SE	ENSG00000188811,13	NHLRC3	chr13	0.43468	0.09	1	-0.07	0.016602	-0.16
NIFK-AS1_121650300_121650381_121649649_121649911_121650467_121651535	SE	ENSG00000236859,6	NIFK-AS1	chr2	0.0798898	-0.094	0.0487668	-0.202	1	-0.108
NIM1K_ 43245081_ 43246067_ 43192224_ 43192411_ 43277056_ 43277325	SE	ENSG00000177453,7	NIM1K	chr5	2.44064e-05	0.474	NA	NA	1.77479e-05	-0.474
NLGN3_ 71148845_ 71148905_ 71147549_ 71148206_ 71155213_ 71155363	SE	ENSG00000196338,12	NLGN3	chrX	1	-0.032	0.00626822	-0.137	0.137715	-0.104
NME6_ 48300526_ 48300634_ 48298426_ 48298523_ 48301278_ 48301325	SE	ENSG00000172113,9	NME6	chr3	4.59376e-05	0.598	7.29988e-05	0.598	NA	NA
NME6_ 48300526_ 48300634_ 48298426_ 48298523_ 48301295_ 48301368	SE	ENSG00000172113,9	NME6	chr3	0.00223126	0.545	NA	NA	1	0.05
NME6_ 48300526_ 48300634_ 48298426_ 48298523_ 48301352_ 48301387	SE	ENSG00000172113,9	NME6	chr3	0.000200639	0.408	0.000334576	0.408	NA	NA
NOL10_ 10644319_ 10644372_ 10607184_ 10607311_ 10657741_ 10657891	SE	ENSG00000115761,15	NOL10	chr2	1	-0.027	0.093343	0.126	0.0205243	0.153
NOX4_ 89342073_ 89342193_ 89340062_ 89340171_ 89354961_ 89355043	SE	ENSG00000086991,12	NOX4	chr11	0.240019	0.188	1	-0.393	0.000208582	-0.58
NPIPA1_ 14950751_ 14950821_ 14950219_ 14950255_ 14951614_ 14952060	SE	ENSG00000183426,16	NPIPA1	chr16	1	0.135	0.0107241	-0.584	1.95774e-06	-0.719
NR2C1_ 95031348_ 95031488_ 95025149_ 95025255_ 95040475_ 95040597	SE	ENSG00000120798,16	NR2C1	chr12	0.029094	0.284	1	0.011	0.0184968	-0.273
NR2C1_ 95031348_ 95031488_ 95028386_ 95028524_ 95040475_ 95040597	SE	ENSG00000120798,16	NR2C1	chr12	0.304185	-0.232	0.0099003	-0.29	1	-0.058
NR2F2-AS1_ 96271702_ 96271798_ 96268771_ 96269996_ 96272761_ 96272816	SE	ENSG00000247809,7	NR2F2-AS1	chr15	0.00732485	-0.323	0.00833684	-0.328	1	-0.006
NRF1_129641724_129641822_129611746_129611824_129657345_129657574	SE	ENSG00000106459,14	NRF1	chr7	1	-0.058	0.0643094	-0.62	0.0235726	-0.562
NRG1_ 32742007_ 32742075_ 32727948_ 32728078_ 32742674_ 32743224	SE	ENSG00000157168,18	NRG1	chr8	0.862559	-0.063	1	0.071	0.024386	0.133
NSD2_ 1912090_ 1912194_ 1900649_ 1901251_ 1916870_ 1917037	SE	ENSG00000109685,17	NSD2	chr4	0.119479	-0.436	0.0477796	-0.555	NA	NA
NSMCE1_ 27241352_ 27241484_ 27235177_ 27235299_ 27241798_ 27241889	SE	ENSG00000169189,16	NSMCE1	chr16	0.004845	-0.338	1	-0.602	1	-0.264
NSMCE2_125102013_125102146_125091843_125091958_125102316_125102487	SE	ENSG00000156831,7	NSMCE2	chr8	0.00136845	0.355	1	0.056	0.0195822	-0.299
NSMCE2_125102050_125102146_125091843_125091958_125102316_125102464	SE	ENSG00000156831,7	NSMCE2	chr8	9.04492e-05	0.276	1	0.057	0.0111888	-0.22
NSRP1_ 30163066_ 30163162_ 30156539_ 30156662_ 30172541_ 30172598	SE	ENSG00000126653,17	NSRP1	chr17	1	-0.519	1	-0.002	0.00747797	0.517
NSUN5P1_ 75412788_ 75412932_ 75410361_ 75410460_ 75414884_ 75415023	SE	ENSG00000223705,9	NSUN5P1	chr7	0.8281	0.112	0.545764	-0.174	0.0208967	-0.286
NSUN6_ 18642475_ 18642555_ 18616183_ 18616293_ 18651128_ 18651622	SE	ENSG00000241058,3	NSUN6	chr10	NA	NA	0.245416	-0.338	0.0111888	-0.231
NSUN6_ 18648489_ 18648645_ 18642475_ 18642555_ 18651128_ 18651622	SE	ENSG00000241058,3	NSUN6	chr10	NA	NA	0.000728763	0.2	0.00061635	0.2
NT5C2_103111744_103111805_103105705_103105801_103139405_103139479	SE	ENSG00000076685,18	NT5C2	chr10	1	0.082	0.00276494	-0.504	0.00773372	-0.586
NT5C2_103111744_103111805_103106588_103106706_103139405_103139479	SE	ENSG00000076685,18	NT5C2	chr10	0.0860997	0.063	0.903646	-0.063	0.000898334	-0.125
NTRK3_ 87885693_ 87885735_ 87880269_ 87880428_ 87929190_ 87929434	SE	ENSG00000140538,16	NTRK3	chr15	0.000229818	0.442	1	0.418	1	-0.024
NUCB2_ 17286633_ 17286717_ 17282788_ 17282943_ 17295323_ 17295425	SE	ENSG00000070081,16	NUCB2	chr11	1	0.012	0.170542	-0.106	0.0410796	-0.118
NUMA1_ 72069841_ 72069911_ 72035901_ 72035975_ 72080457_ 72080494	SE	ENSG00000137497,17	NUMA1	chr11	0.0479564	-0.145	0.135629	-0.14	1	0.006
NUP54_ 76134174_ 76134362_ 76124648_ 76124756_ 76144148_ 76144292	SE	ENSG00000138750,14	NUP54	chr4	1	-0.147	0.0412539	-0.491	0.0892262	-0.344
NUP54_ 76134174_ 76134362_ 76124648_ 76124756_ 76144389_ 76144473	SE	ENSG00000138750,14	NUP54	chr4	0.00782505	0.425	NA	NA	1	0.281
NUP54_ 76144148_ 76144292_ 76124648_ 76124756_ 76144389_ 76144473	SE	ENSG00000138750,14	NUP54	chr4	0.00655771	0.11	1	0.078	0.481342	-0.033
NVL_224301690_224301771_224300561_224300663_224303722_224303857	SE	ENSG00000143748,17	NVL	chr1	0.909961	0.061	0.582527	-0.099	0.0298866	-0.16
OCIAD1_ 48831226_ 48831433_ 48831062_ 48831141_ 48832619_ 48832682	SE	ENSG00000109180,14	OCIAD1	chr4	0.855303	0.217	0.389961	-0.273	0.0058008	-0.49
OCIAD1_ 48831226_ 48831496_ 48831008_ 48831052_ 48832619_ 48832682	SE	ENSG00000109180,14	OCIAD1	chr4	0.00347203	-0.166	0.0355705	-0.135	1	0.032
OCIAD1_ 48857212_ 48857365_ 48851805_ 48852020_ 48860724_ 48861200	SE	ENSG00000109180,14	OCIAD1	chr4	0.00161121	-0.122	1	-0.019	0.00486514	0.103
OSBPL6_178324176_178324269_178306029_178306286_178328255_178328378	SE	ENSG00000079156,16	OSBPL6	chr2	0.0492756	-0.173	1	-0.045	0.312437	0.128
OSBPL9_ 51756319_ 51756358_ 51750144_ 51750195_ 51760689_ 51760764	SE	ENSG00000117859,18	OSBPL9	chr1	1	0.046	0.0340266	-0.142	0.00287882	-0.188
OSGEP_ 20451256_ 20451452_ 20449221_ 20449266_ 20451994_ 20452149	SE	ENSG00000092094,10	OSGEP	chr14	NA	NA	0.0236699	-0.341	1.95774e-06	-0.674
P2RX7_121166057_121166187_121165356_121165437_121175387_121175478	SE	ENSG00000089041,16	P2RX7	chr12	0.338788	0.333	0.315465	-0.1	0.000338488	-0.433
P2RX7_121167487_121167624_121165356_121165437_121175387_121175478	SE	ENSG00000089041,16	P2RX7	chr12	1	0.137	NA	NA	0.0249142	-0.203
PAFAH2_ 25997447_ 25997621_ 25990726_ 25990863_ 25998024_ 25998055	SE	ENSG00000158006,13	PAFAH2	chr1	0.0175856	-0.167	1	-0.087	0.085454	0.08
PAK1_ 77349238_ 77349287_ 77343818_ 77343931_ 77358897_ 77358953	SE	ENSG00000149269,9	PAK1	chr11	1	-0.047	0.0507532	0.271	0.016602	0.318
PANK1_ 89593812_ 89593989_ 89593196_ 89593320_ 89599251_ 89599505	SE	ENSG00000152782,16	PANK1	chr10	1	-0.036	0.00914506	-0.149	0.00714746	-0.112
PAPOLA_ 96560648_ 96560711_ 96556174_ 96556413_ 96562818_ 96562893	SE	ENSG00000090060,17	PAPOLA	chr14	1	0.032	0.0518031	-0.104	0.00714746	-0.136
PAQR3_ 78935120_ 78935176_ 78930169_ 78930325_ 78939039_ 78939195	SE	ENSG00000163291,14	PAQR3	chr4	0.0296537	0.204	1	0.024	0.142575	-0.18
PARD3_ 34284134_ 34284245_ 34269656_ 34269899_ 34317106_ 34317338	SE	ENSG00000148498,15	PARD3	chr10	0.0283375	0.213	1	0.059	0.223444	-0.153
PARD3_ 34336198_ 34336243_ 34331116_ 34331344_ 34337277_ 34337426	SE	ENSG00000148498,15	PARD3	chr10	0.00893774	-0.174	1	-0.029	0.124577	0.146
PARD6G_ 80202709_ 80202932_ 80157231_ 80160606_ 80247276_ 80247348	SE	ENSG00000178184,15	PARD6G	chr18	0.226979	0.088	1	-0.057	0.00454031	-0.145
PARL_183842297_183842384_183840569_183840640_183844230_183844274	SE	ENSG00000175193,13	PARL	chr3	1	0.096	1	-0.073	0.0216553	-0.169
PARPBP_102165728_102165883_102123885_102124041_102195950_102196368	SE	ENSG00000185480,11	PARPBP	chr12	0.00409807	0.287	1	0.109	0.389284	-0.178
PBRM1_ 52682091_ 52682233_ 52679573_ 52679726_ 52685435_ 52685578	SE	ENSG00000163939,18	PBRM1	chr3	0.0132328	0.233	1	0.074	1	-0.158
PCBP1-AS1_ 70055713_ 70055910_ 70051016_ 70051305_ 70085546_ 70085575	SE	ENSG00000179818,13	PCBP1-AS1	chr2	0.0996232	-0.307	1	-0.004	0.0151713	0.303
PCBP4_ 51961940_ 51962088_ 51961159_ 51961304_ 51967325_ 51967445	SE	ENSG00000090097,21	PCBP4	chr3	0.0243879	-0.126	1	-0.055	0.620011	0.07
PCDH15_ 53827392_ 53827548_ 53811548_ 53811619_ 53831314_ 53831533	SE	ENSG00000150275,18	PCDH15	chr10	1	0.039	0.00169093	-0.231	1	-0.27
PCGF6_103347237_103347297_103345023_103345132_103348715_103348812	SE	ENSG00000156374,15	PCGF6	chr10	2.10114e-05	0.411	1	0.044	0.000338488	-0.367
PCMTD1_ 51860844_ 51861246_ 51845660_ 51845763_ 51898929_ 51899036	SE	ENSG00000168300,13	PCMTD1	chr8	1	0.074	0.845243	-0.186	0.0393596	-0.26
PCMTD1_ 51860860_ 51861246_ 51845660_ 51845763_ 51898929_ 51899113	SE	ENSG00000168300,13	PCMTD1	chr8	1	0.085	0.426129	-0.294	0.0112978	-0.38
PCNX1_ 70988566_ 70988699_ 70976941_ 70978648_ 70995740_ 70995843	SE	ENSG00000100731,15	PCNX1	chr14	1	-0.032	0.0369387	0.212	0.0143535	0.244
PDCD10_167725400_167725473_167720061_167720273_167734458_167734510	SE	ENSG00000114209,14	PDCD10	chr3	1	-0.025	0.0408968	0.131	0.171545	0.156
PDE9A_ 42686191_ 42686262_ 42653748_ 42653883_ 42698967_ 42699011	SE	ENSG00000160191,17	PDE9A	chr21	1	-0.059	0.00328268	-0.277	0.166821	-0.218
PDE9A_ 42687916_ 42687994_ 42653778_ 42653883_ 42698967_ 42699011	SE	ENSG00000160191,17	PDE9A	chr21	0.880071	-0.092	0.0205503	-0.2	0.506016	-0.108
PDK1_172558707_172558849_172555968_172556346_172586277_172586388	SE	ENSG00000152256,13	PDK1	chr2	0.00132117	-0.21	0.000651591	-0.21	NA	NA
PDK1_172570725_172570824_172555968_172556346_172586277_172586388	SE	ENSG00000152256,13	PDK1	chr2	0.00891286	-0.124	0.00320204	-0.124	NA	NA
PDSS2_107210438_107210570_107193821_107193854_107245547_107245619	SE	ENSG00000164494,11	PDSS2	chr6	0.0283269	-0.295	0.0269753	-0.295	NA	NA
PDSS2_107212108_107212282_107193821_107193854_107245547_107245619	SE	ENSG00000164494,11	PDSS2	chr6	0.0163828	-0.31	0.0158296	-0.31	NA	NA
PFKFB4_ 48548531_ 48548659_ 48539696_ 48539771_ 48549863_ 48549895	SE	ENSG00000114268,11	PFKFB4	chr3	1	-0.179	0.00853488	-0.404	NA	NA
PGAP2_ 3811249_ 3811424_ 3808289_ 3808315_ 3823882_ 3824135	SE	ENSG00000148985,19	PGAP2	chr11	1	-0.118	0.0464872	-0.288	0.233347	-0.17
PGF_ 74946212_ 74946275_ 74941833_ 74942733_ 74946378_ 74946408	SE	ENSG00000119630,13	PGF	chr14	1	0.899	1	0.478	0.0377839	-0.421
PHACTR4_ 28457831_ 28457855_ 28438150_ 28438430_ 28459084_ 28459258	SE	ENSG00000204138,12	PHACTR4	chr1	1	-0.444	1	-0.019	0.00660688	0.426
PHF3_ 63684128_ 63685911_ 63679999_ 63680161_ 63691736_ 63692043	SE	ENSG00000118482,11	PHF3	chr6	0.360195	0.131	1	-0.138	0.00123402	-0.269
PHYKPL_178215275_178215430_178214795_178214885_178222354_178222476	SE	ENSG00000175309,14	PHYKPL	chr5	0.574356	0.096	0.309009	-0.047	0.00353036	-0.143
PIBF1_ 72827732_ 72827914_ 72827009_ 72827118_ 72835242_ 72835368	SE	ENSG00000083535,15	PIBF1	chr13	1	0.038	0.133188	-0.076	0.0367876	-0.114
PICALM_ 86031468_ 86031611_ 86014869_ 86014963_ 86068650_ 86068733	SE	ENSG00000073921,17	PICALM	chr11	0.17468	0.061	0.00206449	0.124	1	0.063
PIGK_ 77206639_ 77206731_ 77169259_ 77169395_ 77219309_ 77219426	SE	ENSG00000142892,14	PIGK	chr1	NA	NA	0.0153148	-0.17	1	-0.041
PIGK_ 77210435_ 77210489_ 77169259_ 77169395_ 77219309_ 77219426	SE	ENSG00000142892,14	PIGK	chr1	NA	NA	0.0100445	-0.212	1	-0.07
PIGN_ 62162252_ 62162329_ 62161132_ 62161385_ 62163530_ 62163656	SE	ENSG00000197563,10	PIGN	chr18	1	-0.069	0.00495717	0.424	0.000313306	0.493
PIGV_ 26794112_ 26795234_ 26790758_ 26790893_ 26797562_ 26798393	SE	ENSG00000060642,10	PIGV	chr1	NA	NA	0.0500063	0.356	0.0428506	0.356
PILRB_100353372_100353483_100353209_100353270_100353894_100354012	SE	ENSG00000121716,20	PILRB	chr7	1	0.033	0.013328	0.169	0.21223	0.136
PISD_ 31628002_ 31628210_ 31625762_ 31626016_ 31628852_ 31628981	SE	ENSG00000241878,11	PISD	chr22	0.0258433	0.554	0.00661449	0.521	0.407555	-0.033
PITPNM2_122991754_122991898_122990544_122990709_122992498_122992669	SE	ENSG00000090975,12	PITPNM2	chr12	0.0113858	-0.575	1	-0.153	1	0.422
PJVK_178458509_178458627_178456009_178456151_178460981_178461215	SE	ENSG00000204311,13	PJVK	chr2	0.00502079	-0.452	1	-0.166	0.0796461	0.286
PJVK_178460347_178460446_178456009_178456151_178460981_178461204	SE	ENSG00000204311,13	PJVK	chr2	0.0103773	-0.448	1	-0.197	0.101206	0.251
PKNOX2_125239615_125239728_125235044_125235115_125331818_125331925	SE	ENSG00000165495,15	PKNOX2	chr11	0.577588	-0.152	1.10969e-05	-0.301	0.338248	-0.149
PKP4_158577270_158577383_158533179_158533316_158603069_158603104	SE	ENSG00000144283,21	PKP4	chr2	0.813341	0.076	0.583897	-0.057	0.037678	-0.133
PLA2G6_ 38144895_ 38144978_ 38143236_ 38143288_ 38145437_ 38145653	SE	ENSG00000184381,18	PLA2G6	chr22	0.0141342	0.234	1	0.108	0.510493	-0.126
PLCB4_ 9373046_ 9373104_ 9372302_ 9372403_ 9380053_ 9380162	SE	ENSG00000101333,16	PLCB4	chr20	0.00310052	-0.533	1	0.268	1	0.801
PLD3_ 40365552_ 40365930_ 40348671_ 40348724_ 40366418_ 40366464	SE	ENSG00000105223,19	PLD3	chr19	1	0.091	0.0506026	-0.064	0.00596769	-0.155
PLD3_ 40365717_ 40365930_ 40348506_ 40348724_ 40366418_ 40366464	SE	ENSG00000105223,19	PLD3	chr19	1	0.066	0.0343928	-0.049	0.00556014	-0.115
PLD3_ 40365717_ 40365930_ 40365552_ 40365585_ 40366418_ 40366464	SE	ENSG00000105223,19	PLD3	chr19	1	0.033	0.0388074	-0.073	0.00424006	-0.106
PLEKHA3_178488967_178489014_178485640_178485757_178490658_178490814	SE	ENSG00000116095,10	PLEKHA3	chr2	0.157016	-0.058	0.0418348	-0.155	1	-0.097
PLOD2_146077861_146077924_146073286_146073352_146079115_146079257	SE	ENSG00000152952,11	PLOD2	chr3	0.0110406	-0.151	0.00187208	-0.16	1	-0.009
PLSCR1_146536539_146536565_146533469_146533550_146544466_146544530	SE	ENSG00000188313,12	PLSCR1	chr3	0.0566548	0.101	1	-0.009	0.0163523	-0.111
PMM2_ 8811078_ 8811178_ 8801798_ 8801910_ 8811641_ 8811713	SE	ENSG00000140650,11	PMM2	chr16	0.00192387	-0.793	1	-0.603	1	0.19
POLD2_ 44122281_ 44122459_ 44122087_ 44122109_ 44122886_ 44123496	SE	ENSG00000106628,10	POLD2	chr7	1	-0.042	1	0.582	0.00623806	0.624
POLM_ 44074130_ 44074220_ 44073782_ 44074025_ 44074397_ 44074530	SE	ENSG00000122678,16	POLM	chr7	0.00612465	-0.186	0.669777	-0.067	1	0.119
POLM_ 44074130_ 44074233_ 44073782_ 44074025_ 44074397_ 44074530	SE	ENSG00000122678,16	POLM	chr7	0.00811207	-0.147	0.382954	-0.071	1	0.075
POLQ_121529644_121529792_121522002_121522149_121532989_121533209	SE	ENSG00000051341,13	POLQ	chr3	1	-0.01	0.0582831	-0.135	0.0146294	-0.125
POLR2H_184362872_184363565_184361717_184362146_184364965_184365049	SE	ENSG00000163882,9	POLR2H	chr3	0.487839	-0.085	0.0179747	-0.132	1	-0.048
POLR2J3_102541092_102541303_102540014_102540091_102566996_102567070	SE	ENSG00000168255,20	POLR2J3	chr7	0.646541	-0.138	0.0361973	-0.19	1	-0.051
POLR2J3_102545302_102545420_102544705_102544776_102566996_102567083	SE	ENSG00000168255,20	POLR2J3	chr7	0.0214305	0.12	0.355247	0.181	0.251114	0.061
POLR2J4_ 44014605_ 44014783_ 44013592_ 44013679_ 44016433_ 44016523	SE	ENSG00000214783,9	POLR2J4	chr7	0.0465287	-0.19	0.402832	-0.138	1	0.052
POU2F1_167303473_167303574_167220889_167220958_167332469_167332535	SE	ENSG00000143190,22	POU2F1	chr1	0.00690972	-0.527	1	0.055	6.09914e-05	0.583
PPARA_ 46219811_ 46220014_ 46218262_ 46218401_ 46231791_ 46232239	SE	ENSG00000186951,16	PPARA	chr22	0.0934014	-0.119	0.0183584	-0.139	1	-0.019
PPHLN1_ 42351884_ 42352049_ 42335882_ 42335974_ 42355160_ 42355222	SE	ENSG00000134283,17	PPHLN1	chr12	0.141416	0.113	0.307599	-0.11	0.000833078	-0.223
PPHLN1_ 42384939_ 42384996_ 42355160_ 42355222_ 42387455_ 42387535	SE	ENSG00000134283,17	PPHLN1	chr12	0.056026	-0.162	0.0333835	-0.175	1	-0.013
PPHLN1_ 42384939_ 42384996_ 42374862_ 42375074_ 42387455_ 42387535	SE	ENSG00000134283,17	PPHLN1	chr12	0.0256206	-0.21	0.260896	-0.167	1	0.042
PPIE_ 39745374_ 39748767_ 39743823_ 39743924_ 39748902_ 39749088	SE	ENSG00000084072,16	PPIE	chr1	0.179922	0.232	0.00616801	0.362	1	0.13
PPIE_ 39762516_ 39762651_ 39752909_ 39753052_ 39763688_ 39763914	SE	ENSG00000084072,16	PPIE	chr1	1.65125e-05	-0.692	0.00355491	-0.515	0.152606	0.178
PPOX_161167370_161167486_161167099_161167234_161170619_161170769	SE	ENSG00000143224,17	PPOX	chr1	NA	NA	0.0193121	0.216	1	0.014
PPP1R3E_ 23300106_ 23300139_ 23299400_ 23299541_ 23300757_ 23300864	SE	ENSG00000235194,8	PPP1R3E	chr14	1	0	0.0239902	-0.461	0.017829	-0.461
PPP1R7_241150258_241150547_241149637_241149708_241153475_241153604	SE	ENSG00000115685,14	PPP1R7	chr2	1	0.068	0.0420989	0.23	0.151636	0.162
PPP2R1B_111753442_111753577_111752158_111752332_111754498_111754569	SE	ENSG00000137713,15	PPP2R1B	chr11	1	0.045	0.379911	-0.075	0.0325349	-0.12
PPP2R2B_146878001_146878195_146701044_146701142_147035168_147035240	SE	ENSG00000156475,18	PPP2R2B	chr5	1	-0.351	0.0178802	-0.351	NA	NA
PPP2R2B_146878001_146878195_146701044_146701142_147055664_147056027	SE	ENSG00000156475,18	PPP2R2B	chr5	0.00176807	-0.484	1	-0.218	1	0.266
PPP2R2B_147040716_147040805_146878001_146878195_147055664_147055931	SE	ENSG00000156475,18	PPP2R2B	chr5	1	0.448	0.00303336	0.499	NA	NA
PPP2R3C_ 35108138_ 35108236_ 35099251_ 35099384_ 35109818_ 35109847	SE	ENSG00000092020,10	PPP2R3C	chr14	0.0355118	-0.133	1	-0.06	0.257507	0.073
PPP4R1L_ 58271362_ 58271505_ 58251756_ 58251864_ 58272768_ 58272825	SE	ENSG00000124224,16	PPP4R1L	chr20	0.218522	0.404	0.879352	-0.103	0.0032266	-0.508
PRDM2_ 13778417_ 13782831_ 13773077_ 13773188_ 13816426_ 13816570	SE	ENSG00000116731,22	PRDM2	chr1	0.0014173	-0.571	1	-0.119	0.00239367	0.452
PRDX5_ 64319733_ 64319868_ 64318087_ 64318386_ 64320864_ 64320903	SE	ENSG00000126432,13	PRDX5	chr11	0.0283269	0.111	0.0788618	0.077	1	-0.034
PRIM1_ 56751037_ 56751195_ 56746780_ 56747032_ 56752195_ 56752269	SE	ENSG00000198056,13	PRIM1	chr12	0.00124661	0.099	1	-0.01	7.50925e-05	-0.109
PRKAB1_119671494_119671668_119668149_119668403_119672300_119672427	SE	ENSG00000111725,10	PRKAB1	chr12	0.494988	0.097	0.0427427	0.117	1	0.02
PROCA1_ 28706679_ 28706763_ 28704707_ 28704843_ 28707837_ 28707884	SE	ENSG00000167525,13	PROCA1	chr17	1	-0.066	0.00276771	-0.4	NA	NA
PRPSAP2_ 18859339_ 18859475_ 18856341_ 18856476_ 18865468_ 18865564	SE	ENSG00000141127,14	PRPSAP2	chr17	0.011386	-0.299	1	0.278	9.83406e-05	0.577
PRPSAP2_ 18859339_ 18859475_ 18858103_ 18858261_ 18865468_ 18865564	SE	ENSG00000141127,14	PRPSAP2	chr17	1	-0.075	0.540263	0.132	0.0319267	0.207
PRUNE1_151028785_151028944_151027232_151027327_151033805_151033837	SE	ENSG00000143363,16	PRUNE1	chr1	0.0485762	-0.199	1	-0.049	0.235692	0.15
PSMD6_ 64022642_ 64022801_ 64022317_ 64022523_ 64023391_ 64023458	SE	ENSG00000163636,10	PSMD6	chr3	1	-0.065	0.825408	0.198	0.00791645	0.263
PSME3_ 42834093_ 42834256_ 42833775_ 42833939_ 42834343_ 42834376	SE	ENSG00000131467,10	PSME3	chr17	0.0102878	0.261	0.24186	0.103	1	-0.158
PSMG4_ 3263683_ 3263759_ 3258893_ 3259196_ 3302857_ 3303373	SE	ENSG00000180822,11	PSMG4	chr6	0.0270676	0.104	1	-0.06	0.000694903	-0.164
PSPH_ 56033960_ 56034106_ 56031928_ 56031977_ 56051137_ 56051446	SE	ENSG00000146733,13	PSPH	chr7	0.582631	-0.259	0.000200672	-0.362	1	-0.103
PTBP3_112275843_112276013_112268048_112268195_112297831_112297916	SE	ENSG00000119314,15	PTBP3	chr9	1	0.09	0.150807	-0.14	0.00457314	-0.23
PTGR1_111564156_111564262_111562576_111563231_111570090_111570209	SE	ENSG00000106853,19	PTGR1	chr9	0.0387616	0.278	0.708287	0.255	0.509166	-0.023
PTK2_140948665_140948723_140925660_140925749_141000879_141001122	SE	ENSG00000169398,19	PTK2	chr8	0.0307699	-0.615	NA	NA	0.864018	0.27
PTOV1-AS2_ 49858553_ 49858626_ 49858346_ 49858427_ 49858842_ 49859097	SE	ENSG00000269352,1	PTOV1-AS2	chr19	0.00114411	0.31	0.993069	0.27	1	-0.04
PTPA_129127963_129128068_129120512_129120610_129128984_129129110	SE	ENSG00000119383,19	PTPA	chr9	1	-0.047	NA	NA	0.0347444	-0.228
PTPRA_ 2947981_ 2948024_ 2923206_ 2923285_ 2964271_ 2964350	SE	ENSG00000132670,20	PTPRA	chr20	1	0.027	0.117329	-0.089	0.0358069	-0.116
PTTG1IP_ 44865570_ 44865650_ 44865394_ 44865447_ 44872853_ 44873032	SE	ENSG00000183255,11	PTTG1IP	chr21	0.0250685	0.475	1	-0.042	0.00183153	-0.517
PUF60_143827384_143827536_143824312_143824399_143828983_143829044	SE	ENSG00000179950,13	PUF60	chr8	1	0.032	0.171471	-0.23	0.0162802	-0.263
PUM2_ 20331716_ 20331937_ 20327309_ 20327378_ 20332966_ 20333063	SE	ENSG00000055917,15	PUM2	chr2	0.00222762	0.482	0.00919555	0.243	1	-0.238
PUS1_131929734_131929796_131929281_131929380_131929906_131930135	SE	ENSG00000177192,13	PUS1	chr12	1	-0.119	0.00524552	-0.404	0.0510752	-0.285
PUS1_131939172_131939275_131931514_131932312_131943538_131943859	SE	ENSG00000177192,13	PUS1	chr12	0.0304994	-0.126	NA	NA	1	0.067
PUS1_131941291_131941983_131931514_131932312_131943538_131943859	SE	ENSG00000177192,13	PUS1	chr12	0.00838816	-0.24	0.416206	-0.14	1	0.1
PUS3_125895906_125896330_125895223_125895789_125903169_125903221	SE	ENSG00000110060,8	PUS3	chr11	1	-0.105	0.502792	0.153	0.0281716	0.258
PVT1_128070159_128070361_128010317_128010444_128096517_128096656	SE	ENSG00000249859,9	PVT1	chr8	1	0.079	0.1287	0.46	0.00225939	0.381
PXMP2_132702428_132702564_132695883_132696046_132704618_132704898	SE	ENSG00000176894,9	PXMP2	chr12	1	-0.116	0.0271035	-0.228	NA	NA
PXYLP1_141262242_141262340_141260122_141260254_141278341_141278500	SE	ENSG00000155893,12	PXYLP1	chr3	0.0425065	0.13	1	0.059	1	-0.071
PYM1_ 55927075_ 55927267_ 55913825_ 55914366_ 55927724_ 55927875	SE	ENSG00000170473,16	PYM1	chr12	1	0.23	0.00529701	0.484	1	0.255
QRICH2_ 76277162_ 76277310_ 76276679_ 76276767_ 76277988_ 76278189	SE	ENSG00000129646,14	QRICH2	chr17	0.0409758	0.33	NA	NA	0.0334727	-0.33
QRICH2_ 76291014_ 76294021_ 76289991_ 76290077_ 76304414_ 76304525	SE	ENSG00000129646,14	QRICH2	chr17	1.87378e-05	0.658	NA	NA	1	-0.658
R3HCC1L_ 98156092_ 98156147_ 98134670_ 98134706_ 98162882_ 98162975	SE	ENSG00000166024,13	R3HCC1L	chr10	0.0397465	0.503	1	0.411	1	-0.092
R3HDM2_ 57395748_ 57395818_ 57310263_ 57310463_ 57430719_ 57430808	SE	ENSG00000179912,20	R3HDM2	chr12	0.531183	-0.146	0.0321634	-0.26	0.78606	-0.114
RAB1A_ 65088938_ 65089070_ 65086854_ 65088690_ 65097970_ 65098066	SE	ENSG00000138069,17	RAB1A	chr2	2.41399e-07	-0.087	0	-0.103	0.186901	-0.016
RAB1A_ 65090982_ 65091078_ 65086854_ 65088690_ 65097970_ 65098066	SE	ENSG00000138069,17	RAB1A	chr2	1.59405e-05	-0.119	2.98054e-08	-0.139	1	-0.019
RAB23_ 57210225_ 57210445_ 57196449_ 57196606_ 57221725_ 57222314	SE	ENSG00000112210,11	RAB23	chr6	0.0434875	0.176	0.0460178	0.261	1	0.085
RABL2A_113640893_113641005_113634152_113634232_113641352_113641450	SE	ENSG00000144134,18	RABL2A	chr2	1	-0.692	0.0388074	-0.692	NA	NA
RABL2B_ 50783038_ 50783286_ 50782233_ 50782347_ 50783500_ 50783663	SE	ENSG00000079974,17	RABL2B	chr22	NA	NA	1	-0.085	3.77424e-06	-0.765
RACK1_181243285_181243405_181242173_181242345_181243679_181243916	SE	ENSG00000204628,11	RACK1	chr5	NA	NA	0.000728763	-0.181	0.130902	-0.114
RAD17_ 179792_ 179942_ 176742_ 176889_ 183450_ 183571	SE	ENSG00000276618,4	RAD17	chrGL339449,2	1	-0.032	0.0183584	0.26	0.000694903	0.292
RAD51AP1_ 4556352_ 4556550_ 4552982_ 4553089_ 4558856_ 4559019	SE	ENSG00000111247,14	RAD51AP1	chr12	0.00124661	0.521	0.00895366	0.285	1	-0.236
RAD52_ 936806_ 936882_ 932974_ 933076_ 949601_ 949641	SE	ENSG00000002016,17	RAD52	chr12	0.0405241	-0.342	1	-0.009	0.0419351	0.333
RAI14_ 34813573_ 34813660_ 34812179_ 34812208_ 34814582_ 34814669	SE	ENSG00000039560,13	RAI14	chr5	0.0434794	-0.112	1	-0.025	0.677936	0.087
RALGAPA2_ 20396694_ 20396734_ 20392766_ 20393253_ 20412026_ 20412113	SE	ENSG00000188559,14	RALGAPA2	chr20	0.21388	0.121	1	-0.014	0.0271433	-0.135
RANGAP1_ 41284900_ 41285153_ 41280932_ 41281082_ 41285543_ 41285965	SE	ENSG00000100401,19	RANGAP1	chr22	0.021306	-0.312	0.892942	-0.128	0.974591	0.184
RAPGEF3_ 47740641_ 47740823_ 47740304_ 47740395_ 47740914_ 47741040	SE	ENSG00000079337,15	RAPGEF3	chr12	0.0143092	-0.545	1	-0.053	1	0.492
RAPGEF6_131450022_131450046_131446482_131446703_131453053_131453177	SE	ENSG00000158987,20	RAPGEF6	chr5	1	0.016	0.0172048	-0.137	0.00223716	-0.153
RAPH1_203470238_203470313_203461847_203461925_203477075_203477156	SE	ENSG00000173166,17	RAPH1	chr2	0.00133526	0.33	0.00480982	0.4	1	0.07
RAPH1_203477075_203477156_203470238_203470313_203489583_203490089	SE	ENSG00000173166,17	RAPH1	chr2	1	0.055	0.010254	-0.191	0.0145115	-0.246
RASSF8_ 25995036_ 25995130_ 25959028_ 25959148_ 26055278_ 26055446	SE	ENSG00000123094,15	RASSF8	chr12	0.379254	-0.189	0.00775859	-0.305	1	-0.116
RBM23_ 22908332_ 22908380_ 22906027_ 22906368_ 22911327_ 22911403	SE	ENSG00000100461,17	RBM23	chr14	0.00864556	0.136	0.0270979	0.16	1	0.024
RBM5_ 50100531_ 50100605_ 50099981_ 50100051_ 50103082_ 50103107	SE	ENSG00000003756,16	RBM5	chr3	0.00314686	-0.128	1	-0.057	0.0882657	0.071
RBMS2_ 56588931_ 56589018_ 56588293_ 56588374_ 56589139_ 56589503	SE	ENSG00000076067,12	RBMS2	chr12	1	-0.016	0.0103958	0.183	0.00322843	0.199
RBMXL1_ 88988251_ 88988351_ 88979458_ 88984066_ 88992584_ 88992759	SE	ENSG00000213516,9	RBMXL1	chr1	0.563487	0.082	0.006923	0.321	0.26966	0.239
RBSN_ 15082366_ 15082608_ 15080731_ 15080802_ 15084734_ 15084896	SE	ENSG00000131381,12	RBSN	chr3	0.014965	-0.176	0.0334867	-0.177	1	-0.001
RCBTB2_ 48521897_ 48521962_ 48515585_ 48515741_ 48524658_ 48524757	SE	ENSG00000136161,12	RCBTB2	chr13	0.00033481	-0.572	1	-0.318	NA	NA
RCBTB2_ 48522307_ 48522403_ 48515585_ 48515741_ 48524658_ 48524757	SE	ENSG00000136161,12	RCBTB2	chr13	0.000689896	-0.506	0.158091	-0.291	1	0.215
RELCH_ 62298789_ 62298860_ 62291542_ 62291631_ 62305413_ 62307112	SE	ENSG00000134444,14	RELCH	chr18	0.039963	0.103	1	0.019	0.100053	-0.083
REXO2_114447825_114447879_114440655_114440739_114449845_114449909	SE	ENSG00000076043,9	REXO2	chr11	0.0131492	-0.126	NA	NA	1	-0.014
RFC2_ 74243145_ 74243246_ 74238922_ 74238988_ 74249738_ 74249780	SE	ENSG00000049541,10	RFC2	chr7	0.452579	-0.195	0.249236	0.328	0.000188964	0.523
RFX1_ 13998117_ 13998317_ 13993524_ 13993895_ 14006102_ 14006262	SE	ENSG00000132005,8	RFX1	chr19	0.0292057	-0.365	0.0257016	-0.501	0.670918	-0.137
RFX3_ 3301545_ 3301620_ 3293076_ 3293258_ 3330258_ 3330517	SE	ENSG00000080298,15	RFX3	chr9	0.00855269	-0.155	0.00525122	-0.177	1	-0.022
RGS12_ 3386415_ 3386437_ 3342936_ 3343053_ 3414071_ 3414241	SE	ENSG00000159788,19	RGS12	chr4	1	-0.033	0.00398505	-0.101	0.0525282	-0.068
RGS12_ 3428557_ 3428711_ 3428089_ 3428169_ 3430406_ 3430955	SE	ENSG00000159788,19	RGS12	chr4	1	0.048	0.355247	-0.062	0.0327926	-0.109
RGS3_113565514_113565730_113565056_113565360_113583449_113584427	SE	ENSG00000138835,22	RGS3	chr9	0.0175856	0.458	0.738355	0.244	0.325221	-0.214
RHBDD1_226838072_226838154_226837547_226837770_226864603_226865065	SE	ENSG00000144468,16	RHBDD1	chr2	0.00245925	-0.514	NA	NA	NA	NA
RHBDD1_226839408_226839627_226838072_226838154_226864603_226864711	SE	ENSG00000144468,16	RHBDD1	chr2	0.0397465	0.239	NA	NA	0.0323328	-0.239
RHBDD3_ 29261199_ 29261425_ 29260325_ 29260613_ 29265478_ 29265668	SE	ENSG00000100263,13	RHBDD3	chr22	1	-0.33	1	0.126	0.0072771	0.456
RHBDL3_ 32284658_ 32284817_ 32266176_ 32266300_ 32288791_ 32289016	SE	ENSG00000141314,12	RHBDL3	chr17	0.00579849	-0.334	0.994212	-0.055	1	0.278
RHOBTB1_ 60872042_ 60872290_ 60871471_ 60871651_ 60874953_ 60875043	SE	ENSG00000072422,16	RHOBTB1	chr10	0.0122118	0.144	1	-0.004	0.304308	-0.148
RIC8B_106874480_106874567_106870822_106870942_106878986_106879125	SE	ENSG00000111785,19	RIC8B	chr12	1	0.336	0.0311512	-0.425	2.4262e-05	-0.761
RNASEH2B_ 50960144_ 50960171_ 50949462_ 50949505_ 50969931_ 50970363	SE	ENSG00000136104,20	RNASEH2B	chr13	1	-0.028	0.0227982	-0.14	0.010314	-0.111
RNF14_141978302_141978830_141974803_141974955_141980122_141980351	SE	ENSG00000013561,17	RNF14	chr5	0.656616	-0.093	0.0262009	-0.132	0.996753	-0.039
RNF146_127280515_127280604_127280230_127280340_127286049_127286177	SE	ENSG00000118518,15	RNF146	chr6	0.882971	-0.17	0.0206999	-0.455	0.406224	-0.285
RNF165_ 46450703_ 46450799_ 46450295_ 46450400_ 46455973_ 46456067	SE	ENSG00000141622,13	RNF165	chr18	0.212155	0.201	0.0343928	0.243	1	0.042
RNF175_153748644_153748827_153745668_153745727_153751437_153751447	SE	ENSG00000145428,14	RNF175	chr4	1	0.092	1	-0.168	0.0064973	-0.26
RNF185_ 31187046_ 31187270_ 31160192_ 31160303_ 31192683_ 31192702	SE	ENSG00000138942,15	RNF185	chr22	0.358766	0.098	0.582535	-0.034	0.00396857	-0.131
RNF34_121417503_121417911_121400040_121400218_121420241_121420334	SE	ENSG00000170633,16	RNF34	chr12	0.0112277	-0.144	0.00304962	-0.169	1	-0.025
RNF34_121417860_121417911_121400082_121400218_121420241_121420334	SE	ENSG00000170633,16	RNF34	chr12	0.024631	-0.095	0.0100383	-0.113	1	-0.017
RNGTT_ 88801563_ 88801632_ 88769773_ 88769874_ 88844356_ 88844521	SE	ENSG00000111880,15	RNGTT	chr6	0.043003	-0.174	0.0468506	-0.189	1	-0.014
ROBO2_ 77602934_ 77603060_ 77602209_ 77602491_ 77607797_ 77607954	SE	ENSG00000185008,17	ROBO2	chr3	0.177761	0.061	1	-0.068	0.0378814	-0.129
ROBO3_124877936_124878131_124877518_124877752_124878297_124878436	SE	ENSG00000154134,14	ROBO3	chr11	0.0867632	-0.212	1	-0.02	0.0343094	0.192
RPE_210018152_210018221_210017472_210017559_210019672_210019961	SE	ENSG00000197713,14	RPE	chr2	NA	NA	0.00848797	-0.405	1	-0.156
RPGRIP1L_ 53622218_ 53622356_ 53619024_ 53619208_ 53636438_ 53636512	SE	ENSG00000103494,13	RPGRIP1L	chr16	0.841969	0.084	0.446916	-0.352	0.0092621	-0.436
RPL17_ 49491735_ 49491833_ 49491531_ 49491584_ 49492274_ 49492399	SE	ENSG00000265681,7	RPL17	chr18	0.00132288	0.127	0.173458	0.076	0.523057	-0.051
RPRD1A_ 36040806_ 36040865_ 35993039_ 35993300_ 36067253_ 36067530	SE	ENSG00000141425,17	RPRD1A	chr18	0.0116435	0.472	NA	NA	NA	NA
RPS15_ 1439605_ 1439826_ 1438806_ 1438892_ 1440025_ 1440049	SE	ENSG00000115268,9	RPS15	chr19	0.429007	0.195	0.0206999	0.263	1	0.068
RPS6KC1_213071005_213071041_213051232_213051509_213077695_213077816	SE	ENSG00000136643,11	RPS6KC1	chr1	1	0.028	0.0353986	0.184	0.0397767	0.156
RSRC2_122513766_122513874_122511108_122511188_122514711_122514728	SE	ENSG00000111011,17	RSRC2	chr12	0.0127484	-0.372	0.0254059	-0.319	1	0.053
RSU1_ 16816972_ 16817084_ 16782033_ 16782084_ 16817314_ 16817528	SE	ENSG00000148484,17	RSU1	chr10	0.267683	-0.106	0.0265804	-0.135	1	-0.03
RUFY3_ 70794794_ 70794894_ 70789494_ 70789592_ 70800140_ 70800182	SE	ENSG00000018189,12	RUFY3	chr4	0.356893	0.141	NA	NA	0.0121166	-0.162
RWDD3_ 95246541_ 95246657_ 95244210_ 95244715_ 95246755_ 95247217	SE	ENSG00000122481,16	RWDD3	chr1	0.00823028	-0.111	1	-0.035	0.0777662	0.076
RWDD4_183655880_183655961_183650983_183651131_183658928_183659178	SE	ENSG00000182552,14	RWDD4	chr4	0.0913077	0.187	1	0.008	0.045428	-0.179
SBF2-AS1_ 9779816_ 9779942_ 9758300_ 9758503_ 9780375_ 9780575	SE	ENSG00000246273,7	SBF2-AS1	chr11	1	0.831	0.000321159	0.676	1	-0.155
SBF2_ 9992414_ 9992543_ 9989496_ 9989595_ 9992989_ 9993103	SE	ENSG00000133812,15	SBF2	chr11	1	-0.008	0.0140008	-0.161	0.0666801	-0.153
SCAF8_154741955_154742018_154733846_154733930_154773988_154774072	SE	ENSG00000213079,9	SCAF8	chr6	1	-0.047	0.0186172	-0.198	0.17635	-0.151
SCLT1_128965226_128965318_128959599_128959777_128970377_128970468	SE	ENSG00000151466,11	SCLT1	chr4	0.00192387	0.31	0.87371	0.071	0.179375	-0.238
SCMH1_ 41151613_ 41151684_ 41142877_ 41143112_ 41160874_ 41160898	SE	ENSG00000010803,16	SCMH1	chr1	0.0427383	0.254	1	0.007	0.0418508	-0.247
SCN1A_166002471_166002753_165999722_165999776_166009718_166009841	SE	ENSG00000144285,19	SCN1A	chr2	1	0.055	0.0452549	0.166	0.0573257	0.11
SCN1A_166007229_166007293_165999722_165999776_166009718_166009841	SE	ENSG00000144285,19	SCN1A	chr2	1	0.105	0.00483904	0.394	1	0.289
SCNN1D_ 1285570_ 1285664_ 1283977_ 1284090_ 1285925_ 1286278	SE	ENSG00000162572,20	SCNN1D	chr1	0.0434794	0.197	0.0106499	0.23	1	0.034
SCNN1D_ 1290270_ 1290388_ 1287938_ 1288037_ 1290476_ 1290555	SE	ENSG00000162572,20	SCNN1D	chr1	0.201868	-0.132	0.00054854	-0.247	1	-0.115
SCRN3_174398274_174398442_174395729_174395817_174399921_174400103	SE	ENSG00000144306,14	SCRN3	chr2	1	-0.023	0.0123097	-0.127	0.050075	-0.104
SCRN3_174398365_174398442_174395744_174395817_174399921_174400103	SE	ENSG00000144306,14	SCRN3	chr2	1	-0.029	0.0107241	-0.152	0.0486542	-0.123
SEC11A_ 84687624_ 84687774_ 84670724_ 84670782_ 84716024_ 84716063	SE	ENSG00000140612,13	SEC11A	chr15	0.00151504	-0.196	0.399191	-0.12	0.245189	0.076
SEC31A_ 82861630_ 82861708_ 82857688_ 82857764_ 82862533_ 82862572	SE	ENSG00000138674,16	SEC31A	chr4	0.00538891	0.164	1	0.01	0.00757576	-0.154
SEC31B_100500109_100500159_100499523_100499598_100502253_100502484	SE	ENSG00000075826,16	SEC31B	chr10	1	0.116	0.671442	-0.262	0.0448133	-0.378
SEMA4F_ 74657852_ 74657951_ 74657564_ 74657624_ 74662731_ 74662825	SE	ENSG00000135622,12	SEMA4F	chr2	0.0196436	0.413	0.156077	0.285	1	-0.128
SEMA6C_151137985_151138105_151137710_151137799_151138315_151138406	SE	ENSG00000143434,15	SEMA6C	chr1	0.749599	0.091	1	-0.078	0.0452727	-0.17
SEMA6C_151138315_151138406_151137985_151138105_151138629_151138731	SE	ENSG00000143434,15	SEMA6C	chr1	0.714008	0.086	0.0115294	0.196	1	0.11
SENP1_ 48101468_ 48101516_ 48097736_ 48098124_ 48106027_ 48106046	SE	ENSG00000079387,13	SENP1	chr12	0.221358	0.124	1	-0.012	0.0168251	-0.137
SENP5_196927795_196927879_196903532_196903610_196929632_196929683	SE	ENSG00000119231,10	SENP5	chr3	0.00144703	-0.178	1	-0.11	0.164959	0.068
SEPT10_109593050_109593119_109585125_109585321_109613797_109613835	SE	ENSG00000186522,14	SEPT10	chr2	1	0.154	1	-0.026	0.00227992	-0.181
SEPT7-AS1_ 35755732_ 35755817_ 35755145_ 35755195_ 35758178_ 35758273	SE	ENSG00000228878,7	SEPT7-AS1	chr7	0.000865288	-0.51	0.00726679	-0.356	1	0.154
SEPT7P2_ 45724352_ 45725715_ 45723786_ 45724023_ 45726183_ 45726236	SE	ENSG00000214765,8	SEPT7P2	chr7	1	0.252	2.22942e-05	0.762	0.175291	0.51
SERGEF_ 17878207_ 17878244_ 17788047_ 17788413_ 17988596_ 17988755	SE	ENSG00000129158,10	SERGEF	chr11	0.0221707	0.14	NA	NA	0.0191559	-0.14
SERGEF_ 18004440_ 18004535_ 18000496_ 18000557_ 18006590_ 18006746	SE	ENSG00000129158,10	SERGEF	chr11	0.140883	0.124	1	-0.009	0.0138002	-0.133
SERPINB6_ 2968778_ 2968913_ 2959167_ 2959342_ 2971116_ 2971276	SE	ENSG00000124570,19	SERPINB6	chr6	0.0434794	-0.103	0.0145076	-0.092	1	0.011
SERPINH1_ 75563726_ 75563770_ 75562345_ 75562378_ 75566315_ 75566801	SE	ENSG00000149257,14	SERPINH1	chr11	1	-0.535	0.0353099	-0.405	1	0.13
SETD9_ 56911041_ 56911111_ 56910086_ 56910394_ 56913010_ 56913134	SE	ENSG00000155542,11	SETD9	chr5	1	-0.059	0.00396449	0.41	0.00733349	0.469
SETD9_ 56911308_ 56911536_ 56910104_ 56910394_ 56913010_ 56913134	SE	ENSG00000155542,11	SETD9	chr5	0.984433	-0.144	1	0.109	0.0285001	0.253
SEZ6L2_ 29879863_ 29880064_ 29878286_ 29878425_ 29885585_ 29885749	SE	ENSG00000174938,14	SEZ6L2	chr16	1	-0.057	0.131524	0.206	0.0392506	0.263
SFI1_ 31603743_ 31603819_ 31602606_ 31602785_ 31604308_ 31604404	SE	ENSG00000198089,15	SFI1	chr22	0.0679522	-0.119	0.0290296	-0.139	1	-0.02
SFXN2_102724935_102724996_102714635_102714681_102726611_102726797	SE	ENSG00000156398,12	SFXN2	chr10	0.0517578	-0.204	NA	NA	0.0426488	0.204
SFXN5_ 72968447_ 72968533_ 72961130_ 72961248_ 72988257_ 72988348	SE	ENSG00000144040,12	SFXN5	chr2	0.20972	0.193	0.6398	-0.09	6.21667e-05	-0.283
SFXN5_ 72971569_ 72971685_ 72961130_ 72961248_ 72988257_ 72988348	SE	ENSG00000144040,12	SFXN5	chr2	0.200817	0.135	0.81785	-0.072	8.04778e-05	-0.207
SH3YL1_ 243502_ 243562_ 242797_ 242871_ 247537_ 247602	SE	ENSG00000035115,21	SH3YL1	chr2	0.0266988	0.305	0.0206999	0.158	1	-0.147
SH3YL1_ 260084_ 261130_ 253004_ 253115_ 262630_ 262786	SE	ENSG00000035115,21	SH3YL1	chr2	0.0270676	-0.289	0.027017	-0.277	1	0.012
SHMT1_ 18360413_ 18360552_ 18355978_ 18356000_ 18363371_ 18363542	SE	ENSG00000176974,19	SHMT1	chr17	1	-0.085	0.484818	0.086	0.0321316	0.172
SHROOM3_ 76555608_ 76555763_ 76435099_ 76436220_ 76710155_ 76710287	SE	ENSG00000138771,15	SHROOM3	chr4	1	-0.047	0.00072441	-0.122	0.100294	-0.075
SIGIRR_ 406842_ 406993_ 405871_ 406538_ 407061_ 407164	SE	ENSG00000185187,12	SIGIRR	chr11	0.22548	-0.295	1	0.163	0.00542221	0.458
SIMC1_176289653_176290955_176238490_176238637_176295029_176295262	SE	ENSG00000170085,17	SIMC1	chr5	1	0.026	0.0140008	-0.246	0.0074628	-0.273
SIRT3_ 218777_ 219041_ 216144_ 216718_ 224077_ 224239	SE	ENSG00000142082,14	SIRT3	chr11	0.0019779	0.17	1	0.015	0.00300925	-0.154
SIRT3_ 218831_ 219041_ 215457_ 216718_ 224077_ 224239	SE	ENSG00000142082,14	SIRT3	chr11	0.00661322	0.107	1	0.009	0.00829609	-0.098
SIX5_ 45766349_ 45767155_ 45764784_ 45766111_ 45768041_ 45768851	SE	ENSG00000177045,8	SIX5	chr19	1	-0.031	0.0006639	0.305	2.30985e-05	0.336
SKA3_ 21172338_ 21172504_ 21159901_ 21159987_ 21176374_ 21176548	SE	ENSG00000165480,15	SKA3	chr13	0.00256924	0.474	1	0.205	0.156857	-0.269
SLC12A4_ 67950653_ 67951060_ 67950318_ 67950493_ 67951139_ 67951304	SE	ENSG00000124067,16	SLC12A4	chr16	0.0319493	-0.181	0.348876	-0.144	1	0.037
SLC12A4_ 67961574_ 67961706_ 67952183_ 67952425_ 67968438_ 67968584	SE	ENSG00000124067,16	SLC12A4	chr16	1	-0.42	0.00726679	-0.519	1	-0.099
SLC12A9_100854155_100854378_100826819_100827047_100856867_100857176	SE	ENSG00000146828,17	SLC12A9	chr7	0.00663483	0.641	1	0.303	1	-0.338
SLC16A4_110378852_110379356_110376949_110377161_110380981_110381143	SE	ENSG00000168679,17	SLC16A4	chr1	1	-0.032	0.029226	-0.446	0.0877451	-0.414
SLC19A2_169477154_169477757_169469963_169470186_169485562_169485941	SE	ENSG00000117479,13	SLC19A2	chr1	1.65125e-05	0.49	NA	NA	1.16336e-05	-0.49
SLC20A2_ 42535171_ 42535335_ 42472305_ 42472654_ 42541537_ 42541581	SE	ENSG00000168575,9	SLC20A2	chr8	1	-0.069	0.00567657	-0.593	0.0423386	-0.524
SLC23A2_ 4970792_ 4970915_ 4932454_ 4932716_ 5001405_ 5001499	SE	ENSG00000089057,14	SLC23A2	chr20	0.00146412	0.25	NA	NA	0.00162683	-0.25
SLC23A2_ 4970792_ 4970919_ 4932454_ 4932716_ 5001405_ 5001499	SE	ENSG00000089057,14	SLC23A2	chr20	0.00143748	0.227	NA	NA	0.00169154	-0.227
SLC24A1_ 65638127_ 65638181_ 65623954_ 65625970_ 65639594_ 65639703	SE	ENSG00000074621,13	SLC24A1	chr15	0.0751262	0.254	1	-0.044	0.000729459	-0.298
SLC25A29_100295625_100295993_100293293_100293377_100298841_100298885	SE	ENSG00000197119,12	SLC25A29	chr14	0.0584038	0.112	0.350028	-0.121	0.00012079	-0.233
SLC25A29_100298841_100298885_100293293_100293377_100306198_100306515	SE	ENSG00000197119,12	SLC25A29	chr14	0.00337717	0.203	1	-0.013	4.55387e-05	-0.216
SLC25A33_ 9570257_ 9570358_ 9567283_ 9567361_ 9573345_ 9573412	SE	ENSG00000171612,6	SLC25A33	chr1	1	-0.013	0.0125333	0.107	0.00393953	0.12
SLC25A43_119406459_119406701_119399059_119399678_119410189_119410362	SE	ENSG00000077713,18	SLC25A43	chrX	0.689605	0.163	1	-0.071	0.00225939	-0.234
SLC25A45_ 65379375_ 65379561_ 65376817_ 65377076_ 65379866_ 65379938	SE	ENSG00000162241,12	SLC25A45	chr11	0.0402425	0.206	0.117387	0.177	1	-0.029
SLC29A1_ 44226060_ 44226167_ 44219635_ 44219782_ 44227259_ 44227342	SE	ENSG00000112759,17	SLC29A1	chr6	0.115125	0.214	0.049225	0.682	0.514215	0.468
SLC29A1_ 44226060_ 44226167_ 44223558_ 44223641_ 44227259_ 44227342	SE	ENSG00000112759,17	SLC29A1	chr6	0.0266988	0.264	1	0.052	0.0836863	-0.212
SLC2A8_127397904_127398111_127397375_127397538_127399906_127400006	SE	ENSG00000136856,17	SLC2A8	chr9	0.143812	-0.089	0.0308871	-0.136	1	-0.047
SLC35B3_ 8434384_ 8434430_ 8429863_ 8430157_ 8435342_ 8435611	SE	ENSG00000124786,11	SLC35B3	chr6	1	-0.071	0.000477067	-0.238	0.0353139	-0.168
SLC37A4_119027627_119027770_119026936_119027095_119028193_119028426	SE	ENSG00000137700,18	SLC37A4	chr11	0.000275791	0.605	NA	NA	1	-0.605
SLC37A4_119027627_119027872_119026665_119027095_119028193_119028426	SE	ENSG00000137700,18	SLC37A4	chr11	5.65535e-05	0.62	NA	NA	1	-0.62
SLC38A1_ 46243199_ 46243314_ 46229563_ 46229639_ 46268525_ 46269012	SE	ENSG00000111371,15	SLC38A1	chr12	1	0.059	1	-0.042	0.0252311	-0.101
SLC38A9_ 55627890_ 55627980_ 55625844_ 55626659_ 55633753_ 55633902	SE	ENSG00000177058,11	SLC38A9	chr5	NA	NA	0.0100383	0.205	0.00759473	0.205
SLC41A2_104931631_104931791_104928299_104928694_104958189_104958319	SE	ENSG00000136052,9	SLC41A2	chr12	0.000353268	-0.567	1	0.283	1	0.851
SLC41A2_104931631_104931791_104928299_104928694_104958600_104958698	SE	ENSG00000136052,9	SLC41A2	chr12	0.00033759	-0.761	1	-0.941	1	-0.18
SLC46A1_ 28400609_ 28400766_ 28394755_ 28399713_ 28404615_ 28405468	SE	ENSG00000076351,12	SLC46A1	chr17	1	-0.095	0.0365355	-0.434	0.0188739	-0.339
SLC47A1_ 19571477_ 19571572_ 19567095_ 19567228_ 19572779_ 19572861	SE	ENSG00000142494,13	SLC47A1	chr17	0.00590651	-0.54	0.451577	-0.341	0.0676925	0.199
SLC6A9_ 44009964_ 44010096_ 44008352_ 44008623_ 44024247_ 44024362	SE	ENSG00000196517,11	SLC6A9	chr1	0.095308	0.082	1	-0.057	0.0198949	-0.139
SLC7A6_ 68273817_ 68273904_ 68266592_ 68266721_ 68274690_ 68274811	SE	ENSG00000103064,14	SLC7A6	chr16	0.268387	-0.408	0.123244	0.189	0.00109704	0.596
SLC7A6_ 68273821_ 68273904_ 68266601_ 68266721_ 68274690_ 68275001	SE	ENSG00000103064,14	SLC7A6	chr16	0.303638	-0.389	0.989922	0.059	0.0373844	0.448
SLC9A8_ 49850761_ 49850844_ 49849578_ 49849680_ 49855437_ 49855581	SE	ENSG00000197818,11	SLC9A8	chr20	0.842055	-0.148	0.461332	0.119	0.00336405	0.267
SLC9B1_102945192_102945320_102932123_102932299_102991642_102991712	SE	ENSG00000164037,16	SLC9B1	chr4	0.043003	-0.598	0.379911	-0.412	1	0.185
SMAD2_ 47920071_ 47920169_ 47896520_ 47896809_ 47930799_ 47931146	SE	ENSG00000175387,15	SMAD2	chr18	0.021449	-0.276	0.181471	-0.227	1	0.049
SMARCA2_ 2159813_ 2159909_ 2158448_ 2158594_ 2161000_ 2161035	SE	ENSG00000080503,23	SMARCA2	chr9	0.00388907	0.253	NA	NA	0.00252524	-0.253
SMC1A_ 53414757_ 53414870_ 53413231_ 53413435_ 53422491_ 53422728	SE	ENSG00000072501,17	SMC1A	chrX	0.212155	-0.066	0.000915061	-0.111	NA	NA
SMG7_183512836_183512868_183472215_183472649_183515873_183515894	SE	ENSG00000116698,21	SMG7	chr1	1	-0.021	0.0408968	-0.131	0.067311	-0.11
SMUG1_ 54188514_ 54188596_ 54181456_ 54183959_ 54188950_ 54188972	SE	ENSG00000123415,15	SMUG1	chr12	1	-0.245	0.0321359	-0.168	1	0.077
SNAP47_227731584_227731747_227728538_227728786_227758994_227759485	SE	ENSG00000143740,14	SNAP47	chr1	1	-0.359	0.0231959	-0.52	1	-0.161
SNX10_ 26357006_ 26357127_ 26354056_ 26354184_ 26360974_ 26361031	SE	ENSG00000086300,15	SNX10	chr7	0.0458822	-0.3	0.00150486	-0.348	1	-0.048
SNX14_ 85538837_ 85538864_ 85536791_ 85536924_ 85541984_ 85542043	SE	ENSG00000135317,12	SNX14	chr6	0.741141	0.129	0.0621177	-0.121	0.00127683	-0.249
SNX16_ 81840197_ 81840443_ 81839611_ 81840082_ 81842121_ 81842217	SE	ENSG00000104497,13	SNX16	chr8	1	-0.062	0.024589	-0.166	0.100973	-0.104
SNX22_ 64152242_ 64152326_ 64151716_ 64151850_ 64152637_ 64152742	SE	ENSG00000157734,13	SNX22	chr15	0.834205	-0.286	0.00128686	-0.513	0.0787334	-0.228
SOBP_107633513_107635469_107587079_107587175_107658206_107660167	SE	ENSG00000112320,11	SOBP	chr6	NA	NA	0.00362193	0.395	0.0027223	0.395
SON_ 33571750_ 33571788_ 33568970_ 33569087_ 33572550_ 33572630	SE	ENSG00000159140,19	SON	chr21	0.0757516	0.075	1	-0.076	0.00238187	-0.151
SOX5_ 23949563_ 23949661_ 23895897_ 23896024_ 23950868_ 23951032	SE	ENSG00000134532,16	SOX5	chr12	0.0255203	0.138	0.0150227	0.223	1	0.086
SP110_230202578_230202722_230200884_230200965_230207990_230208059	SE	ENSG00000135899,17	SP110	chr2	0.170041	0.145	1	-0.072	0.0136435	-0.217
SP110_230202578_230202728_230200467_230200965_230207990_230208059	SE	ENSG00000135899,17	SP110	chr2	0.186665	0.105	1	-0.053	0.0358069	-0.158
SPAG1_100239239_100239404_100233170_100233537_100240402_100240515	SE	ENSG00000104450,12	SPAG1	chr8	1	-0.149	0.209056	0.095	0.0261787	0.244
SPATA18_ 52060418_ 52060524_ 52051330_ 52051791_ 52071916_ 52072032	SE	ENSG00000163071,10	SPATA18	chr4	0.00724679	-0.363	0.0944497	-0.343	NA	NA
SPATA18_ 52062219_ 52062332_ 52060781_ 52060897_ 52071916_ 52072156	SE	ENSG00000163071,10	SPATA18	chr4	0.0258433	0.161	1	0.007	0.338212	-0.154
SPATA18_ 52069820_ 52069916_ 52051415_ 52051791_ 52071916_ 52072013	SE	ENSG00000163071,10	SPATA18	chr4	0.0473345	-0.35	0.240116	-0.361	1	-0.011
SPATA18_ 52069820_ 52069916_ 52060781_ 52060897_ 52071916_ 52072013	SE	ENSG00000163071,10	SPATA18	chr4	0.0171007	0.371	NA	NA	0.810311	-0.234
SPATA20_ 50549285_ 50549487_ 50548809_ 50549186_ 50549984_ 50550115	SE	ENSG00000006282,20	SPATA20	chr17	1	0.002	0.0277129	-0.12	0.0846865	-0.123
SPATA6_ 48411463_ 48411588_ 48399051_ 48399644_ 48452993_ 48453131	SE	ENSG00000132122,11	SPATA6	chr1	0.0751262	-0.15	0.00900089	-0.222	1	-0.072
SPDYA_ 28788657_ 28788809_ 28783906_ 28783978_ 28799198_ 28799299	SE	ENSG00000163806,15	SPDYA	chr2	0.358541	-0.057	0.000334576	-0.111	NA	NA
SPEN_ 15876201_ 15876678_ 15872815_ 15873136_ 15909320_ 15909481	SE	ENSG00000065526,10	SPEN	chr1	0.00992228	0.186	1	-0.032	0.000933255	-0.218
SPIN1_ 88415606_ 88415699_ 88388430_ 88388538_ 88416643_ 88416766	SE	ENSG00000106723,16	SPIN1	chr9	0.0254969	-0.667	1	-0.667	NA	NA
SPNS1_ 28981900_ 28982056_ 28981454_ 28981615_ 28982355_ 28982545	SE	ENSG00000169682,17	SPNS1	chr16	0.293704	-0.05	0.722448	0.067	0.00327566	0.117
SPRYD7_ 49931017_ 49931134_ 49927918_ 49928085_ 49936129_ 49936340	SE	ENSG00000123178,14	SPRYD7	chr13	0.0137342	-0.107	1	-0.009	0.0304946	0.098
SPTAN1_128609650_128609665_128609121_128609284_128611713_128611845	SE	ENSG00000197694,15	SPTAN1	chr9	0.00132462	0.142	1	-0.046	1.91377e-05	-0.188
SRC_ 37382618_ 37382786_ 37365203_ 37365277_ 37384149_ 37384403	SE	ENSG00000197122,11	SRC	chr20	0.000522784	-0.196	0.355247	-0.11	1	0.086
SREBF2_ 41899236_ 41899553_ 41898648_ 41898781_ 41900019_ 41900122	SE	ENSG00000198911,11	SREBF2	chr22	1	0.267	1	-0.352	0.0255177	-0.619
SSPO_149782846_149783022_149782181_149782299_149783106_149783334	SE	ENSG00000197558,11	SSPO	chr7	0.000639601	-0.571	1	-0.238	0.28747	0.333
SSPO_149822511_149822679_149821861_149822197_149823351_149823482	SE	ENSG00000197558,11	SSPO	chr7	1	-0.497	0.0106561	-0.348	1	0.149
SSX2IP_ 84671176_ 84671308_ 84670645_ 84670815_ 84690370_ 84690545	SE	ENSG00000117155,16	SSX2IP	chr1	0.0101267	0.166	1	0.047	1	-0.119
SSX2IP_ 84680337_ 84680387_ 84670645_ 84670815_ 84690370_ 84690545	SE	ENSG00000117155,16	SSX2IP	chr1	0.0234441	0.667	1	0.667	NA	NA
ST3GAL3_ 43921442_ 43921638_ 43920781_ 43920928_ 43930131_ 43931057	SE	ENSG00000126091,20	ST3GAL3	chr1	0.124083	-0.09	1	0.018	0.00244237	0.108
ST3GAL5_ 85844395_ 85844521_ 85839205_ 85840392_ 85846376_ 85846563	SE	ENSG00000115525,17	ST3GAL5	chr2	1	0.011	0.0206999	0.262	0.0510752	0.25
ST3GAL5_ 85844395_ 85844554_ 85837119_ 85840392_ 85846376_ 85846424	SE	ENSG00000115525,17	ST3GAL5	chr2	1	-0.002	0.0479705	0.167	0.0392506	0.169
ST3GAL6_ 98784944_ 98785040_ 98773919_ 98773983_ 98793674_ 98793944	SE	ENSG00000064225,12	ST3GAL6	chr3	0.741863	0.104	0.395841	-0.082	0.012367	-0.186
ST5_ 8831555_ 8831688_ 8811246_ 8811335_ 8870953_ 8871088	SE	ENSG00000166444,18	ST5	chr11	0.239417	-0.186	0.0454391	-0.553	0.918632	-0.367
ST6GALNAC6_127897825_127898010_127896241_127896332_127899502_127899535	SE	ENSG00000160408,14	ST6GALNAC6	chr9	0.453661	0.049	0.0212296	-0.134	1.77086e-05	-0.183
ST7_117098612_117098815_117014935_117015014_117099761_117099844	SE	ENSG00000004866,20	ST7	chr7	0.00864556	-0.591	0.45091	-0.28	0.0715853	0.311
STAC3_ 57244536_ 57244622_ 57244314_ 57244366_ 57244915_ 57244965	SE	ENSG00000185482,7	STAC3	chr12	0.0349314	-0.512	0.0327195	-0.512	NA	NA
STAU2_ 73709031_ 73709162_ 73673138_ 73673242_ 73738283_ 73738344	SE	ENSG00000040341,17	STAU2	chr8	0.0197797	-0.513	0.000104401	-0.567	1	-0.054
STK33_ 8480533_ 8480614_ 8474792_ 8475066_ 8594082_ 8594160	SE	ENSG00000130413,15	STK33	chr11	0.000519912	-0.507	1	-0.174	0.24301	0.333
STOML1_ 73984658_ 73984868_ 73983205_ 73984130_ 73985317_ 73985513	SE	ENSG00000067221,13	STOML1	chr15	1	-0.062	0.0244172	-0.242	0.0923029	-0.18
STOML1_ 73984658_ 73984871_ 73978922_ 73984130_ 73985317_ 73985513	SE	ENSG00000067221,13	STOML1	chr15	1	-0.078	0.0271308	-0.215	0.114595	-0.137
STRA6LP_ 97291370_ 97291487_ 97290853_ 97290902_ 97307735_ 97307806	SE	ENSG00000255036,6	STRA6LP	chr9	0.0126822	0.472	0.122698	0.272	1	-0.2
STRA6LP_ 97343339_ 97343563_ 97330321_ 97330767_ 97347313_ 97347489	SE	ENSG00000255036,6	STRA6LP	chr9	0.00974651	0.329	0.729949	0.171	1	-0.158
STX16_ 58667200_ 58667318_ 58652096_ 58652138_ 58667489_ 58667597	SE	ENSG00000124222,22	STX16	chr20	0.0271697	0.23	0.0115294	0.26	NA	NA
SUMF2_ 56074585_ 56074639_ 56074173_ 56074218_ 56076833_ 56076889	SE	ENSG00000129103,17	SUMF2	chr7	1	0.028	0.181471	-0.072	0.00507801	-0.101
SUZ12P1_ 30743300_ 30743369_ 30735032_ 30735097_ 30759490_ 30759539	SE	ENSG00000264538,6	SUZ12P1	chr17	0.153058	-0.128	1	0.095	0.00265775	0.223
SUZ12P1_ 30787438_ 30787661_ 30784645_ 30784892_ 30790637_ 30790908	SE	ENSG00000264538,6	SUZ12P1	chr17	0.623576	0.224	0.0429228	-0.604	5.55618e-07	-0.828
SVIL_ 29532528_ 29533458_ 29532001_ 29532172_ 29550596_ 29551263	SE	ENSG00000197321,14	SVIL	chr10	NA	NA	2.15535e-05	0.587	1.77479e-05	0.587
SVIL_ 29535988_ 29536069_ 29532001_ 29532172_ 29550596_ 29551263	SE	ENSG00000197321,14	SVIL	chr10	NA	NA	0.0116839	0.343	0.0092621	0.343
SYNE1_152300640_152300781_152293959_152294127_152301868_152302063	SE	ENSG00000131018,22	SYNE1	chr6	0.00719593	-0.667	0.00667697	-0.667	NA	NA
SYNE2_ 63995043_ 63995202_ 63993834_ 63993969_ 63996946_ 63997158	SE	ENSG00000054654,16	SYNE2	chr14	0.0804139	0.107	1	-0.016	0.0363944	-0.123
SYNJ2BP_ 70388469_ 70388606_ 70375675_ 70375771_ 70416899_ 70417045	SE	ENSG00000213463,4	SYNJ2BP	chr14	0.568759	-0.107	1	0.078	0.0398212	0.184
SYTL4_100704810_100704886_100703092_100703185_100732003_100732123	SE	ENSG00000102362,15	SYTL4	chrX	0.000856567	-0.484	0.156857	-0.271	0.038784	0.213
SYTL5_ 38103025_ 38103091_ 38102341_ 38102434_ 38106592_ 38106771	SE	ENSG00000147041,11	SYTL5	chrX	0.00016423	0.185	0.325543	0.133	0.252047	-0.052
TACC3_ 1727707_ 1728787_ 1723727_ 1723870_ 1730886_ 1730962	SE	ENSG00000013810,18	TACC3	chr4	1	0.069	0.00578047	0.221	0.0953589	0.152
TADA2A_ 37423508_ 37423615_ 37411268_ 37411390_ 37426949_ 37427009	SE	ENSG00000276234,4	TADA2A	chr17	0.0394618	0.103	0.0343928	0.112	1	0.009
TADA2A_ 37423508_ 37423615_ 37411268_ 37411390_ 37437737_ 37437955	SE	ENSG00000276234,4	TADA2A	chr17	0.00186197	0.176	1	-0.012	0.000565431	-0.188
TADA2A_ 37426949_ 37427009_ 37411268_ 37411390_ 37437737_ 37437829	SE	ENSG00000276234,4	TADA2A	chr17	0.00559581	0.473	1	-0.111	5.61878e-06	-0.585
TAF1_ 71459149_ 71459251_ 71458240_ 71458357_ 71459551_ 71459708	SE	ENSG00000147133,15	TAF1	chrX	0.0158086	0.183	1	0.075	0.192815	-0.108
TANGO2_ 20053359_ 20053551_ 20052464_ 20052584_ 20055942_ 20056013	SE	ENSG00000183597,15	TANGO2	chr22	0.0117489	-0.213	0.703535	-0.114	0.621097	0.099
TARBP2_ 53502019_ 53502184_ 53501365_ 53501461_ 53503026_ 53503129	SE	ENSG00000139546,10	TARBP2	chr12	0.07212	0.105	1	-0.02	0.00156767	-0.126
TARBP2_ 53502059_ 53502184_ 53501305_ 53501461_ 53503026_ 53503212	SE	ENSG00000139546,10	TARBP2	chr12	0.0640909	0.092	1	-0.019	0.00172897	-0.11
TATDN1_124518741_124518881_124515886_124516030_124522936_124523002	SE	ENSG00000147687,18	TATDN1	chr8	1	0.192	0.0291687	0.264	0.6998	0.071
TBC1D1_ 38051898_ 38052060_ 38049617_ 38049898_ 38053105_ 38053225	SE	ENSG00000065882,15	TBC1D1	chr4	0.00719593	0.289	NA	NA	0.00545427	-0.289
TBC1D31_123142261_123142456_123140760_123140901_123144716_123144855	SE	ENSG00000156787,16	TBC1D31	chr8	0.0100175	-0.238	4.27776e-05	-0.282	1	-0.044
TBCD_ 82900650_ 82900731_ 82893546_ 82893632_ 82911757_ 82911765	SE	ENSG00000141556,20	TBCD	chr17	1	-0.034	0.219234	0.108	0.00442075	0.142
TBCEL_121036504_121036612_121024112_121024291_121045673_121045823	SE	ENSG00000154114,12	TBCEL	chr11	1	-0.009	0.0245109	-0.268	0.103914	-0.259
TBL1XR1_177079826_177079945_177053772_177053918_177098465_177098541	SE	ENSG00000177565,16	TBL1XR1	chr3	0.00410753	-0.381	0.179813	-0.393	1	-0.013
TBX2-AS1_ 61394621_ 61394738_ 61393457_ 61393747_ 61399238_ 61399370	SE	ENSG00000267280,5	TBX2-AS1	chr17	0.689679	-0.241	0.933142	0.001	0.0339512	0.242
TCF25_ 89887651_ 89887681_ 89885847_ 89885966_ 89892192_ 89892275	SE	ENSG00000141002,19	TCF25	chr16	0.543727	-0.06	0.0257301	-0.107	0.753854	-0.047
TCFL5_ 62854015_ 62854157_ 62841114_ 62842097_ 62860124_ 62860308	SE	ENSG00000101190,12	TCFL5	chr20	0.602581	-0.176	0.00626822	-0.25	0.211522	-0.074
TCFL5_ 62859363_ 62859526_ 62841114_ 62842097_ 62860124_ 62860308	SE	ENSG00000101190,12	TCFL5	chr20	0.499246	-0.074	0.00358745	-0.127	0.385334	-0.053
TCTN1_110644966_110645129_110640445_110640517_110647195_110647336	SE	ENSG00000204852,15	TCTN1	chr12	0.891779	-0.389	0.0019356	-0.57	0.340479	-0.181
TDP1_ 89956577_ 89956800_ 89956036_ 89956278_ 89963107_ 89963552	SE	ENSG00000042088,13	TDP1	chr14	1	-0.13	3.95255e-05	-0.388	0.00772223	-0.258
TDRD3_ 60439687_ 60439772_ 60397292_ 60397405_ 60444682_ 60444748	SE	ENSG00000083544,14	TDRD3	chr13	0.0243879	-0.259	0.00894629	-0.298	1	-0.039
TENM2_168126753_168126966_168124849_168125050_168162610_168162757	SE	ENSG00000145934,16	TENM2	chr5	0.00157149	-0.269	0.00245871	-0.246	1	0.023
TENM3_182680542_182680737_182680247_182680349_182681813_182682014	SE	ENSG00000218336,8	TENM3	chr4	0.56722	0.103	0.437688	-0.093	0.000551157	-0.196
TEP1_ 20372732_ 20372857_ 20371488_ 20371632_ 20373010_ 20373100	SE	ENSG00000129566,12	TEP1	chr14	0.809971	0.134	1	-0.057	0.044569	-0.191
TEX9_ 56383951_ 56384031_ 56373440_ 56373504_ 56412301_ 56412436	SE	ENSG00000151575,14	TEX9	chr15	0.945042	-0.172	1	0.113	0.00353036	0.285
TFDP1_113631622_113631905_113610995_113611062_113633119_113633285	SE	ENSG00000198176,12	TFDP1	chr13	0.0258433	-0.194	1	0.065	0.204681	0.258
TFDP1_113637619_113637896_113636533_113636700_113640119_113640310	SE	ENSG00000198176,12	TFDP1	chr13	0.172553	-0.153	0.000695066	-0.273	0.263913	-0.119
TFDP1_113637817_113637896_113636533_113636700_113640119_113640684	SE	ENSG00000198176,12	TFDP1	chr13	0.0487838	-0.067	5.48521e-06	-0.104	0.212071	-0.037
TFPI_187520541_187520613_187513615_187513646_187554199_187554351	SE	ENSG00000003436,15	TFPI	chr2	0.0101465	0.233	0.947589	0.122	0.407709	-0.111
THAP6_ 75514869_ 75514991_ 75514217_ 75514520_ 75515432_ 75515532	SE	ENSG00000174796,12	THAP6	chr4	1	0.005	0.0327195	-0.188	0.013566	-0.193
THAP9_ 82905860_ 82905926_ 82904735_ 82904941_ 82906323_ 82906627	SE	ENSG00000168152,12	THAP9	chr4	0.0113858	-0.767	1	-1	1	-0.233
THOC5_ 29550727_ 29550843_ 29549051_ 29549158_ 29553447_ 29553655	SE	ENSG00000100296,13	THOC5	chr22	0.114976	0.125	1	-0.032	0.0227527	-0.157
TIRAP_126291424_126291569_126290802_126290961_126292476_126292687	SE	ENSG00000150455,13	TIRAP	chr11	0.0243879	-0.193	0.871326	-0.116	1	0.077
TLE4_ 79707122_ 79707218_ 79705888_ 79705942_ 79708117_ 79708250	SE	ENSG00000106829,18	TLE4	chr9	1	0.092	0.00352149	0.191	0.855394	0.098
TLE6_ 2987355_ 2987372_ 2986982_ 2987238_ 2987723_ 2987790	SE	ENSG00000104953,19	TLE6	chr19	0.0177907	-0.25	0.0395066	-0.206	1	0.044
TM7SF3_ 26980565_ 26980646_ 26975495_ 26975658_ 26995236_ 26995268	SE	ENSG00000064115,10	TM7SF3	chr12	0.0934014	-0.58	1	-0.203	0.0380704	0.376
TMCC1_129838897_129839060_129832773_129832826_129880308_129880562	SE	ENSG00000172765,17	TMCC1	chr3	0.111986	-0.06	0.0357212	-0.105	1	-0.045
TMCO3_113534044_113534240_113520615_113520733_113547299_113547379	SE	ENSG00000150403,17	TMCO3	chr13	1	0.015	0.0173944	0.119	NA	NA
TMEM11_ 21210935_ 21211227_ 21197953_ 21198840_ 21214090_ 21214161	SE	ENSG00000178307,9	TMEM11	chr17	0.453761	0.077	0.783025	-0.089	0.0320787	-0.165
TMEM126B_ 85631144_ 85631316_ 85629131_ 85629262_ 85631686_ 85631791	SE	ENSG00000171204,12	TMEM126B	chr11	1	0.025	0.0178802	0.196	0.01141	0.171
TMEM143_ 48360071_ 48360176_ 48345159_ 48345354_ 48363290_ 48363531	SE	ENSG00000161558,10	TMEM143	chr19	1	-0.048	0.0885166	-0.353	0.0337737	-0.304
TMEM143_ 48360071_ 48360183_ 48345159_ 48345354_ 48363290_ 48363674	SE	ENSG00000161558,10	TMEM143	chr19	0.65454	-0.051	0.0335912	-0.473	0.0031209	-0.422
TMEM159_ 21174009_ 21174148_ 21170436_ 21170605_ 21179474_ 21179612	SE	ENSG00000011638,10	TMEM159	chr16	1	0.079	1	-0.14	0.0323328	-0.219
TMEM177_119680831_119681123_119679202_119679276_119685657_119686507	SE	ENSG00000144120,12	TMEM177	chr2	0.033112	-0.408	0.655006	-0.22	1	0.188
TMEM198B_ 55832870_ 55833014_ 55831256_ 55831349_ 55833446_ 55833541	SE	ENSG00000182796,14	TMEM198B	chr12	1	-0.011	1	0.261	0.00238373	0.272
TMEM198B_ 55834850_ 55835615_ 55832846_ 55833541_ 55836125_ 55836246	SE	ENSG00000182796,14	TMEM198B	chr12	NA	NA	0.00246615	0.367	0.0017871	0.367
TMEM218_125102131_125102302_125101200_125101303_125102733_125102809	SE	ENSG00000150433,9	TMEM218	chr11	0.305186	-0.198	1	-0.033	0.00244237	0.165
TMEM218_125102131_125102351_125101200_125101303_125102733_125102809	SE	ENSG00000150433,9	TMEM218	chr11	0.284826	-0.203	1	-0.026	0.00199698	0.177
TMEM218_125110490_125110549_125102733_125102809_125110643_125110746	SE	ENSG00000150433,9	TMEM218	chr11	0.00372396	-0.562	1	-0.431	1	0.132
TMEM255A_120285126_120285215_120268243_120268387_120287153_120287222	SE	ENSG00000125355,15	TMEM255A	chrX	0.00469531	0.28	1	0.133	NA	NA
TMEM39A_119458017_119458083_119452508_119452530_119461961_119462148	SE	ENSG00000176142,12	TMEM39A	chr3	0.233154	-0.227	0.000115995	-0.34	1	-0.113
TMEM39A_119458017_119458184_119452446_119452530_119461961_119462148	SE	ENSG00000176142,12	TMEM39A	chr3	0.21435	-0.211	0.000119676	-0.323	1	-0.112
TMEM39A_119458017_119458240_119452446_119452530_119461961_119462008	SE	ENSG00000176142,12	TMEM39A	chr3	0.0598618	-0.178	0.000200672	-0.236	1	-0.057
TMEM45A_100519461_100519608_100492650_100492928_100568821_100568967	SE	ENSG00000181458,10	TMEM45A	chr3	0.00320562	-0.137	0.0508926	-0.074	1	0.063
TMEM45A_100519532_100519608_100492659_100492928_100555208_100555401	SE	ENSG00000181458,10	TMEM45A	chr3	0.10931	-0.136	0.00438281	-0.164	1	-0.028
TMEM51_ 15210489_ 15210562_ 15153767_ 15153954_ 15219325_ 15220339	SE	ENSG00000171729,13	TMEM51	chr1	1	-0.333	0.00276494	-0.333	NA	NA
TMEM51_ 15214894_ 15215431_ 15153732_ 15153954_ 15219325_ 15219346	SE	ENSG00000171729,13	TMEM51	chr1	0.0026416	-0.153	0.00245883	-0.153	NA	NA
TMEM53_ 44654939_ 44655209_ 44645359_ 44645464_ 44660173_ 44660295	SE	ENSG00000126106,13	TMEM53	chr1	0.0489616	0.402	0.762618	0.163	0.87149	-0.24
TMEM53_ 44660173_ 44660295_ 44645359_ 44645464_ 44674330_ 44674402	SE	ENSG00000126106,13	TMEM53	chr1	0.348978	-0.147	0.00775859	-0.23	1	-0.083
TMEM67_ 93785221_ 93785378_ 93782394_ 93782460_ 93786222_ 93786346	SE	ENSG00000164953,15	TMEM67	chr8	0.0487838	-0.161	0.0655512	-0.139	1	0.021
TMEM68_ 55745060_ 55745121_ 55743480_ 55743620_ 55750963_ 55751157	SE	ENSG00000167904,14	TMEM68	chr8	0.397601	0.071	0.822115	-0.031	0.00362076	-0.101
TMEM8B_ 35834460_ 35834650_ 35829447_ 35829955_ 35841133_ 35841267	SE	ENSG00000137103,19	TMEM8B	chr9	0.000102165	-0.401	1	0.004	0.000941947	0.405
TMEM94_ 75491690_ 75491852_ 75491376_ 75491455_ 75492473_ 75492789	SE	ENSG00000177728,16	TMEM94	chr17	1	0.022	0.0237434	0.118	0.279002	0.096
TMUB2_ 44187675_ 44187743_ 44186969_ 44187109_ 44187906_ 44188009	SE	ENSG00000168591,15	TMUB2	chr17	0.00590651	-0.345	0.703682	-0.294	1	0.05
TMUB2_ 44187906_ 44188009_ 44187271_ 44187743_ 44188934_ 44189299	SE	ENSG00000168591,15	TMUB2	chr17	0.613026	-0.168	0.0206999	-0.344	0.523851	-0.176
TNC_115057152_115057425_115042218_115042341_115073602_115073866	SE	ENSG00000041982,15	TNC	chr9	0.00855269	-0.182	1	-0.033	0.0147057	0.148
TNK2_195882285_195882328_195879121_195879175_195883156_195883309	SE	ENSG00000061938,17	TNK2	chr3	0.0411995	0.118	1	-0.021	0.0110572	-0.138
TNRC6B_ 40264687_ 40267036_ 40261831_ 40262173_ 40273424_ 40273600	SE	ENSG00000100354,20	TNRC6B	chr22	0.00033759	-0.501	1	-0.245	0.325561	0.256
TNRC6B_ 40270121_ 40270280_ 40261831_ 40262173_ 40273424_ 40273600	SE	ENSG00000100354,20	TNRC6B	chr22	0.00526795	-0.24	1	-0.037	0.69348	0.203
TOGARAM1_ 45008912_ 45009145_ 45006007_ 45006267_ 45011974_ 45012075	SE	ENSG00000198718,12	TOGARAM1	chr14	1	-0.148	0.0257301	-0.238	1	-0.09
TOM1L2_ 17857768_ 17857855_ 17850892_ 17850952_ 17861475_ 17861551	SE	ENSG00000175662,17	TOM1L2	chr17	0.00364062	0.238	1	0.007	0.00279575	-0.231
TOM1L2_ 17893660_ 17893810_ 17884633_ 17884768_ 17898595_ 17898674	SE	ENSG00000175662,17	TOM1L2	chr17	1	-0.022	0.131476	0.13	0.00670772	0.152
TOR1B_129807187_129807363_129804357_129804479_129808904_129809032	SE	ENSG00000136816,15	TOR1B	chr9	0.00854822	0.121	1	0.01	0.00915541	-0.111
TP53INP1_ 94932069_ 94932107_ 94925971_ 94930728_ 94939859_ 94940220	SE	ENSG00000164938,13	TP53INP1	chr8	0.0129148	-0.494	0.0178802	-0.501	1	-0.007
TPCN1_113226727_113226964_113221437_113221626_113260367_113260412	SE	ENSG00000186815,12	TPCN1	chr12	0.565152	0.052	1	-0.077	0.0436037	-0.129
TPM1_ 63061197_ 63061273_ 63060868_ 63060939_ 63061712_ 63061788	SE	ENSG00000140416,20	TPM1	chr15	0.0132417	-0.178	0.721241	-0.079	0.425619	0.099
TPT1-AS1_ 45344304_ 45344446_ 45341512_ 45341614_ 45369958_ 45370330	SE	ENSG00000170919,15	TPT1-AS1	chr13	1	-0.138	5.35831e-06	-0.826	1	-0.688
TPT1-AS1_ 45344328_ 45344446_ 45341428_ 45341614_ 45369958_ 45370182	SE	ENSG00000170919,15	TPT1-AS1	chr13	1	-0.197	0.000463876	-0.705	0.00605732	-0.508
TPT1-AS1_ 45344378_ 45344446_ 45341598_ 45341630_ 45370079_ 45370182	SE	ENSG00000170919,15	TPT1-AS1	chr13	0.00886719	0.494	1	0.385	1	-0.108
TPT1-AS1_ 45351896_ 45352014_ 45344304_ 45344446_ 45377060_ 45377215	SE	ENSG00000170919,15	TPT1-AS1	chr13	1	-0.055	0.0182316	-0.445	1	-0.389
TRA2A_ 23531180_ 23531270_ 23522131_ 23522432_ 23531788_ 23532041	SE	ENSG00000164548,10	TRA2A	chr7	1	-0.053	0.000187524	-0.25	0.0387295	-0.197
TRAF3IP2-AS1_111574620_111574802_111483540_111483665_111576361_111576470	SE	ENSG00000231889,7	TRAF3IP2-AS1	chr6	0.780549	-0.13	0.0480411	-0.195	1	-0.064
TRAIP_ 49842452_ 49842547_ 49840283_ 49840373_ 49843800_ 49843928	SE	ENSG00000183763,8	TRAIP	chr3	NA	NA	0.000200672	0.242	NA	NA
TRAPPC2_ 13734043_ 13734185_ 13720427_ 13720497_ 13734524_ 13734556	SE	ENSG00000196459,13	TRAPPC2	chrX	0.00877981	0.355	0.0144682	0.489	1	0.134
TRDMT1_ 17161482_ 17161548_ 17160304_ 17160374_ 17174550_ 17174660	SE	ENSG00000107614,21	TRDMT1	chr10	1	0.018	0.000200672	-0.503	0.00136231	-0.52
TRDMT1_ 17162165_ 17162237_ 17160304_ 17160374_ 17174550_ 17174660	SE	ENSG00000107614,21	TRDMT1	chr10	0.366413	-0.291	2.85384e-07	-0.827	0.000204898	-0.536
TRDMT1_ 17168840_ 17168917_ 17160304_ 17160374_ 17174550_ 17174660	SE	ENSG00000107614,21	TRDMT1	chr10	1	-0.062	0.000515108	-0.501	0.000936512	-0.439
TRIM16_ 15682853_ 15682951_ 15680864_ 15680953_ 15683035_ 15683157	SE	ENSG00000221926,12	TRIM16	chr17	0.0836549	0.201	1	-0.006	0.016242	-0.207
TRIM16_ 15682853_ 15682964_ 15680864_ 15680953_ 15683035_ 15683157	SE	ENSG00000221926,12	TRIM16	chr17	0.120154	0.315	1	-0.022	0.00975723	-0.337
TRIM16_ 15682860_ 15682951_ 15680864_ 15680953_ 15683035_ 15683157	SE	ENSG00000221926,12	TRIM16	chr17	0.0996232	0.315	1	0.011	0.0218149	-0.304
TRIM52-AS1_181263627_181263789_181261223_181261384_181271572_181271689	SE	ENSG00000248275,1	TRIM52-AS1	chr5	2.02508e-05	-0.324	1	-0.056	9.6872e-05	0.268
TRIM66_ 8654433_ 8654578_ 8651799_ 8651903_ 8663128_ 8663248	SE	ENSG00000166436,16	TRIM66	chr11	4.59376e-05	0.667	1	0.405	0.00138682	-0.262
TRIQK_ 92954405_ 92954564_ 92916928_ 92917007_ 92966006_ 92966074	SE	ENSG00000205133,11	TRIQK	chr8	0.0139362	0.149	0.181763	0.129	1	-0.02
TRIT1_ 39847219_ 39847297_ 39844530_ 39844640_ 39883317_ 39883480	SE	ENSG00000043514,16	TRIT1	chr1	0.0343354	-0.117	0.0985359	-0.1	1	0.017
TRIT1_ 39847985_ 39848097_ 39844530_ 39844640_ 39883317_ 39883425	SE	ENSG00000043514,16	TRIT1	chr1	1.53818e-06	-0.769	NA	NA	1	0.265
TRMT10B_ 37763628_ 37763753_ 37761902_ 37762117_ 37768075_ 37768228	SE	ENSG00000165275,9	TRMT10B	chr9	0.000121907	-0.331	0.549969	-0.193	0.403005	0.138
TRMT10B_ 37763628_ 37763865_ 37761902_ 37762117_ 37768075_ 37768163	SE	ENSG00000165275,9	TRMT10B	chr9	2.41399e-07	-0.689	0.142083	-0.424	0.125598	0.265
TRPC1_142743484_142743586_142736378_142736533_142748257_142748460	SE	ENSG00000144935,14	TRPC1	chr3	0.0148123	0.196	1	-0.102	0.00349181	-0.298
TRPC1_142784703_142785040_142748257_142748460_142802168_142802344	SE	ENSG00000144935,14	TRPC1	chr3	1	0.484	0.0123045	0.684	NA	NA
TRPC1_142791018_142791158_142784703_142785040_142802168_142802344	SE	ENSG00000144935,14	TRPC1	chr3	0.054651	-0.376	0.0473318	-0.324	1	0.052
TRPM3_ 70811169_ 70811244_ 70784104_ 70784279_ 70827846_ 70828018	SE	ENSG00000083067,22	TRPM3	chr9	0.242388	0.315	0.636283	-0.173	0.000273341	-0.488
TRPT1_ 64225785_ 64225869_ 64224794_ 64224970_ 64226049_ 64226148	SE	ENSG00000149743,13	TRPT1	chr11	NA	NA	0.421075	0.093	0.000461678	0.17
TSC2_ 2077597_ 2077726_ 2076490_ 2076585_ 2079031_ 2079196	SE	ENSG00000103197,17	TSC2	chr16	0.0227859	-0.112	0.351867	-0.022	1	0.09
TSC22D2_150423048_150423120_150408334_150411308_150438197_150438354	SE	ENSG00000196428,12	TSC22D2	chr3	0.0738731	-0.333	0.0472847	-0.263	1	0.07
TSC22D2_150423048_150423120_150408334_150411308_150457075_150457127	SE	ENSG00000196428,12	TSC22D2	chr3	0.0343016	-0.048	0.00120821	-0.114	0.932716	-0.066
[truncated: 180 more rows]
